# Supplementary material
Source: Royal Society of Chemistry journal article supplement (doi:10.1039/d6ob00325g)
Supplement: d6ob00325g1.pdf [file d6ob00325g1.pdf]

# **Metal-Dependent Pathway Selection in Co(III)- and Rh(III)-Catalyzed C–H Activation–Alkyne Coupling: A DFT Study**

*Yuanjun Song<sup>a</sup>, Ran Fang<sup>a\*</sup>, Simeng Qi<sup>a</sup>, Liyuan Meng<sup>a</sup> and Lizi Yang<sup>b\*</sup>*

*<sup>a</sup> Key Laboratory of Chemical Additives for China National Light Industry, College of Chemistry and Chemical Engineering, Shaanxi University of Science and Technology, Xi'an 710021, P. R. China.*

*<sup>b</sup> College of Chemistry and Chemical Engineering, Lanzhou University, Lanzhou 730000, P. R. China*

\*Corresponding author.

E-mail address:

fangr@lzu.edu.cn (R. Fang).

yanglz@lzu.edu.cn (L. Yang).

## Table of contents

|                                                                                                                                                                                                                                              |     |
|----------------------------------------------------------------------------------------------------------------------------------------------------------------------------------------------------------------------------------------------|-----|
| 1. Figure S1. Energy trend graph for optimizing the overall reaction in M06 mode.....                                                                                                                                                        | S-3 |
| 2. Figure S2. Energy trend graph for optimizing the overall reaction in M06L mode.....                                                                                                                                                       | S-3 |
| 3. Figure S3. Free energy profile for the A-series C-H activation ( $\sigma$ bond metathesis mechanism).S-4                                                                                                                                  | S-4 |
| 4. Figure S4. Calculated free energy profile for the alkyne migration insertion. The relative free energies are reported in kcal/mol.....                                                                                                    | S-4 |
| 5. Figure S5. The computational energy distribution map of substrate 2a participating in the CMD process. ....                                                                                                                               | S-5 |
| 6. Figure S6. Free energy profile for the A-series alkyne migration insertion.....                                                                                                                                                           | S-5 |
| 7. Figure S7. Calculated the free energy profile of $\beta$ -C (alkynyl) elimination process from the post-insertion alkenyl-cobalt intermediate A-5a. Free energies are given in kcal/mol. ....                                             | S-6 |
| 8. Figure S8. Calculated the free energy distribution of the cobalt/rhodium-catalyzed catalytic cycles were compared for the 2-pyridone substrates.....                                                                                      | S-7 |
| 9. Figure S9. Calculated the free energy distribution of the Co and Rh-catalyzed catalytic cycles was compared for the 2-pyridone substrates. The relative free energies are reported in kcal/mol. ....                                      | S-7 |
| 10. Figure S10. Calculated NPA charges on transition states B-TS4-Co and B-TS4-Rh (black numerals indicate NPA charges (in a.u.), and Red numerals represent bond lengths (in Å)). ....                                                      | S-8 |
| 11. Figure S11. Calculated the free energy profile of representative intermolecular exchange pathways involving alkyne dissociation and recombination between distinct phosphine oxide substrates. Free energies are given in kcal/mol. .... | S-8 |
| 12. The Cartesian coordinates of the stationary points.....                                                                                                                                                                                  | S-8 |

Figures S1 and S2 compare the energy profiles obtained at the M06 and M06-L levels and support the reliability of the computational protocol.

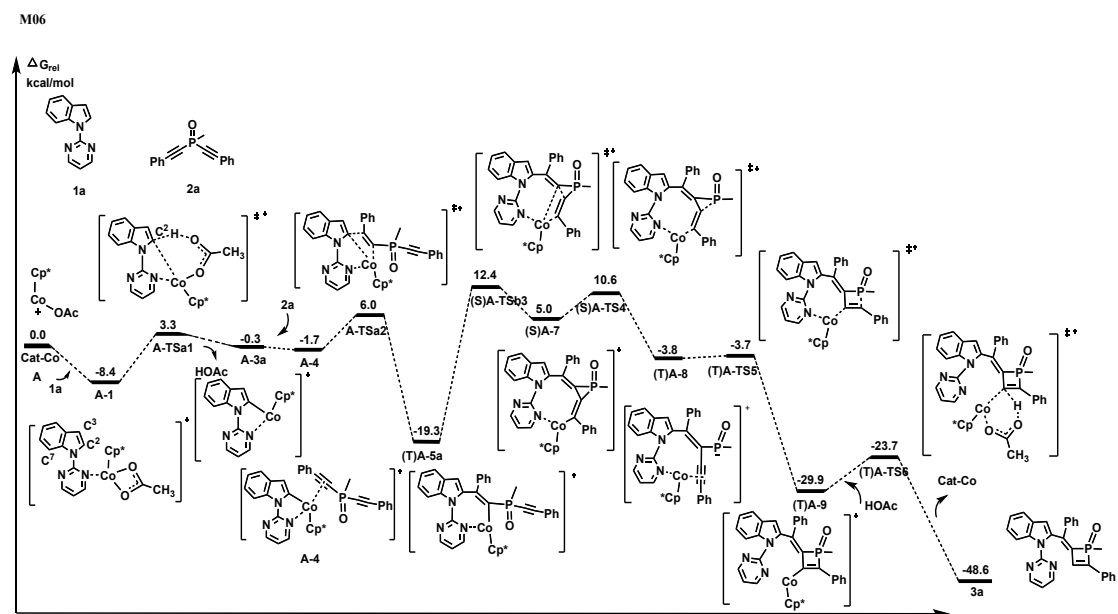

**Figure S1.** Energy trend graph for optimizing the overall reaction in M06 mode. Species labeled with “S” and “T” correspond to singlet and triplet states, respectively. The relative free energies are reported in kcal/mol.

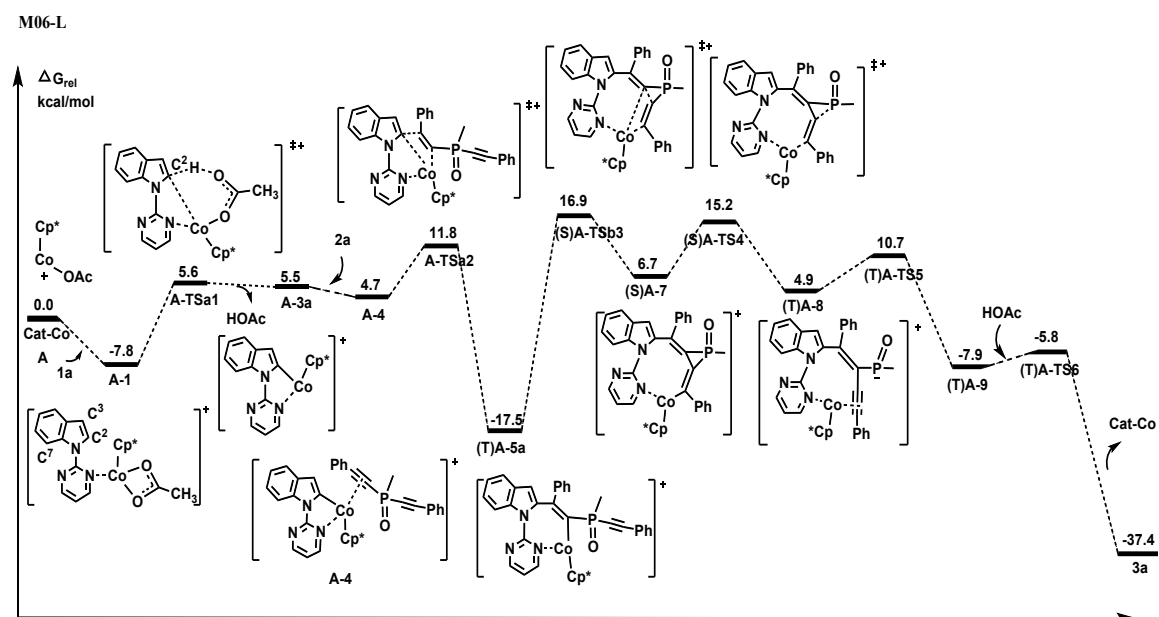

**Figure S2.** Energy trend graph for optimizing the overall reaction in M06L mode. Species labeled with “S” and “T” correspond to singlet and triplet states, respectively. The relative free energies are reported in kcal/mol.



Figures S5 and S6 discuss alternative reaction sequences and regioisomeric migratory insertion pathways.

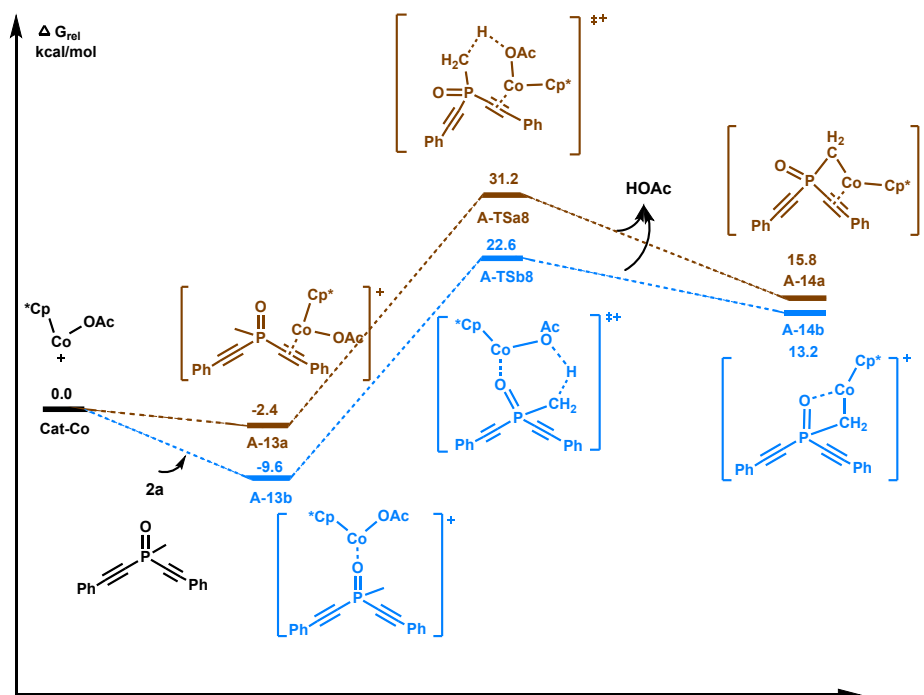

**Figure S5.** The computational energy distribution map of substrate **2a** participating in the CMD process. The relative free energies are reported in kcal/mol.

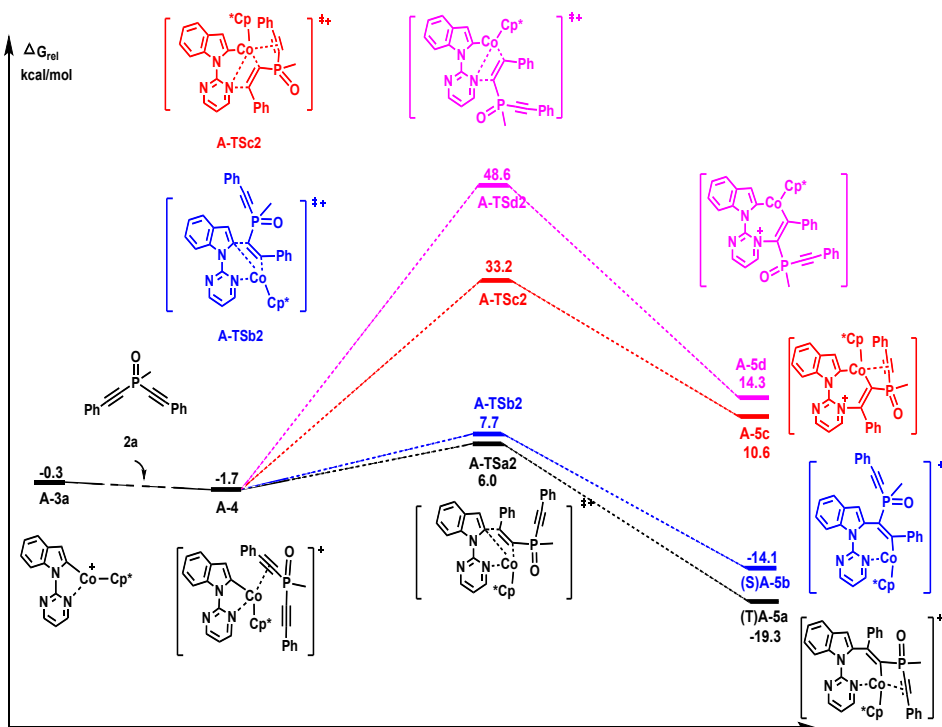

**Figure S6.** Free energy profile for the A-series alkyne migration insertion. The relative free energies are reported in kcal/mol.

Figure S7 provides the complete post-insertion pathway, including  $\beta$ -C(alkynyl) elimination, second alkyne migratory insertion, anti-elimination, cyclization, and catalyst regeneration.

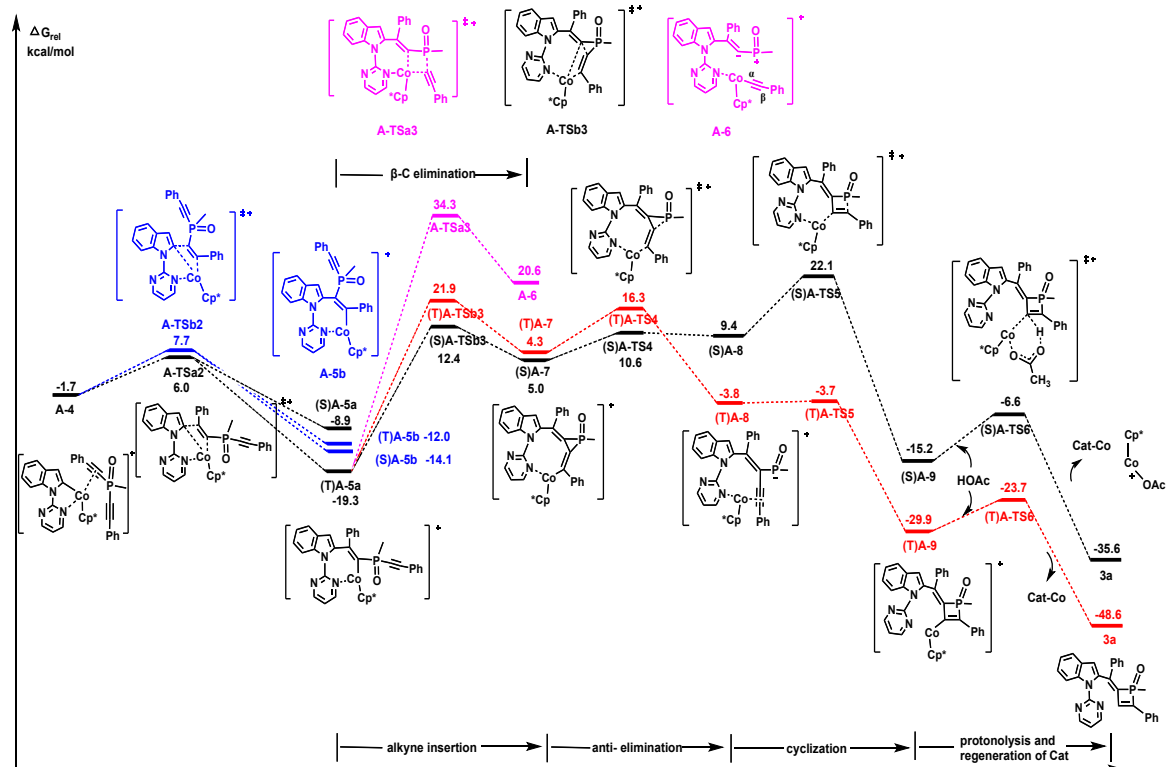

**Figure S7.** Calculated the free energy profile of  $\beta$ -C (alkynyl) elimination process from the post-insertion alkenyl-cobalt intermediate A-5a. Species labeled with "S" and "T" correspond to singlet and triplet states, respectively. Free energies are given in kcal/mol.

Figures S8 and S9 compare the Co- and Rh-catalyzed pathways for the 2-pyridone substrates.

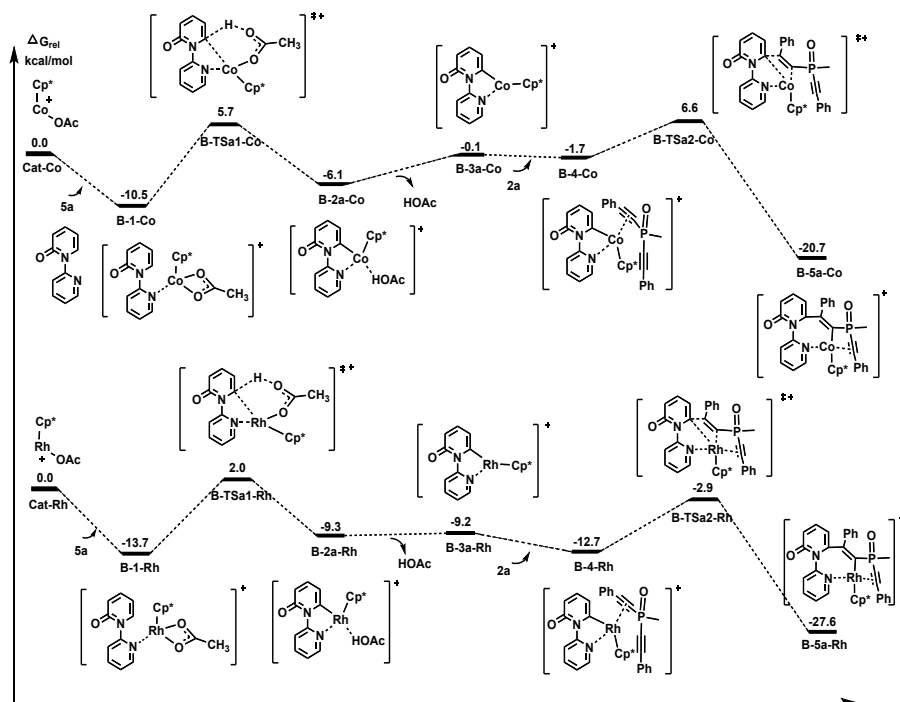

**Figure S8.** Calculated the free energy distribution of the cobalt/rhodium-catalyzed catalytic cycles were compared

for the 2-pyridone substrates. The relative free energies are reported in kcal/mol.

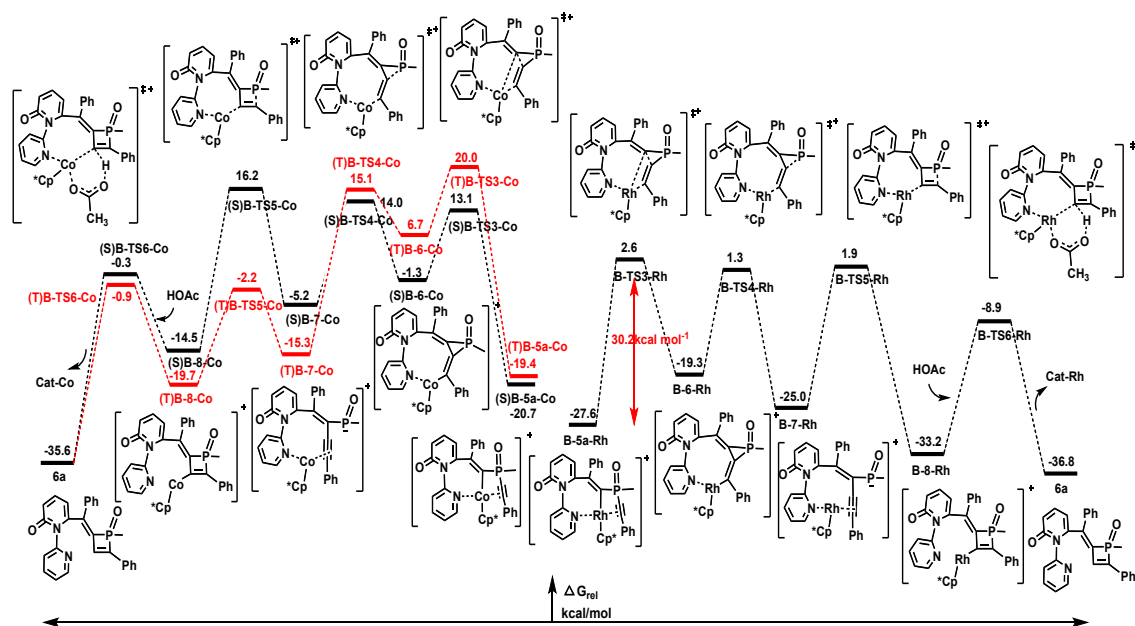

**Figure S9.** Calculated the free energy distribution of the Co and Rh-catalyzed catalytic cycles was compared for the 2-pyridone substrates. Species labeled with “S” and “T” correspond to singlet and triplet states, respectively. The relative free energies are reported in kcal/mol.

Figure S10 provides additional charge/structural analysis of key transition states, and Figure S11 evaluates representative intermolecular exchange pathways relevant to the crossover experiment.

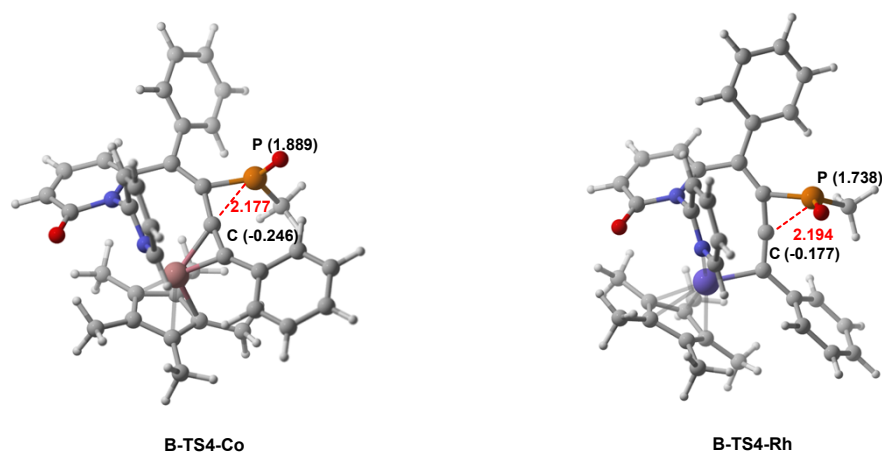

**Figure S10.** Calculated NPA charges on transition states **B-TS4-Co** and **B-TS4-Rh** (black numerals indicate NPA charges (in a.u.), and Red numerals represent bond lengths (in Å))

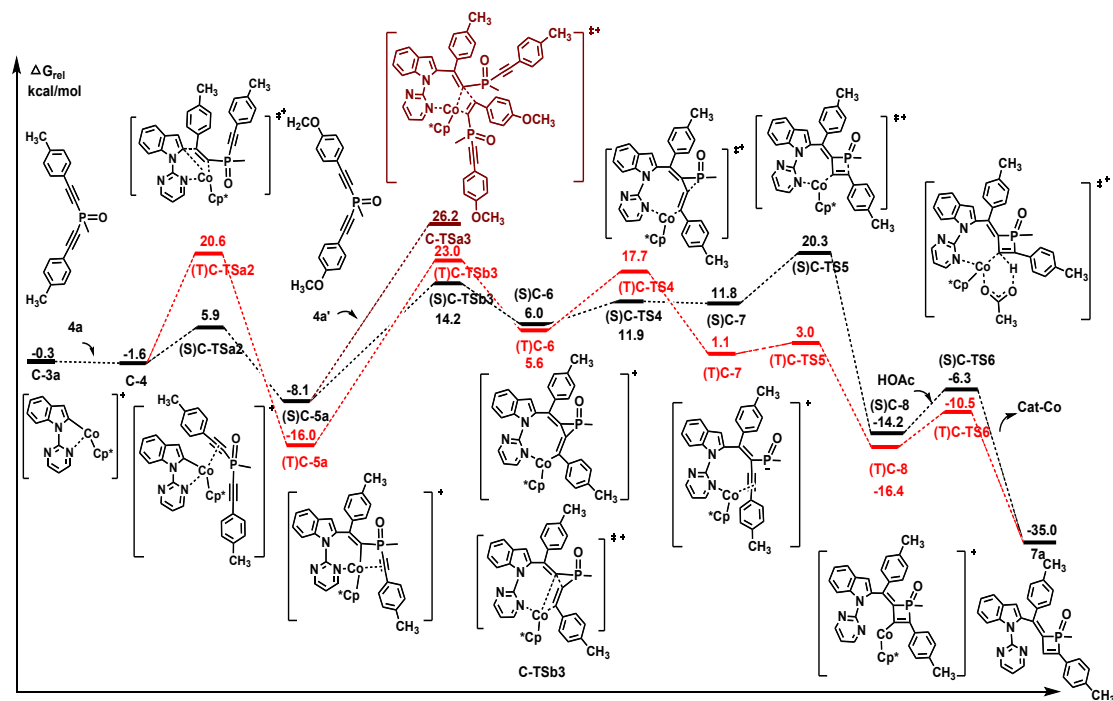

**Figure S11.** Calculated the free energy profile of representative intermolecular exchange pathways involving alkyne dissociation and recombination between distinct phosphine oxide substrates. Species labeled with “S” and “T” correspond to singlet and triplet states, respectively. Free energies are given in kcal/mol.

## The Cartesian coordinates of the stationary points

### Cat-Co

1 1

Number of imaginary frequencies: 0

|   |             |             |             |
|---|-------------|-------------|-------------|
| C | 1.06787400  | -1.17619800 | 0.68946500  |
| C | 1.63878700  | -0.73015900 | -0.52828200 |
| C | 1.63883200  | 0.72991200  | -0.52850200 |
| C | 1.06795500  | 1.17636600  | 0.68911100  |
| C | 0.65691600  | 0.00021600  | 1.43352000  |
| O | -1.83807900 | 1.08358100  | -0.43936100 |
| C | -2.52189900 | 0.00002000  | -0.53620200 |
| O | -1.83806900 | -1.08357200 | -0.43943400 |
| C | -3.98569000 | -0.00006000 | -0.72452400 |
| C | -0.05156600 | 0.00044600  | 2.73258700  |
| H | -0.67567800 | -0.88712300 | 2.85748500  |
| H | 0.67716300  | 0.00064300  | 3.55291400  |
| H | -0.67574900 | 0.88801700  | 2.85712800  |
| C | 0.79087300  | -2.57492800 | 1.09369000  |
| H | 0.87337900  | -3.26887400 | 0.25634500  |
| H | 1.50484500  | -2.89243800 | 1.86152400  |
| H | -0.21052100 | -2.68040500 | 1.51844000  |
| C | 2.11114300  | -1.57235400 | -1.65328200 |
| H | 1.84661800  | -1.14689500 | -2.62488300 |
| H | 3.20490700  | -1.64494900 | -1.63095900 |
| H | 1.71372400  | -2.58712100 | -1.60612200 |
| C | 2.11120500  | 1.57172600  | -1.65377900 |

|                                              |             |             |                             |
|----------------------------------------------|-------------|-------------|-----------------------------|
| H                                            | 1.71379200  | 2.58651100  | -1.60697200                 |
| H                                            | 3.20497000  | 1.64432600  | -1.63145800                 |
| H                                            | 1.84670300  | 1.14593200  | -2.62523900                 |
| C                                            | 0.79105400  | 2.57523800  | 1.09291700                  |
| H                                            | 1.50499000  | 2.89289200  | 1.86072500                  |
| H                                            | 0.87370500  | 3.26894300  | 0.25538800                  |
| H                                            | -0.21036700 | 2.68093100  | 1.51755200                  |
| H                                            | -4.30602400 | -0.89766800 | -1.25305800                 |
| H                                            | -4.46591300 | -0.00407500 | 0.25910600                  |
| H                                            | -4.30712700 | 0.90073800  | -1.24685100                 |
| Co                                           | -0.24433800 | -0.00003000 | -0.30300100                 |
| Zero-point correction=                       |             |             | 0.274414 (Hartree/Particle) |
| Thermal correction to Energy=                |             |             | 0.293319                    |
| Thermal correction to Enthalpy=              |             |             | 0.294263                    |
| Thermal correction to Gibbs Free Energy=     |             |             | 0.226618                    |
| Sum of electronic and zero-point Energies=   |             |             | -763.984521                 |
| Sum of electronic and thermal Energies=      |             |             | -763.965616                 |
| Sum of electronic and thermal Enthalpies=    |             |             | -763.964672                 |
| Sum of electronic and thermal Free Energies= |             |             | -764.032317                 |
| E(RM06L) =                                   | -764.258935 | A.U.        |                             |

### Cat-Rh

1 1

Number of imaginary frequencies: 0

|    |             |             |             |
|----|-------------|-------------|-------------|
| Rh | -0.35218600 | -0.00014200 | -0.19468600 |
| C  | 1.33795200  | -1.18254100 | 0.56694600  |
| C  | 1.65461500  | -0.73414300 | -0.74457300 |
| C  | 1.65421100  | 0.73480900  | -0.74444300 |

|   |             |             |             |
|---|-------------|-------------|-------------|
| C | 1.33735400  | 1.18281200  | 0.56718000  |
| C | 1.08818100  | 0.00000400  | 1.38216500  |
| O | -2.15128900 | 1.09293600  | -0.18069000 |
| C | -2.82562300 | -0.00020600 | -0.22796600 |
| O | -2.15129900 | -1.09337400 | -0.18124000 |
| C | -4.31278400 | -0.00026100 | -0.30478000 |
| C | 0.75088800  | -0.00021700 | 2.83255500  |
| H | 0.18303500  | -0.88850700 | 3.11462100  |
| H | 1.68328500  | 0.00000600  | 3.41329600  |
| H | 0.18252200  | 0.88770000  | 3.11476800  |
| C | 1.24438100  | -2.59514000 | 1.04446900  |
| H | 1.09095400  | -3.29055800 | 0.21835800  |
| H | 2.17394300  | -2.87297900 | 1.55552200  |
| H | 0.42177800  | -2.72277200 | 1.75151400  |
| C | 1.96089400  | -1.58439900 | -1.93211600 |
| H | 1.56584700  | -1.14691300 | -2.85191400 |
| H | 3.04879300  | -1.66877900 | -2.04846400 |
| H | 1.55366800  | -2.59074600 | -1.82591000 |
| C | 1.95997300  | 1.58543300  | -1.93185500 |
| H | 1.55228500  | 2.59156900  | -1.82541700 |
| H | 3.04781900  | 1.67034300  | -2.04830600 |
| H | 1.56503000  | 1.14793200  | -2.85169200 |
| C | 1.24300200  | 2.59527800  | 1.04494500  |
| H | 2.17238500  | 2.87352200  | 1.55610100  |
| H | 1.08924900  | 3.29075800  | 0.21894800  |
| H | 0.42028500  | 2.72234400  | 1.75196000  |
| H | -4.66401900 | -0.89965900 | -0.81319300 |

|                                              |             |             |                             |
|----------------------------------------------|-------------|-------------|-----------------------------|
| H                                            | -4.71135100 | -0.00502500 | 0.71659400                  |
| H                                            | -4.66469100 | 0.90307000  | -0.80561600                 |
| Zero-point correction=                       |             |             | 0.273780 (Hartree/Particle) |
| Thermal correction to Energy=                |             |             | 0.293059                    |
| Thermal correction to Enthalpy=              |             |             | 0.294004                    |
| Thermal correction to Gibbs Free Energy=     |             |             | 0.224356                    |
| Sum of electronic and zero-point Energies=   |             |             | -727.697709                 |
| Sum of electronic and thermal Energies=      |             |             | -727.678429                 |
| Sum of electronic and thermal Enthalpies=    |             |             | -727.677485                 |
| Sum of electronic and thermal Free Energies= |             |             | -727.747133                 |
| E(RB3LYP) =                                  | -727.971488 | A.U.        |                             |

### 1a

0 1

Number of imaginary frequencies: 0

|   |            |             |             |
|---|------------|-------------|-------------|
| C | 2.15549000 | 0.85004200  | 0.00003500  |
| C | 1.09784600 | -0.09450600 | 0.00005400  |
| C | 1.34470700 | -1.46705600 | -0.00005500 |
| C | 2.67334600 | -1.87893800 | -0.00021900 |
| C | 3.73043800 | -0.95992800 | -0.00027200 |
| C | 3.48075500 | 0.40464500  | -0.00012800 |
| C | 1.56675100 | 2.15687200  | 0.00027500  |
| C | 0.21878400 | 2.00093800  | 0.00027200  |
| H | 0.53167400 | -2.17909300 | -0.00002800 |
| H | 2.89112000 | -2.94315600 | -0.00031500 |
| H | 4.75476200 | -1.32153700 | -0.00038900 |
| H | 4.29760500 | 1.12136300  | -0.00013100 |
| H | 2.09059900 | 3.10217600  | 0.00035500  |

|                                              |             |             |                             |
|----------------------------------------------|-------------|-------------|-----------------------------|
| H                                            | -0.58619000 | 2.71722400  | 0.00035400                  |
| C                                            | -1.40777700 | 0.17051200  | 0.00007900                  |
| N                                            | -1.58703200 | -1.15656900 | 0.00050800                  |
| C                                            | -2.85617000 | -1.56376300 | 0.00040900                  |
| C                                            | -3.93512800 | -0.68880400 | -0.00016200                 |
| C                                            | -3.61424700 | 0.66531500  | -0.00054600                 |
| N                                            | -2.36281400 | 1.11511100  | -0.00039000                 |
| H                                            | -3.00687300 | -2.64276900 | 0.00076400                  |
| H                                            | -4.96055500 | -1.03798200 | -0.00028700                 |
| H                                            | -4.39286000 | 1.42759100  | -0.00090400                 |
| N                                            | -0.09987800 | 0.63920100  | 0.00018700                  |
| Zero-point correction=                       |             |             | 0.187208 (Hartree/Particle) |
| Thermal correction to Energy=                |             |             | 0.197689                    |
| Thermal correction to Enthalpy=              |             |             | 0.198633                    |
| Thermal correction to Gibbs Free Energy=     |             |             | 0.150279                    |
| Sum of electronic and zero-point Energies=   |             |             | -626.712256                 |
| Sum of electronic and thermal Energies=      |             |             | -626.701775                 |
| Sum of electronic and thermal Enthalpies=    |             |             | -626.700831                 |
| Sum of electronic and thermal Free Energies= |             |             | -626.749185                 |
| E(RM06L) =                                   | -626.899464 | A.U.        |                             |

**2a**

0 1

Number of imaginary frequencies: 0

|   |            |             |             |
|---|------------|-------------|-------------|
| C | 2.36297500 | 0.39245100  | -0.03106800 |
| C | 3.48952100 | -0.46784900 | 0.02790900  |
| C | 4.79036000 | 0.05258100  | -0.08643400 |
| C | 3.31718200 | -1.85253400 | 0.19936600  |

|   |             |             |             |
|---|-------------|-------------|-------------|
| C | 5.88794100  | -0.79549200 | -0.02943800 |
| H | 4.92207700  | 1.12141700  | -0.22268100 |
| C | 4.42201500  | -2.69115300 | 0.25468100  |
| H | 2.31193300  | -2.25308300 | 0.28595200  |
| C | 5.70829300  | -2.16692900 | 0.14118700  |
| H | 6.88903200  | -0.38448000 | -0.11997900 |
| H | 4.27905300  | -3.75955900 | 0.38670600  |
| H | 6.56986400  | -2.82666900 | 0.18474200  |
| C | 1.38746500  | 1.12448900  | -0.07342400 |
| P | 0.03282600  | 2.23187500  | -0.24020300 |
| C | -2.34976800 | 0.45937000  | -0.04869100 |
| C | -3.50159400 | -0.36774300 | -0.01547300 |
| C | -4.35892000 | -0.36020500 | 1.09848800  |
| C | -3.79768100 | -1.20787800 | -1.10332800 |
| C | -5.48218100 | -1.17567900 | 1.11952500  |
| H | -4.13070800 | 0.28973300  | 1.93761000  |
| C | -4.92332400 | -2.01932600 | -1.07127800 |
| H | -3.13619100 | -1.20984300 | -1.96390000 |
| C | -5.76743400 | -2.00654300 | 0.03762900  |
| H | -6.13894000 | -1.16284500 | 1.98430600  |
| H | -5.14424100 | -2.66450500 | -1.91637500 |
| H | -6.64743300 | -2.64263100 | 0.05844200  |
| C | -1.34961900 | 1.15785100  | -0.08109100 |
| C | 0.03669100  | 3.15955400  | 1.31407500  |
| H | -0.84138600 | 3.80806400  | 1.34242900  |
| H | 0.02286700  | 2.49174800  | 2.17810400  |
| H | 0.93284400  | 3.78211100  | 1.35283100  |

|                                              |              |            |                             |
|----------------------------------------------|--------------|------------|-----------------------------|
| O                                            | 0.04841400   | 3.06532900 | -1.47511900                 |
| Zero-point correction=                       |              |            | 0.245085 (Hartree/Particle) |
| Thermal correction to Energy=                |              |            | 0.263097                    |
| Thermal correction to Enthalpy=              |              |            | 0.264041                    |
| Thermal correction to Gibbs Free Energy=     |              |            | 0.193906                    |
| Sum of electronic and zero-point Energies=   |              |            | -1071.792494                |
| Sum of electronic and thermal Energies=      |              |            | -1071.774481                |
| Sum of electronic and thermal Enthalpies=    |              |            | -1071.773537                |
| Sum of electronic and thermal Free Energies= |              |            | -1071.843672                |
| E(RM06L) =                                   | -1072.037578 | A.U.       |                             |

### 3a

0 1

Number of imaginary frequencies: 0

|   |             |            |             |
|---|-------------|------------|-------------|
| C | -1.23084000 | 1.09462400 | -0.46355600 |
| C | -1.87771100 | 2.36366200 | -0.12277000 |
| C | -1.42068200 | 3.57309900 | -0.67026900 |
| C | -2.95610700 | 2.40490700 | 0.77582600  |
| C | -2.00438600 | 4.78232900 | -0.31793700 |
| H | -0.62389900 | 3.54664500 | -1.40962400 |
| C | -3.54033200 | 3.61532900 | 1.12575600  |
| H | -3.31004100 | 1.47622400 | 1.21476500  |
| C | -3.06684500 | 4.80850900 | 0.58338500  |
| H | -1.64018700 | 5.70630800 | -0.75831000 |
| H | -4.36552200 | 3.62930200 | 1.83221500  |
| H | -3.52759600 | 5.75356000 | 0.85623200  |
| C | 0.10279800  | 1.02497600 | -0.74822200 |
| P | 1.59878000  | 1.96505800 | -0.27097500 |

|   |             |             |             |
|---|-------------|-------------|-------------|
| C | 2.21153400  | 0.31505000  | -0.72771700 |
| C | 3.48545800  | -0.35197300 | -0.66572300 |
| C | 4.61917400  | 0.33690800  | -0.19818600 |
| C | 3.62616100  | -1.70463800 | -1.03135800 |
| C | 5.85097800  | -0.29878800 | -0.11416300 |
| H | 4.51535200  | 1.37252300  | 0.11900900  |
| C | 4.85904200  | -2.33421200 | -0.94770300 |
| H | 2.75387800  | -2.25662600 | -1.37424700 |
| C | 5.97738200  | -1.63425300 | -0.49186900 |
| H | 6.71593400  | 0.24751100  | 0.25102900  |
| H | 4.95207900  | -3.37754200 | -1.23621900 |
| H | 6.94106100  | -2.13083700 | -0.42589000 |
| C | 0.95311600  | -0.08945000 | -1.09337400 |
| C | 2.09251500  | 3.08856400  | -1.61446400 |
| H | 3.17739600  | 3.21997400  | -1.59278200 |
| H | 1.80212200  | 2.69439800  | -2.59108000 |
| H | 1.63231500  | 4.06691200  | -1.46071400 |
| O | 1.78680900  | 2.54615400  | 1.09444800  |
| C | -3.54285200 | -1.76300900 | -0.86666900 |
| C | -2.45608500 | -2.34452900 | -0.16525400 |
| C | -2.43179500 | -3.69392000 | 0.18000300  |
| C | -3.51528900 | -4.46971700 | -0.21242300 |
| C | -4.59445300 | -3.91996800 | -0.92346000 |
| C | -4.61863500 | -2.57455000 | -1.25344200 |
| C | -3.25223600 | -0.37574300 | -1.01813600 |
| C | -2.03398400 | -0.12492900 | -0.43640400 |
| H | -1.58680200 | -4.11855600 | 0.70923200  |

|                                              |              |             |                             |
|----------------------------------------------|--------------|-------------|-----------------------------|
| H                                            | -3.52113800  | -5.52843800 | 0.03008500                  |
| H                                            | -5.42034600  | -4.56140800 | -1.21698800                 |
| H                                            | -5.45754700  | -2.14898400 | -1.79726800                 |
| H                                            | -3.83521300  | 0.35894000  | -1.55714300                 |
| C                                            | -0.47852900  | -1.40111400 | 1.02254600                  |
| N                                            | 0.29752100   | -2.48678800 | 0.94343300                  |
| C                                            | 1.36852400   | -2.47466500 | 1.74380300                  |
| C                                            | 1.68640900   | -1.39581400 | 2.55818900                  |
| C                                            | 0.76828400   | -0.34948700 | 2.58188500                  |
| N                                            | -0.34363700  | -0.35584300 | 1.84422100                  |
| H                                            | 2.00526700   | -3.35737500 | 1.70121200                  |
| H                                            | 2.59166800   | -1.37600600 | 3.15358300                  |
| H                                            | 0.91732300   | 0.52566600  | 3.21043000                  |
| N                                            | -1.54193800  | -1.32727400 | 0.10483500                  |
| H                                            | 0.64043300   | -1.04116500 | -1.52567400                 |
| Zero-point correction=                       |              |             | 0.436966 (Hartree/Particle) |
| Thermal correction to Energy=                |              |             | 0.464864                    |
| Thermal correction to Enthalpy=              |              |             | 0.465809                    |
| Thermal correction to Gibbs Free Energy=     |              |             | 0.377141                    |
| Sum of electronic and zero-point Energies=   |              |             | -1698.597232                |
| Sum of electronic and thermal Energies=      |              |             | -1698.569333                |
| Sum of electronic and thermal Enthalpies=    |              |             | -1698.568389                |
| Sum of electronic and thermal Free Energies= |              |             | -1698.657056                |
| E(RM06L) =                                   | -1699.034197 | A.U.        |                             |

**4a**

0 1

Number of imaginary frequencies: 0

|   |             |             |             |
|---|-------------|-------------|-------------|
| C | 2.36640400  | 0.73161900  | -0.04363200 |
| C | 3.49581300  | -0.12395200 | 0.00357500  |
| C | 4.79697600  | 0.39768200  | -0.09449300 |
| C | 3.33543200  | -1.51240100 | 0.15218900  |
| C | 5.89512100  | -0.44765700 | -0.04610400 |
| H | 4.93086900  | 1.46903700  | -0.20788000 |
| C | 4.44381700  | -2.34391600 | 0.19854200  |
| H | 2.33389000  | -1.92368700 | 0.23270800  |
| C | 5.74212100  | -1.83109800 | 0.09786500  |
| H | 6.89602900  | -0.02852800 | -0.12083700 |
| H | 4.30343400  | -3.41601400 | 0.31710700  |
| C | 1.38695600  | 1.45940900  | -0.07657200 |
| P | 0.02532300  | 2.55904900  | -0.22863000 |
| C | -2.34727700 | 0.77226600  | -0.05170700 |
| C | -3.49482900 | -0.05917900 | -0.02256000 |
| C | -4.35034300 | -0.07153200 | 1.09241800  |
| C | -3.79567600 | -0.89419600 | -1.11238200 |
| C | -5.46666300 | -0.89355600 | 1.10900800  |
| H | -4.12436200 | 0.56693700  | 1.94105600  |
| C | -4.91581300 | -1.71063400 | -1.07990500 |
| H | -3.13889000 | -0.89256400 | -1.97669900 |
| C | -5.77309900 | -1.72537400 | 0.02595000  |
| H | -6.11722300 | -0.89451000 | 1.98073700  |
| H | -5.13347600 | -2.35369700 | -1.92966800 |
| C | -1.35053400 | 1.47632400  | -0.08009300 |
| C | 0.02420200  | 3.46859400  | 1.33706400  |
| H | -0.85769600 | 4.11152800  | 1.37361200  |

|                                              |              |             |                             |
|----------------------------------------------|--------------|-------------|-----------------------------|
| H                                            | 0.01468700   | 2.79032700  | 2.19297200                  |
| H                                            | 0.91674100   | 4.09585800  | 1.38314500                  |
| O                                            | 0.03489200   | 3.41006400  | -1.45204800                 |
| C                                            | 6.93180300   | -2.73981900 | 0.11679400                  |
| H                                            | 6.75330400   | -3.62818700 | 0.72851200                  |
| H                                            | 7.17684600   | -3.09225300 | -0.89190900                 |
| H                                            | 7.82128300   | -2.23467600 | 0.50221700                  |
| C                                            | -6.99774400  | -2.58648500 | 0.04029200                  |
| H                                            | -7.24801000  | -2.91797600 | 1.05163400                  |
| H                                            | -7.86946200  | -2.04160600 | -0.34043400                 |
| H                                            | -6.87694400  | -3.47280500 | -0.58792300                 |
| Zero-point correction=                       |              |             | 0.299654 (Hartree/Particle) |
| Thermal correction to Energy=                |              |             | 0.320687                    |
| Thermal correction to Enthalpy=              |              |             | 0.321631                    |
| Thermal correction to Gibbs Free Energy=     |              |             | 0.242051                    |
| Sum of electronic and zero-point Energies=   |              |             | -1150.368068                |
| Sum of electronic and thermal Energies=      |              |             | -1150.347035                |
| Sum of electronic and thermal Enthalpies=    |              |             | -1150.346090                |
| Sum of electronic and thermal Free Energies= |              |             | -1150.425671                |
| E(RM06L) =                                   | -1150.667722 | A.U.        |                             |

**4a'**

0 1

Number of imaginary frequencies: 0

|   |            |             |             |
|---|------------|-------------|-------------|
| C | 2.36751200 | 1.00058100  | 0.04071300  |
| C | 3.52056700 | 0.18532500  | 0.14402700  |
| C | 4.21861200 | -0.21392700 | -1.00604700 |
| C | 3.99597700 | -0.24435100 | 1.39928500  |

|   |             |             |             |
|---|-------------|-------------|-------------|
| C | 5.35028200  | -1.01358600 | -0.91758600 |
| H | 3.86322900  | 0.11215800  | -1.97853100 |
| C | 5.12081900  | -1.03922600 | 1.49476100  |
| H | 3.46601200  | 0.05653600  | 2.29765600  |
| C | 5.80688800  | -1.43043300 | 0.33712000  |
| H | 5.86825700  | -1.30557400 | -1.82411500 |
| H | 5.49459800  | -1.37518400 | 2.45633500  |
| C | 1.36986300  | 1.69874400  | -0.05186200 |
| P | -0.00443600 | 2.76713800  | -0.27661300 |
| C | -2.36317300 | 0.95684800  | -0.17383500 |
| C | -3.49958900 | 0.11270000  | -0.17118100 |
| C | -4.48305500 | 0.22667800  | 0.82286400  |
| C | -3.66936100 | -0.86516900 | -1.17238800 |
| C | -5.59849100 | -0.60046400 | 0.82851000  |
| H | -4.36618600 | 0.97663400  | 1.59921100  |
| C | -4.77549100 | -1.69116500 | -1.17276100 |
| H | -2.91719300 | -0.96231000 | -1.94878700 |
| C | -5.74885600 | -1.56577900 | -0.17243900 |
| H | -6.34168800 | -0.48776500 | 1.60980000  |
| H | -4.91514900 | -2.44630100 | -1.93922100 |
| C | -1.37407500 | 1.67318700  | -0.17742800 |
| C | -0.09095100 | 3.68947600  | 1.28020900  |
| H | -0.98901000 | 4.31066200  | 1.27516600  |
| H | -0.12073600 | 3.01733200  | 2.14057600  |
| H | 0.78401600  | 4.33801100  | 1.35756400  |
| O | 0.05052400  | 3.60531600  | -1.50814600 |
| C | 7.61668200  | -2.62165200 | -0.61089200 |

|                                              |              |             |                             |
|----------------------------------------------|--------------|-------------|-----------------------------|
| H                                            | 8.44549000   | -3.22815500 | -0.24764800                 |
| H                                            | 6.99341200   | -3.22478800 | -1.28299900                 |
| H                                            | 8.01227600   | -1.76364500 | -1.16877800                 |
| C                                            | -7.79988100  | -2.32063600 | 0.73113800                  |
| H                                            | -7.39831500  | -2.51352800 | 1.73396700                  |
| H                                            | -8.27591000  | -1.33202100 | 0.72379800                  |
| H                                            | -8.54291800  | -3.07961500 | 0.48911800                  |
| O                                            | -6.79644700  | -2.42281200 | -0.26031800                 |
| O                                            | 6.89850800   | -2.21030700 | 0.53632000                  |
| Zero-point correction=                       |              |             | 0.310439 (Hartree/Particle) |
| Thermal correction to Energy=                |              |             | 0.333482                    |
| Thermal correction to Enthalpy=              |              |             | 0.334426                    |
| Thermal correction to Gibbs Free Energy=     |              |             | 0.252686                    |
| Sum of electronic and zero-point Energies=   |              |             | -1300.754399                |
| Sum of electronic and thermal Energies=      |              |             | -1300.731355                |
| Sum of electronic and thermal Enthalpies=    |              |             | -1300.730411                |
| Sum of electronic and thermal Free Energies= |              |             | -1300.812151                |
| E(RM06L) =                                   | -1301.064837 | A.U.        |                             |

## 5a

0 1

Number of imaginary frequencies: 0

|   |             |             |             |
|---|-------------|-------------|-------------|
| C | 1.21505100  | -1.36870300 | 0.26622000  |
| C | 2.56468800  | -1.53362700 | 0.27452100  |
| C | 3.39589800  | -0.39960400 | 0.04818300  |
| C | 2.83933800  | 0.82415200  | -0.16959400 |
| C | 1.40623400  | 1.04356000  | -0.18199700 |
| C | -0.81335900 | -0.08743700 | 0.02993500  |

|                                              |             |             |                             |
|----------------------------------------------|-------------|-------------|-----------------------------|
| C                                            | -2.74054100 | -1.24807400 | -0.41008400                 |
| C                                            | -3.54510000 | -0.17664500 | -0.03055800                 |
| C                                            | -2.91341000 | 0.98618700  | 0.41144500                  |
| C                                            | -1.52370200 | 1.04519300  | 0.45160100                  |
| H                                            | 0.51840800  | -2.18295100 | 0.40814000                  |
| H                                            | 2.98203700  | -2.51656000 | 0.45364000                  |
| H                                            | 4.47646400  | -0.51410200 | 0.04922500                  |
| H                                            | 3.43458300  | 1.71054500  | -0.35362600                 |
| H                                            | -3.18109700 | -2.18085900 | -0.75541400                 |
| H                                            | -4.62603900 | -0.25426400 | -0.07710500                 |
| H                                            | -3.49572200 | 1.84545900  | 0.72984700                  |
| H                                            | -1.00190400 | 1.93106900  | 0.77844500                  |
| N                                            | 0.62464200  | -0.13764500 | 0.06290700                  |
| N                                            | -1.40403000 | -1.20847500 | -0.38725900                 |
| O                                            | 0.87980000  | 2.13431300  | -0.38759100                 |
| Zero-point correction=                       |             |             | 0.162534 (Hartree/Particle) |
| Thermal correction to Energy=                |             |             | 0.172117                    |
| Thermal correction to Enthalpy=              |             |             | 0.173061                    |
| Thermal correction to Gibbs Free Energy=     |             |             | 0.126760                    |
| Sum of electronic and zero-point Energies=   |             |             | -570.474145                 |
| Sum of electronic and thermal Energies=      |             |             | -570.464562                 |
| Sum of electronic and thermal Enthalpies=    |             |             | -570.463618                 |
| Sum of electronic and thermal Free Energies= |             |             | -570.509919                 |
| E(RB3LYP) =                                  | -570.636679 | A.U.        |                             |

**6a**

0 1

Number of imaginary frequencies: 0

|   |             |             |             |
|---|-------------|-------------|-------------|
| C | 1.52973900  | -0.40943100 | -0.64567900 |
| C | 2.59010500  | -1.32743600 | -0.18791600 |
| C | 2.48892700  | -2.71785200 | -0.37542700 |
| C | 3.73350700  | -0.83179600 | 0.46881600  |
| C | 3.46759600  | -3.58094600 | 0.10759400  |
| H | 1.65094400  | -3.11976500 | -0.93138600 |
| C | 4.71342800  | -1.69593200 | 0.95089800  |
| H | 3.85292900  | 0.23858000  | 0.60111000  |
| C | 4.58326500  | -3.07528300 | 0.77842100  |
| H | 3.36468400  | -4.65032900 | -0.05041700 |
| H | 5.58122600  | -1.29002700 | 1.46228100  |
| H | 5.34844000  | -3.74862700 | 1.15241300  |
| C | 0.22879300  | -0.76727700 | -0.77759500 |
| P | -0.91728800 | -2.09139600 | -0.16915900 |
| C | -2.00043700 | -0.70970800 | -0.70333700 |
| C | -3.41049500 | -0.40216300 | -0.59091100 |
| C | -4.33625600 | -1.40474200 | -0.24614300 |
| C | -3.87822000 | 0.91349000  | -0.79115600 |
| C | -5.69124800 | -1.10751500 | -0.12738100 |
| H | -3.98557300 | -2.41634300 | -0.06278400 |
| C | -5.23293800 | 1.20499400  | -0.67165100 |
| H | -3.16683200 | 1.70298900  | -1.01342500 |
| C | -6.14449100 | 0.19599700  | -0.34337600 |
| H | -6.39415500 | -1.89117700 | 0.13876900  |
| H | -5.58031800 | 2.22233600  | -0.82554500 |
| H | -7.20095100 | 0.42772000  | -0.24694500 |
| C | -0.93558900 | 0.01477400  | -1.16232600 |

|   |             |             |             |
|---|-------------|-------------|-------------|
| C | -1.07909200 | -3.40317300 | -1.44060700 |
| H | -2.06874400 | -3.85825000 | -1.34307900 |
| H | -0.96786900 | -2.98943300 | -2.44547200 |
| H | -0.32844100 | -4.17781700 | -1.26822800 |
| O | -0.87956000 | -2.61678500 | 1.23101200  |
| H | -0.93110800 | 0.98135100  | -1.65587000 |
| C | 1.92470800  | 1.00220800  | -0.94119100 |
| C | 0.49706400  | 1.77206100  | 0.92314000  |
| C | 0.04629200  | 0.82199400  | 3.06561500  |
| C | -1.27049100 | 1.25605100  | 2.92015800  |
| C | -1.61704700 | 1.94284000  | 1.75731400  |
| N | -0.75721600 | 2.18737400  | 0.76084200  |
| H | 0.35787300  | 0.27329600  | 3.94822500  |
| H | -2.01607200 | 1.05897200  | 3.68272000  |
| H | -2.63614700 | 2.28705300  | 1.60094200  |
| N | 1.39532000  | 2.03421700  | -0.17915600 |
| C | 2.80454700  | 1.28621400  | -1.95263100 |
| H | 3.21528200  | 0.46837300  | -2.53083900 |
| C | 1.74373000  | 3.41697900  | -0.37038400 |
| C | 2.63570900  | 3.65570900  | -1.48781300 |
| H | 2.88925800  | 4.69383300  | -1.66670700 |
| C | 3.14857500  | 2.63625900  | -2.23271700 |
| H | 3.83091200  | 2.85032300  | -3.05106300 |
| O | 1.31423800  | 4.27188800  | 0.39244500  |
| C | 0.96115400  | 1.10220700  | 2.05370100  |
| H | 1.99481700  | 0.78478200  | 2.11870700  |

Zero-point correction=

0.412492 (Hartree/Particle)

|                                              |              |
|----------------------------------------------|--------------|
| Thermal correction to Energy=                | 0.439598     |
| Thermal correction to Enthalpy=              | 0.440542     |
| Thermal correction to Gibbs Free Energy=     | 0.352430     |
| Sum of electronic and zero-point Energies=   | -1642.486702 |
| Sum of electronic and thermal Energies=      | -1642.459596 |
| Sum of electronic and thermal Enthalpies=    | -1642.458652 |
| Sum of electronic and thermal Free Energies= | -1642.546764 |

E(RB3LYP) = -1642.899194 A.U.

### HOAc

0 1

Number of imaginary frequencies: 0

|   |             |             |             |
|---|-------------|-------------|-------------|
| H | 1.70162000  | -0.81898900 | 0.00042000  |
| C | 0.09213200  | 0.12640300  | -0.00029600 |
| O | 0.76202500  | -1.05257400 | 0.00000000  |
| O | 0.65508800  | 1.19679100  | 0.00006300  |
| C | -1.38740500 | -0.09831600 | -0.00001000 |
| H | -1.67975500 | -0.67717300 | 0.87889100  |
| H | -1.90755100 | 0.85720300  | -0.00312000 |
| H | -1.67958300 | -0.68329900 | -0.87486300 |

|                                              |                             |
|----------------------------------------------|-----------------------------|
| Zero-point correction=                       | 0.062248 (Hartree/Particle) |
| Thermal correction to Energy=                | 0.066832                    |
| Thermal correction to Enthalpy=              | 0.067776                    |
| Thermal correction to Gibbs Free Energy=     | 0.034868                    |
| Sum of electronic and zero-point Energies=   | -229.004490                 |
| Sum of electronic and thermal Energies=      | -228.999906                 |
| Sum of electronic and thermal Enthalpies=    | -228.998962                 |
| Sum of electronic and thermal Free Energies= | -229.031870                 |

E(RM06L) = -229.066738 A.U.

**A-1**

1 1

Number of imaginary frequencies: 0

|   |             |             |             |
|---|-------------|-------------|-------------|
| C | -0.42020500 | -0.83158900 | -1.65436200 |
| C | -1.20041800 | -1.85556200 | -1.04948300 |
| C | -2.57256700 | -1.41117100 | -1.00268700 |
| C | -2.63881600 | -0.12706500 | -1.65243500 |
| C | -1.31335400 | 0.25619700  | -2.00781700 |
| O | -1.62938700 | -0.93884400 | 1.82799500  |
| O | -2.85817100 | 0.70617700  | 1.14305000  |
| C | -2.57158200 | -0.11808600 | 2.07814400  |
| C | -3.71421100 | -2.16674300 | -0.42555600 |
| H | -4.14903700 | -2.84445400 | -1.16855400 |
| H | -3.39891200 | -2.77560900 | 0.42569800  |
| H | -4.51120500 | -1.49794000 | -0.09056100 |
| C | -0.70272400 | -3.12207100 | -0.46084400 |
| H | -1.08630300 | -3.26102800 | 0.55480200  |
| H | -1.04847600 | -3.97399000 | -1.05677100 |
| H | 0.38710400  | -3.15184500 | -0.41917900 |
| C | 1.02367700  | -0.89512300 | -1.99273900 |
| H | 1.58695600  | -1.54002500 | -1.31405500 |
| H | 1.13802400  | -1.30033300 | -3.00503900 |
| H | 1.49708100  | 0.09003900  | -1.99323800 |
| C | -0.89819600 | 1.51845900  | -2.67250500 |
| H | 0.09689600  | 1.83778600  | -2.34957900 |
| H | -0.85277300 | 1.38206400  | -3.75870600 |

|   |             |             |             |
|---|-------------|-------------|-------------|
| H | -1.59515400 | 2.33696100  | -2.47708700 |
| C | -3.86276500 | 0.69895500  | -1.78196900 |
| H | -3.63302300 | 1.74458600  | -1.99614200 |
| H | -4.48242200 | 0.32225300  | -2.60312300 |
| H | -4.46635100 | 0.66278600  | -0.87173000 |
| C | 4.18082400  | 0.74805400  | -0.34393400 |
| C | 3.24175600  | -0.02210700 | 0.33815900  |
| C | 3.50605300  | -1.36019400 | 0.71309500  |
| C | 4.74712200  | -1.93160400 | 0.41620200  |
| C | 5.69034300  | -1.16641400 | -0.25365700 |
| C | 5.40517400  | 0.15180300  | -0.63043400 |
| H | 3.98218500  | 1.77469700  | -0.61874200 |
| H | 4.96208700  | -2.95584100 | 0.70584800  |
| H | 6.66097500  | -1.59112700 | -0.48908400 |
| H | 6.15957000  | 0.73283700  | -1.15149400 |
| C | 1.38767200  | -0.89391300 | 1.34800100  |
| H | 0.40593100  | -0.86465000 | 1.79126200  |
| C | 2.33014300  | -1.87077800 | 1.35812500  |
| H | 2.21325100  | -2.84492300 | 1.81293800  |
| N | 1.90879100  | 0.25109200  | 0.72765000  |
| C | 1.21675700  | 1.42308800  | 0.53558000  |
| N | -0.14822300 | 1.39580000  | 0.53583800  |
| C | -0.76034000 | 2.60124300  | 0.52655100  |
| C | -0.07001700 | 3.79328000  | 0.43540200  |
| C | 1.31126100  | 3.68878700  | 0.28528000  |
| N | 1.94643000  | 2.52650900  | 0.35069000  |
| H | -1.84491400 | 2.57069700  | 0.56921300  |

|                                              |              |             |                             |
|----------------------------------------------|--------------|-------------|-----------------------------|
| H                                            | -0.58721000  | 4.74419300  | 0.43284400                  |
| H                                            | 1.93337700   | 4.56491100  | 0.11244700                  |
| Co                                           | -1.43706300  | -0.10325500 | 0.00299700                  |
| C                                            | -3.32213800  | -0.14424800 | 3.35795600                  |
| H                                            | -3.75893500  | 0.83027600  | 3.57457100                  |
| H                                            | -4.13882100  | -0.86818800 | 3.27457700                  |
| H                                            | -2.67842600  | -0.46790800 | 4.17592200                  |
| Zero-point correction=                       |              |             | 0.465277 (Hartree/Particle) |
| Thermal correction to Energy=                |              |             | 0.495196                    |
| Thermal correction to Enthalpy=              |              |             | 0.496140                    |
| Thermal correction to Gibbs Free Energy=     |              |             | 0.404774                    |
| Sum of electronic and zero-point Energies=   |              |             | -1390.756594                |
| Sum of electronic and thermal Energies=      |              |             | -1390.726674                |
| Sum of electronic and thermal Enthalpies=    |              |             | -1390.725730                |
| Sum of electronic and thermal Free Energies= |              |             | -1390.817097                |
| E(RM06L) =                                   | -1391.221871 | A.U.        |                             |

### A-3a

1 1

Number of imaginary frequencies: 0

|   |             |             |             |
|---|-------------|-------------|-------------|
| C | -2.95519000 | -1.44152600 | -0.00007400 |
| C | -2.98639900 | -0.02086800 | -0.00001100 |
| C | -4.17320300 | 0.69674400  | -0.00009800 |
| C | -5.35337800 | -0.04692300 | -0.00024300 |
| C | -5.35163400 | -1.45116000 | -0.00030400 |
| C | -4.16168700 | -2.15951300 | -0.00023100 |
| C | -1.59003200 | -1.83999700 | 0.00007500  |
| C | -0.76869400 | -0.71820600 | 0.00015500  |

|   |             |             |             |
|---|-------------|-------------|-------------|
| H | -4.18036000 | 1.77902100  | -0.00005900 |
| H | -6.30244500 | 0.48017300  | -0.00030900 |
| H | -6.29717100 | -1.98315400 | -0.00041000 |
| H | -4.15613900 | -3.24517300 | -0.00027200 |
| H | -1.24428200 | -2.86537300 | 0.00009700  |
| C | -1.10346900 | 1.63736800  | -0.00009100 |
| N | -1.86119300 | 2.72892300  | -0.00008800 |
| C | -1.21225300 | 3.89255400  | -0.00017800 |
| C | 0.18020900  | 3.98841900  | -0.00018900 |
| C | 0.88552500  | 2.79960800  | -0.00026600 |
| N | 0.26469600  | 1.60678000  | -0.00027500 |
| H | -1.83492900 | 4.78442100  | -0.00013700 |
| H | 0.68938700  | 4.94341600  | -0.00017000 |
| H | 1.97163900  | 2.77093400  | -0.00033800 |
| N | -1.65093600 | 0.39161700  | 0.00009100  |
| C | 1.95635800  | -1.98690700 | -0.00027400 |
| C | 2.31819300  | -1.21521900 | -1.15332000 |
| C | 2.95892500  | 0.00241700  | -0.70814500 |
| C | 2.95797300  | 0.00212300  | 0.70970000  |
| C | 2.31669700  | -1.21575600 | 1.15358300  |
| C | 2.08633600  | -1.59247500 | 2.56955400  |
| H | 1.22824400  | -2.25866200 | 2.68033300  |
| H | 2.96306700  | -2.11749500 | 2.96877800  |
| H | 1.92238400  | -0.71710700 | 3.20274700  |
| C | 1.39093600  | -3.36022100 | -0.00100000 |
| H | 0.78045300  | -3.55095400 | -0.88690900 |
| H | 2.19951800  | -4.09943800 | -0.00144500 |

|                                              |              |             |                             |
|----------------------------------------------|--------------|-------------|-----------------------------|
| H                                            | 0.78058700   | -3.55192300 | 0.88478700                  |
| C                                            | 2.08942700   | -1.59112500 | -2.56975700                 |
| H                                            | 1.92426400   | -0.71549100 | -3.20228900                 |
| H                                            | 2.96741500   | -2.11409700 | -2.96891000                 |
| H                                            | 1.23266900   | -2.25882200 | -2.68169100                 |
| C                                            | 3.47569600   | 1.05922700  | -1.61867000                 |
| H                                            | 3.82462600   | 1.94029600  | -1.07530800                 |
| H                                            | 4.32534000   | 0.68406300  | -2.19902200                 |
| H                                            | 2.71971800   | 1.38538500  | -2.34068400                 |
| C                                            | 3.47338700   | 1.05866000  | 1.62129800                  |
| H                                            | 4.32205100   | 0.68326400  | 2.20292900                  |
| H                                            | 3.82323200   | 1.93982500  | 1.07868400                  |
| H                                            | 2.71627900   | 1.38472200  | 2.34217100                  |
| Co                                           | 1.02793100   | -0.19897800 | -0.00036100                 |
| Zero-point correction=                       |              |             | 0.400896 (Hartree/Particle) |
| Thermal correction to Energy=                |              |             | 0.425428                    |
| Thermal correction to Enthalpy=              |              |             | 0.426372                    |
| Thermal correction to Gibbs Free Energy=     |              |             | 0.347648                    |
| Sum of electronic and zero-point Energies=   |              |             | -1161.701802                |
| Sum of electronic and thermal Energies=      |              |             | -1161.677269                |
| Sum of electronic and thermal Enthalpies=    |              |             | -1161.676325                |
| Sum of electronic and thermal Free Energies= |              |             | -1161.755049                |
| E(RM06L) =                                   | -1162.102697 | A.U.        |                             |

### A-3b

1 1

Number of imaginary frequencies: 0

|   |            |             |            |
|---|------------|-------------|------------|
| C | 1.93976400 | -1.64362800 | 0.01245100 |
|---|------------|-------------|------------|

|   |             |             |             |
|---|-------------|-------------|-------------|
| C | 2.62332800  | -0.64542300 | -0.72902300 |
| C | 3.96593200  | -0.38408800 | -0.53908300 |
| C | 4.65502800  | -1.21459500 | 0.34966300  |
| C | 4.00487200  | -2.22221000 | 1.07486600  |
| C | 2.63835100  | -2.42799300 | 0.93761600  |
| C | 0.56290300  | -1.54778400 | -0.35981200 |
| C | 0.45399600  | -0.67772700 | -1.46138400 |
| H | 4.46001900  | 0.42131700  | -1.07259500 |
| H | 5.72296200  | -1.07149700 | 0.48327600  |
| H | 4.57931700  | -2.84345400 | 1.75378200  |
| H | 2.12599500  | -3.20161200 | 1.50078200  |
| H | -0.13346900 | -0.72901900 | -2.36976000 |
| C | 1.46429300  | 1.29151000  | -0.68102700 |
| N | 2.22725000  | 2.34599800  | -0.88642900 |
| C | 2.12458600  | 3.35159300  | -0.00725200 |
| C | 1.28310700  | 3.29303400  | 1.09576000  |
| C | 0.50172400  | 2.15493200  | 1.22579100  |
| N | 0.55648800  | 1.15076800  | 0.33554900  |
| H | 2.74830900  | 4.22096700  | -0.20084800 |
| H | 1.23075000  | 4.09301900  | 1.82402200  |
| H | -0.18486600 | 2.01961600  | 2.05703700  |
| N | 1.67866600  | 0.13376800  | -1.49869300 |
| C | -2.49690100 | -1.16251000 | 0.81260000  |
| C | -2.44288300 | 0.20393200  | 1.19996600  |
| C | -2.43198200 | 1.00561300  | -0.00561800 |
| C | -2.50044400 | 0.13258700  | -1.12699000 |
| C | -2.48415800 | -1.21638000 | -0.63690200 |

|                                            |             |             |                             |
|--------------------------------------------|-------------|-------------|-----------------------------|
| C                                          | -2.55467000 | -2.44954100 | -1.46415800                 |
| H                                          | -2.11335600 | -3.30610300 | -0.95017100                 |
| H                                          | -3.59533300 | -2.70330100 | -1.69439100                 |
| H                                          | -2.03494300 | -2.33401200 | -2.41947400                 |
| C                                          | -2.55275000 | -2.32758000 | 1.73176400                  |
| H                                          | -2.04708800 | -2.12393500 | 2.67844500                  |
| H                                          | -3.59619600 | -2.56970000 | 1.96747500                  |
| H                                          | -2.10233100 | -3.21908100 | 1.29171500                  |
| C                                          | -2.47245300 | 0.70341200  | 2.60313600                  |
| H                                          | -2.27581400 | 1.77652500  | 2.66485600                  |
| H                                          | -3.46129300 | 0.54270700  | 3.04666400                  |
| H                                          | -1.75096200 | 0.18693500  | 3.24362800                  |
| C                                          | -2.41822600 | 2.48996400  | -0.08403600                 |
| H                                          | -1.77626600 | 2.85090000  | -0.89407400                 |
| H                                          | -3.42623800 | 2.87105000  | -0.28179800                 |
| H                                          | -2.08122300 | 2.95550000  | 0.84507700                  |
| C                                          | -2.55208300 | 0.55615200  | -2.55028600                 |
| H                                          | -3.57411100 | 0.83966800  | -2.82594700                 |
| H                                          | -1.91723800 | 1.42556900  | -2.74464300                 |
| H                                          | -2.25292500 | -0.24425100 | -3.23134500                 |
| Co                                         | -0.80179800 | -0.32782100 | 0.04766800                  |
| Zero-point correction=                     |             |             | 0.398248 (Hartree/Particle) |
| Thermal correction to Energy=              |             |             | 0.422994                    |
| Thermal correction to Enthalpy=            |             |             | 0.423939                    |
| Thermal correction to Gibbs Free Energy=   |             |             | 0.345048                    |
| Sum of electronic and zero-point Energies= |             |             | -1161.604661                |
| Sum of electronic and thermal Energies=    |             |             | -1161.579915                |

Sum of electronic and thermal Enthalpies= -1161.578971

Sum of electronic and thermal Free Energies= -1161.657861

E(RM06L) = -1162.002909 A.U.

**A-4**

1 1

Number of imaginary frequencies: 0

|   |             |             |             |
|---|-------------|-------------|-------------|
| C | -4.40950400 | -0.34042500 | -0.97681900 |
| C | -5.68571900 | 0.22056600  | -0.72973900 |
| C | -5.83874600 | 1.61627600  | -0.64177300 |
| C | -6.80779700 | -0.61259300 | -0.57195900 |
| C | -7.09205700 | 2.16141500  | -0.40191100 |
| H | -4.96987900 | 2.25603100  | -0.76868600 |
| C | -8.05531700 | -0.05414500 | -0.33232500 |
| H | -6.68564500 | -1.68869300 | -0.64365600 |
| C | -8.20020900 | 1.32965000  | -0.24716700 |
| H | -7.20741600 | 3.23894000  | -0.33863100 |
| H | -8.91923300 | -0.70044000 | -0.21392300 |
| H | -9.17906300 | 1.76112100  | -0.06200700 |
| C | -3.30901800 | -0.82382600 | -1.19933900 |
| P | -1.72393100 | -1.49979000 | -1.43899600 |
| C | -0.55099300 | 0.80667700  | -0.17181100 |
| C | -0.55820900 | 2.20205900  | 0.03122800  |
| C | 0.38281200  | 3.03277400  | -0.60992300 |
| C | -1.56564700 | 2.78026300  | 0.83153800  |
| C | 0.32844000  | 4.40646900  | -0.42829000 |
| H | 1.14676100  | 2.58726500  | -1.23872400 |
| C | -1.61265800 | 4.15601100  | 0.99867800  |

|   |             |             |             |
|---|-------------|-------------|-------------|
| H | -2.31103000 | 2.13792800  | 1.29366500  |
| C | -0.66154400 | 4.96773200  | 0.37826300  |
| H | 1.06053100  | 5.04099900  | -0.91790300 |
| H | -2.39093100 | 4.59908600  | 1.61178900  |
| H | -0.69864700 | 6.04388400  | 0.51768700  |
| C | -0.71396000 | -0.40740300 | -0.42920800 |
| C | -1.24169500 | -1.06935100 | -3.12532300 |
| H | -1.39116600 | -0.00484700 | -3.31732800 |
| H | -0.18752000 | -1.31784000 | -3.27621800 |
| H | -1.84351900 | -1.65079000 | -3.82692300 |
| O | -1.57921400 | -2.94971200 | -1.09300400 |
| C | 3.65347100  | 2.20397100  | 0.14457100  |
| C | 3.89293000  | 1.26530000  | -0.88559400 |
| C | 4.85326800  | 1.45883500  | -1.87226000 |
| C | 5.58521500  | 2.64241500  | -1.81396700 |
| C | 5.36085500  | 3.59224100  | -0.80980100 |
| C | 4.39961800  | 3.38566600  | 0.17289100  |
| C | 2.59645800  | 1.68413100  | 0.97372400  |
| C | 2.18573600  | 0.48120500  | 0.47471100  |
| H | 5.02042700  | 0.72185500  | -2.64733600 |
| H | 6.34504100  | 2.82942800  | -2.56621300 |
| H | 5.95036900  | 4.50402100  | -0.79909100 |
| H | 4.23147300  | 4.12508700  | 0.95119300  |
| H | 2.16986700  | 2.19349500  | 1.82889400  |
| C | 2.76717400  | -0.93131200 | -1.35818400 |
| N | 3.49940400  | -1.23988900 | -2.42861900 |
| C | 3.21020600  | -2.39399700 | -3.02630700 |

|   |             |             |             |
|---|-------------|-------------|-------------|
| C | 2.19554200  | -3.24341600 | -2.59045000 |
| C | 1.47242600  | -2.83601500 | -1.47972600 |
| N | 1.75228000  | -1.68632000 | -0.84577200 |
| H | 3.81595100  | -2.64196700 | -3.89579800 |
| H | 1.96260100  | -4.17209000 | -3.09554600 |
| H | 0.62113300  | -3.39541700 | -1.10441000 |
| N | 2.98319100  | 0.21720800  | -0.66733500 |
| C | 1.55694500  | -0.94405300 | 2.77073400  |
| C | 0.16333400  | -0.63936900 | 2.70128000  |
| C | -0.51641200 | -1.78717000 | 2.13562300  |
| C | 0.45643900  | -2.75020200 | 1.78430900  |
| C | 1.75573400  | -2.20084100 | 2.11491400  |
| C | 3.06755800  | -2.87112300 | 1.91943900  |
| H | 3.86775500  | -2.14369800 | 1.75680100  |
| H | 3.33802800  | -3.46278300 | 2.80157000  |
| H | 3.05258400  | -3.55297700 | 1.06519300  |
| C | 2.59813600  | -0.16791500 | 3.48788200  |
| H | 2.75314400  | -0.62449800 | 4.47290200  |
| H | 3.55649500  | -0.16729600 | 2.96613600  |
| H | 2.30229500  | 0.86914500  | 3.65197800  |
| C | -0.49056300 | 0.56741800  | 3.27069200  |
| H | -1.50528400 | 0.69033600  | 2.88640700  |
| H | -0.56500700 | 0.49097400  | 4.36168800  |
| H | 0.06587000  | 1.48273400  | 3.04503200  |
| C | -1.98870800 | -1.92802700 | 2.00132000  |
| H | -2.25587700 | -2.69328200 | 1.26974100  |
| H | -2.42381200 | -2.20822000 | 2.96769600  |

|                                              |              |             |                             |
|----------------------------------------------|--------------|-------------|-----------------------------|
| H                                            | -2.46235900  | -0.98896800 | 1.69728400                  |
| C                                            | 0.19513200   | -4.12524200 | 1.28435300                  |
| H                                            | -0.05907000  | -4.77652100 | 2.12881500                  |
| H                                            | -0.63759800  | -4.15195700 | 0.57738600                  |
| H                                            | 1.07683000   | -4.56230400 | 0.80910100                  |
| Co                                           | 0.88638600   | -0.91178100 | 0.78988300                  |
| Zero-point correction=                       |              |             | 0.649192 (Hartree/Particle) |
| Thermal correction to Energy=                |              |             | 0.692201                    |
| Thermal correction to Enthalpy=              |              |             | 0.693145                    |
| Thermal correction to Gibbs Free Energy=     |              |             | 0.572431                    |
| Sum of electronic and zero-point Energies=   |              |             | -2233.539577                |
| Sum of electronic and thermal Energies=      |              |             | -2233.496568                |
| Sum of electronic and thermal Enthalpies=    |              |             | -2233.495624                |
| Sum of electronic and thermal Free Energies= |              |             | -2233.616338                |
| E(RM06L) =                                   | -2234.188769 | A.U.        |                             |

**(S) A-5a**

1 1

Number of imaginary frequencies: 0

|   |             |             |             |
|---|-------------|-------------|-------------|
| C | -4.34772100 | -0.17468100 | -0.46113400 |
| C | -5.59196300 | -0.06729700 | 0.20621000  |
| C | -6.25268600 | 1.17168000  | 0.28270600  |
| C | -6.17264900 | -1.19960100 | 0.80514000  |
| C | -7.46878600 | 1.26989500  | 0.94378300  |
| H | -5.80181000 | 2.04371800  | -0.18257700 |
| C | -7.38945700 | -1.08859200 | 1.46323800  |
| H | -5.66142200 | -2.15585100 | 0.73920700  |
| C | -8.03890000 | 0.14287200  | 1.53388600  |

|   |             |             |             |
|---|-------------|-------------|-------------|
| H | -7.97610000 | 2.22805100  | 0.99773900  |
| H | -7.83562300 | -1.96619800 | 1.92052600  |
| H | -8.99172100 | 0.22406000  | 2.04785400  |
| C | -3.26937700 | -0.26992000 | -1.02929200 |
| P | -1.69658700 | -0.43731600 | -1.77375000 |
| C | 0.11000600  | 1.20550600  | -0.21231600 |
| C | -0.36235100 | 2.59192600  | -0.36062100 |
| C | 0.54704500  | 3.65516200  | -0.46876300 |
| C | -1.73704200 | 2.87496400  | -0.38988100 |
| C | 0.09442400  | 4.95756100  | -0.63988500 |
| H | 1.61648500  | 3.45656900  | -0.43349400 |
| C | -2.18591900 | 4.17949100  | -0.55577600 |
| H | -2.45018100 | 2.06338300  | -0.25656300 |
| C | -1.27283900 | 5.22418100  | -0.68671400 |
| H | 0.81029300  | 5.76827900  | -0.73609500 |
| H | -3.25274000 | 4.38415300  | -0.56691400 |
| H | -1.62463300 | 6.24355700  | -0.81170600 |
| C | -0.48423100 | 0.04231300  | -0.55021900 |
| C | -1.66381000 | 0.79858700  | -3.09546700 |
| H | -1.92449300 | 1.79875100  | -2.74521900 |
| H | -0.65824400 | 0.82263100  | -3.52451200 |
| H | -2.36698000 | 0.49118100  | -3.87205500 |
| O | -1.38201900 | -1.82325600 | -2.27297600 |
| C | 3.19516600  | 1.65173600  | 1.79462000  |
| C | 3.72886600  | 1.24518600  | 0.54130900  |
| C | 5.10244000  | 1.19454500  | 0.29945300  |
| C | 5.93372900  | 1.59574300  | 1.33433700  |

|   |             |             |             |
|---|-------------|-------------|-------------|
| C | 5.42798500  | 2.02400500  | 2.57894600  |
| C | 4.06932200  | 2.05520800  | 2.82119900  |
| C | 1.79249200  | 1.49723800  | 1.72519200  |
| C | 1.44070200  | 0.99071900  | 0.47978800  |
| H | 5.49360300  | 0.89100700  | -0.66431800 |
| H | 7.00769700  | 1.59042700  | 1.17603800  |
| H | 6.12225200  | 2.33358500  | 3.35313500  |
| H | 3.67683100  | 2.37774200  | 3.78089500  |
| H | 1.07007100  | 1.79287300  | 2.47642800  |
| C | 2.73718800  | 0.10390900  | -1.42232800 |
| N | 3.65838400  | 0.36920600  | -2.33456100 |
| C | 3.60865700  | -0.37844200 | -3.44293900 |
| C | 2.61826500  | -1.33150300 | -3.66334400 |
| C | 1.71761100  | -1.56156000 | -2.63353900 |
| N | 1.81479600  | -0.88039000 | -1.47870400 |
| H | 4.38049400  | -0.18326400 | -4.18357100 |
| H | 2.55630700  | -1.88642300 | -4.59120500 |
| H | 0.89412900  | -2.26870800 | -2.69601200 |
| N | 2.66430600  | 0.87312900  | -0.26621500 |
| C | 1.63879100  | -2.01121600 | 1.94478000  |
| C | 0.20957400  | -1.75598700 | 2.04860000  |
| C | -0.44918800 | -2.53179600 | 1.04749800  |
| C | 0.56125300  | -3.16661000 | 0.25184200  |
| C | 1.85431000  | -2.85519200 | 0.83804100  |
| C | 3.17474100  | -3.30711000 | 0.32240100  |
| H | 3.96495700  | -2.58399100 | 0.54893600  |
| H | 3.47068000  | -4.26241800 | 0.76977600  |

|                                              |              |             |                             |
|----------------------------------------------|--------------|-------------|-----------------------------|
| H                                            | 3.15763200   | -3.45550900 | -0.76168200                 |
| C                                            | 2.69886100   | -1.47873700 | 2.84121200                  |
| H                                            | 3.04747700   | -2.26881400 | 3.51588400                  |
| H                                            | 3.57505000   | -1.12335400 | 2.28784800                  |
| H                                            | 2.34358000   | -0.65220500 | 3.45961500                  |
| C                                            | -0.47387100  | -0.92540500 | 3.07722000                  |
| H                                            | -1.26344500  | -0.31071000 | 2.63278400                  |
| H                                            | -0.94459800  | -1.55397600 | 3.84161000                  |
| H                                            | 0.22214400   | -0.25718800 | 3.58946600                  |
| C                                            | -1.91568700  | -2.69052400 | 0.88020700                  |
| H                                            | -2.18605300  | -2.85610800 | -0.16556300                 |
| H                                            | -2.25695200  | -3.55724400 | 1.45952200                  |
| H                                            | -2.46411600  | -1.81759400 | 1.24300300                  |
| C                                            | 0.30862500   | -4.11048100 | -0.86585900                 |
| H                                            | 0.01726700   | -5.08957500 | -0.46625000                 |
| H                                            | -0.50113500  | -3.75387200 | -1.50840300                 |
| H                                            | 1.20207900   | -4.27308400 | -1.47485200                 |
| Co                                           | 0.81897500   | -1.14919800 | 0.20911000                  |
| Zero-point correction=                       |              |             | 0.651106 (Hartree/Particle) |
| Thermal correction to Energy=                |              |             | 0.692598                    |
| Thermal correction to Enthalpy=              |              |             | 0.693542                    |
| Thermal correction to Gibbs Free Energy=     |              |             | 0.579140                    |
| Sum of electronic and zero-point Energies=   |              |             | -2233.550353                |
| Sum of electronic and thermal Energies=      |              |             | -2233.508861                |
| Sum of electronic and thermal Enthalpies=    |              |             | -2233.507917                |
| Sum of electronic and thermal Free Energies= |              |             | -2233.622319                |
| E(RM06L) =                                   | -2234.201459 | A.U.        |                             |

(T) A-5a

13

Number of imaginary frequencies: 0

|   |             |             |             |
|---|-------------|-------------|-------------|
| C | 4.17829000  | -0.03028000 | 0.36295200  |
| C | 5.45394900  | -0.03153700 | -0.25029400 |
| C | 6.16467200  | 1.17224300  | -0.40637000 |
| C | 6.01678200  | -1.23418200 | -0.71495400 |
| C | 7.41165700  | 1.16682400  | -1.01457000 |
| H | 5.72719100  | 2.09823400  | -0.04488100 |
| C | 7.26483500  | -1.22597700 | -1.32135800 |
| H | 5.46936500  | -2.16375300 | -0.58774000 |
| C | 7.96317100  | -0.02897300 | -1.47227800 |
| H | 7.95711100  | 2.09787600  | -1.13155800 |
| H | 7.69669500  | -2.15662500 | -1.67564000 |
| H | 8.93987600  | -0.02816200 | -1.94612300 |
| C | 3.07087000  | -0.02877700 | 0.88260200  |
| P | 1.46576200  | -0.01319600 | 1.55529800  |
| C | -0.40789200 | 1.59090800  | 0.07361400  |
| C | 0.19726100  | 2.92492600  | 0.26464200  |
| C | -0.57220400 | 4.02317200  | 0.67774000  |
| C | 1.57628200  | 3.10282500  | 0.06894900  |
| C | 0.02751800  | 5.25411600  | 0.91702000  |
| H | -1.64209200 | 3.90049500  | 0.82488900  |
| C | 2.17178200  | 4.33595600  | 0.30572100  |
| H | 2.17162400  | 2.26697400  | -0.29478400 |
| C | 1.39999600  | 5.41402700  | 0.73555100  |
| H | -0.57832200 | 6.09220900  | 1.24804800  |

|   |             |             |             |
|---|-------------|-------------|-------------|
| H | 3.23766200  | 4.46211700  | 0.13876300  |
| H | 1.86421900  | 6.37858000  | 0.91688000  |
| C | 0.24874600  | 0.43966100  | 0.36776700  |
| C | 1.53987700  | 1.11376600  | 2.96302700  |
| H | 1.91290100  | 2.09547600  | 2.66263600  |
| H | 0.53447000  | 1.22573400  | 3.37744200  |
| H | 2.19750900  | 0.69627600  | 3.72844700  |
| O | 0.96694900  | -1.41907900 | 1.93610500  |
| C | -3.59105700 | 1.84072700  | -1.79857600 |
| C | -3.87104100 | 0.77962900  | -0.91186500 |
| C | -5.08645300 | 0.10071400  | -0.92697600 |
| C | -6.02432100 | 0.49575900  | -1.87284800 |
| C | -5.75876100 | 1.53757800  | -2.77574300 |
| C | -4.55045600 | 2.21512300  | -2.74918500 |
| C | -2.27764000 | 2.30447700  | -1.49439100 |
| C | -1.74832400 | 1.53047100  | -0.49847300 |
| H | -5.30288900 | -0.69694900 | -0.22358600 |
| H | -6.98210400 | -0.01322700 | -1.91203000 |
| H | -6.51552100 | 1.81538700  | -3.50233100 |
| H | -4.34752600 | 3.02153600  | -3.44723400 |
| H | -1.73836200 | 3.10447000  | -1.98466300 |
| C | -2.84838700 | -0.02252000 | 1.15800800  |
| N | -3.91773100 | 0.28883900  | 1.88031900  |
| C | -4.00315200 | -0.25657300 | 3.09540600  |
| C | -3.01283500 | -1.08242000 | 3.62218900  |
| C | -1.94212900 | -1.37413500 | 2.79493100  |
| N | -1.88095500 | -0.87854500 | 1.54731900  |

|   |             |             |             |
|---|-------------|-------------|-------------|
| H | -4.89186100 | -0.00328800 | 3.66943000  |
| H | -3.07821700 | -1.49174500 | 4.62275500  |
| H | -1.10845700 | -2.00821700 | 3.08407900  |
| N | -2.72711100 | 0.54242900  | -0.12789000 |
| C | -1.51670100 | -2.77049500 | -0.99469600 |
| C | -0.77619700 | -1.88511800 | -1.82613700 |
| C | 0.62487600  | -2.03849400 | -1.49328500 |
| C | 0.74343000  | -3.07033100 | -0.51337000 |
| C | -0.57497700 | -3.46846000 | -0.15061800 |
| C | -0.92424500 | -4.46489400 | 0.89728600  |
| H | -1.94050100 | -4.31917100 | 1.27488100  |
| H | -0.87471800 | -5.48726100 | 0.50550800  |
| H | -0.23434600 | -4.41350000 | 1.74519400  |
| C | -2.99521800 | -2.94436500 | -0.97671700 |
| H | -3.29471900 | -3.84895600 | -1.51740900 |
| H | -3.38383900 | -3.04460600 | 0.04338800  |
| H | -3.50678900 | -2.09962800 | -1.44740300 |
| C | -1.30837000 | -0.96162200 | -2.86306500 |
| H | -0.75383700 | -0.01855600 | -2.88397900 |
| H | -1.22112500 | -1.40750500 | -3.86105700 |
| H | -2.36440300 | -0.72442900 | -2.70352900 |
| C | 1.73953300  | -1.33605400 | -2.18351500 |
| H | 2.67810200  | -1.42413600 | -1.63226600 |
| H | 1.89798500  | -1.76024700 | -3.18195700 |
| H | 1.52873900  | -0.27003100 | -2.31392900 |
| C | 2.00913600  | -3.56008300 | 0.08921800  |
| H | 2.43660200  | -4.37194000 | -0.51145700 |

|                                              |              |             |                             |
|----------------------------------------------|--------------|-------------|-----------------------------|
| H                                            | 2.75620000   | -2.76409000 | 0.15463800                  |
| H                                            | 1.85415300   | -3.93842400 | 1.10117800                  |
| Co                                           | -0.48948400  | -1.33648500 | 0.19943800                  |
| Zero-point correction=                       |              |             | 0.648826 (Hartree/Particle) |
| Thermal correction to Energy=                |              |             | 0.691705                    |
| Thermal correction to Enthalpy=              |              |             | 0.692649                    |
| Thermal correction to Gibbs Free Energy=     |              |             | 0.570862                    |
| Sum of electronic and zero-point Energies=   |              |             | -2233.567611                |
| Sum of electronic and thermal Energies=      |              |             | -2233.524733                |
| Sum of electronic and thermal Enthalpies=    |              |             | -2233.523788                |
| Sum of electronic and thermal Free Energies= |              |             | -2233.645576                |
| E(RM06L) =                                   | -2234.216438 | A.U.        |                             |

**(S)A-5b**

1 1

Number of imaginary frequencies: 0

|   |             |            |             |
|---|-------------|------------|-------------|
| C | -3.05790400 | 2.22890900 | 0.25525700  |
| C | -4.36501600 | 1.88633400 | -0.16899000 |
| C | -5.24318400 | 1.23738000 | 0.71726700  |
| C | -4.77901000 | 2.14310000 | -1.48849900 |
| C | -6.50816800 | 0.85978900 | 0.28805700  |
| H | -4.91678000 | 1.03566400 | 1.73317900  |
| C | -6.04725800 | 1.76248700 | -1.90534800 |
| H | -4.09867900 | 2.64607800 | -2.16994800 |
| C | -6.91300900 | 1.12089300 | -1.02013600 |
| H | -7.18296200 | 0.36192500 | 0.97789700  |
| H | -6.36510900 | 1.97120900 | -2.92237800 |
| H | -7.90570600 | 0.82894400 | -1.34943200 |

|   |             |             |             |
|---|-------------|-------------|-------------|
| C | -1.93060500 | 2.52242400  | 0.63087700  |
| P | -0.25624000 | 2.43397600  | 1.13379200  |
| C | 1.73312600  | 1.01276500  | -0.30094000 |
| C | 2.87853200  | 1.89367700  | -0.29016800 |
| C | 2.99451500  | 2.92359100  | -1.23951600 |
| C | 3.92580900  | 1.70236700  | 0.62721800  |
| C | 4.11870300  | 3.74086100  | -1.26049800 |
| H | 2.19198000  | 3.06826700  | -1.95988700 |
| C | 5.03928200  | 2.53335500  | 0.61352200  |
| H | 3.83884500  | 0.91245600  | 1.37033000  |
| C | 5.14288700  | 3.55069700  | -0.33475900 |
| H | 4.19482700  | 4.53194300  | -2.00055700 |
| H | 5.82978300  | 2.38834900  | 1.34389400  |
| H | 6.01805700  | 4.19244300  | -0.35090000 |
| C | 0.43034600  | 1.21731800  | -0.05163900 |
| C | 0.47513700  | 4.04814300  | 0.80320700  |
| H | 1.54437800  | 4.02105600  | 1.02272700  |
| H | 0.32478700  | 4.35422300  | -0.23423000 |
| H | 0.00294200  | 4.77785700  | 1.46424200  |
| O | -0.05436400 | 1.90937100  | 2.52671000  |
| C | -2.47227600 | -0.91782700 | -0.79418400 |
| C | -2.17658300 | -1.26652300 | 0.55461700  |
| C | -3.01445200 | -2.08730500 | 1.30970900  |
| C | -4.17554700 | -2.53025900 | 0.69243500  |
| C | -4.50125800 | -2.18097200 | -0.63414300 |
| C | -3.66313500 | -1.38052500 | -1.38424600 |
| C | -1.40940900 | -0.11896200 | -1.26946000 |

|   |             |             |             |
|---|-------------|-------------|-------------|
| C | -0.44724000 | 0.00932700  | -0.26671000 |
| H | -2.77903600 | -2.33377000 | 2.33796200  |
| H | -4.86168800 | -3.15597400 | 1.25525200  |
| H | -5.43079200 | -2.54098400 | -1.06338200 |
| H | -3.91451000 | -1.10252000 | -2.40368800 |
| H | -1.35945400 | 0.39564200  | -2.22117100 |
| C | -0.10030400 | -0.99495400 | 1.91226000  |
| N | -0.59209900 | -1.28252800 | 3.10666200  |
| C | 0.30476800  | -1.45515800 | 4.07709800  |
| C | 1.67615300  | -1.33172600 | 3.86420800  |
| C | 2.08752200  | -1.12092700 | 2.55916400  |
| N | 1.20710400  | -0.99174200 | 1.55585400  |
| H | -0.09333600 | -1.69663400 | 5.05971800  |
| H | 2.39263800  | -1.43166600 | 4.66958800  |
| H | 3.13813700  | -1.08053900 | 2.28236000  |
| N | -0.95852700 | -0.69159800 | 0.86955800  |
| C | 1.10817000  | -2.60402000 | -1.61717200 |
| C | 1.65092900  | -1.49485900 | -2.38320400 |
| C | 2.95566400  | -1.19825000 | -1.87637000 |
| C | 3.17317300  | -2.02545300 | -0.72913000 |
| C | 2.03342900  | -2.92212900 | -0.60363400 |
| C | 1.85937900  | -3.95997600 | 0.44708100  |
| H | 0.80388900  | -4.12063100 | 0.68772900  |
| H | 2.26668200  | -4.92244700 | 0.11791000  |
| H | 2.37719300  | -3.69596600 | 1.37408600  |
| C | -0.19963600 | -3.27612600 | -1.84504100 |
| H | -0.86065300 | -2.68347200 | -2.48052400 |

|                                              |              |             |                             |
|----------------------------------------------|--------------|-------------|-----------------------------|
| H                                            | -0.05338000  | -4.24428600 | -2.33681800                 |
| H                                            | -0.73490200  | -3.47081000 | -0.90914800                 |
| C                                            | 1.03499500   | -0.85082700 | -3.57526800                 |
| H                                            | 1.15620400   | 0.23716700  | -3.55048000                 |
| H                                            | 1.50617900   | -1.20716200 | -4.49838900                 |
| H                                            | -0.03311100  | -1.06733600 | -3.64913000                 |
| C                                            | 3.92286000   | -0.23141100 | -2.45417400                 |
| H                                            | 4.58044000   | 0.20194900  | -1.69557400                 |
| H                                            | 4.55790200   | -0.74084100 | -3.18821300                 |
| H                                            | 3.42313100   | 0.59266700  | -2.96923300                 |
| C                                            | 4.42274600   | -2.06532400 | 0.07691200                  |
| H                                            | 5.20514100   | -2.62462600 | -0.44972400                 |
| H                                            | 4.81908200   | -1.06069300 | 0.25974500                  |
| H                                            | 4.27771600   | -2.56193100 | 1.04002600                  |
| Co                                           | 1.51994600   | -0.89179600 | -0.45010700                 |
| Zero-point correction=                       |              |             | 0.649309 (Hartree/Particle) |
| Thermal correction to Energy=                |              |             | 0.691833                    |
| Thermal correction to Enthalpy=              |              |             | 0.692777                    |
| Thermal correction to Gibbs Free Energy=     |              |             | 0.574431                    |
| Sum of electronic and zero-point Energies=   |              |             | -2233.552645                |
| Sum of electronic and thermal Energies=      |              |             | -2233.510120                |
| Sum of electronic and thermal Enthalpies=    |              |             | -2233.509176                |
| Sum of electronic and thermal Free Energies= |              |             | -2233.627522                |
| E(RM06L) =                                   | -2234.201953 | A.U.        |                             |

**A-5c**

1 1

Number of imaginary frequencies: 0

|   |             |             |             |
|---|-------------|-------------|-------------|
| C | -2.79010900 | -0.91338000 | -1.02759400 |
| C | -4.07614900 | -0.44061000 | -1.32895700 |
| C | -4.22266200 | 0.73050000  | -2.10625700 |
| C | -5.22639300 | -1.12510500 | -0.87932700 |
| C | -5.48949100 | 1.20305700  | -2.41001600 |
| H | -3.33245400 | 1.23707100  | -2.46831500 |
| C | -6.48621000 | -0.64011000 | -1.18920200 |
| H | -5.10916500 | -2.03392300 | -0.29507800 |
| C | -6.61834400 | 0.52241300  | -1.95138000 |
| H | -5.60213200 | 2.09902500  | -3.01174500 |
| H | -7.36967500 | -1.16720300 | -0.84412200 |
| H | -7.60830400 | 0.89587000  | -2.19507100 |
| C | -1.62771900 | -1.25120800 | -0.73874900 |
| P | -0.14167200 | -2.07477700 | -1.36340300 |
| C | 0.88934500  | -1.19724400 | -0.19517500 |
| C | 3.12185700  | -1.29367800 | -1.40468100 |
| C | 4.03378900  | -0.41225900 | -2.00808700 |
| C | 3.11859300  | -2.63581600 | -1.80537800 |
| C | 4.89389500  | -0.86004900 | -3.00238500 |
| H | 4.04723200  | 0.63723900  | -1.71931100 |
| C | 3.97777600  | -3.08118300 | -2.80109200 |
| H | 2.44778300  | -3.33368400 | -1.31002500 |
| C | 4.86667800  | -2.19425200 | -3.40361000 |
| H | 5.58132600  | -0.16368400 | -3.47249700 |
| H | 3.96151600  | -4.12453800 | -3.09976200 |
| H | 5.54053100  | -2.54243500 | -4.17997700 |
| C | 2.16265100  | -0.82021400 | -0.39389700 |

|   |             |             |             |
|---|-------------|-------------|-------------|
| C | -0.37542400 | -3.77159000 | -0.76631800 |
| H | -0.48801700 | -3.79925800 | 0.31859000  |
| H | -1.26777200 | -4.19083900 | -1.23605800 |
| H | 0.48338900  | -4.37890200 | -1.06124000 |
| O | 0.08299400  | -1.95633100 | -2.83319400 |
| C | -0.56628300 | 3.22477800  | -0.69952400 |
| C | 0.80250000  | 3.17072600  | -0.37442000 |
| C | 1.66558600  | 4.22728600  | -0.63597900 |
| C | 1.11915100  | 5.37406500  | -1.20916600 |
| C | -0.24179600 | 5.45560000  | -1.51939700 |
| C | -1.09168200 | 4.38388600  | -1.27513200 |
| C | -1.14045600 | 1.95797500  | -0.34927800 |
| C | -0.18492100 | 1.11638300  | 0.14093400  |
| H | 2.71909200  | 4.18440300  | -0.39164200 |
| H | 1.76821700  | 6.21965500  | -1.41252300 |
| H | -0.63472800 | 6.36512800  | -1.96309500 |
| H | -2.14543100 | 4.43740000  | -1.53480600 |
| H | -2.18993200 | 1.69902700  | -0.41822600 |
| C | 2.25071500  | 1.48166900  | 0.63778000  |
| N | 2.98176100  | 2.42503500  | 1.24318700  |
| C | 4.14728800  | 2.11123500  | 1.77966600  |
| C | 4.65742700  | 0.80574500  | 1.77506200  |
| C | 3.92212700  | -0.12533700 | 1.09434000  |
| N | 2.73784300  | 0.19226600  | 0.49815100  |
| H | 4.69574700  | 2.92869300  | 2.24351800  |
| H | 5.59280500  | 0.54064400  | 2.24990800  |
| H | 4.23320200  | -1.15543100 | 0.95807900  |

|    |             |             |            |
|----|-------------|-------------|------------|
| N  | 1.04991600  | 1.85185300  | 0.11827200 |
| C  | -0.92397300 | 0.37074500  | 2.76223400 |
| C  | -2.04441300 | -0.39604000 | 2.37113000 |
| C  | -1.63009500 | -1.78586200 | 2.29074200 |
| C  | -0.25358800 | -1.86277500 | 2.60284800 |
| C  | 0.21060000  | -0.51842400 | 2.85055000 |
| C  | 1.53754800  | -0.17632800 | 3.42701100 |
| H  | 1.84641900  | 0.84768600  | 3.19687800 |
| H  | 1.50029900  | -0.25024300 | 4.52126000 |
| H  | 2.31788700  | -0.86526100 | 3.09266700 |
| C  | -0.90254400 | 1.82963200  | 3.04871700 |
| H  | -1.67933700 | 2.36241400  | 2.49557600 |
| H  | -1.07130900 | 2.00734000  | 4.11706600 |
| H  | 0.05720300  | 2.28709600  | 2.78905500 |
| C  | -3.42865900 | 0.10970300  | 2.16413900 |
| H  | -4.03266500 | -0.59165000 | 1.58258900 |
| H  | -3.94128700 | 0.26317000  | 3.12096600 |
| H  | -3.43663100 | 1.07004400  | 1.63785700 |
| C  | -2.55481200 | -2.91302300 | 1.99343800 |
| H  | -2.04087300 | -3.87637500 | 1.96628900 |
| H  | -3.32969100 | -2.97877000 | 2.76499100 |
| H  | -3.06452900 | -2.77915600 | 1.03299600 |
| C  | 0.60252600  | -3.07755000 | 2.70737900 |
| H  | 0.96044200  | -3.21214700 | 3.73412100 |
| H  | 0.06416900  | -3.98845000 | 2.43610300 |
| H  | 1.48648800  | -3.01052600 | 2.06159500 |
| Co | -0.50041800 | -0.57968000 | 0.93951500 |

|                                              |                             |
|----------------------------------------------|-----------------------------|
| Zero-point correction=                       | 0.649462 (Hartree/Particle) |
| Thermal correction to Energy=                | 0.691534                    |
| Thermal correction to Enthalpy=              | 0.692478                    |
| Thermal correction to Gibbs Free Energy=     | 0.575691                    |
| Sum of electronic and zero-point Energies=   | -2233.509458                |
| Sum of electronic and thermal Energies=      | -2233.467386                |
| Sum of electronic and thermal Enthalpies=    | -2233.466442                |
| Sum of electronic and thermal Free Energies= | -2233.583230                |

E(RM06L) = -2234.158920 A.U.

### A-5d

1 1

Number of imaginary frequencies: 0

|   |             |             |             |
|---|-------------|-------------|-------------|
| C | -3.09431000 | 1.73296200  | -0.76850900 |
| C | -4.23384900 | 0.96312600  | -1.10605400 |
| C | -5.45937000 | 1.17836700  | -0.45019300 |
| C | -4.14113000 | -0.03021300 | -2.09667500 |
| C | -6.56684900 | 0.41253900  | -0.78586900 |
| H | -5.52708100 | 1.94962500  | 0.31080000  |
| C | -5.25631200 | -0.78825900 | -2.42304400 |
| H | -3.18965300 | -0.19916000 | -2.59296600 |
| C | -6.46847800 | -0.56962100 | -1.77080000 |
| H | -7.51249800 | 0.58498800  | -0.28133000 |
| H | -5.17796100 | -1.55788800 | -3.18510600 |
| H | -7.33897300 | -1.16426000 | -2.03136300 |
| C | -2.11249400 | 2.41162700  | -0.49996900 |
| P | -0.65145400 | 3.22551500  | -0.00043000 |
| C | 1.26019300  | 1.06540900  | -0.17910800 |

|   |             |             |             |
|---|-------------|-------------|-------------|
| C | 1.94894300  | 1.15901600  | -1.44347800 |
| C | 1.71085800  | 0.15714300  | -2.42325000 |
| C | 3.00658300  | 2.08318100  | -1.65848800 |
| C | 2.52429000  | 0.09194400  | -3.56546600 |
| H | 0.82357200  | -0.46114500 | -2.35043300 |
| C | 3.76382100  | 2.02118100  | -2.80832000 |
| H | 3.19170900  | 2.85009500  | -0.91007500 |
| C | 3.53705000  | 1.01331000  | -3.76353000 |
| H | 2.31908000  | -0.66432800 | -4.31769300 |
| H | 4.54470200  | 2.75700300  | -2.97759300 |
| H | 4.14277800  | 0.97625600  | -4.66347500 |
| C | 0.37235900  | 1.79773900  | 0.49390600  |
| C | 0.08002900  | 3.88898600  | -1.50539500 |
| H | 1.05817500  | 4.32124900  | -1.28621900 |
| H | 0.17781800  | 3.12903900  | -2.28356100 |
| H | -0.57495500 | 4.68342200  | -1.86871700 |
| O | -0.81410900 | 4.17960700  | 1.14366600  |
| C | -1.70974200 | -2.40945200 | -0.52485600 |
| C | -2.00633100 | -1.58943800 | 0.58125100  |
| C | -3.26517800 | -1.57319400 | 1.17194600  |
| C | -4.22512100 | -2.43984100 | 0.65690000  |
| C | -3.94030100 | -3.28547400 | -0.42091400 |
| C | -2.69056400 | -3.27076900 | -1.02617900 |
| C | -0.35717500 | -2.12979800 | -0.91132300 |
| C | 0.18477200  | -1.16575000 | -0.10723800 |
| H | -3.49827800 | -0.92721900 | 2.00901500  |
| H | -5.21503100 | -2.45179700 | 1.10232300  |

|   |             |             |             |
|---|-------------|-------------|-------------|
| H | -4.71271300 | -3.95073000 | -0.79563300 |
| H | -2.47566300 | -3.91046700 | -1.87753900 |
| H | 0.19414400  | -2.64226300 | -1.69193300 |
| C | -0.77219700 | 0.07145700  | 1.87686700  |
| N | -1.40731800 | -0.25044900 | 3.00293300  |
| C | -1.34505200 | 0.56877700  | 4.04314300  |
| C | -0.60585100 | 1.75352500  | 4.03623700  |
| C | 0.00318500  | 2.08900900  | 2.85275700  |
| N | -0.08975700 | 1.27107600  | 1.76596800  |
| H | -1.89700200 | 0.25617700  | 4.92721100  |
| H | -0.53405300 | 2.40244900  | 4.89884600  |
| H | 0.54932100  | 3.00864100  | 2.68610500  |
| N | -0.84720000 | -0.79733500 | 0.82564100  |
| C | 2.54913900  | -2.38374300 | 0.90255100  |
| C | 3.42620300  | -2.17940100 | -0.18237700 |
| C | 4.10892000  | -0.91544000 | 0.02855700  |
| C | 3.64102400  | -0.33794000 | 1.23531400  |
| C | 2.62499900  | -1.21046800 | 1.76273700  |
| C | 1.95819000  | -1.08622700 | 3.08527400  |
| H | 0.99321800  | -1.59971500 | 3.10880200  |
| H | 2.57850300  | -1.54496100 | 3.86512300  |
| H | 1.80721800  | -0.04250900 | 3.37783200  |
| C | 1.71122400  | -3.58191200 | 1.16551400  |
| H | 1.46754800  | -4.12034400 | 0.24723600  |
| H | 2.24792100  | -4.27444200 | 1.82428900  |
| H | 0.76710300  | -3.32663700 | 1.65382800  |
| C | 3.66009800  | -3.09090200 | -1.33528400 |

|                                              |              |             |                             |
|----------------------------------------------|--------------|-------------|-----------------------------|
| H                                            | 3.80693400   | -2.53495400 | -2.26631100                 |
| H                                            | 4.55951800   | -3.69829700 | -1.18035100                 |
| H                                            | 2.82532800   | -3.78033300 | -1.48311100                 |
| C                                            | 5.17269800   | -0.38592600 | -0.86241100                 |
| H                                            | 5.40700600   | 0.65963000  | -0.65332000                 |
| H                                            | 6.09404900   | -0.96433400 | -0.72723900                 |
| H                                            | 4.89958100   | -0.46452100 | -1.91905600                 |
| C                                            | 4.08529600   | 0.94982900  | 1.83386800                  |
| H                                            | 4.92259600   | 0.79784200  | 2.52405800                  |
| H                                            | 4.42088100   | 1.65631100  | 1.06923000                  |
| H                                            | 3.28215300   | 1.43078200  | 2.39986100                  |
| Co                                           | 2.02926600   | -0.61029600 | -0.05980600                 |
| Zero-point correction=                       |              |             | 0.649776 (Hartree/Particle) |
| Thermal correction to Energy=                |              |             | 0.691888                    |
| Thermal correction to Enthalpy=              |              |             | 0.692832                    |
| Thermal correction to Gibbs Free Energy=     |              |             | 0.575672                    |
| Sum of electronic and zero-point Energies=   |              |             | -2233.506832                |
| Sum of electronic and thermal Energies=      |              |             | -2233.464720                |
| Sum of electronic and thermal Enthalpies=    |              |             | -2233.463776                |
| Sum of electronic and thermal Free Energies= |              |             | -2233.580936                |
| E(RM06L) =                                   | -2234.156608 | A.U.        |                             |

## A-6

1 1

Number of imaginary frequencies: 0

|   |             |             |             |
|---|-------------|-------------|-------------|
| C | -0.47358200 | -1.73088700 | -0.38834200 |
| C | -1.56009700 | -1.60558500 | -1.38963800 |
| C | -1.52165700 | -0.58885500 | -2.35390500 |

|   |             |             |             |
|---|-------------|-------------|-------------|
| C | -2.66960400 | -2.45814200 | -1.35390100 |
| C | -2.57654400 | -0.40967700 | -3.24033700 |
| H | -0.66923200 | 0.08743600  | -2.36906700 |
| C | -3.71424400 | -2.29302800 | -2.25567200 |
| H | -2.69760800 | -3.25778800 | -0.61733200 |
| C | -3.67704600 | -1.26326100 | -3.19401800 |
| H | -2.54107600 | 0.39717200  | -3.96792600 |
| H | -4.56372400 | -2.96890100 | -2.22348700 |
| H | -4.49991800 | -1.13014100 | -3.88993700 |
| C | -0.72204700 | -2.08130500 | 0.87768100  |
| P | -1.44954300 | -2.58421600 | 2.22498100  |
| C | -2.37420800 | 1.13891900  | 0.40381600  |
| C | -1.14484600 | 1.29416400  | 0.46667500  |
| C | -1.87021700 | -1.22938300 | 3.34575100  |
| H | -1.26853300 | -1.28477300 | 4.25570000  |
| H | -1.72585800 | -0.27191200 | 2.83674300  |
| H | -2.91843700 | -1.32924900 | 3.63809900  |
| O | -1.64510000 | -3.96195800 | 2.76343900  |
| C | 2.78395800  | -1.92327900 | -2.06557200 |
| C | 3.16778200  | -1.64529400 | -0.73070600 |
| C | 4.50250400  | -1.60773400 | -0.33240700 |
| C | 5.45943400  | -1.87104500 | -1.30569200 |
| C | 5.10188400  | -2.15589600 | -2.63468300 |
| C | 3.77341800  | -2.18573300 | -3.02461300 |
| C | 1.36547100  | -1.83921500 | -2.12434500 |
| C | 0.88794700  | -1.51071700 | -0.87399300 |
| H | 4.78166400  | -1.42454300 | 0.69930800  |

|   |            |             |             |
|---|------------|-------------|-------------|
| H | 6.50807700 | -1.87298900 | -1.02540500 |
| H | 5.88142000 | -2.36239700 | -3.36082100 |
| H | 3.49731600 | -2.40619400 | -4.05133500 |
| H | 0.73492500 | -2.09315700 | -2.96560700 |
| C | 1.95843100 | -0.92867500 | 1.30309000  |
| N | 2.70099100 | -1.58214100 | 2.18879700  |
| C | 2.57633200 | -1.22443400 | 3.46567700  |
| C | 1.67713800 | -0.24344800 | 3.87954100  |
| C | 1.01600500 | 0.44853800  | 2.87938900  |
| N | 1.19822800 | 0.16136700  | 1.57777500  |
| H | 3.20578200 | -1.75513400 | 4.17641200  |
| H | 1.52831400 | 0.00042800  | 4.92442900  |
| H | 0.34126700 | 1.27528300  | 3.08788300  |
| N | 2.00224800 | -1.35875500 | -0.01597100 |
| C | 2.54044900 | 2.39010500  | 0.08712800  |
| C | 2.01456200 | 2.16620700  | -1.20997300 |
| C | 0.73203200 | 2.83773100  | -1.30470000 |
| C | 0.49855300 | 3.51710800  | -0.07397800 |
| C | 1.59316000 | 3.19780600  | 0.81403400  |
| C | 1.75072500 | 3.68911700  | 2.20560700  |
| H | 2.35582700 | 3.01246200  | 2.81509400  |
| H | 2.26003600 | 4.66050500  | 2.20867700  |
| H | 0.78647800 | 3.83308100  | 2.70030800  |
| C | 3.81521000 | 1.85713700  | 0.63640500  |
| H | 4.15731200 | 0.97333300  | 0.09041700  |
| H | 4.60922100 | 2.60886900  | 0.57210100  |
| H | 3.72057800 | 1.58509700  | 1.69300800  |

|                                 |             |             |                             |
|---------------------------------|-------------|-------------|-----------------------------|
| C                               | 2.64659600  | 1.39873700  | -2.30887500                 |
| H                               | 1.93056000  | 0.74529600  | -2.81660500                 |
| H                               | 3.03843400  | 2.09243900  | -3.06252700                 |
| H                               | 3.47895700  | 0.78106600  | -1.96515200                 |
| C                               | -0.16150400 | 2.86777300  | -2.49314200                 |
| H                               | -1.20825900 | 2.72129500  | -2.20787600                 |
| H                               | -0.08804300 | 3.83380800  | -3.00550800                 |
| H                               | 0.10147800  | 2.09409100  | -3.21825900                 |
| C                               | -0.65533200 | 4.39787800  | 0.23464400                  |
| H                               | -0.41197000 | 5.43157400  | -0.03750100                 |
| H                               | -1.54397300 | 4.10249300  | -0.32614500                 |
| H                               | -0.91050700 | 4.38617100  | 1.29607900                  |
| Co                              | 0.64615300  | 1.52671000  | 0.23923500                  |
| C                               | -3.75071800 | 0.87527900  | 0.25040200                  |
| C                               | -4.29984000 | -0.34432100 | 0.69902700                  |
| C                               | -4.59486800 | 1.80599500  | -0.39240300                 |
| C                               | -5.64536400 | -0.61927200 | 0.51507700                  |
| H                               | -3.63541400 | -1.07371700 | 1.15544300                  |
| C                               | -5.94022000 | 1.52522200  | -0.56892100                 |
| H                               | -4.17295900 | 2.74339700  | -0.74522300                 |
| C                               | -6.46823300 | 0.31466000  | -0.11537600                 |
| H                               | -6.05635000 | -1.56482200 | 0.85573800                  |
| H                               | -6.58378000 | 2.24714100  | -1.06191500                 |
| H                               | -7.52301100 | 0.09857300  | -0.25610800                 |
| Zero-point correction=          |             |             | 0.648045 (Hartree/Particle) |
| Thermal correction to Energy=   |             |             | 0.691405                    |
| Thermal correction to Enthalpy= |             |             | 0.692349                    |

|                                              |              |
|----------------------------------------------|--------------|
| Thermal correction to Gibbs Free Energy=     | 0.572301     |
| Sum of electronic and zero-point Energies=   | -2233.488267 |
| Sum of electronic and thermal Energies=      | -2233.444907 |
| Sum of electronic and thermal Enthalpies=    | -2233.443963 |
| Sum of electronic and thermal Free Energies= | -2233.564012 |

E(RM06L) = -2234.136313 A.U.

### A-7

1 1

Number of imaginary frequencies: 0

|   |             |             |             |
|---|-------------|-------------|-------------|
| C | -1.60220300 | 1.50082700  | 0.15133000  |
| C | -2.44290600 | 2.71949400  | 0.03601400  |
| C | -2.16707300 | 3.68095600  | -0.94691800 |
| C | -3.50812200 | 2.94913600  | 0.91933700  |
| C | -2.92394800 | 4.84294600  | -1.03894300 |
| H | -1.37631900 | 3.48843300  | -1.66857700 |
| C | -4.25514100 | 4.11816200  | 0.83508800  |
| H | -3.72957400 | 2.21345100  | 1.68775100  |
| C | -3.96564200 | 5.06837700  | -0.14191400 |
| H | -2.70810500 | 5.56850200  | -1.81759400 |
| H | -5.06298600 | 4.29068500  | 1.53955000  |
| H | -4.55339000 | 5.97865900  | -0.20754300 |
| C | -0.24108300 | 1.73175000  | 0.16151500  |
| P | 0.88254000  | 3.05878400  | 0.24598200  |
| C | 2.13054400  | 0.35231300  | 0.22558100  |
| C | 3.49767600  | 0.55168400  | 0.63666600  |
| C | 3.95156800  | 1.77066400  | 1.18672700  |
| C | 4.40525700  | -0.52280000 | 0.56030700  |

|   |             |             |             |
|---|-------------|-------------|-------------|
| C | 5.27041400  | 1.90580200  | 1.59376800  |
| H | 3.26115100  | 2.59960400  | 1.32416300  |
| C | 5.72086400  | -0.38504700 | 0.97751200  |
| H | 4.04411000  | -1.47071200 | 0.16947100  |
| C | 6.16100700  | 0.83607500  | 1.48642400  |
| H | 5.60557300  | 2.85010000  | 2.01177200  |
| H | 6.40406100  | -1.22645400 | 0.90967300  |
| H | 7.18993900  | 0.95016400  | 1.81346000  |
| C | 1.11398300  | 1.25602400  | 0.18440800  |
| C | 1.33167200  | 3.80952400  | -1.33458200 |
| H | 2.41546500  | 3.94675800  | -1.36415100 |
| H | 1.01797800  | 3.18754500  | -2.17428600 |
| H | 0.86345900  | 4.79377500  | -1.40757400 |
| O | 1.22234600  | 3.87924700  | 1.44904900  |
| C | -4.06255700 | -1.21125800 | -0.05616700 |
| C | -3.00076200 | -1.87817600 | 0.59648400  |
| C | -3.10193000 | -3.20426000 | 1.01236000  |
| C | -4.28914000 | -3.86782400 | 0.73370200  |
| C | -5.34705800 | -3.23255400 | 0.05748500  |
| C | -5.24735700 | -1.91225300 | -0.34065600 |
| C | -3.63283400 | 0.11687600  | -0.27644700 |
| C | -2.33595800 | 0.26437600  | 0.19393500  |
| H | -2.29493400 | -3.69985900 | 1.54381600  |
| H | -4.40299200 | -4.90066700 | 1.04736700  |
| H | -6.25556600 | -3.79007200 | -0.14549900 |
| H | -6.06696000 | -1.41913600 | -0.85411100 |
| H | -4.19109800 | 0.90660200  | -0.75883500 |

|   |             |             |             |
|---|-------------|-------------|-------------|
| C | -0.91688200 | -1.25930700 | 1.64528900  |
| N | -1.33835700 | -1.47341100 | 2.88749500  |
| C | -0.42309300 | -1.81752000 | 3.79327200  |
| C | 0.92308500  | -1.95252700 | 3.46899300  |
| C | 1.27430500  | -1.68745000 | 2.15895900  |
| N | 0.35883000  | -1.34946400 | 1.22401800  |
| H | -0.78579900 | -1.97898600 | 4.80593300  |
| H | 1.66984400  | -2.23176800 | 4.20206600  |
| H | 2.30389700  | -1.73373400 | 1.81539100  |
| N | -1.91642100 | -0.99925400 | 0.68684000  |
| C | -0.10953300 | -1.57863600 | -2.24677600 |
| C | 0.96516600  | -0.70055300 | -2.63160400 |
| C | 2.21940100  | -1.28110100 | -2.24351100 |
| C | 1.92024900  | -2.47971500 | -1.52093800 |
| C | 0.47746000  | -2.65451700 | -1.54207300 |
| C | -0.22510300 | -3.81110600 | -0.92986500 |
| H | -1.29653700 | -3.63039900 | -0.81990800 |
| H | -0.10328700 | -4.70196800 | -1.55682800 |
| H | 0.18337800  | -4.06310400 | 0.05467800  |
| C | -1.54111100 | -1.39206700 | -2.59977000 |
| H | -1.84312500 | -0.34198600 | -2.54539900 |
| H | -1.72810800 | -1.72794600 | -3.62662900 |
| H | -2.20550600 | -1.96219400 | -1.94528800 |
| C | 0.78732200  | 0.59013900  | -3.34630900 |
| H | 1.68327000  | 1.21302300  | -3.28762400 |
| H | 0.57478000  | 0.41771700  | -4.40792800 |
| H | -0.06006900 | 1.15607800  | -2.94132500 |

|                                              |              |             |                             |
|----------------------------------------------|--------------|-------------|-----------------------------|
| C                                            | 3.55532100   | -0.73126700 | -2.60214400                 |
| H                                            | 4.36934900   | -1.27070000 | -2.11523500                 |
| H                                            | 3.71263000   | -0.80088400 | -3.68402700                 |
| H                                            | 3.65485900   | 0.32309300  | -2.32535900                 |
| C                                            | 2.87208700   | -3.49382000 | -0.99031100                 |
| H                                            | 2.78633200   | -4.43114400 | -1.55260000                 |
| H                                            | 3.91079100   | -3.16597900 | -1.06964600                 |
| H                                            | 2.67659100   | -3.74280500 | 0.05863600                  |
| Co                                           | 1.04311200   | -0.88232400 | -0.61243400                 |
| Zero-point correction=                       |              |             | 0.650196 (Hartree/Particle) |
| Thermal correction to Energy=                |              |             | 0.692075                    |
| Thermal correction to Enthalpy=              |              |             | 0.693019                    |
| Thermal correction to Gibbs Free Energy=     |              |             | 0.576307                    |
| Sum of electronic and zero-point Energies=   |              |             | -2233.531917                |
| Sum of electronic and thermal Energies=      |              |             | -2233.490038                |
| Sum of electronic and thermal Enthalpies=    |              |             | -2233.489094                |
| Sum of electronic and thermal Free Energies= |              |             | -2233.605806                |
| E(RM06L) =                                   | -2234.182114 | A.U.        |                             |

**(S)A-8**

1 1

Number of imaginary frequencies: 0

|   |             |            |             |
|---|-------------|------------|-------------|
| C | -1.77449300 | 1.40652900 | 0.02574400  |
| C | -2.67222800 | 2.54270300 | -0.21232300 |
| C | -2.38088600 | 3.46222600 | -1.24749300 |
| C | -3.76848100 | 2.79899700 | 0.62454200  |
| C | -3.14205900 | 4.62327500 | -1.40385600 |
| H | -1.66156400 | 3.18376200 | -2.01530000 |

|   |             |             |             |
|---|-------------|-------------|-------------|
| C | -4.51526600 | 3.95854300  | 0.46638000  |
| H | -3.99442400 | 2.10343300  | 1.42761000  |
| C | -4.19823700 | 4.87688200  | -0.53945100 |
| H | -2.92152100 | 5.30824900  | -2.21633000 |
| H | -5.34089600 | 4.16045000  | 1.14155900  |
| H | -4.79091400 | 5.77875800  | -0.65532900 |
| C | -0.40371600 | 1.65306300  | 0.00913900  |
| P | 0.14255000  | 3.36896900  | -0.03919900 |
| C | 1.95747800  | 0.48831500  | 0.15598300  |
| C | 3.23298800  | 0.96321100  | 0.60789900  |
| C | 3.36474600  | 2.22079300  | 1.23929700  |
| C | 4.37879300  | 0.15228200  | 0.49424800  |
| C | 4.60056800  | 2.65062500  | 1.70323700  |
| H | 2.48506100  | 2.83918400  | 1.40316900  |
| C | 5.61271000  | 0.59068900  | 0.95010700  |
| H | 4.26621800  | -0.83027600 | 0.04308000  |
| C | 5.72884300  | 1.84501100  | 1.55090500  |
| H | 4.68318900  | 3.61630100  | 2.19257100  |
| H | 6.48671600  | -0.04565900 | 0.84762900  |
| H | 6.69327800  | 2.18675000  | 1.91381200  |
| C | 0.69150100  | 0.78765300  | -0.03353900 |
| C | 1.42130900  | 3.59387000  | -1.30339700 |
| H | 2.39881800  | 3.28686900  | -0.91375800 |
| H | 1.18545800  | 3.01549000  | -2.19940600 |
| H | 1.47537100  | 4.65537500  | -1.55186100 |
| O | 0.35325200  | 4.16812400  | 1.20670800  |
| C | -3.82822900 | -1.62817700 | 0.13289500  |

|   |             |             |             |
|---|-------------|-------------|-------------|
| C | -2.64351900 | -2.06059100 | 0.77772400  |
| C | -2.48535900 | -3.35641900 | 1.26699100  |
| C | -3.53303000 | -4.24169500 | 1.05497900  |
| C | -4.70547300 | -3.84705900 | 0.38166000  |
| C | -4.86651000 | -2.55271000 | -0.07733400 |
| C | -3.64270300 | -0.26182600 | -0.18147600 |
| C | -2.37673900 | 0.12401300  | 0.24058400  |
| H | -1.58306700 | -3.66372900 | 1.79003400  |
| H | -3.44712900 | -5.26127400 | 1.41753800  |
| H | -5.49740100 | -4.57356400 | 0.23181900  |
| H | -5.77723500 | -2.25045300 | -0.58531300 |
| H | -4.32606900 | 0.38192100  | -0.71822700 |
| C | -0.69297200 | -1.05317000 | 1.74807200  |
| N | -0.99518300 | -0.73314500 | 2.99681500  |
| C | -0.04562700 | -0.94719600 | 3.91383700  |
| C | 1.17621100  | -1.53116600 | 3.59600900  |
| C | 1.41207800  | -1.78908500 | 2.25444700  |
| N | 0.48866300  | -1.52797500 | 1.31401100  |
| H | -0.28410200 | -0.64681400 | 4.93146600  |
| H | 1.92778100  | -1.73711600 | 4.34834200  |
| H | 2.36292200  | -2.17199000 | 1.89238000  |
| N | -1.74122500 | -1.00373500 | 0.79448100  |
| C | 0.05436100  | -2.08970700 | -2.05016400 |
| C | 0.77181100  | -0.97421600 | -2.57061500 |
| C | 2.17893200  | -1.15793500 | -2.29338800 |
| C | 2.33307200  | -2.39335500 | -1.58665300 |
| C | 1.01541900  | -2.93498600 | -1.40340400 |

|                                            |             |             |                             |
|--------------------------------------------|-------------|-------------|-----------------------------|
| C                                          | 0.71138500  | -4.20628100 | -0.69185400                 |
| H                                          | -0.31340300 | -4.22303600 | -0.30981700                 |
| H                                          | 0.82133200  | -5.06198800 | -1.36799800                 |
| H                                          | 1.39160200  | -4.37703500 | 0.14837300                  |
| C                                          | -1.39857100 | -2.35117000 | -2.23043000                 |
| H                                          | -1.99932100 | -1.44566200 | -2.09612200                 |
| H                                          | -1.59974900 | -2.72335300 | -3.24242900                 |
| H                                          | -1.77376400 | -3.10280500 | -1.53154700                 |
| C                                          | 0.16483600  | 0.17347400  | -3.29739000                 |
| H                                          | 0.83558600  | 1.03684800  | -3.32086400                 |
| H                                          | -0.05383600 | -0.09320800 | -4.33800900                 |
| H                                          | -0.78040100 | 0.48503800  | -2.83773700                 |
| C                                          | 3.25966600  | -0.24705900 | -2.76203800                 |
| H                                          | 4.20820300  | -0.43692800 | -2.25515100                 |
| H                                          | 3.42877800  | -0.36866700 | -3.83791600                 |
| H                                          | 3.00763300  | 0.80473400  | -2.59105600                 |
| C                                          | 3.60222200  | -3.08026400 | -1.21580000                 |
| H                                          | 3.76794800  | -3.96170400 | -1.84686100                 |
| H                                          | 4.47215000  | -2.43153700 | -1.34491900                 |
| H                                          | 3.60246300  | -3.43563600 | -0.17967700                 |
| Co                                         | 1.10538000  | -1.04721400 | -0.56077900                 |
| Zero-point correction=                     |             |             | 0.649106 (Hartree/Particle) |
| Thermal correction to Energy=              |             |             | 0.691442                    |
| Thermal correction to Enthalpy=            |             |             | 0.692386                    |
| Thermal correction to Gibbs Free Energy=   |             |             | 0.574566                    |
| Sum of electronic and zero-point Energies= |             |             | -2233.532214                |
| Sum of electronic and thermal Energies=    |             |             | -2233.489878                |

Sum of electronic and thermal Enthalpies= -2233.488934

Sum of electronic and thermal Free Energies= -2233.606754

E(RM06L) = -2234.181320 A.U.

**(T)A-8**

1 3

Number of imaginary frequencies: 0

|   |             |            |             |
|---|-------------|------------|-------------|
| C | -2.06093400 | 1.08353600 | 0.03799600  |
| C | -3.29542100 | 1.88060700 | -0.09751900 |
| C | -3.46347500 | 2.75377000 | -1.18439500 |
| C | -4.31599000 | 1.79226600 | 0.86061600  |
| C | -4.61235600 | 3.52878100 | -1.30231000 |
| H | -2.70314700 | 2.77962500 | -1.96312600 |
| C | -5.45765000 | 2.57607200 | 0.74691400  |
| H | -4.19055300 | 1.12421400 | 1.70874600  |
| C | -5.60841600 | 3.44519400 | -0.33294500 |
| H | -4.73412500 | 4.18873300 | -2.15559400 |
| H | -6.23139000 | 2.51302100 | 1.50579300  |
| H | -6.50461900 | 4.05136700 | -0.42174600 |
| C | -0.82941600 | 1.68528000 | -0.12612100 |
| P | -0.66273400 | 3.52713500 | -0.10444100 |
| C | 1.70343400  | 1.03149400 | 0.02619800  |
| C | 2.98162600  | 1.48278500 | 0.48224700  |
| C | 3.14739700  | 2.83254900 | 0.85750200  |
| C | 4.07819200  | 0.60901100 | 0.58926900  |
| C | 4.38293900  | 3.27653100 | 1.30890700  |
| H | 2.29577800  | 3.50719400 | 0.81884400  |
| C | 5.30800600  | 1.06355900 | 1.04451300  |

|   |             |             |             |
|---|-------------|-------------|-------------|
| H | 3.94238800  | -0.42903800 | 0.30119500  |
| C | 5.46583600  | 2.40206800  | 1.40099200  |
| H | 4.49943500  | 4.31677000  | 1.59746400  |
| H | 6.14582200  | 0.37604300  | 1.11806200  |
| H | 6.42760300  | 2.76158100  | 1.75353600  |
| C | 0.44135200  | 1.06904700  | -0.12957500 |
| C | 0.12507000  | 3.93461000  | -1.70358400 |
| H | 1.09322600  | 3.42472600  | -1.77146300 |
| H | -0.50174300 | 3.62962300  | -2.54526900 |
| H | 0.29762100  | 5.01053800  | -1.75827300 |
| O | 0.18066900  | 3.98470300  | 1.06865700  |
| C | -3.11608700 | -2.43348900 | 0.29425500  |
| C | -1.80895000 | -2.49395500 | 0.82470900  |
| C | -1.25240100 | -3.67072300 | 1.31017100  |
| C | -2.01813500 | -4.82715000 | 1.19589300  |
| C | -3.30080300 | -4.80133800 | 0.62544100  |
| C | -3.86153300 | -3.61542200 | 0.17723500  |
| C | -3.37000500 | -1.07084200 | -0.02365100 |
| C | -2.25936200 | -0.32170900 | 0.29960400  |
| H | -0.25761400 | -3.69588900 | 1.74593200  |
| H | -1.61343100 | -5.76779600 | 1.55612200  |
| H | -3.86488100 | -5.72520800 | 0.54937600  |
| H | -4.86170000 | -3.59583600 | -0.24460900 |
| H | -4.25465800 | -0.67049500 | -0.49997000 |
| C | -0.31432000 | -0.88741900 | 1.80253000  |
| N | -0.73604800 | -0.37482300 | 2.94061300  |
| C | 0.20010900  | -0.20582000 | 3.88508900  |

|   |             |             |             |
|---|-------------|-------------|-------------|
| C | 1.51942600  | -0.60915300 | 3.70914600  |
| C | 1.86699700  | -1.10363400 | 2.45995800  |
| N | 0.95468100  | -1.21619300 | 1.48264900  |
| H | -0.13208400 | 0.25599600  | 4.81145400  |
| H | 2.25782500  | -0.50437200 | 4.49440200  |
| H | 2.88764600  | -1.37518600 | 2.20607400  |
| N | -1.25385700 | -1.19727100 | 0.78309700  |
| C | 0.35007200  | -1.94251300 | -2.20271300 |
| C | 0.91477200  | -0.69952600 | -2.59265900 |
| C | 2.33755900  | -0.71722000 | -2.25672700 |
| C | 2.61045500  | -1.93221800 | -1.59482300 |
| C | 1.36740100  | -2.67033900 | -1.50815700 |
| C | 1.26238200  | -4.04079600 | -0.93980400 |
| H | 0.22716700  | -4.34985900 | -0.78448000 |
| H | 1.72703400  | -4.76725500 | -1.61714200 |
| H | 1.78652200  | -4.12389000 | 0.01815100  |
| C | -1.05341700 | -2.37305400 | -2.43812500 |
| H | -1.76817200 | -1.56708400 | -2.24260900 |
| H | -1.18873900 | -2.67450000 | -3.48299600 |
| H | -1.33345700 | -3.22481100 | -1.81383700 |
| C | 0.22613000  | 0.39069200  | -3.33303500 |
| H | 0.65624700  | 1.36756600  | -3.09459700 |
| H | 0.31994200  | 0.24930900  | -4.41627100 |
| H | -0.84229500 | 0.42698000  | -3.09755800 |
| C | 3.30100800  | 0.34017000  | -2.65887400 |
| H | 4.25435900  | 0.25696000  | -2.13330900 |
| H | 3.50307400  | 0.27221000  | -3.73416700 |

|                                              |              |             |                             |
|----------------------------------------------|--------------|-------------|-----------------------------|
| H                                            | 2.90876300   | 1.34427900  | -2.46968200                 |
| C                                            | 3.92846900   | -2.46657200 | -1.15146700                 |
| H                                            | 4.21167500   | -3.33608300 | -1.75581700                 |
| H                                            | 4.72822900   | -1.72965500 | -1.25344700                 |
| H                                            | 3.91264300   | -2.80754200 | -0.10976300                 |
| Co                                           | 1.09341000   | -0.83517200 | -0.53417800                 |
| Zero-point correction=                       |              |             | 0.648827 (Hartree/Particle) |
| Thermal correction to Energy=                |              |             | 0.691367                    |
| Thermal correction to Enthalpy=              |              |             | 0.692311                    |
| Thermal correction to Gibbs Free Energy=     |              |             | 0.573410                    |
| Sum of electronic and zero-point Energies=   |              |             | -2233.538749                |
| Sum of electronic and thermal Energies=      |              |             | -2233.496209                |
| Sum of electronic and thermal Enthalpies=    |              |             | -2233.495264                |
| Sum of electronic and thermal Free Energies= |              |             | -2233.614166                |
| E(RM06L) =                                   | -2234.187576 | A.U.        |                             |

**(S)A-9**

1 1

Number of imaginary frequencies: 0

|   |             |             |            |
|---|-------------|-------------|------------|
| C | -1.57619900 | -0.29707500 | 1.04855400 |
| C | -2.95110100 | -0.58513200 | 1.45792900 |
| C | -3.41106900 | -1.89581000 | 1.67445300 |
| C | -3.86069600 | 0.47525400  | 1.62543300 |
| C | -4.72947600 | -2.12761300 | 2.04116500 |
| H | -2.75598000 | -2.74373800 | 1.50049300 |
| C | -5.17897100 | 0.23746400  | 1.99269500 |
| H | -3.52931700 | 1.50023900  | 1.47024400 |
| C | -5.61945100 | -1.06634500 | 2.20356700 |

|   |             |             |             |
|---|-------------|-------------|-------------|
| H | -5.06803900 | -3.14841900 | 2.19132100  |
| H | -5.86070700 | 1.07304700  | 2.11906300  |
| H | -6.64900600 | -1.25554200 | 2.49175700  |
| C | -0.51744100 | -1.15239800 | 0.97173500  |
| P | -0.26255000 | -2.93561000 | 0.66793500  |
| C | 1.07366700  | -2.08411200 | -0.22050700 |
| C | 2.02263100  | -2.52141600 | -1.20791900 |
| C | 2.58148700  | -1.60826300 | -2.11986000 |
| C | 2.40777800  | -3.87253900 | -1.29006200 |
| C | 3.52577300  | -2.02066400 | -3.04967600 |
| H | 2.23720300  | -0.57506000 | -2.09651500 |
| C | 3.35353400  | -4.28212200 | -2.21931300 |
| H | 1.96377500  | -4.59695900 | -0.61089000 |
| C | 3.92015200  | -3.35811800 | -3.09776800 |
| H | 3.94402000  | -1.30477100 | -3.75238500 |
| H | 3.64755000  | -5.32608800 | -2.26585700 |
| H | 4.65077000  | -3.68345700 | -3.83180500 |
| C | 0.74625100  | -0.84663900 | 0.30619500  |
| C | 0.43365300  | -3.68930500 | 2.16842200  |
| H | 0.89647300  | -4.64677400 | 1.91881400  |
| H | 1.17393000  | -3.04599300 | 2.65054000  |
| H | -0.37892100 | -3.88552000 | 2.87221000  |
| O | -1.28949000 | -3.79804300 | 0.00636500  |
| C | -0.41896700 | 2.98955700  | -0.29893400 |
| C | -1.42957600 | 2.59213100  | -1.19478000 |
| C | -1.82262400 | 3.35423600  | -2.28671400 |
| C | -1.18505100 | 4.57906100  | -2.46099500 |

|   |             |             |             |
|---|-------------|-------------|-------------|
| C | -0.20563300 | 5.01991900  | -1.56478300 |
| C | 0.18240900  | 4.23461200  | -0.48428900 |
| C | -0.26338800 | 1.91897000  | 0.69099600  |
| C | -1.28137700 | 0.97261200  | 0.38413700  |
| H | -2.61524300 | 3.02442700  | -2.94761700 |
| H | -1.47062300 | 5.21054800  | -3.29591400 |
| H | 0.25198700  | 5.99336200  | -1.71059900 |
| H | 0.93583900  | 4.59439300  | 0.20894600  |
| H | -0.09434300 | 2.13381700  | 1.74417000  |
| C | -2.83949400 | 0.51522200  | -1.46759400 |
| N | -3.93636100 | 1.11992600  | -1.90417400 |
| C | -4.82203400 | 0.30300300  | -2.48969200 |
| C | -4.61250600 | -1.06624800 | -2.60473200 |
| C | -3.39492500 | -1.55593300 | -2.14113600 |
| N | -2.48064500 | -0.75743100 | -1.58229000 |
| H | -5.72898000 | 0.77213000  | -2.86474600 |
| H | -5.35400100 | -1.71753300 | -3.05203300 |
| H | -3.12595200 | -2.60778500 | -2.21142700 |
| N | -1.91479400 | 1.34274500  | -0.75599400 |
| C | 3.32141300  | 0.03848500  | 1.26332900  |
| C | 3.65854200  | 0.98599700  | 0.26625100  |
| C | 3.17851100  | 2.29612700  | 0.67849800  |
| C | 2.52594900  | 2.15287900  | 1.91079500  |
| C | 2.51320200  | 0.73513500  | 2.24099800  |
| C | 1.91295600  | 0.13936400  | 3.46039200  |
| H | 1.71970700  | -0.92802600 | 3.32920900  |
| H | 2.58534900  | 0.25140400  | 4.31988700  |

|                                              |              |             |                             |
|----------------------------------------------|--------------|-------------|-----------------------------|
| H                                            | 0.96536000   | 0.61659300  | 3.72649700                  |
| C                                            | 3.78644600   | -1.36861200 | 1.35068800                  |
| H                                            | 4.03745500   | -1.78195700 | 0.37168400                  |
| H                                            | 4.68758300   | -1.41367700 | 1.97315500                  |
| H                                            | 3.04038700   | -2.02374600 | 1.80672600                  |
| C                                            | 4.49834600   | 0.77510000  | -0.93970300                 |
| H                                            | 4.05485800   | 1.22363900  | -1.83490000                 |
| H                                            | 5.46926100   | 1.26517900  | -0.79572300                 |
| H                                            | 4.68034800   | -0.28033400 | -1.14290100                 |
| C                                            | 3.44680600   | 3.54355800  | -0.08551800                 |
| H                                            | 3.12607600   | 4.43415600  | 0.45758600                  |
| H                                            | 4.52081300   | 3.64533000  | -0.27579300                 |
| H                                            | 2.95019200   | 3.55039400  | -1.06199300                 |
| C                                            | 1.94937300   | 3.22779400  | 2.75953300                  |
| H                                            | 2.70775400   | 3.58544500  | 3.46518400                  |
| H                                            | 1.61317400   | 4.09062100  | 2.18013900                  |
| H                                            | 1.10782700   | 2.87739800  | 3.36312200                  |
| Co                                           | 1.58247300   | 0.86949200  | 0.50321800                  |
| Zero-point correction=                       |              |             | 0.650474 (Hartree/Particle) |
| Thermal correction to Energy=                |              |             | 0.692356                    |
| Thermal correction to Enthalpy=              |              |             | 0.693300                    |
| Thermal correction to Gibbs Free Energy=     |              |             | 0.576387                    |
| Sum of electronic and zero-point Energies=   |              |             | -2233.546879                |
| Sum of electronic and thermal Energies=      |              |             | -2233.504998                |
| Sum of electronic and thermal Enthalpies=    |              |             | -2233.504053                |
| Sum of electronic and thermal Free Energies= |              |             | -2233.620966                |
| E(RM06L) =                                   | -2234.197353 | A.U.        |                             |

**(T)A-9**

13

Number of imaginary frequencies: 0

|   |             |             |             |
|---|-------------|-------------|-------------|
| C | 1.60423400  | -0.31688000 | -1.05794800 |
| C | 2.98537000  | -0.59256500 | -1.45553300 |
| C | 3.46329600  | -1.90015300 | -1.65207700 |
| C | 3.88188900  | 0.47765300  | -1.63253800 |
| C | 4.78674600  | -2.11959200 | -2.00760300 |
| H | 2.81823600  | -2.75432400 | -1.47159700 |
| C | 5.20506600  | 0.25204900  | -1.98899800 |
| H | 3.53611200  | 1.50033400  | -1.49594800 |
| C | 5.66360800  | -1.04882200 | -2.17890800 |
| H | 5.13944100  | -3.13767400 | -2.14252400 |
| H | 5.87638500  | 1.09456300  | -2.12416700 |
| H | 6.69718800  | -1.22833600 | -2.45874300 |
| C | 0.55388500  | -1.18536700 | -1.00242100 |
| P | 0.31119900  | -2.97346700 | -0.69721200 |
| C | -1.04077700 | -2.13662300 | 0.18896500  |
| C | -1.99826500 | -2.56511900 | 1.17102400  |
| C | -2.56434600 | -1.64017600 | 2.06789700  |
| C | -2.38904600 | -3.91333000 | 1.25941100  |
| C | -3.52125500 | -2.04132000 | 2.98971200  |
| H | -2.21946900 | -0.60655500 | 2.04148200  |
| C | -3.34802700 | -4.31091000 | 2.18037900  |
| H | -1.94097300 | -4.64475300 | 0.59068000  |
| C | -3.92129000 | -3.37696600 | 3.04374100  |
| H | -3.94473200 | -1.31771300 | 3.68107600  |

|   |             |             |             |
|---|-------------|-------------|-------------|
| H | -3.64759300 | -5.35298500 | 2.23186400  |
| H | -4.66263500 | -3.69297000 | 3.77102200  |
| C | -0.70815800 | -0.90578200 | -0.33828300 |
| C | -0.38334000 | -3.73927300 | -2.19054000 |
| H | -0.81614900 | -4.70912100 | -1.93535100 |
| H | -1.14699900 | -3.11261500 | -2.65657700 |
| H | 0.42440800  | -3.91182700 | -2.90577800 |
| O | 1.34510200  | -3.81748700 | -0.02422600 |
| C | 0.46152600  | 3.00746900  | 0.21090700  |
| C | 1.46026500  | 2.61971800  | 1.12710800  |
| C | 1.84507200  | 3.40564500  | 2.20601600  |
| C | 1.21801300  | 4.64036000  | 2.33985100  |
| C | 0.25553800  | 5.07157200  | 1.41922500  |
| C | -0.12818100 | 4.26542100  | 0.35398900  |
| C | 0.30478400  | 1.91598800  | -0.74761700 |
| C | 1.29897000  | 0.96057900  | -0.41006800 |
| H | 2.62549600  | 3.08517600  | 2.88564700  |
| H | 1.50018800  | 5.28989300  | 3.16201300  |
| H | -0.19005600 | 6.05458400  | 1.53434500  |
| H | -0.86626400 | 4.61666100  | -0.36000600 |
| H | 0.07708100  | 2.07803100  | -1.79835800 |
| C | 2.84910300  | 0.53994900  | 1.45847300  |
| N | 3.93526400  | 1.15212300  | 1.91147100  |
| C | 4.81292800  | 0.34374900  | 2.52014100  |
| C | 4.60745100  | -1.02561300 | 2.64152800  |
| C | 3.40135700  | -1.52399800 | 2.15798000  |
| N | 2.49425500  | -0.73393800 | 1.57585800  |

|   |             |             |             |
|---|-------------|-------------|-------------|
| H | 5.71046500  | 0.81983600  | 2.90876600  |
| H | 5.34292700  | -1.67021000 | 3.10796200  |
| H | 3.13605400  | -2.57659000 | 2.23088900  |
| N | 1.93608800  | 1.35798900  | 0.72349500  |
| C | -3.39327400 | 0.06853700  | -1.10192800 |
| C | -3.71023800 | 1.09749000  | -0.14380200 |
| C | -3.21239700 | 2.32070800  | -0.65246800 |
| C | -2.60208900 | 2.07284600  | -1.93620500 |
| C | -2.70489600 | 0.69096700  | -2.21591600 |
| C | -2.22413200 | -0.01624500 | -3.43317100 |
| H | -1.94102800 | -1.04806700 | -3.20633300 |
| H | -2.99783700 | -0.05497900 | -4.20848900 |
| H | -1.34953500 | 0.47252700  | -3.87239700 |
| C | -3.93005100 | -1.31634000 | -1.10994300 |
| H | -4.21236100 | -1.66369500 | -0.11430500 |
| H | -4.82823400 | -1.34637600 | -1.73871400 |
| H | -3.22006800 | -2.03546900 | -1.52771400 |
| C | -4.53957800 | 0.95492400  | 1.08546800  |
| H | -4.10555600 | 1.48056500  | 1.94209000  |
| H | -5.53572400 | 1.38353900  | 0.92332600  |
| H | -4.67520400 | -0.09021500 | 1.36882300  |
| C | -3.40018500 | 3.64486600  | 0.00322100  |
| H | -3.09887300 | 4.46905100  | -0.64674200 |
| H | -4.45583600 | 3.79424700  | 0.25377100  |
| H | -2.83872500 | 3.73885500  | 0.93966500  |
| C | -2.02686900 | 3.10886100  | -2.83607600 |
| H | -2.82086000 | 3.60951400  | -3.40132900 |

|                                              |              |            |                             |
|----------------------------------------------|--------------|------------|-----------------------------|
| H                                            | -1.48707200  | 3.88914500 | -2.29159000                 |
| H                                            | -1.34123900  | 2.67841300 | -3.57104600                 |
| Co                                           | -1.55575000  | 0.84824300 | -0.38768400                 |
| Zero-point correction=                       |              |            | 0.650101 (Hartree/Particle) |
| Thermal correction to Energy=                |              |            | 0.692320                    |
| Thermal correction to Enthalpy=              |              |            | 0.693265                    |
| Thermal correction to Gibbs Free Energy=     |              |            | 0.574787                    |
| Sum of electronic and zero-point Energies=   |              |            | -2233.550378                |
| Sum of electronic and thermal Energies=      |              |            | -2233.508159                |
| Sum of electronic and thermal Enthalpies=    |              |            | -2233.507215                |
| Sum of electronic and thermal Free Energies= |              |            | -2233.625692                |
| E(RM06L) =                                   | -2234.200479 | A.U.       |                             |

### A-13a

1 1

Number of imaginary frequencies: 0

|   |            |             |             |
|---|------------|-------------|-------------|
| C | 3.51120300 | 0.03095300  | 0.85709300  |
| C | 4.74264000 | 0.20918400  | 0.18023100  |
| C | 5.37174400 | -0.88387200 | -0.44442600 |
| C | 5.34477800 | 1.47946600  | 0.12566200  |
| C | 6.57659300 | -0.70406900 | -1.10882200 |
| H | 4.90881200 | -1.86511900 | -0.39053800 |
| C | 6.55011600 | 1.64537600  | -0.54188300 |
| H | 4.86052900 | 2.31869600  | 0.61478400  |
| C | 7.16675500 | 0.55812800  | -1.15918400 |
| H | 7.06092200 | -1.55105800 | -1.58457200 |
| H | 7.01320700 | 2.62635300  | -0.57807700 |
| H | 8.11112300 | 0.69377800  | -1.67723400 |

|   |             |             |             |
|---|-------------|-------------|-------------|
| C | 2.43863700  | -0.12729400 | 1.42181800  |
| P | 0.97304600  | -0.31251800 | 2.34721200  |
| C | -0.78137200 | 1.22140000  | 0.58688300  |
| C | -1.31994200 | 2.45851100  | 0.15047400  |
| C | -1.47484300 | 2.77687300  | -1.21094500 |
| C | -1.71639500 | 3.38325500  | 1.13765900  |
| C | -2.03484400 | 3.99504800  | -1.57035100 |
| H | -1.14948000 | 2.06470900  | -1.96201600 |
| C | -2.26145200 | 4.60212300  | 0.76058300  |
| H | -1.58043900 | 3.13125200  | 2.18582400  |
| C | -2.42991400 | 4.90606800  | -0.59008400 |
| H | -2.15614700 | 4.24161700  | -2.62065400 |
| H | -2.55926700 | 5.31567000  | 1.52207700  |
| H | -2.86416700 | 5.85791100  | -0.87983400 |
| C | -0.28131800 | 0.23644400  | 1.17334500  |
| O | 0.84978600  | 0.49067100  | 3.59604800  |
| C | -2.53283900 | -2.06381400 | -1.27359300 |
| C | -2.37001500 | -2.50443400 | 0.09044500  |
| C | -2.81776400 | -1.46095400 | 0.94952600  |
| C | -3.32384600 | -0.38711000 | 0.11906100  |
| C | -3.16191700 | -0.76772600 | -1.24422300 |
| O | 0.39999500  | -1.70781900 | -0.62912100 |
| C | 0.63615300  | -0.91360500 | -1.60389500 |
| O | -0.29727800 | -0.08681600 | -1.87972400 |
| C | 1.92635000  | -0.92511700 | -2.33154900 |
| C | -3.48739100 | 0.05109700  | -2.43700200 |
| H | -2.68141000 | 0.01390100  | -3.17520100 |

|                        |             |             |                             |
|------------------------|-------------|-------------|-----------------------------|
| H                      | -4.39157200 | -0.33299600 | -2.92224900                 |
| H                      | -3.66479700 | 1.09714800  | -2.17846300                 |
| C                      | -2.16311700 | -2.83302400 | -2.48888100                 |
| H                      | -1.31094200 | -3.49128100 | -2.30310300                 |
| H                      | -2.99721500 | -3.46376300 | -2.81618700                 |
| H                      | -1.90917400 | -2.17186900 | -3.32089900                 |
| C                      | -1.73508900 | -3.78377800 | 0.48703100                  |
| H                      | -1.55501900 | -3.84255600 | 1.56145800                  |
| H                      | -2.38084100 | -4.62330900 | 0.20770200                  |
| H                      | -0.78026100 | -3.92615300 | -0.02845900                 |
| C                      | -2.85356300 | -1.45435900 | 2.43484300                  |
| H                      | -2.35802500 | -0.57159000 | 2.85285700                  |
| H                      | -3.89161000 | -1.43445500 | 2.78409300                  |
| H                      | -2.38476800 | -2.34205900 | 2.86207400                  |
| C                      | -3.99206400 | 0.83038000  | 0.63929300                  |
| H                      | -5.03908200 | 0.59716000  | 0.86611800                  |
| H                      | -3.53218000 | 1.18159600  | 1.56677000                  |
| H                      | -3.98454000 | 1.65467000  | -0.07709300                 |
| H                      | 1.79179400  | -0.61081500 | -3.36670500                 |
| H                      | 2.60540100  | -0.21495400 | -1.84792400                 |
| H                      | 2.38788600  | -1.91182700 | -2.28497300                 |
| Co                     | -1.32673100 | -0.77273100 | -0.31600800                 |
| C                      | 0.77441200  | -2.09207900 | 2.53204400                  |
| H                      | 1.59194500  | -2.46049900 | 3.15496200                  |
| H                      | -0.16478600 | -2.29809900 | 3.04987000                  |
| H                      | 0.79995100  | -2.59725800 | 1.56508400                  |
| Zero-point correction= |             |             | 0.522696 (Hartree/Particle) |

|                                              |              |
|----------------------------------------------|--------------|
| Thermal correction to Energy=                | 0.559918     |
| Thermal correction to Enthalpy=              | 0.560862     |
| Thermal correction to Gibbs Free Energy=     | 0.451033     |
| Sum of electronic and zero-point Energies=   | -1835.840848 |
| Sum of electronic and thermal Energies=      | -1835.803626 |
| Sum of electronic and thermal Enthalpies=    | -1835.802682 |
| Sum of electronic and thermal Free Energies= | -1835.912511 |

E(RM06L) = -1836.363544 A.U.

### A-13b

1 1

Number of imaginary frequencies: 0

|   |            |             |             |
|---|------------|-------------|-------------|
| C | 3.68526900 | -0.90915200 | -0.22403700 |
| C | 5.02899000 | -1.25183000 | 0.05178000  |
| C | 5.75734900 | -2.04952600 | -0.84974400 |
| C | 5.64464900 | -0.79313700 | 1.23102100  |
| C | 7.07593200 | -2.37816500 | -0.57130000 |
| H | 5.27894100 | -2.40021300 | -1.75884900 |
| C | 6.96373800 | -1.13024700 | 1.49681900  |
| H | 5.07857200 | -0.17695900 | 1.92233600  |
| C | 7.68000400 | -1.92079300 | 0.59913600  |
| H | 7.63582200 | -2.99279700 | -1.26892600 |
| H | 7.43642400 | -0.77483600 | 2.40685800  |
| H | 8.71231600 | -2.18092600 | 0.81192800  |
| C | 2.52334100 | -0.61109800 | -0.45945500 |
| P | 0.88733800 | -0.18259600 | -0.80506600 |
| C | 0.68860300 | 2.72690300  | -0.36744500 |
| C | 0.54726100 | 4.09822900  | -0.05043700 |

|   |             |             |             |
|---|-------------|-------------|-------------|
| C | 1.01008000  | 5.09370000  | -0.92871700 |
| C | -0.07507300 | 4.46610400  | 1.15758600  |
| C | 0.85170000  | 6.43232500  | -0.59786200 |
| H | 1.49118200  | 4.80488900  | -1.85785900 |
| C | -0.22747300 | 5.80829900  | 1.47433100  |
| H | -0.42973200 | 3.68856500  | 1.82888400  |
| C | 0.23481700  | 6.79123700  | 0.59965000  |
| H | 1.21162000  | 7.19948700  | -1.27598600 |
| H | -0.70568000 | 6.09029800  | 2.40703000  |
| H | 0.11488500  | 7.84007700  | 0.85285700  |
| C | 0.77598200  | 1.53688600  | -0.63272100 |
| C | 0.60675600  | -0.58044300 | -2.53623300 |
| H | -0.42020800 | -0.31601400 | -2.79649500 |
| H | 1.30144200  | -0.03060700 | -3.17424600 |
| H | 0.76320300  | -1.65180500 | -2.68275800 |
| O | -0.05525400 | -0.92664100 | 0.14869600  |
| C | -3.89459700 | -1.72375100 | 0.22802700  |
| C | -3.15243300 | -2.49419300 | -0.74212500 |
| C | -2.01730600 | -3.04906600 | -0.08983500 |
| C | -2.06822900 | -2.66379100 | 1.30935000  |
| C | -3.24115100 | -1.88272000 | 1.50486700  |
| O | -2.20029000 | 0.30682800  | -1.36734700 |
| C | -2.35427300 | 1.22523100  | -0.48529200 |
| O | -2.29149800 | 0.85572800  | 0.73065600  |
| C | -2.63666000 | 2.62969000  | -0.87766700 |
| C | -3.66005200 | -1.19980500 | 2.75269100  |
| H | -3.88760300 | -0.14660700 | 2.56723400  |

|                                            |             |             |                             |
|--------------------------------------------|-------------|-------------|-----------------------------|
| H                                          | -4.56702400 | -1.66725900 | 3.15115500                  |
| H                                          | -2.89127400 | -1.24662200 | 3.52508500                  |
| C                                          | -5.13111700 | -0.94116500 | -0.03048700                 |
| H                                          | -5.15936800 | -0.56454900 | -1.05633500                 |
| H                                          | -6.02550600 | -1.55707300 | 0.11592100                  |
| H                                          | -5.21017900 | -0.08639900 | 0.64641300                  |
| C                                          | -3.46120900 | -2.55043200 | -2.19206500                 |
| H                                          | -2.61121800 | -2.90337900 | -2.77952300                 |
| H                                          | -4.29768500 | -3.23345500 | -2.37588500                 |
| H                                          | -3.75093400 | -1.56785900 | -2.57364400                 |
| C                                          | -0.92598900 | -3.85247800 | -0.69478100                 |
| H                                          | 0.05044600  | -3.50876100 | -0.34066500                 |
| H                                          | -1.02414800 | -4.90654800 | -0.41258500                 |
| H                                          | -0.93468900 | -3.80349500 | -1.78571700                 |
| C                                          | -1.02668300 | -3.00855600 | 2.30826400                  |
| H                                          | -1.05546600 | -4.07859400 | 2.54140200                  |
| H                                          | -0.03006000 | -2.77996600 | 1.91993500                  |
| H                                          | -1.15619700 | -2.46020600 | 3.24256900                  |
| H                                          | -2.43281900 | 3.31526000  | -0.05507600                 |
| H                                          | -2.04683500 | 2.90529600  | -1.75356100                 |
| H                                          | -3.69266900 | 2.71821000  | -1.15095600                 |
| Co                                         | -2.03306200 | -1.02167000 | 0.10516700                  |
| Zero-point correction=                     |             |             | 0.522824 (Hartree/Particle) |
| Thermal correction to Energy=              |             |             | 0.560442                    |
| Thermal correction to Enthalpy=            |             |             | 0.561386                    |
| Thermal correction to Gibbs Free Energy=   |             |             | 0.447366                    |
| Sum of electronic and zero-point Energies= |             |             | -1835.852098                |

Sum of electronic and thermal Energies= -1835.814480  
 Sum of electronic and thermal Enthalpies= -1835.813536  
 Sum of electronic and thermal Free Energies= -1835.927557  
 E(RM06L) = -1836.374922 A.U.

**A-14a**

1 1

Number of imaginary frequencies: 0

|   |             |             |             |
|---|-------------|-------------|-------------|
| C | 3.19394900  | -0.57030900 | 0.69913400  |
| C | 4.40520300  | -0.72744300 | -0.01788900 |
| C | 4.72179800  | 0.13733400  | -1.08157400 |
| C | 5.30200000  | -1.75353700 | 0.33093400  |
| C | 5.90954900  | -0.02458400 | -1.77978400 |
| H | 4.03157600  | 0.93440800  | -1.34766600 |
| C | 6.48708400  | -1.90487600 | -0.37511500 |
| H | 5.05739200  | -2.41580300 | 1.15509600  |
| C | 6.79270200  | -1.04459500 | -1.42856300 |
| H | 6.15066600  | 0.64670400  | -2.59796200 |
| H | 7.17705500  | -2.69644200 | -0.10103000 |
| H | 7.72219200  | -1.16741900 | -1.97568800 |
| C | 2.13529900  | -0.44198000 | 1.29937000  |
| P | 0.75146800  | -0.30329700 | 2.35602800  |
| C | -1.68823200 | -1.02315900 | 0.71134600  |
| C | -2.82290100 | -1.73855600 | 0.22012400  |
| C | -4.11772000 | -1.21109000 | 0.36586500  |
| C | -2.64141500 | -2.97628600 | -0.42294200 |
| C | -5.21132400 | -1.91315700 | -0.12031600 |
| H | -4.25109900 | -0.26664500 | 0.88658300  |

|   |             |             |             |
|---|-------------|-------------|-------------|
| C | -3.74124200 | -3.66041400 | -0.92226200 |
| H | -1.63943400 | -3.38377000 | -0.52237600 |
| C | -5.02339200 | -3.13180800 | -0.77371400 |
| H | -6.21224200 | -1.51497600 | 0.01246700  |
| H | -3.60010600 | -4.61420300 | -1.42027500 |
| H | -5.87998500 | -3.67600100 | -1.15876000 |
| C | -0.56388200 | -0.88794800 | 1.29106500  |
| O | 0.89778300  | -0.89519500 | 3.70716100  |
| C | -1.17971000 | 2.74585300  | -0.23084000 |
| C | 0.04828300  | 2.19575400  | -0.70654100 |
| C | -0.27734300 | 1.02265800  | -1.48334700 |
| C | -1.71202200 | 0.92464000  | -1.58923600 |
| C | -2.26097700 | 1.96213100  | -0.79012300 |
| C | -3.69951800 | 2.23055000  | -0.54568600 |
| H | -3.90397500 | 2.42336000  | 0.51206700  |
| H | -4.00974800 | 3.13028800  | -1.08986300 |
| H | -4.33495900 | 1.40727800  | -0.87670000 |
| C | -1.34933000 | 3.94617100  | 0.62619300  |
| H | -0.45471900 | 4.15759300  | 1.21544500  |
| H | -1.55386400 | 4.83030200  | 0.01180400  |
| H | -2.18791900 | 3.83622500  | 1.31880800  |
| C | 1.42539000  | 2.69823900  | -0.47727300 |
| H | 2.09152900  | 1.90040500  | -0.13023000 |
| H | 1.83896400  | 3.08798300  | -1.41442200 |
| H | 1.45338400  | 3.50839600  | 0.25369300  |
| C | 0.71749300  | 0.10459800  | -2.08545200 |
| H | 0.28310500  | -0.86685400 | -2.33083500 |

|                                              |              |             |                             |
|----------------------------------------------|--------------|-------------|-----------------------------|
| H                                            | 1.11859400   | 0.53464400  | -3.01172900                 |
| H                                            | 1.56243600   | -0.05972800 | -1.40883900                 |
| C                                            | -2.44745900  | -0.04916000 | -2.43393400                 |
| H                                            | -2.48448100  | 0.31627600  | -3.46617300                 |
| H                                            | -1.96037700  | -1.02731600 | -2.45534700                 |
| H                                            | -3.47626500  | -0.20022200 | -2.10007400                 |
| Co                                           | -0.95961100  | 0.80918700  | 0.38798500                  |
| C                                            | 0.07637500   | 1.31607700  | 2.03429500                  |
| H                                            | 0.77673200   | 2.14654100  | 1.94467500                  |
| H                                            | -0.73117900  | 1.54134400  | 2.74161300                  |
| Zero-point correction=                       |              |             | 0.458995 (Hartree/Particle) |
| Thermal correction to Energy=                |              |             | 0.489906                    |
| Thermal correction to Enthalpy=              |              |             | 0.490850                    |
| Thermal correction to Gibbs Free Energy=     |              |             | 0.396411                    |
| Sum of electronic and zero-point Energies=   |              |             | -1606.756920                |
| Sum of electronic and thermal Energies=      |              |             | -1606.726009                |
| Sum of electronic and thermal Enthalpies=    |              |             | -1606.725065                |
| Sum of electronic and thermal Free Energies= |              |             | -1606.819504                |
| E(RM06L) =                                   | -1607.215915 | A.U.        |                             |

### A-14b

1 1

Number of imaginary frequencies: 0

|   |             |            |             |
|---|-------------|------------|-------------|
| C | -0.16954900 | 2.57245700 | -0.06826900 |
| C | 0.06740400  | 3.96626500 | -0.03811300 |
| C | 0.89612500  | 4.56436200 | -1.00556600 |
| C | -0.52153000 | 4.76215500 | 0.96175900  |
| C | 1.12664900  | 5.93177700 | -0.96901500 |

|   |             |             |             |
|---|-------------|-------------|-------------|
| H | 1.34195000  | 3.94827900  | -1.78091400 |
| C | -0.28121200 | 6.12832100  | 0.98698000  |
| H | -1.16078900 | 4.29692100  | 1.70532300  |
| C | 0.54059000  | 6.71428200  | 0.02515000  |
| H | 1.76272200  | 6.39080400  | -1.71912800 |
| H | -0.73755000 | 6.73972100  | 1.75883700  |
| H | 0.72336500  | 7.78410400  | 0.04898100  |
| C | -0.36850900 | 1.36617000  | -0.09436800 |
| P | -0.59222300 | -0.34523000 | -0.10759600 |
| C | -3.48849700 | -0.85119800 | -0.02991800 |
| C | -4.87870800 | -1.09727300 | -0.03384300 |
| C | -5.36775700 | -2.41395600 | -0.12517600 |
| C | -5.78232900 | -0.02116900 | 0.05221100  |
| C | -6.73569000 | -2.64241300 | -0.12958100 |
| H | -4.66688500 | -3.24019000 | -0.18945400 |
| C | -7.14742700 | -0.26512200 | 0.04577000  |
| H | -5.39902500 | 0.99174800  | 0.12253300  |
| C | -7.62529500 | -1.57196800 | -0.04488400 |
| H | -7.11109400 | -3.65829600 | -0.19893200 |
| H | -7.84251100 | 0.56568000  | 0.11200600  |
| H | -8.69504400 | -1.75705900 | -0.04909800 |
| C | -2.28600300 | -0.62057100 | -0.01470200 |
| C | 0.34243300  | -1.05711800 | -1.41976200 |
| H | -0.08367700 | -2.00257100 | -1.77038600 |
| H | 0.61205300  | -0.40230300 | -2.24793100 |
| O | 0.17973300  | -1.03989000 | 1.08055600  |
| C | 3.36291100  | -1.47554300 | -1.11027300 |

|                               |            |             |                             |
|-------------------------------|------------|-------------|-----------------------------|
| C                             | 3.32870000 | -0.40950200 | -0.14181500                 |
| C                             | 3.28162100 | -0.99739800 | 1.19085600                  |
| C                             | 3.19754400 | -2.39488900 | 1.03987800                  |
| C                             | 3.21966200 | -2.69280400 | -0.38855500                 |
| C                             | 3.09745200 | -4.05219400 | -0.97075600                 |
| H                             | 2.78556000 | -4.02351200 | -2.01678400                 |
| H                             | 4.06338300 | -4.56975400 | -0.93066700                 |
| H                             | 2.38614500 | -4.67155100 | -0.41751600                 |
| C                             | 3.46855300 | -1.32467400 | -2.58431900                 |
| H                             | 3.09422700 | -0.35562800 | -2.92187700                 |
| H                             | 4.51433600 | -1.39716100 | -2.90195700                 |
| H                             | 2.91160100 | -2.10070000 | -3.11487300                 |
| C                             | 3.37456100 | 1.04362900  | -0.43588000                 |
| H                             | 2.82224600 | 1.62707400  | 0.30540700                  |
| H                             | 4.41197600 | 1.40002100  | -0.42430100                 |
| H                             | 2.96191000 | 1.27110500  | -1.42212600                 |
| C                             | 3.17962000 | -0.21578900 | 2.44833000                  |
| H                             | 2.82665600 | -0.82673100 | 3.28044500                  |
| H                             | 4.15495600 | 0.19912400  | 2.72523300                  |
| H                             | 2.48700100 | 0.62393500  | 2.33917900                  |
| C                             | 3.02183100 | -3.40807800 | 2.11110600                  |
| H                             | 3.96839700 | -3.91950100 | 2.31938600                  |
| H                             | 2.67504800 | -2.95959800 | 3.04357700                  |
| H                             | 2.30127900 | -4.17938800 | 1.82508900                  |
| Co                            | 1.67475400 | -1.46309500 | -0.00200100                 |
| Zero-point correction=        |            |             | 0.458245 (Hartree/Particle) |
| Thermal correction to Energy= |            |             | 0.490238                    |

|                                              |              |
|----------------------------------------------|--------------|
| Thermal correction to Enthalpy=              | 0.491182     |
| Thermal correction to Gibbs Free Energy=     | 0.389599     |
| Sum of electronic and zero-point Energies=   | -1606.770690 |
| Sum of electronic and thermal Energies=      | -1606.738698 |
| Sum of electronic and thermal Enthalpies=    | -1606.737753 |
| Sum of electronic and thermal Free Energies= | -1606.839336 |

E(RM06L) = -1607.228936 A.U.

### A-TSa1

1 1

Number of imaginary frequencies: 1

|   |             |             |             |
|---|-------------|-------------|-------------|
| C | -0.62007300 | -1.16478400 | -1.81770800 |
| C | -1.23377300 | -2.11782800 | -0.91625100 |
| C | -2.51358800 | -1.61765000 | -0.55882200 |
| C | -2.72186800 | -0.36102600 | -1.24168300 |
| C | -1.57400900 | -0.12302000 | -2.05813100 |
| O | -0.36411900 | 0.15495800  | 2.94786500  |
| O | -2.12080600 | 0.18553000  | 1.55350900  |
| C | -1.59378300 | 0.31642700  | 2.70927800  |
| C | -3.47843800 | -2.24132500 | 0.37907500  |
| H | -4.28840000 | -2.72320600 | -0.18011200 |
| H | -3.00858100 | -3.00513900 | 1.00188500  |
| H | -3.93015500 | -1.49317100 | 1.03513300  |
| C | -0.66983900 | -3.42920300 | -0.50221200 |
| H | -0.83042400 | -3.63154400 | 0.56023500  |
| H | -1.16123100 | -4.23497700 | -1.05901600 |
| H | 0.40044900  | -3.49398200 | -0.70417200 |
| C | 0.70703600  | -1.30408400 | -2.47358700 |

|   |             |             |             |
|---|-------------|-------------|-------------|
| H | 1.41855600  | -1.83491300 | -1.83553600 |
| H | 0.62216700  | -1.86400500 | -3.41159800 |
| H | 1.14459100  | -0.33180800 | -2.71755800 |
| C | -1.35878000 | 1.04093000  | -2.95495400 |
| H | -0.31470400 | 1.36703800  | -2.96606600 |
| H | -1.61915500 | 0.76759900  | -3.98333000 |
| H | -1.98134600 | 1.89690200  | -2.68331000 |
| C | -3.94218500 | 0.47776600  | -1.11447000 |
| H | -3.81946300 | 1.45772000  | -1.58236100 |
| H | -4.80118200 | -0.00262300 | -1.59547200 |
| H | -4.20213300 | 0.62953900  | -0.06212400 |
| C | 4.10549800  | 0.75070300  | -0.20653700 |
| C | 2.96027300  | 0.06119000  | 0.18602700  |
| C | 2.99700000  | -1.29595000 | 0.60466700  |
| C | 4.22555500  | -1.97555700 | 0.63744100  |
| C | 5.36508600  | -1.29726000 | 0.24364400  |
| C | 5.30169800  | 0.04471800  | -0.17243400 |
| H | 4.06241400  | 1.78902100  | -0.50957400 |
| H | 4.27401800  | -3.00987600 | 0.96383200  |
| H | 6.32535800  | -1.80227700 | 0.25865000  |
| H | 6.21595400  | 0.54878300  | -0.46983700 |
| C | 0.80216800  | -0.61078100 | 0.73890400  |
| H | 0.19102200  | -0.27751500 | 1.81640800  |
| C | 1.66669500  | -1.68076800 | 0.92857700  |
| H | 1.37470800  | -2.63595500 | 1.34659000  |
| N | 1.63187400  | 0.45998200  | 0.26157400  |
| C | 1.03982600  | 1.65264300  | -0.03605300 |

|                                              |              |             |                             |
|----------------------------------------------|--------------|-------------|-----------------------------|
| N                                            | -0.31764400  | 1.57820000  | -0.05764600                 |
| C                                            | -0.99287800  | 2.72671600  | -0.19072700                 |
| C                                            | -0.33220600  | 3.92954300  | -0.38084500                 |
| C                                            | 1.05958700   | 3.87185800  | -0.45349000                 |
| N                                            | 1.75513000   | 2.74894200  | -0.27063100                 |
| H                                            | -2.07718800  | 2.64622300  | -0.15732500                 |
| H                                            | -0.87493300  | 4.85929400  | -0.49249000                 |
| H                                            | 1.64605600   | 4.76445300  | -0.65972700                 |
| Co                                           | -1.05337900  | -0.25122600 | -0.04085900                 |
| C                                            | -2.49879700  | 0.66818700  | 3.84915500                  |
| H                                            | -2.56106300  | -0.18365900 | 4.53092000                  |
| H                                            | -2.07259200  | 1.49501400  | 4.41969000                  |
| H                                            | -3.49886400  | 0.92374800  | 3.50219500                  |
| Zero-point correction=                       |              |             | 0.459749 (Hartree/Particle) |
| Thermal correction to Energy=                |              |             | 0.489245                    |
| Thermal correction to Enthalpy=              |              |             | 0.490189                    |
| Thermal correction to Gibbs Free Energy=     |              |             | 0.400155                    |
| Sum of electronic and zero-point Energies=   |              |             | -1390.738562                |
| Sum of electronic and thermal Energies=      |              |             | -1390.709065                |
| Sum of electronic and thermal Enthalpies=    |              |             | -1390.708121                |
| Sum of electronic and thermal Free Energies= |              |             | -1390.798155                |
| E(RM06L) =                                   | -1391.198310 | A.U.        |                             |

### A-TSb1

1 1

Number of imaginary frequencies: 1

|   |             |             |             |
|---|-------------|-------------|-------------|
| C | -1.07755800 | -2.12163900 | -1.05334300 |
| C | -2.27678500 | -1.34404300 | -1.06256600 |

|   |             |             |             |
|---|-------------|-------------|-------------|
| C | -2.00284000 | -0.09153200 | -1.69255000 |
| C | -0.63368400 | -0.12937800 | -2.15054400 |
| C | -0.06459300 | -1.37498000 | -1.76515600 |
| O | -1.99285300 | -0.16486800 | 1.41083400  |
| O | -0.36751500 | 0.15601800  | 2.91483400  |
| C | -1.58877500 | 0.08782000  | 2.59586100  |
| C | -2.98530000 | 0.99976800  | -1.92861900 |
| H | -3.56999100 | 0.80772700  | -2.83549800 |
| H | -3.69839500 | 1.08814300  | -1.10354400 |
| H | -2.49940700 | 1.96999200  | -2.06412200 |
| C | -3.56598300 | -1.74074800 | -0.44899600 |
| H | -3.42647700 | -2.46238700 | 0.35796700  |
| H | -4.10584000 | -0.88277600 | -0.04446400 |
| H | -4.20441000 | -2.21023800 | -1.20633300 |
| C | -0.95740000 | -3.51798600 | -0.55610700 |
| H | -1.45053800 | -3.65264900 | 0.41086900  |
| H | -1.43380800 | -4.21208300 | -1.25805500 |
| H | 0.08542300  | -3.82169000 | -0.44710800 |
| C | 1.29643200  | -1.86225100 | -2.10365400 |
| H | 1.72686400  | -2.46923200 | -1.30246600 |
| H | 1.24985200  | -2.48939800 | -3.00127200 |
| H | 1.98770700  | -1.04263500 | -2.31482000 |
| C | 0.05480800  | 0.95462200  | -2.89891300 |
| H | 1.13561500  | 0.94903400  | -2.73321300 |
| H | -0.10669400 | 0.82956400  | -3.97538300 |
| H | -0.32795000 | 1.94483500  | -2.63425700 |
| C | 0.97787600  | -0.88713100 | 0.94652000  |

|    |             |             |             |
|----|-------------|-------------|-------------|
| C  | 2.08344700  | -0.17306600 | 0.45797400  |
| C  | 3.39704200  | -0.68231900 | 0.37612900  |
| C  | 3.62945300  | -1.99246800 | 0.80736000  |
| C  | 2.56545400  | -2.73622200 | 1.31591000  |
| C  | 1.27846700  | -2.19627300 | 1.37884800  |
| H  | 0.27271000  | -0.29947700 | 1.87830000  |
| H  | 4.62705200  | -2.41920700 | 0.75929200  |
| H  | 2.74239700  | -3.74443400 | 1.67807300  |
| H  | 0.47854600  | -2.79247500 | 1.81374900  |
| C  | 3.44553600  | 1.44003100  | -0.39142400 |
| H  | 3.67056500  | 2.42681200  | -0.76339100 |
| C  | 4.22886000  | 0.35367600  | -0.17157600 |
| H  | 5.28918300  | 0.29624300  | -0.37090800 |
| N  | 2.12394300  | 1.13578300  | -0.02734900 |
| C  | 1.09224200  | 2.04804800  | -0.00585600 |
| N  | 1.41908900  | 3.32906400  | -0.17569200 |
| C  | 0.43827500  | 4.22063800  | -0.07944400 |
| C  | -0.87449700 | 3.86259700  | 0.22568500  |
| C  | -1.13048400 | 2.50816100  | 0.32873800  |
| N  | -0.16676900 | 1.58144400  | 0.17235600  |
| H  | 0.71883900  | 5.25880700  | -0.24364900 |
| H  | -1.66091400 | 4.59613500  | 0.34945400  |
| H  | -2.12425900 | 2.11334400  | 0.52344700  |
| Co | -0.73309200 | -0.33600300 | -0.08455800 |
| C  | -2.62023000 | 0.33902500  | 3.64934200  |
| H  | -2.58344000 | 1.39177800  | 3.94249600  |
| H  | -3.62115100 | 0.10095200  | 3.29264400  |

|                                              |              |             |                             |
|----------------------------------------------|--------------|-------------|-----------------------------|
| H                                            | -2.38745700  | -0.24196400 | 4.54299500                  |
| Zero-point correction=                       |              |             | 0.460441 (Hartree/Particle) |
| Thermal correction to Energy=                |              |             | 0.489427                    |
| Thermal correction to Enthalpy=              |              |             | 0.490371                    |
| Thermal correction to Gibbs Free Energy=     |              |             | 0.403224                    |
| Sum of electronic and zero-point Energies=   |              |             | -1390.732797                |
| Sum of electronic and thermal Energies=      |              |             | -1390.703811                |
| Sum of electronic and thermal Enthalpies=    |              |             | -1390.702867                |
| Sum of electronic and thermal Free Energies= |              |             | -1390.790014                |
| E(RM06L) =                                   | -1391.193238 | A.U.        |                             |

### A-TSc1

1 1

Number of imaginary frequencies: 1

|   |            |             |             |
|---|------------|-------------|-------------|
| C | 2.04282400 | 1.17575600  | -1.40256100 |
| C | 2.98506600 | 0.10787200  | -1.14660900 |
| C | 2.39352700 | -1.12372200 | -1.57396700 |
| C | 1.06176300 | -0.83728500 | -2.00405400 |
| C | 0.84894700 | 0.59563100  | -1.92471100 |
| O | 2.00711100 | 0.22228500  | 2.83740700  |
| O | 1.99689600 | -1.38468500 | 1.26513400  |
| C | 2.35769700 | -0.92053700 | 2.39642500  |
| C | 3.01192600 | -2.46558600 | -1.43896300 |
| H | 3.80155400 | -2.59777700 | -2.18613500 |
| H | 3.46378300 | -2.59577900 | -0.45182100 |
| H | 2.28431400 | -3.26629600 | -1.58106500 |
| C | 4.32677400 | 0.26409400  | -0.53009800 |
| H | 4.66462600 | -0.66676600 | -0.06830400 |

|   |             |             |             |
|---|-------------|-------------|-------------|
| H | 5.07142500  | 0.54432600  | -1.28398000 |
| H | 4.33404200  | 1.04694400  | 0.23402200  |
| C | 2.28862700  | 2.61201300  | -1.12815200 |
| H | 2.82404700  | 2.75980600  | -0.18574900 |
| H | 2.91261200  | 3.04099100  | -1.92084100 |
| H | 1.36003000  | 3.18432000  | -1.08748100 |
| C | -0.38000900 | 1.31038000  | -2.35195200 |
| H | -0.46664800 | 2.29605000  | -1.88861400 |
| H | -0.37325300 | 1.45235200  | -3.43859400 |
| H | -1.28612900 | 0.74808200  | -2.10797100 |
| C | 0.04265100  | -1.82980400 | -2.42628900 |
| H | -0.97177500 | -1.47015200 | -2.23802300 |
| H | 0.12554300  | -2.02623900 | -3.50190800 |
| H | 0.16155700  | -2.78424200 | -1.90811000 |
| C | -3.07768100 | 2.24009600  | 0.19862200  |
| C | -2.02914600 | 1.38281000  | 0.53620500  |
| C | -0.74089800 | 1.87737100  | 0.87407700  |
| C | -0.51034800 | 3.25869100  | 0.88935200  |
| C | -1.55035200 | 4.11389400  | 0.56225500  |
| C | -2.81264600 | 3.60390600  | 0.21846400  |
| H | -4.05586300 | 1.85587500  | -0.05346000 |
| H | 0.46352700  | 3.64530900  | 1.17657000  |
| H | -1.39562500 | 5.18797300  | 0.58116000  |
| H | -3.61285800 | 4.29409300  | -0.03016000 |
| H | 1.20103000  | 0.62494800  | 2.03181300  |
| C | 0.12273900  | 0.75629000  | 1.13223100  |
| N | -1.95612500 | -0.01916400 | 0.57126900  |

|                                              |              |             |                             |
|----------------------------------------------|--------------|-------------|-----------------------------|
| C                                            | -2.97157200  | -0.96173100 | 0.32697800                  |
| N                                            | -2.58430700  | -2.23938300 | 0.39474000                  |
| C                                            | -3.54698100  | -3.13742600 | 0.17902200                  |
| C                                            | -4.85945100  | -2.77694300 | -0.10854000                 |
| C                                            | -5.12198000  | -1.41437800 | -0.16976800                 |
| N                                            | -4.18361700  | -0.48745000 | 0.04739000                  |
| H                                            | -3.24750100  | -4.18198300 | 0.23829700                  |
| H                                            | -5.63139200  | -3.51704800 | -0.27944700                 |
| H                                            | -6.11712600  | -1.03895700 | -0.39919700                 |
| Co                                           | 1.28241400   | -0.18526600 | -0.11117000                 |
| C                                            | -0.67513400  | -0.38334200 | 0.96278200                  |
| H                                            | -0.49450400  | -1.42269100 | 1.20364900                  |
| C                                            | 3.26891800   | -1.74572400 | 3.24168800                  |
| H                                            | 3.27167500   | -2.78385500 | 2.91277800                  |
| H                                            | 4.28454200   | -1.34804800 | 3.15309000                  |
| H                                            | 2.98789600   | -1.67183100 | 4.29233000                  |
| Zero-point correction=                       |              |             | 0.459502 (Hartree/Particle) |
| Thermal correction to Energy=                |              |             | 0.489243                    |
| Thermal correction to Enthalpy=              |              |             | 0.490188                    |
| Thermal correction to Gibbs Free Energy=     |              |             | 0.399140                    |
| Sum of electronic and zero-point Energies=   |              |             | -1390.699147                |
| Sum of electronic and thermal Energies=      |              |             | -1390.669406                |
| Sum of electronic and thermal Enthalpies=    |              |             | -1390.668462                |
| Sum of electronic and thermal Free Energies= |              |             | -1390.759509                |
| E(RM06L) =                                   | -1391.158649 | A.U.        |                             |

### A-TSd1

1 1

Number of imaginary frequencies: 1

|   |             |             |             |
|---|-------------|-------------|-------------|
| C | -0.94935800 | -0.13509500 | -2.10769800 |
| C | -1.63430000 | -1.27484400 | -1.54117800 |
| C | -2.76643300 | -0.78103100 | -0.82605300 |
| C | -2.79054100 | 0.65242800  | -0.91481600 |
| C | -1.69284500 | 1.04100900  | -1.75093900 |
| O | -1.39321800 | -2.73223100 | 1.54103200  |
| O | -1.14543600 | -0.51858400 | 1.91439500  |
| C | -1.63424900 | -1.75143300 | 2.21567800  |
| C | -3.77370800 | -1.60029300 | -0.10866000 |
| H | -4.64614200 | -1.73791500 | -0.75888200 |
| H | -3.39600200 | -2.58792700 | 0.15776000  |
| H | -4.13570400 | -1.10524900 | 0.79716500  |
| C | -1.27998000 | -2.70584000 | -1.72025100 |
| H | -1.35236000 | -3.25208600 | -0.77621600 |
| H | -1.96372700 | -3.17726200 | -2.43502500 |
| H | -0.26651500 | -2.82222000 | -2.10914700 |
| C | 0.26484200  | -0.17080700 | -2.96390200 |
| H | 0.89811500  | -1.02886200 | -2.72742100 |
| H | -0.01221200 | -0.24022100 | -4.02182700 |
| H | 0.87217900  | 0.73101800  | -2.84766000 |
| C | -1.34403700 | 2.42396400  | -2.16379000 |
| H | -0.26289300 | 2.58290100  | -2.20528600 |
| H | -1.73437100 | 2.61475200  | -3.16957200 |
| H | -1.77528400 | 3.17954800  | -1.50301800 |
| C | -3.82772700 | 1.53128600  | -0.30822100 |
| H | -3.56505200 | 2.58941600  | -0.38287000 |

|    |             |             |             |
|----|-------------|-------------|-------------|
| H  | -4.79326400 | 1.40793700  | -0.81102300 |
| H  | -3.98791800 | 1.29699800  | 0.74982700  |
| C  | 4.28846200  | 0.46135700  | 0.10326200  |
| C  | 3.05163800  | -0.17756300 | 0.11289900  |
| C  | 2.91741700  | -1.58062400 | -0.05974400 |
| C  | 4.06605100  | -2.36363300 | -0.24640600 |
| C  | 5.29894600  | -1.73374600 | -0.26712300 |
| C  | 5.40467400  | -0.34333400 | -0.09462300 |
| H  | 4.37236700  | 1.53076400  | 0.24871400  |
| H  | 3.98436900  | -3.43871700 | -0.37337400 |
| H  | 6.20049700  | -2.31945000 | -0.41423500 |
| H  | 6.38697500  | 0.11834700  | -0.11187900 |
| C  | 0.81097900  | -0.73946600 | 0.23319400  |
| H  | -0.10071700 | -0.75292700 | 1.29056700  |
| C  | 1.52701000  | -1.89711600 | 0.01082500  |
| H  | 1.09004100  | -2.88663100 | -0.03425700 |
| N  | 1.76153400  | 0.32081100  | 0.28467000  |
| C  | 1.30639000  | 1.57804100  | 0.55146600  |
| N  | -0.05407900 | 1.66116800  | 0.56640000  |
| C  | -0.58588700 | 2.82492300  | 0.96196500  |
| C  | 0.20893200  | 3.91651000  | 1.26978300  |
| C  | 1.58552200  | 3.74531500  | 1.12525100  |
| N  | 2.14405600  | 2.58548900  | 0.78049200  |
| H  | -1.67149600 | 2.86001800  | 1.01429800  |
| H  | -0.22356400 | 4.85595500  | 1.58864600  |
| H  | 2.27340800  | 4.56972300  | 1.29972000  |
| Co | -0.99393500 | 0.04369300  | -0.10113800 |

|                                              |              |             |                             |
|----------------------------------------------|--------------|-------------|-----------------------------|
| C                                            | -2.45863200  | -1.74437600 | 3.46334300                  |
| H                                            | -1.82020700  | -1.52603900 | 4.32341600                  |
| H                                            | -3.20744000  | -0.94927000 | 3.42565200                  |
| H                                            | -2.93717600  | -2.71184900 | 3.60674400                  |
| Zero-point correction=                       |              |             | 0.459832 (Hartree/Particle) |
| Thermal correction to Energy=                |              |             | 0.489141                    |
| Thermal correction to Enthalpy=              |              |             | 0.490085                    |
| Thermal correction to Gibbs Free Energy=     |              |             | 0.402083                    |
| Sum of electronic and zero-point Energies=   |              |             | -1390.709194                |
| Sum of electronic and thermal Energies=      |              |             | -1390.679886                |
| Sum of electronic and thermal Enthalpies=    |              |             | -1390.678942                |
| Sum of electronic and thermal Free Energies= |              |             | -1390.766944                |
| E(RM06L) =                                   | -1391.169026 | A.U.        |                             |

### A-TSe1

1 1

Number of imaginary frequencies: 1

|   |            |             |             |
|---|------------|-------------|-------------|
| C | 2.50041100 | -0.61192200 | -1.60072100 |
| C | 2.69224700 | -1.62134300 | -0.60132500 |
| C | 1.42859100 | -2.26356700 | -0.33908600 |
| C | 0.45175200 | -1.66699900 | -1.21859500 |
| C | 1.11973400 | -0.65922100 | -1.99401000 |
| O | 4.01590200 | 1.41405000  | 1.11136100  |
| O | 2.33659300 | 0.09737200  | 1.75240000  |
| C | 3.21177100 | 1.12992900  | 1.96801100  |
| C | 1.19121300 | -3.34454200 | 0.65032700  |
| H | 1.47491000 | -4.31847200 | 0.23520500  |
| H | 1.78249500 | -3.19378000 | 1.55708500  |

|   |             |             |             |
|---|-------------|-------------|-------------|
| H | 0.14018700  | -3.40195700 | 0.94128200  |
| C | 3.96908800  | -1.89353100 | 0.10056100  |
| H | 3.80965800  | -2.35091200 | 1.07846100  |
| H | 4.57195000  | -2.58877700 | -0.49537200 |
| H | 4.55134100  | -0.97965800 | 0.23695000  |
| C | 3.54581100  | 0.31565700  | -2.10555300 |
| H | 4.18135900  | 0.67225900  | -1.29090700 |
| H | 4.18778200  | -0.18407800 | -2.83978200 |
| H | 3.10809700  | 1.18966900  | -2.59316100 |
| C | 0.45834500  | 0.19627700  | -3.00846800 |
| H | 1.06135300  | 1.06573300  | -3.27339400 |
| H | 0.28804600  | -0.38382500 | -3.92282100 |
| H | -0.51911600 | 0.55320500  | -2.66829900 |
| C | -0.97852800 | -2.04125700 | -1.36286300 |
| H | -1.60663400 | -1.16413200 | -1.54968400 |
| H | -1.10558100 | -2.71185900 | -2.22057000 |
| H | -1.36430100 | -2.55698700 | -0.48068900 |
| C | -1.98858600 | 2.25520000  | -0.96004900 |
| C | -1.59790600 | 1.29882700  | -0.03596300 |
| C | -0.25226100 | 1.21162200  | 0.43121300  |
| C | 0.72796900  | 2.08837200  | -0.08979000 |
| C | 0.34074500  | 2.99998200  | -1.07838500 |
| C | -0.98775700 | 3.08437500  | -1.48860200 |
| H | -3.02350500 | 2.36305700  | -1.25574100 |
| H | 1.74017400  | 2.13200300  | 0.30510900  |
| H | 1.07516500  | 3.68585700  | -1.48955700 |
| H | -1.27088900 | 3.83502400  | -2.21982400 |

|                                              |             |             |                             |
|----------------------------------------------|-------------|-------------|-----------------------------|
| H                                            | 1.32545400  | 0.12841200  | 2.11385600                  |
| C                                            | -0.13388200 | 0.10803200  | 1.37323600                  |
| N                                            | -2.30514200 | 0.30065200  | 0.65522100                  |
| C                                            | -3.67821100 | -0.02113400 | 0.55249300                  |
| N                                            | -4.06970800 | -1.06381400 | 1.28504900                  |
| C                                            | -5.36717200 | -1.36258300 | 1.19944600                  |
| C                                            | -6.24959700 | -0.64380600 | 0.39894700                  |
| C                                            | -5.70554700 | 0.40774900  | -0.32657400                 |
| N                                            | -4.40989700 | 0.73468300  | -0.26096800                 |
| H                                            | -5.70297700 | -2.20905900 | 1.79486600                  |
| H                                            | -7.30180400 | -0.89381000 | 0.34148400                  |
| H                                            | -6.31816600 | 1.01816200  | -0.98655000                 |
| Co                                           | 1.27503800  | -0.30884000 | 0.00375600                  |
| C                                            | -1.41512700 | -0.41502900 | 1.42586200                  |
| H                                            | -1.79768000 | -1.27755200 | 1.95478700                  |
| C                                            | 3.04807700  | 1.80138300  | 3.29086200                  |
| H                                            | 2.05694500  | 2.26453200  | 3.34843900                  |
| H                                            | 3.10386200  | 1.07382400  | 4.10390000                  |
| H                                            | 3.81205000  | 2.56495700  | 3.42248800                  |
| Zero-point correction=                       |             |             | 0.459648 (Hartree/Particle) |
| Thermal correction to Energy=                |             |             | 0.489505                    |
| Thermal correction to Enthalpy=              |             |             | 0.490449                    |
| Thermal correction to Gibbs Free Energy=     |             |             | 0.399933                    |
| Sum of electronic and zero-point Energies=   |             |             | -1390.661888                |
| Sum of electronic and thermal Energies=      |             |             | -1390.632031                |
| Sum of electronic and thermal Enthalpies=    |             |             | -1390.631087                |
| Sum of electronic and thermal Free Energies= |             |             | -1390.721602                |

E(RM06L) = -1391.121536 A.U.

**A-TSfl**

1 1

Number of imaginary frequencies: 1

|   |             |             |             |
|---|-------------|-------------|-------------|
| C | -1.72373400 | -2.11734400 | -0.40450800 |
| C | -2.58727400 | -0.98631200 | -0.69776700 |
| C | -1.98797600 | -0.22673500 | -1.72497900 |
| C | -0.71835500 | -0.85212900 | -2.05485200 |
| C | -0.62015400 | -2.07220700 | -1.31078600 |
| O | -1.16136200 | -0.18775300 | 1.92446000  |
| O | -0.18366400 | 1.72268500  | 2.63678400  |
| C | -1.13381400 | 0.96936600  | 2.63489500  |
| C | -2.54045400 | 0.97455200  | -2.40180700 |
| H | -2.98159200 | 0.68244900  | -3.36148500 |
| H | -3.33060900 | 1.45832200  | -1.82272800 |
| H | -1.77114200 | 1.71911300  | -2.62486800 |
| C | -3.83429500 | -0.68182700 | 0.04728200  |
| H | -3.68289700 | -0.81053600 | 1.12362600  |
| H | -4.18815000 | 0.33637000  | -0.13311300 |
| H | -4.63821400 | -1.36473300 | -0.24872100 |
| C | -2.02643100 | -3.16225600 | 0.60835500  |
| H | -2.21896000 | -2.71884200 | 1.59053700  |
| H | -2.92173000 | -3.72706300 | 0.32632600  |
| H | -1.20876400 | -3.87788600 | 0.71341200  |
| C | 0.45377700  | -3.08254700 | -1.48089400 |
| H | 0.48559700  | -3.79931200 | -0.65967800 |
| H | 0.27385100  | -3.64015100 | -2.40717200 |

|   |             |             |             |
|---|-------------|-------------|-------------|
| H | 1.44318800  | -2.62452300 | -1.56305200 |
| C | 0.24431700  | -0.37902600 | -3.08404500 |
| H | 1.26709400  | -0.69027800 | -2.85391000 |
| H | -0.00594000 | -0.78824000 | -4.06987100 |
| H | 0.23662000  | 0.71051100  | -3.17776700 |
| C | 1.05031300  | -0.93084900 | 0.78896700  |
| C | 2.15902400  | -0.23156800 | 0.30065300  |
| C | 3.48049700  | -0.73071600 | 0.34143000  |
| C | 3.70833800  | -1.98004900 | 0.92738500  |
| C | 2.63268400  | -2.68578300 | 1.45892800  |
| C | 1.33307900  | -2.18046500 | 1.37207800  |
| H | 0.03557800  | -0.43772600 | 1.56399400  |
| H | 4.71421200  | -2.38606900 | 0.98026500  |
| H | 2.80360100  | -3.64213600 | 1.94333700  |
| H | 0.51148400  | -2.75394000 | 1.79727200  |
| C | 3.55583700  | 1.31300800  | -0.60969100 |
| H | 3.79434000  | 2.26563300  | -1.05410700 |
| C | 4.33356500  | 0.26151200  | -0.25045400 |
| H | 5.40433400  | 0.20071600  | -0.38008300 |
| N | 2.21767500  | 1.02743800  | -0.29584600 |
| C | 1.19379500  | 1.94246700  | -0.38598600 |
| N | 1.54580900  | 3.20439900  | -0.63495500 |
| C | 0.58506000  | 4.11926600  | -0.61147100 |
| C | -0.73971500 | 3.80592400  | -0.30849100 |
| C | -1.01899600 | 2.46724500  | -0.13214100 |
| N | -0.07647400 | 1.50806700  | -0.22012600 |
| H | 0.89056000  | 5.14002000  | -0.83079000 |

|                                              |              |             |                             |
|----------------------------------------------|--------------|-------------|-----------------------------|
| H                                            | -1.51328700  | 4.55910300  | -0.23452500                 |
| H                                            | -2.02732200  | 2.11372100  | 0.07239700                  |
| Co                                           | -0.68946100  | -0.38850100 | -0.09136400                 |
| C                                            | -2.40177400  | 1.18334000  | 3.40668000                  |
| H                                            | -3.24077800  | 1.31250700  | 2.71493100                  |
| H                                            | -2.63283500  | 0.30754100  | 4.01694000                  |
| H                                            | -2.31556000  | 2.06497500  | 4.03950400                  |
| Zero-point correction=                       |              |             | 0.459948 (Hartree/Particle) |
| Thermal correction to Energy=                |              |             | 0.489131                    |
| Thermal correction to Enthalpy=              |              |             | 0.490075                    |
| Thermal correction to Gibbs Free Energy=     |              |             | 0.402476                    |
| Sum of electronic and zero-point Energies=   |              |             | -1390.701455                |
| Sum of electronic and thermal Energies=      |              |             | -1390.672273                |
| Sum of electronic and thermal Enthalpies=    |              |             | -1390.671328                |
| Sum of electronic and thermal Free Energies= |              |             | -1390.758928                |
| E(RM06L) =                                   | -1391.161404 | A.U.        |                             |

## A-TSa2

1 1

Number of imaginary frequencies: 1

|   |             |             |             |
|---|-------------|-------------|-------------|
| C | -4.16991200 | -0.45693700 | -1.03568800 |
| C | -5.40367800 | 0.05459700  | -0.56841700 |
| C | -5.85735600 | 1.31591800  | -0.99601600 |
| C | -6.17258800 | -0.68608700 | 0.34777700  |
| C | -7.05841400 | 1.81841000  | -0.51543200 |
| H | -5.25989800 | 1.88364000  | -1.70346600 |
| C | -7.37182200 | -0.17197100 | 0.82013100  |
| H | -5.81928200 | -1.66089500 | 0.67142200  |

|   |             |             |             |
|---|-------------|-------------|-------------|
| C | -7.81653000 | 1.07763400  | 0.39060100  |
| H | -7.40853900 | 2.78933500  | -0.85183900 |
| H | -7.96474000 | -0.74861300 | 1.52308700  |
| H | -8.75716900 | 1.47390300  | 0.76045000  |
| C | -3.09391400 | -0.89247400 | -1.41986800 |
| P | -1.47687300 | -1.44389200 | -1.76918900 |
| C | -0.09575400 | 0.68986000  | -0.29033000 |
| C | -0.63668400 | 2.03491800  | -0.19270700 |
| C | 0.06212100  | 3.18102200  | -0.59922400 |
| C | -1.97623800 | 2.15722800  | 0.21647500  |
| C | -0.56664900 | 4.41921800  | -0.58738500 |
| H | 1.08895000  | 3.09390900  | -0.93986800 |
| C | -2.59309700 | 3.40232900  | 0.24239600  |
| H | -2.52382100 | 1.26186400  | 0.50301900  |
| C | -1.88847100 | 4.53530300  | -0.15745300 |
| H | -0.02319800 | 5.29899000  | -0.91752000 |
| H | -3.62423300 | 3.48408800  | 0.57362600  |
| H | -2.36886400 | 5.50882400  | -0.13906300 |
| C | -0.47532000 | -0.48498000 | -0.65379200 |
| C | -1.07448400 | -0.75381500 | -3.38915400 |
| H | -1.25048600 | 0.32455000  | -3.40705100 |
| H | -0.02191900 | -0.94914600 | -3.61161200 |
| H | -1.69110900 | -1.23373300 | -4.15185800 |
| O | -1.25287800 | -2.91886400 | -1.62319200 |
| C | 3.32272400  | 2.42797200  | 0.60460500  |
| C | 3.76583000  | 1.60406500  | -0.45996900 |
| C | 4.91252800  | 1.88379300  | -1.19654300 |

|   |             |             |             |
|---|-------------|-------------|-------------|
| C | 5.62086400  | 3.02858300  | -0.84417700 |
| C | 5.19849500  | 3.86499700  | 0.19988300  |
| C | 4.05400200  | 3.57830400  | 0.92868500  |
| C | 2.12483600  | 1.85320800  | 1.13211200  |
| C | 1.82966800  | 0.70375100  | 0.43703900  |
| H | 5.23082100  | 1.24168100  | -2.00763700 |
| H | 6.52034800  | 3.28037800  | -1.39703800 |
| H | 5.77876100  | 4.75086000  | 0.43821200  |
| H | 3.72971000  | 4.22719800  | 1.73689000  |
| H | 1.50322400  | 2.29188000  | 1.90189100  |
| C | 2.89312500  | -0.59949200 | -1.27902400 |
| N | 3.76650000  | -0.74769300 | -2.27251300 |
| C | 3.69371400  | -1.89499400 | -2.94723800 |
| C | 2.74519000  | -2.87896000 | -2.67620100 |
| C | 1.87954200  | -2.64079200 | -1.61983700 |
| N | 1.97182700  | -1.51880800 | -0.88894700 |
| H | 4.41930200  | -2.02017100 | -3.74830000 |
| H | 2.67648700  | -3.78868800 | -3.25882200 |
| H | 1.07430100  | -3.32000300 | -1.35490800 |
| N | 2.84633500  | 0.55155600  | -0.54927800 |
| C | 1.49929700  | -1.10999700 | 2.68344000  |
| C | 0.09123000  | -0.81576500 | 2.57602500  |
| C | -0.54373300 | -1.91978500 | 1.90768200  |
| C | 0.46563700  | -2.84602200 | 1.52558700  |
| C | 1.73591800  | -2.32905300 | 1.99921900  |
| C | 3.06231900  | -2.97442600 | 1.81811000  |
| H | 3.86319800  | -2.23312800 | 1.74262800  |

|                                              |             |             |                             |
|----------------------------------------------|-------------|-------------|-----------------------------|
| H                                            | 3.29811700  | -3.62113700 | 2.67069200                  |
| H                                            | 3.09449400  | -3.59973800 | 0.92206400                  |
| C                                            | 2.52677600  | -0.31451700 | 3.40253000                  |
| H                                            | 2.77257700  | -0.80375800 | 4.35168800                  |
| H                                            | 3.45359500  | -0.22485400 | 2.82910600                  |
| H                                            | 2.18248100  | 0.69502900  | 3.63143600                  |
| C                                            | -0.61095400 | 0.35469600  | 3.16406400                  |
| H                                            | -1.44893600 | 0.68064700  | 2.54168900                  |
| H                                            | -1.01817300 | 0.10462500  | 4.15051800                  |
| H                                            | 0.05674100  | 1.20931400  | 3.29675200                  |
| C                                            | -2.00125400 | -2.05572000 | 1.65459600                  |
| H                                            | -2.20293900 | -2.72507900 | 0.81413200                  |
| H                                            | -2.50001500 | -2.46398900 | 2.54131700                  |
| H                                            | -2.46718300 | -1.08863900 | 1.43860800                  |
| C                                            | 0.23824200  | -4.17887800 | 0.90647700                  |
| H                                            | -0.13580800 | -4.87697000 | 1.66442200                  |
| H                                            | -0.49715600 | -4.13272800 | 0.09846900                  |
| H                                            | 1.16338600  | -4.60981600 | 0.51557800                  |
| Co                                           | 0.86182300  | -0.97676200 | 0.68503500                  |
| Zero-point correction=                       |             |             | 0.648182 (Hartree/Particle) |
| Thermal correction to Energy=                |             |             | 0.690459                    |
| Thermal correction to Enthalpy=              |             |             | 0.691403                    |
| Thermal correction to Gibbs Free Energy=     |             |             | 0.573025                    |
| Sum of electronic and zero-point Energies=   |             |             | -2233.530450                |
| Sum of electronic and thermal Energies=      |             |             | -2233.488174                |
| Sum of electronic and thermal Enthalpies=    |             |             | -2233.487229                |
| Sum of electronic and thermal Free Energies= |             |             | -2233.605607                |

E(RM06L) = -2234.178632 A.U.

**A-TSb2**

1 1

Number of imaginary frequencies: 1

|   |             |            |             |
|---|-------------|------------|-------------|
| C | -3.24218400 | 1.90045200 | 0.24507400  |
| C | -4.60990600 | 1.82787200 | -0.10951600 |
| C | -5.55714200 | 1.40933300 | 0.84094000  |
| C | -5.02367800 | 2.12340300 | -1.42015300 |
| C | -6.89124700 | 1.28602300 | 0.47916500  |
| H | -5.22844900 | 1.17178800 | 1.84804000  |
| C | -6.36030800 | 1.99408100 | -1.77022400 |
| H | -4.28593900 | 2.44296100 | -2.15072900 |
| C | -7.29468000 | 1.57515700 | -0.82367100 |
| H | -7.62004600 | 0.96142200 | 1.21542500  |
| H | -6.67674600 | 2.22275300 | -2.78328800 |
| H | -8.33977300 | 1.47712300 | -1.10155600 |
| C | -2.05495800 | 1.92172000 | 0.53248100  |
| P | -0.45924000 | 1.88861400 | 1.20966800  |
| C | 1.94893300  | 1.24416400 | -0.08198000 |
| C | 3.13542700  | 2.03678400 | 0.05164200  |
| C | 3.28375500  | 3.21138000 | -0.70790700 |
| C | 4.15237300  | 1.67162700 | 0.94975100  |
| C | 4.42657400  | 3.98947100 | -0.57366500 |
| H | 2.49783600  | 3.49483900 | -1.40350500 |
| C | 5.28629100  | 2.46162700 | 1.08531300  |
| H | 4.03042900  | 0.77571000 | 1.55228900  |
| C | 5.43129100  | 3.61704100 | 0.31793600  |

|   |             |             |             |
|---|-------------|-------------|-------------|
| H | 4.53281200  | 4.89227900  | -1.16711400 |
| H | 6.05903700  | 2.17742400  | 1.79301900  |
| H | 6.32226600  | 4.22833300  | 0.41927100  |
| C | 0.67398700  | 1.17150800  | -0.01113300 |
| C | 0.10431600  | 3.60453600  | 1.23232500  |
| H | 1.14755600  | 3.64673700  | 1.55370000  |
| H | 0.00350000  | 4.07183000  | 0.25026600  |
| H | -0.50681500 | 4.15364200  | 1.95149500  |
| O | -0.34936200 | 1.15811800  | 2.51191700  |
| C | -2.59376200 | -1.06260900 | -0.92759700 |
| C | -2.30311000 | -1.52962100 | 0.37770100  |
| C | -3.26299400 | -2.10412100 | 1.20133800  |
| C | -4.54839000 | -2.22693600 | 0.67685200  |
| C | -4.85806000 | -1.79039000 | -0.61784000 |
| C | -3.89278300 | -1.20523900 | -1.42668500 |
| C | -1.39373800 | -0.49313800 | -1.47111500 |
| C | -0.38511900 | -0.65971400 | -0.55880200 |
| H | -3.01762300 | -2.43681300 | 2.20198300  |
| H | -5.32600000 | -2.67172200 | 1.29026900  |
| H | -5.87324200 | -1.89801700 | -0.98835200 |
| H | -4.14257500 | -0.85214600 | -2.42340800 |
| H | -1.30108500 | -0.00013400 | -2.42950200 |
| C | -0.12593900 | -1.52561000 | 1.65308200  |
| N | -0.61654900 | -2.02153800 | 2.78418700  |
| C | 0.24085800  | -2.12592800 | 3.79516400  |
| C | 1.58133500  | -1.75261800 | 3.70135400  |
| C | 2.01215700  | -1.31298200 | 2.46216100  |

|   |             |             |             |
|---|-------------|-------------|-------------|
| N | 1.17986300  | -1.22154300 | 1.41989500  |
| H | -0.16278900 | -2.52923700 | 4.72146400  |
| H | 2.25872700  | -1.82002200 | 4.54267800  |
| H | 3.04723300  | -1.03776400 | 2.27245600  |
| N | -0.93757900 | -1.27987400 | 0.58429400  |
| C | 1.43362300  | -2.25541100 | -1.91744800 |
| C | 1.87918200  | -1.01886100 | -2.50759700 |
| C | 3.13345700  | -0.67200900 | -1.90255300 |
| C | 3.40087300  | -1.60451000 | -0.85731900 |
| C | 2.34646400  | -2.59243500 | -0.88294300 |
| C | 2.24817300  | -3.78244500 | 0.00187800  |
| H | 1.20859600  | -4.04983500 | 0.21202500  |
| H | 2.71377900  | -4.65155800 | -0.47649200 |
| H | 2.75792000  | -3.62875200 | 0.95651500  |
| C | 0.26985100  | -3.08096400 | -2.33013400 |
| H | -0.43431600 | -2.52373100 | -2.94861800 |
| H | 0.61961200  | -3.94394900 | -2.90785800 |
| H | -0.28523300 | -3.46845800 | -1.47108700 |
| C | 1.26571700  | -0.29566200 | -3.65356300 |
| H | 1.15699800  | 0.77367400  | -3.44264700 |
| H | 1.88843200  | -0.38501300 | -4.55081600 |
| H | 0.27856700  | -0.69060400 | -3.89941200 |
| C | 4.03760300  | 0.39843400  | -2.39018500 |
| H | 4.75498500  | 0.72708800  | -1.63534400 |
| H | 4.60922100  | 0.00956800  | -3.24136100 |
| H | 3.49109600  | 1.27563400  | -2.74566500 |
| C | 4.64032800  | -1.67694700 | -0.03791600 |

|                                              |              |             |                             |
|----------------------------------------------|--------------|-------------|-----------------------------|
| H                                            | 5.38926700   | -2.30705400 | -0.53191500                 |
| H                                            | 5.09262100   | -0.69267500 | 0.10787500                  |
| H                                            | 4.46182900   | -2.12216600 | 0.94531400                  |
| Co                                           | 1.55460200   | -0.69575600 | -0.48295100                 |
| Zero-point correction=                       |              |             | 0.647390 (Hartree/Particle) |
| Thermal correction to Energy=                |              |             | 0.689836                    |
| Thermal correction to Enthalpy=              |              |             | 0.690780                    |
| Thermal correction to Gibbs Free Energy=     |              |             | 0.572586                    |
| Sum of electronic and zero-point Energies=   |              |             | -2233.519412                |
| Sum of electronic and thermal Energies=      |              |             | -2233.476966                |
| Sum of electronic and thermal Enthalpies=    |              |             | -2233.476021                |
| Sum of electronic and thermal Free Energies= |              |             | -2233.594215                |
| E(RM06L) =                                   | -2234.166802 | A.U.        |                             |

## A-TSc2

1 1

Number of imaginary frequencies: 1

|   |             |             |             |
|---|-------------|-------------|-------------|
| C | -2.85681400 | -1.08731400 | -0.96230800 |
| C | -4.15953600 | -0.64584300 | -1.22939000 |
| C | -4.35239100 | 0.45809400  | -2.09174900 |
| C | -5.28013800 | -1.29007000 | -0.65984700 |
| C | -5.63558700 | 0.90515700  | -2.36139800 |
| H | -3.48531400 | 0.93511500  | -2.53951700 |
| C | -6.55640800 | -0.83040200 | -0.93782000 |
| H | -5.12794200 | -2.14699600 | -0.00906500 |
| C | -6.73432900 | 0.26551300  | -1.78520700 |
| H | -5.78453100 | 1.74990800  | -3.02589500 |
| H | -7.41762000 | -1.32496800 | -0.50083400 |

|   |             |             |             |
|---|-------------|-------------|-------------|
| H | -7.73763600 | 0.61928600  | -2.00217100 |
| C | -1.67404300 | -1.38457200 | -0.70948400 |
| P | -0.25066100 | -2.25461800 | -1.37467700 |
| C | 0.93028500  | -1.37212700 | -0.33856300 |
| C | 3.29143100  | -1.36778400 | -1.50676700 |
| C | 3.70691700  | -0.43170000 | -2.47481200 |
| C | 4.02538300  | -2.55674900 | -1.32304300 |
| C | 4.82323700  | -0.69431400 | -3.25050800 |
| H | 3.13442800  | 0.48215200  | -2.60307300 |
| C | 5.14216500  | -2.80911600 | -2.10790600 |
| H | 3.69692300  | -3.27159000 | -0.57249800 |
| C | 5.53995700  | -1.87991300 | -3.06808700 |
| H | 5.13802700  | 0.01949700  | -4.00472700 |
| H | 5.70291100  | -3.72833400 | -1.97312500 |
| H | 6.41408800  | -2.07977800 | -3.68032200 |
| C | 2.11601100  | -1.15163800 | -0.75125000 |
| C | -0.38905400 | -3.92628200 | -0.70267400 |
| H | -0.56947600 | -3.90855800 | 0.37262600  |
| H | -1.21104800 | -4.43910800 | -1.20617900 |
| H | 0.53841900  | -4.46535900 | -0.91046300 |
| O | -0.07559500 | -2.17957800 | -2.85058700 |
| C | -0.87178200 | 3.13025500  | -0.76447900 |
| C | 0.47608600  | 3.25077400  | -0.36844000 |
| C | 1.19362100  | 4.42897500  | -0.55520300 |
| C | 0.52156000  | 5.50636300  | -1.12403000 |
| C | -0.82279000 | 5.41109100  | -1.50750500 |
| C | -1.52484900 | 4.22688800  | -1.33894900 |

|   |             |             |             |
|---|-------------|-------------|-------------|
| C | -1.27530700 | 1.79057700  | -0.47043000 |
| C | -0.22069100 | 1.08064900  | 0.04445300  |
| H | 2.22837300  | 4.52360000  | -0.25053400 |
| H | 1.05372200  | 6.44176400  | -1.26647400 |
| H | -1.31528500 | 6.27388100  | -1.94554200 |
| H | -2.56298100 | 4.14413100  | -1.65118000 |
| H | -2.27284700 | 1.39333000  | -0.59790000 |
| C | 2.13913100  | 1.76392900  | 0.64529300  |
| N | 2.65181100  | 2.76765000  | 1.37670100  |
| C | 3.88118600  | 2.61034200  | 1.85782200  |
| C | 4.63539100  | 1.45777000  | 1.64816800  |
| C | 4.02183900  | 0.47368700  | 0.89150700  |
| N | 2.79305000  | 0.61315500  | 0.39107100  |
| H | 4.27134500  | 3.44049800  | 2.44453500  |
| H | 5.63643000  | 1.33783200  | 2.04324200  |
| H | 4.52555400  | -0.46354900 | 0.64996600  |
| N | 0.88133100  | 1.97947200  | 0.10638600  |
| C | -0.67349500 | 0.33588200  | 2.67754000  |
| C | -1.85582700 | -0.38399200 | 2.34843600  |
| C | -1.52533400 | -1.79691900 | 2.30647100  |
| C | -0.14086600 | -1.93335100 | 2.53667400  |
| C | 0.40903400  | -0.61019100 | 2.73062200  |
| C | 1.79395100  | -0.35382600 | 3.20201700  |
| H | 2.08907500  | 0.69212400  | 3.08993100  |
| H | 1.86951200  | -0.59483400 | 4.26995700  |
| H | 2.52342500  | -0.97958100 | 2.68026800  |
| C | -0.59102800 | 1.79227500  | 2.96293900  |

|                                              |              |             |                             |
|----------------------------------------------|--------------|-------------|-----------------------------|
| H                                            | -1.28796600  | 2.36363200  | 2.34468700                  |
| H                                            | -0.84771700  | 1.97503900  | 4.01282800                  |
| H                                            | 0.40982000   | 2.19873500  | 2.79441300                  |
| C                                            | -3.21421600  | 0.20034500  | 2.19468000                  |
| H                                            | -3.89236700  | -0.47974200 | 1.67190500                  |
| H                                            | -3.66098100  | 0.41939000  | 3.17176200                  |
| H                                            | -3.18249400  | 1.14123500  | 1.63540400                  |
| C                                            | -2.52061900  | -2.88417400 | 2.10924200                  |
| H                                            | -2.05591800  | -3.87214100 | 2.07541500                  |
| H                                            | -3.23922600  | -2.89033300 | 2.93599200                  |
| H                                            | -3.09247500  | -2.75167800 | 1.18482100                  |
| C                                            | 0.66279800   | -3.18349400 | 2.63059000                  |
| H                                            | 1.11536700   | -3.27293700 | 3.62421300                  |
| H                                            | 0.05963200   | -4.08004200 | 2.47178100                  |
| H                                            | 1.48295700   | -3.19633200 | 1.90322200                  |
| Co                                           | -0.43237500  | -0.65037400 | 0.86254300                  |
| Zero-point correction=                       |              |             | 0.646809 (Hartree/Particle) |
| Thermal correction to Energy=                |              |             | 0.689304                    |
| Thermal correction to Enthalpy=              |              |             | 0.690249                    |
| Thermal correction to Gibbs Free Energy=     |              |             | 0.571492                    |
| Sum of electronic and zero-point Energies=   |              |             | -2233.478476                |
| Sum of electronic and thermal Energies=      |              |             | -2233.435981                |
| Sum of electronic and thermal Enthalpies=    |              |             | -2233.435037                |
| Sum of electronic and thermal Free Energies= |              |             | -2233.553793                |
| E(RM06L) =                                   | -2234.125285 | A.U.        |                             |

## A-TSd2

1 1

Number of imaginary frequencies: 1

|   |             |             |             |
|---|-------------|-------------|-------------|
| C | -3.03047500 | 1.71592900  | -0.99623400 |
| C | -4.13918900 | 0.87013400  | -1.23724200 |
| C | -5.39116900 | 1.14775600  | -0.66043700 |
| C | -3.98703200 | -0.25842800 | -2.06235700 |
| C | -6.46881700 | 0.31079000  | -0.91500800 |
| H | -5.50353900 | 2.02082100  | -0.02520600 |
| C | -5.07307600 | -1.08467200 | -2.30999400 |
| H | -3.01254100 | -0.47698400 | -2.48994600 |
| C | -6.31341400 | -0.80207500 | -1.74020500 |
| H | -7.43548400 | 0.52990400  | -0.47231100 |
| H | -4.94883800 | -1.95867200 | -2.94201000 |
| H | -7.16103700 | -1.45135500 | -1.93828100 |
| C | -2.06706800 | 2.44388500  | -0.80768000 |
| P | -0.66544400 | 3.43445900  | -0.54146500 |
| C | 1.47578700  | 1.35764900  | -0.74732100 |
| C | 2.39794300  | 0.82485900  | -1.71326500 |
| C | 2.03666300  | -0.37145700 | -2.38107000 |
| C | 3.62573100  | 1.45905100  | -2.02603400 |
| C | 2.91067800  | -0.92005900 | -3.33285000 |
| H | 1.02627900  | -0.75115500 | -2.27824700 |
| C | 4.44649800  | 0.91299600  | -2.99129800 |
| H | 3.88500800  | 2.38824900  | -1.52804100 |
| C | 4.10066100  | -0.28619100 | -3.64070300 |
| H | 2.61420400  | -1.82018300 | -3.86415900 |
| H | 5.36821200  | 1.42204100  | -3.25790400 |
| H | 4.75765700  | -0.69495500 | -4.40189100 |

|   |             |             |             |
|---|-------------|-------------|-------------|
| C | 0.61468700  | 2.18959600  | -0.38568300 |
| C | -0.21651400 | 4.10997600  | -2.15712900 |
| H | 0.74415900  | 4.62411000  | -2.08328800 |
| H | -0.16477900 | 3.33234600  | -2.92241800 |
| H | -0.97816900 | 4.83923500  | -2.44234300 |
| O | -0.73007300 | 4.42076100  | 0.57303400  |
| C | -1.61560300 | -2.47506100 | -0.46542000 |
| C | -2.01025600 | -1.60805000 | 0.57568800  |
| C | -3.28319200 | -1.66658300 | 1.13905100  |
| C | -4.14424500 | -2.65320900 | 0.67358100  |
| C | -3.75941600 | -3.54448600 | -0.33864400 |
| C | -2.50571000 | -3.45575800 | -0.92400000 |
| C | -0.28586900 | -2.09853700 | -0.83479500 |
| C | 0.12654700  | -1.02685000 | -0.07389100 |
| H | -3.58986900 | -0.98903500 | 1.92651200  |
| H | -5.13685600 | -2.73197000 | 1.10676500  |
| H | -4.45834400 | -4.30571200 | -0.67300500 |
| H | -2.21400600 | -4.13226400 | -1.72292500 |
| H | 0.33247400  | -2.61330600 | -1.56117300 |
| C | -0.96412400 | 0.23174600  | 1.82475100  |
| N | -1.53438900 | -0.16591600 | 2.97074100  |
| C | -1.61007200 | 0.73008800  | 3.95469300  |
| C | -1.09231800 | 2.01450000  | 3.84173700  |
| C | -0.50588300 | 2.33023600  | 2.62443900  |
| N | -0.45058000 | 1.45516900  | 1.61155000  |
| H | -2.09327100 | 0.39047100  | 4.86948000  |
| H | -1.15113700 | 2.73698300  | 4.64645900  |

|   |             |             |             |
|---|-------------|-------------|-------------|
| H | -0.10361000 | 3.31765600  | 2.41559300  |
| N | -0.94186600 | -0.71352300 | 0.79967200  |
| C | 2.11362400  | -1.69333600 | 1.70723400  |
| C | 2.92170700  | -2.17287300 | 0.62633200  |
| C | 3.95536000  | -1.18908000 | 0.37554600  |
| C | 3.72528800  | -0.07528400 | 1.21124300  |
| C | 2.57601800  | -0.37064600 | 2.03260900  |
| C | 2.11652000  | 0.47711600  | 3.15854600  |
| H | 1.13197500  | 0.18447500  | 3.52881500  |
| H | 2.82002200  | 0.37727500  | 3.99457300  |
| H | 2.08876900  | 1.53618600  | 2.88957200  |
| C | 1.06231200  | -2.46977400 | 2.41194800  |
| H | 0.48486100  | -3.09025400 | 1.72190100  |
| H | 1.53935700  | -3.13649700 | 3.13960300  |
| H | 0.35841100  | -1.83688800 | 2.95664700  |
| C | 2.80822500  | -3.49804400 | -0.03481800 |
| H | 3.07604500  | -3.44705200 | -1.09443500 |
| H | 3.48394300  | -4.22353500 | 0.43430400  |
| H | 1.79299100  | -3.89394100 | 0.03815800  |
| C | 5.07998300  | -1.38004900 | -0.57084700 |
| H | 5.53791700  | -0.43771100 | -0.87547100 |
| H | 5.85786600  | -1.97984900 | -0.08359700 |
| H | 4.77838000  | -1.92142300 | -1.47016100 |
| C | 4.51515500  | 1.18244700  | 1.27589700  |
| H | 5.16203700  | 1.19144300  | 2.16036300  |
| H | 5.15849700  | 1.30345400  | 0.40129400  |
| H | 3.86757000  | 2.06251300  | 1.34566100  |

|                                              |              |             |                             |
|----------------------------------------------|--------------|-------------|-----------------------------|
| Co                                           | 1.98219500   | -0.46396300 | 0.07025400                  |
| Zero-point correction=                       |              |             | 0.646288 (Hartree/Particle) |
| Thermal correction to Energy=                |              |             | 0.688932                    |
| Thermal correction to Enthalpy=              |              |             | 0.689876                    |
| Thermal correction to Gibbs Free Energy=     |              |             | 0.572708                    |
| Sum of electronic and zero-point Energies=   |              |             | -2233.457594                |
| Sum of electronic and thermal Energies=      |              |             | -2233.414950                |
| Sum of electronic and thermal Enthalpies=    |              |             | -2233.414006                |
| Sum of electronic and thermal Free Energies= |              |             | -2233.531173                |
| E(RM06L) =                                   | -2234.103881 | A.U.        |                             |

### A-TSa3

1 1

Number of imaginary frequencies: 1

|   |             |            |             |
|---|-------------|------------|-------------|
| C | 1.36271100  | 1.33579900 | -0.75405300 |
| C | 1.71514000  | 2.77013500 | -0.73855000 |
| C | 0.86041000  | 3.73141000 | -1.31390800 |
| C | 2.84771300  | 3.24767100 | -0.03984600 |
| C | 1.15076200  | 5.08576500 | -1.23358100 |
| H | -0.01294200 | 3.41830500 | -1.87308400 |
| C | 3.11766300  | 4.60536800 | 0.06055400  |
| H | 3.50032700  | 2.55611100 | 0.47809000  |
| C | 2.27484900  | 5.53420700 | -0.54356700 |
| H | 0.48563000  | 5.79766400 | -1.71224800 |
| H | 3.98467300  | 4.93652900 | 0.62382800  |
| H | 2.48571700  | 6.59646100 | -0.46700500 |
| C | 0.05648800  | 0.80379500 | -0.78256200 |
| P | -1.09364900 | 1.06705800 | -1.99423000 |

|   |             |             |             |
|---|-------------|-------------|-------------|
| C | -3.42132800 | -0.18272700 | 0.07358200  |
| C | -2.21759300 | -0.18891800 | 0.34538200  |
| C | -1.94762300 | -0.40261900 | -2.61177800 |
| H | -1.52486100 | -0.57245100 | -3.60633300 |
| H | -1.82868900 | -1.27367900 | -1.97457400 |
| H | -3.01254200 | -0.18631800 | -2.72172200 |
| O | -1.02329500 | 2.08608600  | -3.09189300 |
| C | 4.47420600  | -0.63976700 | -0.84558500 |
| C | 3.51619800  | -1.64753800 | -0.60378200 |
| C | 3.89159500  | -2.97133700 | -0.39003400 |
| C | 5.24762300  | -3.26650500 | -0.44486000 |
| C | 6.21391900  | -2.27803000 | -0.70616700 |
| C | 5.84084100  | -0.96280900 | -0.90469600 |
| C | 3.76847400  | 0.57759500  | -0.94400300 |
| C | 2.41483600  | 0.35476600  | -0.72872300 |
| H | 3.16318000  | -3.75120200 | -0.19676600 |
| H | 5.56821200  | -4.29057800 | -0.28145000 |
| H | 7.26182900  | -2.55612800 | -0.74300800 |
| H | 6.57987200  | -0.18980400 | -1.09045300 |
| H | 4.19910300  | 1.53892700  | -1.17704500 |
| C | 1.13832800  | -1.90722000 | -0.83251100 |
| N | 0.01020700  | -1.82573300 | -0.09420200 |
| C | -0.90049700 | -2.80544000 | -0.24131100 |
| C | -0.71400100 | -3.84764500 | -1.13389400 |
| C | 0.42823900  | -3.78205200 | -1.92282700 |
| N | 1.34849200  | -2.82944700 | -1.76671600 |
| H | -1.80347700 | -2.68935600 | 0.35302000  |

|   |             |             |             |
|---|-------------|-------------|-------------|
| H | -1.44853700 | -4.63672300 | -1.23763400 |
| H | 0.61992700  | -4.50528300 | -2.71246000 |
| N | 2.23889300  | -1.05987300 | -0.55833000 |
| C | 0.47796400  | -0.97981100 | 2.65520500  |
| C | 1.04641700  | 0.29878900  | 2.38470500  |
| C | -0.02787900 | 1.25788800  | 2.37322200  |
| C | -1.23800000 | 0.57335600  | 2.68038500  |
| C | -0.93833300 | -0.83104100 | 2.81756800  |
| C | -1.91820200 | -1.89635000 | 3.15795300  |
| H | -1.54991700 | -2.88992400 | 2.88630900  |
| H | -2.12103300 | -1.91617100 | 4.23470400  |
| H | -2.87083500 | -1.73298600 | 2.64467500  |
| C | 1.24298500  | -2.25190600 | 2.74512300  |
| H | 2.13297100  | -2.23391600 | 2.10808000  |
| H | 1.58575500  | -2.41843500 | 3.77248900  |
| H | 0.63725000  | -3.11845600 | 2.46561700  |
| C | 2.50361100  | 0.59143500  | 2.38737800  |
| H | 2.71860900  | 1.57983400  | 1.98114900  |
| H | 2.87877700  | 0.57922900  | 3.41751000  |
| H | 3.08719500  | -0.14588500 | 1.82814100  |
| C | 0.06921500  | 2.73075500  | 2.18458700  |
| H | -0.56810800 | 3.07222000  | 1.36116000  |
| H | -0.26416200 | 3.25464200  | 3.08694000  |
| H | 1.08774500  | 3.05648500  | 1.96711900  |
| C | -2.54784000 | 1.22718800  | 2.92980400  |
| H | -2.56318300 | 1.62327700  | 3.95261500  |
| H | -2.71681000 | 2.06394200  | 2.24815300  |

|                                              |              |             |                            |
|----------------------------------------------|--------------|-------------|----------------------------|
| H                                            | -3.38165000  | 0.53224700  | 2.82049300                 |
| Co                                           | -0.43130000  | -0.22291000 | 0.91633200                 |
| C                                            | -4.78602900  | -0.22548200 | -0.31777800                |
| C                                            | -5.69497000  | 0.76507900  | 0.09840900                 |
| C                                            | -5.25495100  | -1.26932900 | -1.13965100                |
| C                                            | -7.02441900  | 0.70993000  | -0.29733500                |
| H                                            | -5.34086900  | 1.57504300  | 0.73016600                 |
| C                                            | -6.58623000  | -1.31741800 | -1.53020700                |
| H                                            | -4.55761700  | -2.04082600 | -1.46025500                |
| C                                            | -7.47474300  | -0.32858400 | -1.11131000                |
| H                                            | -7.71478100  | 1.48169600  | 0.02955500                 |
| H                                            | -6.93368100  | -2.12849700 | -2.16320700                |
| H                                            | -8.51531100  | -0.36705400 | -1.41825500                |
| Zero-point correction=                       |              |             | 0.649601(Hartree/Particle) |
| Thermal correction to Energy=                |              |             | 0.691052                   |
| Thermal correction to Enthalpy=              |              |             | 0.691996                   |
| Thermal correction to Gibbs Free Energy=     |              |             | 0.577026                   |
| Sum of electronic and zero-point Energies=   |              |             | -2233.485670               |
| Sum of electronic and thermal Energies=      |              |             | -2233.444219               |
| Sum of electronic and thermal Enthalpies=    |              |             | -2233.443275               |
| Sum of electronic and thermal Free Energies= |              |             | -2233.558245               |
| E(RM06L) =                                   | -2234.135271 | A.U.        |                            |

### A-TSb3

1 1

Number of imaginary frequencies: 1

|   |            |            |             |
|---|------------|------------|-------------|
| C | 1.42348900 | 1.30997100 | -0.27359700 |
| C | 2.09852600 | 2.64096800 | -0.33535500 |

|   |             |             |             |
|---|-------------|-------------|-------------|
| C | 1.90110200  | 3.58107000  | 0.68339000  |
| C | 2.89316300  | 2.98900200  | -1.43407500 |
| C | 2.46989500  | 4.84800200  | 0.60064200  |
| H | 1.30881500  | 3.30049000  | 1.55399500  |
| C | 3.44740000  | 4.26007200  | -1.52322000 |
| H | 3.04891100  | 2.26623000  | -2.23023500 |
| C | 3.23720200  | 5.19214100  | -0.50888000 |
| H | 2.32045200  | 5.56288800  | 1.40455000  |
| H | 4.04182300  | 4.52671200  | -2.39164800 |
| H | 3.67490000  | 6.18289500  | -0.58125000 |
| C | 0.05955400  | 1.36798700  | -0.06174300 |
| P | -0.87677000 | 2.78236700  | -0.61601000 |
| C | -2.44334600 | 0.20601100  | -0.43690400 |
| C | -3.84885100 | -0.00698900 | -0.70689000 |
| C | -4.68501100 | 1.10606600  | -0.91837100 |
| C | -4.41580400 | -1.29004100 | -0.76362000 |
| C | -6.03945400 | 0.93424800  | -1.16531000 |
| H | -4.25721900 | 2.10463500  | -0.87755600 |
| C | -5.77055100 | -1.45956600 | -1.02284100 |
| H | -3.78058300 | -2.15730000 | -0.60903300 |
| C | -6.58673200 | -0.34772800 | -1.21853600 |
| H | -6.67221800 | 1.80276900  | -1.31968600 |
| H | -6.19118200 | -2.45940300 | -1.07018200 |
| H | -7.64637000 | -0.47853900 | -1.41418200 |
| C | -1.61650000 | 1.19356800  | -0.62554900 |
| C | -1.65636700 | 3.79525600  | 0.66355100  |
| H | -2.45905900 | 4.37058200  | 0.19743200  |

|   |             |             |             |
|---|-------------|-------------|-------------|
| H | -2.06154700 | 3.19033000  | 1.47549900  |
| H | -0.91992100 | 4.50057700  | 1.05665600  |
| O | -0.52890500 | 3.53105400  | -1.85624400 |
| C | 4.28803200  | -0.95126400 | 0.05789300  |
| C | 3.30649800  | -1.87413100 | -0.35953600 |
| C | 3.57651300  | -3.23801000 | -0.45281600 |
| C | 4.85630600  | -3.65987800 | -0.11560100 |
| C | 5.84593000  | -2.75474800 | 0.30265000  |
| C | 5.57364700  | -1.40173500 | 0.39590000  |
| C | 3.67996000  | 0.32845400  | 0.05668300  |
| C | 2.35125000  | 0.20675400  | -0.29682100 |
| H | 2.82951300  | -3.94794700 | -0.78793600 |
| H | 5.09471200  | -4.71682300 | -0.18015400 |
| H | 6.83364900  | -3.12638400 | 0.55538300  |
| H | 6.33259700  | -0.69773000 | 0.72285500  |
| H | 4.14306100  | 1.26107200  | 0.34579200  |
| C | 1.10126800  | -1.68176400 | -1.38466900 |
| N | 1.51984200  | -2.47432900 | -2.37041600 |
| C | 0.60947800  | -2.97803100 | -3.19609500 |
| C | -0.74029200 | -2.66894500 | -3.07655000 |
| C | -1.08982100 | -1.86180400 | -2.01174900 |
| N | -0.19232800 | -1.38098900 | -1.12453500 |
| H | 0.98225000  | -3.63186700 | -3.98195100 |
| H | -1.48942100 | -3.04333000 | -3.76294500 |
| H | -2.12367900 | -1.59415700 | -1.83177300 |
| N | 2.09929700  | -1.17207200 | -0.55384700 |
| C | 0.25694900  | -0.74071500 | 2.32106300  |

|                               |             |             |                             |
|-------------------------------|-------------|-------------|-----------------------------|
| C                             | -0.91574300 | 0.05894700  | 2.56409300                  |
| C                             | -2.07621600 | -0.71622500 | 2.25111100                  |
| C                             | -1.62676200 | -1.97571500 | 1.73557600                  |
| C                             | -0.18609900 | -1.98825800 | 1.81876500                  |
| C                             | 0.64260900  | -3.17302000 | 1.48070700                  |
| H                             | 1.71005600  | -2.94885700 | 1.45881400                  |
| H                             | 0.48300700  | -3.95497600 | 2.23213900                  |
| H                             | 0.35986800  | -3.61192300 | 0.51675000                  |
| C                             | 1.63859800  | -0.34994400 | 2.69987600                  |
| H                             | 1.85741800  | 0.68736900  | 2.42868800                  |
| H                             | 1.76335100  | -0.43234800 | 3.78621500                  |
| H                             | 2.39400600  | -0.98738400 | 2.23372300                  |
| C                             | -0.89433200 | 1.40861200  | 3.18352700                  |
| H                             | -1.88130500 | 1.87553100  | 3.19203600                  |
| H                             | -0.56245100 | 1.33633300  | 4.22568900                  |
| H                             | -0.19507400 | 2.07749000  | 2.67073000                  |
| C                             | -3.48055800 | -0.28688000 | 2.48349200                  |
| H                             | -4.19769200 | -0.90031000 | 1.93476000                  |
| H                             | -3.72075600 | -0.36225800 | 3.54979500                  |
| H                             | -3.64608300 | 0.75330900  | 2.18598600                  |
| C                             | -2.44793500 | -3.17128300 | 1.39815800                  |
| H                             | -2.29395300 | -3.96113000 | 2.14265600                  |
| H                             | -3.51529800 | -2.94400000 | 1.38361700                  |
| H                             | -2.17769900 | -3.60170200 | 0.42723800                  |
| Co                            | -0.90421300 | -0.44947400 | 0.55330100                  |
| Zero-point correction=        |             |             | 0.649797 (Hartree/Particle) |
| Thermal correction to Energy= |             |             | 0.690733                    |

|                                              |              |
|----------------------------------------------|--------------|
| Thermal correction to Enthalpy=              | 0.691677     |
| Thermal correction to Gibbs Free Energy=     | 0.578288     |
| Sum of electronic and zero-point Energies=   | -2233.516972 |
| Sum of electronic and thermal Energies=      | -2233.476036 |
| Sum of electronic and thermal Enthalpies=    | -2233.475092 |
| Sum of electronic and thermal Free Energies= | -2233.588481 |

E(RM06L) = -2234.166769 A.U.

#### A-TS4

1 1

Number of imaginary frequencies: 1

|   |             |            |             |
|---|-------------|------------|-------------|
| C | -1.78954300 | 1.47263400 | 0.13589600  |
| C | -2.65758600 | 2.64449400 | -0.07359400 |
| C | -2.35462400 | 3.58909700 | -1.06934600 |
| C | -3.78344200 | 2.86015300 | 0.73632000  |
| C | -3.14197100 | 4.72262800 | -1.23790000 |
| H | -1.53472500 | 3.39428000 | -1.75839200 |
| C | -4.56288000 | 3.99832900 | 0.57048800  |
| H | -4.02047400 | 2.14229000 | 1.51647900  |
| C | -4.24379700 | 4.93335300 | -0.41279700 |
| H | -2.90579100 | 5.43249600 | -2.02463300 |
| H | -5.41841400 | 4.16132000 | 1.21847700  |
| H | -4.85766700 | 5.81933200 | -0.54101100 |
| C | -0.41973800 | 1.68053200 | 0.15516700  |
| P | 0.54743200  | 3.11623700 | 0.15295300  |
| C | 2.00726900  | 0.45717800 | 0.26347900  |
| C | 3.34754200  | 0.80041900 | 0.66428600  |
| C | 3.69677500  | 2.05555600 | 1.20637600  |

|   |             |             |             |
|---|-------------|-------------|-------------|
| C | 4.35270700  | -0.18026900 | 0.55578100  |
| C | 5.00717500  | 2.31498800  | 1.58456100  |
| H | 2.93838500  | 2.81610500  | 1.36470700  |
| C | 5.65917600  | 0.08318000  | 0.93860500  |
| H | 4.07194700  | -1.15346900 | 0.16338900  |
| C | 5.99300000  | 1.33785400  | 1.44783400  |
| H | 5.25950200  | 3.28560400  | 2.00069700  |
| H | 6.41872100  | -0.68727300 | 0.84391400  |
| H | 7.01424700  | 1.54916900  | 1.74976500  |
| C | 0.78991500  | 0.97363200  | 0.12970400  |
| C | 1.43054400  | 3.49560800  | -1.37071900 |
| H | 2.50144700  | 3.33057700  | -1.21677900 |
| H | 1.07033400  | 2.86882600  | -2.18762500 |
| H | 1.27962300  | 4.54987200  | -1.61399600 |
| O | 0.97081800  | 3.87560200  | 1.36364800  |
| C | -3.92774900 | -1.50161200 | 0.07809100  |
| C | -2.75700100 | -2.00246500 | 0.69799200  |
| C | -2.64242200 | -3.32455200 | 1.12388400  |
| C | -3.71969400 | -4.16326500 | 0.87291500  |
| C | -4.87911100 | -3.69867400 | 0.22224600  |
| C | -4.99700200 | -2.37936600 | -0.17411000 |
| C | -3.70180400 | -0.12785400 | -0.16468300 |
| C | -2.42401300 | 0.19809400  | 0.27451900  |
| H | -1.75144300 | -3.68722500 | 1.63058100  |
| H | -3.66742300 | -5.20101800 | 1.18700100  |
| H | -5.69493300 | -4.39054700 | 0.04044400  |
| H | -5.89725300 | -2.02213700 | -0.66467000 |

|   |             |             |             |
|---|-------------|-------------|-------------|
| H | -4.36738800 | 0.56445500  | -0.66124100 |
| C | -0.78222300 | -1.10149300 | 1.72253800  |
| N | -1.12106400 | -0.93864400 | 2.99339000  |
| C | -0.18520400 | -1.22184500 | 3.90413400  |
| C | 1.06773300  | -1.71333200 | 3.55154100  |
| C | 1.34051800  | -1.80492000 | 2.19664600  |
| N | 0.42390300  | -1.47961200 | 1.26643000  |
| H | -0.45864400 | -1.05349900 | 4.94316700  |
| H | 1.81269000  | -1.97479400 | 4.29311700  |
| H | 2.31297200  | -2.10746800 | 1.81644400  |
| N | -1.81908900 | -0.97708600 | 0.76290800  |
| C | -0.04482600 | -1.83758600 | -2.12308100 |
| C | 0.76058100  | -0.76150800 | -2.59650600 |
| C | 2.14665400  | -1.04899800 | -2.30655400 |
| C | 2.19972300  | -2.31200400 | -1.63613100 |
| C | 0.84149500  | -2.76658600 | -1.49250700 |
| C | 0.44568700  | -4.03948900 | -0.83226900 |
| H | -0.59820100 | -4.02284900 | -0.50725300 |
| H | 0.55994600  | -4.88164700 | -1.52464100 |
| H | 1.07103600  | -4.25911500 | 0.03894700  |
| C | -1.50571900 | -1.99722700 | -2.35470900 |
| H | -2.06063000 | -1.07290800 | -2.16394800 |
| H | -1.69968000 | -2.27883600 | -3.39689400 |
| H | -1.93968300 | -2.77918600 | -1.72665700 |
| C | 0.23887400  | 0.43471100  | -3.31245200 |
| H | 1.02214500  | 1.17514800  | -3.49320800 |
| H | -0.16417200 | 0.15095700  | -4.29134900 |

|                                              |              |             |                             |
|----------------------------------------------|--------------|-------------|-----------------------------|
| H                                            | -0.58008500  | 0.91509200  | -2.76221000                 |
| C                                            | 3.29950700   | -0.20459600 | -2.72375500                 |
| H                                            | 4.20745100   | -0.44418900 | -2.16569800                 |
| H                                            | 3.51787700   | -0.34250600 | -3.78876800                 |
| H                                            | 3.09972000   | 0.86082900  | -2.56927100                 |
| C                                            | 3.40536300   | -3.11785000 | -1.29185700                 |
| H                                            | 3.48542900   | -3.99158300 | -1.94972000                 |
| H                                            | 4.32911100   | -2.54645700 | -1.41005800                 |
| H                                            | 3.37843300   | -3.50381900 | -0.26674000                 |
| Co                                           | 1.06822100   | -0.92883300 | -0.57944900                 |
| Zero-point correction=                       |              |             | 0.648251 (Hartree/Particle) |
| Thermal correction to Energy=                |              |             | 0.690386                    |
| Thermal correction to Enthalpy=              |              |             | 0.691330                    |
| Thermal correction to Gibbs Free Energy=     |              |             | 0.573449                    |
| Sum of electronic and zero-point Energies=   |              |             | -2233.525114                |
| Sum of electronic and thermal Energies=      |              |             | -2233.482979                |
| Sum of electronic and thermal Enthalpies=    |              |             | -2233.482035                |
| Sum of electronic and thermal Free Energies= |              |             | -2233.599916                |
| E(RM06L) =                                   | -2234.173365 | A.U.        |                             |

**(S)A-TS5**

1 1

Number of imaginary frequencies: 1

|   |            |             |             |
|---|------------|-------------|-------------|
| C | 1.98137600 | -1.23595500 | 0.02678200  |
| C | 3.04782400 | -2.24111300 | -0.10034000 |
| C | 2.96424200 | -3.23764700 | -1.08432000 |
| C | 4.16749200 | -2.21974200 | 0.74568600  |
| C | 3.95715200 | -4.19919400 | -1.20756900 |

|   |             |             |             |
|---|-------------|-------------|-------------|
| H | 2.12742100  | -3.22174700 | -1.78100800 |
| C | 5.15582900  | -3.18848300 | 0.62774400  |
| H | 4.23693600  | -1.45387800 | 1.51370800  |
| C | 5.05214200  | -4.18068100 | -0.34550200 |
| H | 3.88539900  | -4.95676700 | -1.98173300 |
| H | 6.00712600  | -3.17419400 | 1.30117400  |
| H | 5.82752300  | -4.93495700 | -0.43718300 |
| C | 0.65109700  | -1.61412000 | -0.03023700 |
| P | -0.00026300 | -3.28705400 | 0.20447300  |
| C | -1.75379400 | -1.16206100 | 0.24780500  |
| C | -3.09573300 | -1.43262100 | 0.62394600  |
| C | -3.58594100 | -2.75746900 | 0.66238800  |
| C | -3.99354300 | -0.39517300 | 0.96194100  |
| C | -4.90160800 | -3.02099600 | 1.01352300  |
| H | -2.91225700 | -3.57521800 | 0.42371200  |
| C | -5.30810200 | -0.66535800 | 1.31074200  |
| H | -3.63690500 | 0.62988500  | 0.90919400  |
| C | -5.77095500 | -1.98034800 | 1.33752700  |
| H | -5.25045000 | -4.04869800 | 1.03869600  |
| H | -5.97682900 | 0.15432500  | 1.55846400  |
| H | -6.79958500 | -2.19267500 | 1.61021900  |
| C | -0.54268600 | -0.82949000 | -0.09044300 |
| C | -0.79222900 | -3.83380900 | -1.34574500 |
| H | -1.42793000 | -4.69663400 | -1.14057700 |
| H | -1.38939400 | -3.03104700 | -1.78082200 |
| H | -0.01241000 | -4.14897700 | -2.04721900 |
| O | 0.75942800  | -4.36722400 | 0.90915600  |

|   |             |            |             |
|---|-------------|------------|-------------|
| C | 3.57719800  | 2.07557300 | -0.10684000 |
| C | 2.37556800  | 2.35769300 | 0.58642100  |
| C | 2.05928700  | 3.63005100 | 1.05294000  |
| C | 2.95818800  | 4.65051800 | 0.76160700  |
| C | 4.13821000  | 4.40434000 | 0.03803100  |
| C | 4.46024300  | 3.12887600 | -0.39464400 |
| C | 3.57803900  | 0.68222700 | -0.37151800 |
| C | 2.40913200  | 0.13427600 | 0.13445200  |
| H | 1.15092900  | 3.82361200 | 1.61834100  |
| H | 2.74380600  | 5.65856200 | 1.10262000  |
| H | 4.81093600  | 5.22935500 | -0.17194700 |
| H | 5.38105000  | 2.94094200 | -0.93835100 |
| H | 4.32155900  | 0.12046100 | -0.92036200 |
| C | 0.67108800  | 1.07963800 | 1.70389400  |
| N | 1.08350600  | 0.75694000 | 2.91764400  |
| C | 0.18458900  | 0.85564900 | 3.90307900  |
| C | -1.09736100 | 1.35061200 | 3.68749400  |
| C | -1.45146000 | 1.60909900 | 2.37260100  |
| N | -0.58692000 | 1.42770100 | 1.35840200  |
| H | 0.51700100  | 0.54605200 | 4.89098100  |
| H | -1.80325900 | 1.49208600 | 4.49671300  |
| H | -2.44856400 | 1.94252600 | 2.09772900  |
| N | 1.64105100  | 1.17533500 | 0.68117900  |
| C | -0.46081500 | 1.96584300 | -2.04507200 |
| C | -1.09847500 | 0.77452300 | -2.50731400 |
| C | -2.47763400 | 0.82304800 | -2.10491700 |
| C | -2.71141000 | 2.06619600 | -1.41805900 |

|                                            |             |             |                             |
|--------------------------------------------|-------------|-------------|-----------------------------|
| C                                          | -1.46099900 | 2.74499700  | -1.34658400                 |
| C                                          | -1.22413000 | 4.05981300  | -0.69303700                 |
| H                                          | -0.18208100 | 4.17600700  | -0.38203600                 |
| H                                          | -1.45114300 | 4.87958400  | -1.38404700                 |
| H                                          | -1.85946600 | 4.19916500  | 0.18704900                  |
| C                                          | 0.94338400  | 2.35507500  | -2.32932800                 |
| H                                          | 1.64491100  | 1.53549500  | -2.13582500                 |
| H                                          | 1.05365600  | 2.62317000  | -3.38731800                 |
| H                                          | 1.26443300  | 3.21574300  | -1.73827400                 |
| C                                          | -0.44277100 | -0.30856900 | -3.28842000                 |
| H                                          | -0.97005800 | -1.26022700 | -3.18339200                 |
| H                                          | -0.43009300 | -0.06318800 | -4.35675600                 |
| H                                          | 0.59461400  | -0.46117700 | -2.97450900                 |
| C                                          | -3.49931100 | -0.20851100 | -2.42689700                 |
| H                                          | -4.34701100 | -0.18325700 | -1.73776400                 |
| H                                          | -3.88966400 | -0.05209300 | -3.43919700                 |
| H                                          | -3.08105300 | -1.21937100 | -2.39527600                 |
| C                                          | -4.02045800 | 2.57871300  | -0.92768500                 |
| H                                          | -4.46608000 | 3.26889400  | -1.65391300                 |
| H                                          | -4.74275300 | 1.77370400  | -0.76740400                 |
| H                                          | -3.92177400 | 3.13543800  | 0.01035600                  |
| Co                                         | -1.23924000 | 0.90223600  | -0.47665700                 |
| Zero-point correction=                     |             |             | 0.648103 (Hartree/Particle) |
| Thermal correction to Energy=              |             |             | 0.690015                    |
| Thermal correction to Enthalpy=            |             |             | 0.690959                    |
| Thermal correction to Gibbs Free Energy=   |             |             | 0.574547                    |
| Sum of electronic and zero-point Energies= |             |             | -2233.507101                |

Sum of electronic and thermal Energies= -2233.465189  
 Sum of electronic and thermal Enthalpies= -2233.464245  
 Sum of electronic and thermal Free Energies= -2233.580657  
 E(RM06L) = -2234.155204 A.U.

**(T)A-TS5**

1 3

Number of imaginary frequencies: 1

|   |             |            |             |
|---|-------------|------------|-------------|
| C | -2.05476500 | 1.11665800 | -0.08323700 |
| C | -3.23136700 | 1.99283900 | -0.17913500 |
| C | -3.28630500 | 3.01466500 | -1.13796400 |
| C | -4.31853100 | 1.82487400 | 0.69300400  |
| C | -4.38819000 | 3.85456500 | -1.21682900 |
| H | -2.46765400 | 3.11598100 | -1.84779100 |
| C | -5.41587500 | 2.67292200 | 0.61979800  |
| H | -4.27776900 | 1.04324900 | 1.44736800  |
| C | -5.45347300 | 3.68864700 | -0.33351700 |
| H | -4.42218500 | 4.63360700 | -1.97199000 |
| H | -6.24252700 | 2.54559800 | 1.31186900  |
| H | -6.31413400 | 4.34779100 | -0.39209900 |
| C | -0.77875100 | 1.62560400 | -0.18202300 |
| P | -0.23717300 | 3.34641500 | 0.01400200  |
| C | 1.61721700  | 1.46703300 | 0.16193700  |
| C | 2.96044000  | 1.76138700 | 0.49133200  |
| C | 3.45597100  | 3.07558900 | 0.34907900  |
| C | 3.84223000  | 0.76508400 | 0.96307200  |
| C | 4.77536100  | 3.36952300 | 0.65886000  |
| H | 2.78612300  | 3.85780800 | 0.00341000  |

|   |             |             |             |
|---|-------------|-------------|-------------|
| C | 5.16123600  | 1.06776900  | 1.26432600  |
| H | 3.47576700  | -0.25407700 | 1.03786900  |
| C | 5.63510900  | 2.37106500  | 1.11525100  |
| H | 5.13603500  | 4.38674300  | 0.54363600  |
| H | 5.82576400  | 0.28149000  | 1.61195400  |
| H | 6.66733300  | 2.60682600  | 1.35286500  |
| C | 0.48856100  | 0.94159400  | -0.19377100 |
| C | 0.37075900  | 3.91435100  | -1.61238900 |
| H | 0.95006200  | 4.82995900  | -1.48061000 |
| H | 0.99599500  | 3.15159500  | -2.08107900 |
| H | -0.48047300 | 4.14549000  | -2.26002600 |
| O | -1.07095700 | 4.35415300  | 0.74797500  |
| C | -3.18614500 | -2.39014700 | -0.07144600 |
| C | -1.94825700 | -2.47969100 | 0.60246000  |
| C | -1.45323400 | -3.67373900 | 1.11087500  |
| C | -2.20628000 | -4.82035600 | 0.87711300  |
| C | -3.41724400 | -4.76579100 | 0.16768300  |
| C | -3.91846700 | -3.56304400 | -0.30571000 |
| C | -3.39326700 | -1.01524400 | -0.37978900 |
| C | -2.31676100 | -0.29281800 | 0.08235600  |
| H | -0.51379400 | -3.71723500 | 1.65513400  |
| H | -1.84980400 | -5.77475000 | 1.25207000  |
| H | -3.97401200 | -5.68219100 | 0.00086700  |
| H | -4.86397100 | -3.52475200 | -0.83787800 |
| H | -4.21849500 | -0.58881800 | -0.93409500 |
| C | -0.57438800 | -0.89486800 | 1.78013800  |
| N | -1.13933900 | -0.41617600 | 2.87088700  |

|   |             |             |             |
|---|-------------|-------------|-------------|
| C | -0.33595500 | -0.27900400 | 3.93395800  |
| C | 0.99596600  | -0.68167300 | 3.91609500  |
| C | 1.50356200  | -1.12800400 | 2.70515000  |
| N | 0.73034500  | -1.19752300 | 1.60911000  |
| H | -0.78727000 | 0.15035000  | 4.82490400  |
| H | 1.62392600  | -0.61710500 | 4.79616700  |
| H | 2.54553900  | -1.41035200 | 2.58434900  |
| N | -1.37885100 | -1.19123800 | 0.65016200  |
| C | 0.62425500  | -2.22791100 | -2.03876000 |
| C | 1.11590700  | -0.95688900 | -2.46389700 |
| C | 2.48888200  | -0.81826000 | -1.99550200 |
| C | 2.79101300  | -1.94644200 | -1.20438900 |
| C | 1.62031000  | -2.80756400 | -1.20376500 |
| C | 1.56983600  | -4.13272000 | -0.52955900 |
| H | 0.55777700  | -4.54169100 | -0.49782800 |
| H | 2.20318900  | -4.85510700 | -1.05797800 |
| H | 1.94625400  | -4.08154700 | 0.49844100  |
| C | -0.70500900 | -2.79445200 | -2.39328300 |
| H | -1.50269700 | -2.04864900 | -2.30885600 |
| H | -0.70610900 | -3.14456200 | -3.43198400 |
| H | -0.97761300 | -3.64273600 | -1.76088400 |
| C | 0.40807600  | -0.00819300 | -3.36591500 |
| H | 0.75364300  | 1.01932400  | -3.22255600 |
| H | 0.57876900  | -0.26448800 | -4.41846000 |
| H | -0.67323800 | -0.02260200 | -3.19848300 |
| C | 3.39529500  | 0.29535600  | -2.38189200 |
| H | 4.27888100  | 0.35690200  | -1.74218900 |

|                                              |              |             |                             |
|----------------------------------------------|--------------|-------------|-----------------------------|
| H                                            | 3.73956500   | 0.15846700  | -3.41377800                 |
| H                                            | 2.89130100   | 1.26670500  | -2.34170800                 |
| C                                            | 4.09592000   | -2.29792500 | -0.57643500                 |
| H                                            | 4.58971900   | -3.10636700 | -1.12821400                 |
| H                                            | 4.78344000   | -1.44873400 | -0.56072600                 |
| H                                            | 3.97926900   | -2.65476600 | 0.45384800                  |
| Co                                           | 1.08895200   | -0.92522200 | -0.38704300                 |
| Zero-point correction=                       |              |             | 0.647873 (Hartree/Particle) |
| Thermal correction to Energy=                |              |             | 0.689919                    |
| Thermal correction to Enthalpy=              |              |             | 0.690863                    |
| Thermal correction to Gibbs Free Energy=     |              |             | 0.573037                    |
| Sum of electronic and zero-point Energies=   |              |             | -2233.517399                |
| Sum of electronic and thermal Energies=      |              |             | -2233.475352                |
| Sum of electronic and thermal Enthalpies=    |              |             | -2233.474408                |
| Sum of electronic and thermal Free Energies= |              |             | -2233.592235                |
| E(RM06L) =                                   | -2234.165272 | A.U.        |                             |

**(S)A-TS6**

1 1

Number of imaginary frequencies: 1

|   |             |             |            |
|---|-------------|-------------|------------|
| C | -1.57534700 | -0.74463800 | 0.89768900 |
| C | -2.86087700 | -1.27737700 | 1.36183000 |
| C | -3.18393100 | -2.64178900 | 1.27285300 |
| C | -3.81638300 | -0.39595900 | 1.89649300 |
| C | -4.41765300 | -3.10025900 | 1.71624800 |
| H | -2.50014000 | -3.33755700 | 0.79283100 |
| C | -5.04909300 | -0.86060700 | 2.33808200 |
| H | -3.58651000 | 0.66517900  | 1.97374800 |

|   |             |             |             |
|---|-------------|-------------|-------------|
| C | -5.35366600 | -2.21659600 | 2.25233000  |
| H | -4.65640100 | -4.15602900 | 1.62778100  |
| H | -5.77022700 | -0.16286700 | 2.75289700  |
| H | -6.31641100 | -2.58260400 | 2.59588000  |
| C | -0.42148700 | -1.43825100 | 0.68813600  |
| P | 0.07589900  | -3.16732700 | 0.36507900  |
| C | 1.37641100  | -2.13956700 | -0.39291600 |
| C | 2.45280200  | -2.42820500 | -1.28852500 |
| C | 3.20039700  | -1.38684800 | -1.87725200 |
| C | 2.77996500  | -3.76120800 | -1.60452100 |
| C | 4.24688600  | -1.67278700 | -2.73813800 |
| H | 2.94258100  | -0.35602100 | -1.64024400 |
| C | 3.82948000  | -4.04166300 | -2.46796200 |
| H | 2.18805600  | -4.56972900 | -1.18130200 |
| C | 4.56655300  | -3.00132500 | -3.03299600 |
| H | 4.81780700  | -0.86415000 | -3.18627400 |
| H | 4.07260400  | -5.07188500 | -2.70761500 |
| H | 5.38705500  | -3.22348500 | -3.70838500 |
| C | 0.79143900  | -0.94388700 | 0.02842200  |
| C | 0.66971300  | -3.97218100 | 1.87894300  |
| H | 1.21978500  | -4.87622500 | 1.60724000  |
| H | 1.30726100  | -3.33680700 | 2.49668200  |
| H | -0.20214300 | -4.27320000 | 2.46570900  |
| O | -0.76348000 | -4.07875200 | -0.47222200 |
| C | -0.89596600 | 2.84377600  | 0.18540800  |
| C | -1.97511100 | 2.54608800  | -0.66694000 |
| C | -2.52115400 | 3.47483700  | -1.54647400 |

|   |             |             |             |
|---|-------------|-------------|-------------|
| C | -1.96062400 | 4.74879500  | -1.54691900 |
| C | -0.89044800 | 5.07367700  | -0.70452700 |
| C | -0.34972500 | 4.12690000  | 0.15756300  |
| C | -0.54623300 | 1.62054000  | 0.90116700  |
| C | -1.49116500 | 0.64762000  | 0.47078300  |
| H | -3.36146200 | 3.22327100  | -2.18074900 |
| H | -2.36797600 | 5.50434900  | -2.21113400 |
| H | -0.47732300 | 6.07718800  | -0.72830600 |
| H | 0.50018200  | 4.37763400  | 0.78574800  |
| H | -0.34321700 | 1.62204400  | 1.96709700  |
| C | -3.25701100 | 0.45551400  | -1.24238700 |
| N | -4.37923900 | 1.10068300  | -1.54165200 |
| C | -5.27616500 | 0.37555300  | -2.22043200 |
| C | -5.05665400 | -0.95249200 | -2.56588500 |
| C | -3.82438400 | -1.49237300 | -2.21081100 |
| N | -2.90214700 | -0.78480500 | -1.55524700 |
| H | -6.20165600 | 0.88427200  | -2.48168400 |
| H | -5.80215000 | -1.53288300 | -3.09624400 |
| H | -3.55102200 | -2.51708400 | -2.45569600 |
| N | -2.31365800 | 1.18933300  | -0.46511400 |
| C | 3.10338500  | -0.02590000 | 1.69344900  |
| C | 3.58076700  | 1.09191500  | 0.95526700  |
| C | 2.90865700  | 2.27454800  | 1.44913900  |
| C | 2.02420700  | 1.87407300  | 2.47890000  |
| C | 2.06233400  | 0.43675800  | 2.57445600  |
| C | 1.30622800  | -0.38433000 | 3.55758700  |
| H | 0.29651400  | 0.00336400  | 3.72455500  |

|    |            |             |             |
|----|------------|-------------|-------------|
| H  | 1.19717800 | -1.41579500 | 3.21578500  |
| H  | 1.81067400 | -0.41018300 | 4.53064400  |
| C  | 3.66961900 | -1.39671800 | 1.65116300  |
| H  | 4.09451300 | -1.64487600 | 0.67622000  |
| H  | 4.47808300 | -1.46678500 | 2.38857400  |
| H  | 2.93281000 | -2.16124600 | 1.90349700  |
| C  | 4.64933400 | 1.11874300  | -0.07555100 |
| H  | 4.31386100 | 1.65341700  | -0.97068300 |
| H  | 5.52987600 | 1.64868600  | 0.30553500  |
| H  | 4.96710200 | 0.11677700  | -0.36996100 |
| C  | 3.17721700 | 3.65232500  | 0.96494500  |
| H  | 2.62899600 | 4.40286600  | 1.53851400  |
| H  | 4.24346000 | 3.88663300  | 1.05316100  |
| H  | 2.90717000 | 3.75370700  | -0.09155300 |
| C  | 1.22502300 | 2.77894500  | 3.34748100  |
| H  | 1.86265300 | 3.15872500  | 4.15373600  |
| H  | 0.83261000 | 3.64694100  | 2.81197100  |
| H  | 0.38626400 | 2.26805100  | 3.82689000  |
| Co | 1.53170500 | 0.91678700  | 0.63998300  |
| O  | 0.21882600 | 0.55956300  | -2.05111400 |
| O  | 1.71378200 | 1.88729800  | -1.05736400 |
| C  | 0.94513700 | 1.59305200  | -2.03390800 |
| C  | 0.88661000 | 2.54871200  | -3.18225900 |
| H  | 1.83515600 | 3.07191700  | -3.30377900 |
| H  | 0.60414100 | 2.03793400  | -4.10200400 |
| H  | 0.11917200 | 3.29800000  | -2.95690500 |
| H  | 0.60432400 | -0.11070700 | -0.91777100 |

|                                              |                            |
|----------------------------------------------|----------------------------|
| Zero-point correction=                       | 0.710064(Hartree/Particle) |
| Thermal correction to Energy=                | 0.756529                   |
| Thermal correction to Enthalpy=              | 0.757473                   |
| Thermal correction to Gibbs Free Energy=     | 0.632584                   |
| Sum of electronic and zero-point Energies=   | -2462.591500               |
| Sum of electronic and thermal Energies=      | -2462.545035               |
| Sum of electronic and thermal Enthalpies=    | -2462.544091               |
| Sum of electronic and thermal Free Energies= | -2462.668980               |

E(RM06L) = -2463.301564 A.U.

**(T)A-TS6**

1 3

Number of imaginary frequencies: 1

|   |             |             |             |
|---|-------------|-------------|-------------|
| C | -1.60359200 | -0.89512600 | 0.87101800  |
| C | -2.76264200 | -1.60134400 | 1.42835500  |
| C | -2.94839400 | -2.98641800 | 1.27735700  |
| C | -3.72421100 | -0.86818300 | 2.14500100  |
| C | -4.05023700 | -3.61118300 | 1.84549300  |
| H | -2.26642800 | -3.56677000 | 0.66085000  |
| C | -4.82151700 | -1.50042800 | 2.71616200  |
| H | -3.59579800 | 0.20487200  | 2.26760600  |
| C | -4.98666300 | -2.87545700 | 2.57177100  |
| H | -4.18777300 | -4.67957800 | 1.70766400  |
| H | -5.54804100 | -0.91827000 | 3.27481300  |
| H | -5.84549300 | -3.37111000 | 3.01425700  |
| C | -0.38818300 | -1.44822100 | 0.59496800  |
| P | 0.28032000  | -3.11829600 | 0.27267700  |
| C | 1.45891400  | -1.97036800 | -0.52698100 |

|   |             |             |             |
|---|-------------|-------------|-------------|
| C | 2.57992700  | -2.12783300 | -1.39287600 |
| C | 3.18700300  | -1.01305000 | -2.01390400 |
| C | 3.11794200  | -3.41071500 | -1.62708500 |
| C | 4.30577500  | -1.17745000 | -2.81341500 |
| H | 2.76266300  | -0.01911200 | -1.86962500 |
| C | 4.23832400  | -3.56876100 | -2.42809000 |
| H | 2.63688900  | -4.27696800 | -1.17883100 |
| C | 4.83714100  | -2.45441100 | -3.01780300 |
| H | 4.76389400  | -0.31596000 | -3.29071800 |
| H | 4.64576000  | -4.55944900 | -2.60152300 |
| H | 5.71100600  | -2.58047800 | -3.64960800 |
| C | 0.75726300  | -0.83735600 | -0.09762000 |
| C | 1.01803600  | -3.80464500 | 1.78040500  |
| H | 1.66997300  | -4.64115400 | 1.51824600  |
| H | 1.58172400  | -3.06295300 | 2.34909100  |
| H | 0.20935700  | -4.18953700 | 2.40739500  |
| O | -0.44921100 | -4.13270600 | -0.54789200 |
| C | -1.53299700 | 2.79498400  | 0.52023700  |
| C | -2.54870500 | 2.42673600  | -0.39688600 |
| C | -3.21330900 | 3.37628900  | -1.17347600 |
| C | -2.84642800 | 4.70727900  | -1.01115700 |
| C | -1.84987800 | 5.09333600  | -0.10188200 |
| C | -1.19122100 | 4.14572900  | 0.66610400  |
| C | -1.04333700 | 1.58646900  | 1.10764900  |
| C | -1.74387600 | 0.53353600  | 0.56451600  |
| H | -3.99819300 | 3.08517700  | -1.85781600 |
| H | -3.35616600 | 5.46628800  | -1.59649800 |

|   |             |             |             |
|---|-------------|-------------|-------------|
| H | -1.59995700 | 6.14432600  | 0.00492900  |
| H | -0.42238700 | 4.44868200  | 1.37256700  |
| H | -0.37737600 | 1.48456200  | 1.95182700  |
| C | -3.39788400 | 0.23506600  | -1.26555700 |
| N | -4.46409700 | 0.80047200  | -1.83106200 |
| C | -5.13474800 | 0.02076600  | -2.68422400 |
| C | -4.77085400 | -1.29327200 | -2.95211300 |
| C | -3.63729300 | -1.76121800 | -2.29635400 |
| N | -2.93301500 | -0.99786400 | -1.46160500 |
| H | -6.00307400 | 0.47386900  | -3.15899500 |
| H | -5.33608000 | -1.91519100 | -3.63561800 |
| H | -3.26320600 | -2.77391900 | -2.44071400 |
| N | -2.67327600 | 1.02902700  | -0.35150500 |
| C | 3.44623300  | 0.08687000  | 1.43473200  |
| C | 3.85431700  | 1.27383800  | 0.79026700  |
| C | 3.04753500  | 2.34777800  | 1.31917500  |
| C | 2.20897700  | 1.83801500  | 2.36092800  |
| C | 2.39259200  | 0.43663700  | 2.39845000  |
| C | 1.73326500  | -0.50985500 | 3.33886400  |
| H | 0.80310600  | -0.92422600 | 2.92597500  |
| H | 2.38925100  | -1.35143300 | 3.57936700  |
| H | 1.47478700  | -0.01730500 | 4.27939700  |
| C | 4.09209400  | -1.24775800 | 1.34038400  |
| H | 4.62248900  | -1.38697100 | 0.39516100  |
| H | 4.82606000  | -1.35867700 | 2.14780500  |
| H | 3.37536700  | -2.06723300 | 1.44241600  |
| C | 4.90299800  | 1.43452900  | -0.25341700 |

|                                            |             |            |                             |
|--------------------------------------------|-------------|------------|-----------------------------|
| H                                          | 4.52632500  | 1.98412600 | -1.12338800                 |
| H                                          | 5.75770900  | 1.99977800 | 0.13387400                  |
| H                                          | 5.27438900  | 0.46958300 | -0.60475800                 |
| C                                          | 3.11457800  | 3.76526300 | 0.89148100                  |
| H                                          | 2.13238300  | 4.24420100 | 0.92959600                  |
| H                                          | 3.78054800  | 4.32859800 | 1.55650900                  |
| H                                          | 3.49656600  | 3.86537200 | -0.12573400                 |
| C                                          | 1.36169100  | 2.66346800 | 3.26382500                  |
| H                                          | 1.98401900  | 3.15967500 | 4.01726000                  |
| H                                          | 0.83091400  | 3.45377200 | 2.72578200                  |
| H                                          | 0.61759800  | 2.06953900 | 3.79940500                  |
| Co                                         | 1.75519900  | 0.89708300 | 0.39906000                  |
| O                                          | -0.08520900 | 0.80779300 | -1.98664700                 |
| O                                          | 1.36912800  | 2.19490600 | -0.98521700                 |
| C                                          | 0.46137900  | 1.93642800 | -1.85807700                 |
| C                                          | 0.05414100  | 3.05814900 | -2.75705100                 |
| H                                          | 0.93490400  | 3.49472700 | -3.23202500                 |
| H                                          | -0.65358900 | 2.71775000 | -3.51070200                 |
| H                                          | -0.40796900 | 3.84265200 | -2.14868200                 |
| H                                          | 0.42878600  | 0.02185800 | -0.98913300                 |
| Zero-point correction=                     |             |            | 0.708193 (Hartree/Particle) |
| Thermal correction to Energy=              |             |            | 0.755375                    |
| Thermal correction to Enthalpy=            |             |            | 0.756320                    |
| Thermal correction to Gibbs Free Energy=   |             |            | 0.628078                    |
| Sum of electronic and zero-point Energies= |             |            | -2462.583789                |
| Sum of electronic and thermal Energies=    |             |            | -2462.536607                |
| Sum of electronic and thermal Enthalpies=  |             |            | -2462.535662                |

Sum of electronic and thermal Free Energies= -2462.663904

E(RM06L) = -2463.291982 A.U.

### B-1-Co

1 1

Number of imaginary frequencies: 0

|   |             |             |             |
|---|-------------|-------------|-------------|
| C | -0.35491500 | -1.13967800 | -1.58476900 |
| C | -1.57910900 | -1.69183500 | -1.06878700 |
| C | -2.58309800 | -0.68351400 | -1.11020800 |
| C | -1.98259800 | 0.51351200  | -1.67360300 |
| C | -0.62406000 | 0.21363400  | -1.99188100 |
| O | -1.08990900 | -1.00260900 | 1.79253400  |
| O | -2.25931000 | 0.77475600  | 1.37089200  |
| C | -1.94260000 | -0.14540600 | 2.19884800  |
| C | -3.98577100 | -0.80037100 | -0.63956000 |
| H | -4.65043300 | -1.03116300 | -1.47942100 |
| H | -4.10231800 | -1.60055200 | 0.09554200  |
| H | -4.33628000 | 0.12933500  | -0.18615200 |
| C | -1.70313600 | -3.05586800 | -0.50131300 |
| H | -2.56513000 | -3.15310500 | 0.16050200  |
| H | -1.81768100 | -3.78735200 | -1.30928300 |
| H | -0.80808800 | -3.33001600 | 0.06378100  |
| C | 0.89054600  | -1.91250400 | -1.82492500 |
| H | 1.24045300  | -2.42578500 | -0.92356700 |
| H | 0.70497700  | -2.68726300 | -2.57767100 |
| H | 1.69646200  | -1.28010800 | -2.20051400 |
| C | 0.36991800  | 1.14468000  | -2.58176800 |
| H | 1.39153300  | 0.94137500  | -2.24261100 |

|    |             |             |             |
|----|-------------|-------------|-------------|
| H  | 0.36593700  | 1.03898200  | -3.67245400 |
| H  | 0.13535200  | 2.18903700  | -2.35974800 |
| C  | -2.68447800 | 1.80884100  | -1.85822700 |
| H  | -1.98659400 | 2.63298900  | -2.02227800 |
| H  | -3.34772400 | 1.76541700  | -2.72938400 |
| H  | -3.30809600 | 2.05261300  | -0.99268100 |
| Co | -1.03215900 | -0.04340900 | 0.02160300  |
| C  | -2.56206900 | -0.22429800 | 3.54650700  |
| H  | -2.66765000 | 0.77176500  | 3.97841800  |
| H  | -3.56898400 | -0.64170700 | 3.45189500  |
| H  | -1.98333300 | -0.86820700 | 4.20747600  |
| C  | 1.87473900  | -1.03114800 | 1.48381300  |
| C  | 2.47239300  | -2.24836400 | 1.59315800  |
| C  | 3.54853300  | -2.56458100 | 0.72383500  |
| C  | 3.95278900  | -1.68524500 | -0.23811600 |
| C  | 3.31012400  | -0.41622100 | -0.43729800 |
| C  | 1.72216400  | 1.17673000  | 0.51852300  |
| C  | -0.12239700 | 2.56988400  | 0.60274900  |
| C  | 0.66977700  | 3.70166000  | 0.62458900  |
| C  | 2.05402400  | 3.55013300  | 0.57743900  |
| C  | 2.58436800  | 2.27255600  | 0.53427200  |
| H  | 1.07745000  | -0.70098000 | 2.13681800  |
| H  | 2.14515500  | -2.93233700 | 2.36574800  |
| H  | 4.05639700  | -3.51946800 | 0.82707100  |
| H  | 4.76582700  | -1.90909400 | -0.91889500 |
| H  | -1.20405300 | 2.63164800  | 0.64309700  |
| H  | 0.20544900  | 4.67960600  | 0.67751600  |

|                                              |              |             |                            |
|----------------------------------------------|--------------|-------------|----------------------------|
| H                                            | 2.71109600   | 4.41337600  | 0.59135100                 |
| H                                            | 3.65252300   | 2.10016000  | 0.51029400                 |
| N                                            | 2.27367400   | -0.13061300 | 0.52278600                 |
| N                                            | 0.38300800   | 1.31469300  | 0.52605800                 |
| O                                            | 3.53901800   | 0.38894600  | -1.33588800                |
| Zero-point correction=                       |              |             | 0.441415(Hartree/Particle) |
| Thermal correction to Energy=                |              |             | 0.469865                   |
| Thermal correction to Enthalpy=              |              |             | 0.470810                   |
| Thermal correction to Gibbs Free Energy=     |              |             | 0.384917                   |
| Sum of electronic and zero-point Energies=   |              |             | -1334.443828               |
| Sum of electronic and thermal Energies=      |              |             | -1334.415377               |
| Sum of electronic and thermal Enthalpies=    |              |             | -1334.414433               |
| Sum of electronic and thermal Free Energies= |              |             | -1334.500326               |
| E(RM06L) =                                   | -1334.885243 | A.U.        |                            |

### B-2a-Co

1 1

Number of imaginary frequencies: 0

|   |             |             |             |
|---|-------------|-------------|-------------|
| C | -0.80946800 | -0.58869500 | -2.05402400 |
| C | -1.55210300 | -1.56454200 | -1.29066800 |
| C | -2.56053700 | -0.86633800 | -0.57922100 |
| C | -2.52322400 | 0.53184000  | -0.96561300 |
| C | -1.48211700 | 0.68243200  | -1.91068300 |
| C | -3.52148300 | -1.44943200 | 0.39120400  |
| H | -4.46137600 | -1.70621000 | -0.11065800 |
| H | -3.13686000 | -2.36477900 | 0.84815100  |
| H | -3.76246100 | -0.74235600 | 1.18884000  |
| C | -1.36818000 | -3.03678900 | -1.34568900 |

|    |             |             |             |
|----|-------------|-------------|-------------|
| H  | -1.68043700 | -3.53382300 | -0.42397300 |
| H  | -1.98982300 | -3.44402100 | -2.15154800 |
| H  | -0.33560200 | -3.32034500 | -1.55606100 |
| C  | 0.33134800  | -0.87633500 | -2.96365700 |
| H  | 0.92816800  | -1.71930300 | -2.60418800 |
| H  | -0.02297500 | -1.12937400 | -3.96944200 |
| H  | 0.99950500  | -0.01658500 | -3.06380900 |
| C  | -1.08230600 | 1.92510300  | -2.61798300 |
| H  | 0.00416500  | 2.02624900  | -2.69392900 |
| H  | -1.47063000 | 1.90176100  | -3.64227800 |
| H  | -1.47716100 | 2.82588300  | -2.14341300 |
| C  | -3.43934300 | 1.57788900  | -0.43823000 |
| H  | -3.15308200 | 2.57881900  | -0.77033700 |
| H  | -4.46808200 | 1.40885900  | -0.77373700 |
| H  | -3.45275000 | 1.57480200  | 0.65691500  |
| N  | 2.06936700  | -0.34394300 | 0.01324200  |
| C  | 1.86961900  | 1.04189300  | -0.04140400 |
| N  | 0.56180700  | 1.38254700  | 0.04188500  |
| C  | 0.20324400  | 2.67366300  | 0.15347900  |
| C  | 1.12916800  | 3.69875000  | 0.13812700  |
| C  | 2.47342700  | 3.35838400  | -0.00739500 |
| H  | -0.86439200 | 2.85288900  | 0.25178200  |
| H  | 0.80461800  | 4.72836900  | 0.23034700  |
| H  | 3.23384700  | 4.13212100  | -0.04042600 |
| Co | -0.69922500 | -0.07895200 | -0.09940100 |
| C  | 3.39863800  | -0.92421200 | -0.08796200 |
| C  | 3.45495600  | -2.31393900 | 0.28190800  |

|                                              |              |             |                             |
|----------------------------------------------|--------------|-------------|-----------------------------|
| H                                            | 4.44425100   | -2.75530500 | 0.26562800                  |
| C                                            | 2.34597700   | -3.02062600 | 0.62547200                  |
| C                                            | 1.05890500   | -2.41500600 | 0.58815100                  |
| C                                            | 0.90402800   | -1.09489100 | 0.25727900                  |
| O                                            | 4.35341300   | -0.25270900 | -0.44726700                 |
| H                                            | 2.43491600   | -4.06581000 | 0.91060300                  |
| H                                            | 0.17683600   | -3.01023300 | 0.80145400                  |
| C                                            | 2.86001000   | 2.02906100  | -0.09632500                 |
| H                                            | 3.89429500   | 1.73747300  | -0.19838500                 |
| O                                            | 0.08791800   | -0.65182000 | 3.12142500                  |
| O                                            | -1.40595200  | 0.33976100  | 1.75502500                  |
| C                                            | -0.97556500  | 0.08265000  | 2.89053500                  |
| H                                            | 0.44918200   | -0.98378000 | 2.26596200                  |
| C                                            | -1.63917100  | 0.59259300  | 4.11777100                  |
| H                                            | -2.53263700  | 1.15965300  | 3.86611800                  |
| H                                            | -1.89477800  | -0.24110500 | 4.77539500                  |
| H                                            | -0.94385500  | 1.22505100  | 4.67504000                  |
| Zero-point correction=                       |              |             | 0.440774 (Hartree/Particle) |
| Thermal correction to Energy=                |              |             | 0.469588                    |
| Thermal correction to Enthalpy=              |              |             | 0.470533                    |
| Thermal correction to Gibbs Free Energy=     |              |             | 0.381757                    |
| Sum of electronic and zero-point Energies=   |              |             | -1334.428917                |
| Sum of electronic and thermal Energies=      |              |             | -1334.400102                |
| Sum of electronic and thermal Enthalpies=    |              |             | -1334.399158                |
| Sum of electronic and thermal Free Energies= |              |             | -1334.487934                |
| E(RM06L) =                                   | -1334.869691 | A.U.        |                             |

### B-3a-Co

Number of imaginary frequencies: 0

|   |            |             |             |
|---|------------|-------------|-------------|
| C | 1.83958800 | -0.17102300 | 1.40631300  |
| C | 2.00554900 | -1.37623900 | 0.62809200  |
| C | 2.42614100 | -0.98045400 | -0.66654300 |
| C | 2.64080900 | 0.46495400  | -0.66099400 |
| C | 2.32858200 | 0.94647200  | 0.62417500  |
| C | 2.65307900 | -1.85667000 | -1.84338900 |
| H | 3.72669700 | -2.00991800 | -2.00459600 |
| H | 2.19642800 | -2.84057600 | -1.71925700 |
| H | 2.25630300 | -1.41492600 | -2.76204200 |
| C | 1.83400100 | -2.75550400 | 1.15372300  |
| H | 1.84063000 | -3.50810100 | 0.36317800  |
| H | 2.67024500 | -2.98969000 | 1.82188200  |
| H | 0.91430400 | -2.87320100 | 1.73151700  |
| C | 1.36822100 | -0.10101700 | 2.81015000  |
| H | 0.68733200 | -0.92044000 | 3.05058600  |
| H | 2.21784400 | -0.16943800 | 3.50146600  |
| H | 0.85812800 | 0.84214600  | 3.02198400  |
| C | 2.44754400 | 2.33483900  | 1.14046100  |
| H | 1.54864800 | 2.66106200  | 1.67229400  |
| H | 3.27361100 | 2.38854800  | 1.85808200  |
| H | 2.66291000 | 3.05979200  | 0.35262400  |
| C | 3.09519700 | 1.24874300  | -1.83853800 |
| H | 2.97314100 | 2.32423400  | -1.69248500 |
| H | 4.15730100 | 1.06614500  | -2.03797100 |
| H | 2.55404800 | 0.96884800  | -2.74760200 |

|                                            |             |             |                             |
|--------------------------------------------|-------------|-------------|-----------------------------|
| N                                          | -2.07305000 | -0.42889600 | -0.01684300                 |
| C                                          | -1.93002600 | 0.96115400  | -0.05773800                 |
| N                                          | -0.63936500 | 1.34982600  | -0.25106700                 |
| C                                          | -0.36583300 | 2.65833800  | -0.44518600                 |
| C                                          | -1.33708700 | 3.63572600  | -0.41462800                 |
| C                                          | -2.65063300 | 3.24251600  | -0.15636900                 |
| H                                          | 0.67510000  | 2.89349700  | -0.63711100                 |
| H                                          | -1.07110900 | 4.67208300  | -0.58436700                 |
| H                                          | -3.44469500 | 3.98053300  | -0.10452800                 |
| Co                                         | 0.67328500  | -0.05367300 | -0.19921200                 |
| C                                          | -3.37344100 | -1.06217100 | 0.06232100                  |
| C                                          | -3.35725500 | -2.47852200 | -0.21969100                 |
| H                                          | -4.32947400 | -2.95699400 | -0.21138900                 |
| C                                          | -2.20778400 | -3.15885700 | -0.47083200                 |
| C                                          | -0.95815400 | -2.48859600 | -0.42018500                 |
| C                                          | -0.87339100 | -1.13784000 | -0.19136400                 |
| O                                          | -4.38209100 | -0.43029600 | 0.33205600                  |
| H                                          | -2.23884900 | -4.22282100 | -0.68894700                 |
| H                                          | -0.04606300 | -3.05192600 | -0.57662000                 |
| C                                          | -2.95994800 | 1.90354200  | 0.02325500                  |
| H                                          | -3.96847800 | 1.56985400  | 0.21272800                  |
| Zero-point correction=                     |             |             | 0.376160 (Hartree/Particle) |
| Thermal correction to Energy=              |             |             | 0.399685                    |
| Thermal correction to Enthalpy=            |             |             | 0.400629                    |
| Thermal correction to Gibbs Free Energy=   |             |             | 0.323901                    |
| Sum of electronic and zero-point Energies= |             |             | -1105.378655                |
| Sum of electronic and thermal Energies=    |             |             | -1105.355130                |

Sum of electronic and thermal Enthalpies= -1105.354186

Sum of electronic and thermal Free Energies= -1105.430914

E(RM06L) = -1105.754815 A.U.

#### B-4-Co

1 1

Number of imaginary frequencies: 0

|   |             |             |             |
|---|-------------|-------------|-------------|
| C | 3.87901900  | -1.10161600 | -0.71703100 |
| C | 5.15663300  | -0.50622000 | -0.57595800 |
| C | 5.85930000  | -0.61876000 | 0.63795900  |
| C | 5.72815900  | 0.20846400  | -1.64441400 |
| C | 7.10524600  | -0.02324600 | 0.77498500  |
| H | 5.42109900  | -1.18350300 | 1.45641600  |
| C | 6.97545200  | 0.79804300  | -1.49502200 |
| H | 5.18864400  | 0.28239000  | -2.58416500 |
| C | 7.66408900  | 0.68495700  | -0.28798300 |
| H | 7.64626700  | -0.11662000 | 1.71124600  |
| H | 7.41577400  | 1.34365900  | -2.32359400 |
| H | 8.64099200  | 1.14521200  | -0.17721600 |
| C | 2.74577000  | -1.55409700 | -0.80580600 |
| P | 1.25964600  | -2.44928500 | -1.05011300 |
| C | -1.33990100 | -1.55604600 | -0.57908600 |
| C | -2.65921300 | -1.90668800 | -0.95054100 |
| C | -3.28517700 | -1.24096400 | -2.02243400 |
| C | -3.34671000 | -2.92713700 | -0.26805500 |
| C | -4.57236700 | -1.59046000 | -2.39796900 |
| H | -2.75136100 | -0.44568500 | -2.53704800 |
| C | -4.63791500 | -3.26428500 | -0.65045700 |

|   |             |             |             |
|---|-------------|-------------|-------------|
| H | -2.85300900 | -3.45375300 | 0.54295900  |
| C | -5.25239000 | -2.59586000 | -1.70874300 |
| H | -5.05186500 | -1.07483500 | -3.22388500 |
| H | -5.16479500 | -4.05593600 | -0.12742500 |
| H | -6.26258900 | -2.86370100 | -2.00272200 |
| C | -0.09833500 | -1.43270700 | -0.42635000 |
| C | 1.00028800  | -2.37512900 | -2.83652800 |
| H | 0.04075500  | -2.83994100 | -3.07485600 |
| H | 1.00130800  | -1.34206300 | -3.19369200 |
| H | 1.79610700  | -2.93151600 | -3.33568200 |
| O | 1.24096500  | -3.80704100 | -0.43200500 |
| C | -1.21854800 | 0.55881200  | 2.80069900  |
| C | -0.83278500 | -0.80377500 | 2.64276800  |
| C | 0.58178900  | -0.83101400 | 2.32984800  |
| C | 1.02571300  | 0.50160000  | 2.17852300  |
| C | -0.10694900 | 1.37219000  | 2.39963800  |
| C | -0.08444300 | 2.85837200  | 2.36746700  |
| H | -1.06732200 | 3.27233900  | 2.12682700  |
| H | 0.21069200  | 3.26508400  | 3.34158000  |
| H | 0.62874500  | 3.23725000  | 1.62966000  |
| C | -2.47842300 | 1.06857000  | 3.39558300  |
| H | -3.28503400 | 0.33498400  | 3.36629900  |
| H | -2.28510700 | 1.29899600  | 4.45045100  |
| H | -2.83278400 | 1.98483200  | 2.91935200  |
| C | -1.66229600 | -2.00602800 | 2.91696000  |
| H | -1.33849500 | -2.85392800 | 2.30648500  |
| H | -1.57684200 | -2.31328600 | 3.96582900  |

|    |             |             |             |
|----|-------------|-------------|-------------|
| H  | -2.72323800 | -1.82751300 | 2.71772700  |
| C  | 1.41558300  | -2.05754300 | 2.30510100  |
| H  | 2.37888000  | -1.89350100 | 1.81691300  |
| H  | 1.61832700  | -2.36930000 | 3.33685800  |
| H  | 0.93149300  | -2.89850500 | 1.80297500  |
| C  | 2.42498200  | 0.94985500  | 1.95679900  |
| H  | 2.92590000  | 1.08489500  | 2.92275200  |
| H  | 3.00520200  | 0.22007000  | 1.38716700  |
| H  | 2.47724200  | 1.91018500  | 1.43753800  |
| Co | -0.58593700 | 0.16620300  | 0.81608400  |
| C  | -2.29781800 | 0.91433500  | 0.27259300  |
| C  | -3.54620100 | 0.50379900  | 0.64408800  |
| C  | -4.70132900 | 1.19397000  | 0.21024200  |
| C  | -4.59896600 | 2.30524800  | -0.57045300 |
| C  | -3.33566200 | 2.82499800  | -1.00262100 |
| C  | -0.89068700 | 2.30037700  | -1.02256800 |
| C  | 1.30126200  | 1.49638300  | -0.98788000 |
| C  | 1.73581900  | 2.47675500  | -1.85974900 |
| C  | 0.80546400  | 3.41382600  | -2.30160600 |
| C  | -0.51686300 | 3.33188800  | -1.89315900 |
| H  | -3.64627100 | -0.38678500 | 1.25565400  |
| H  | -5.68174000 | 0.82915700  | 0.50820200  |
| H  | -5.46426000 | 2.86323600  | -0.90704000 |
| H  | 1.96844600  | 0.72959900  | -0.60991200 |
| H  | 2.77394700  | 2.49968400  | -2.17189000 |
| H  | 1.10144200  | 4.21135700  | -2.97589300 |
| H  | -1.26540100 | 4.03297600  | -2.22780600 |

|                                              |              |            |                            |
|----------------------------------------------|--------------|------------|----------------------------|
| N                                            | -2.18505900  | 2.03351900 | -0.55889900                |
| N                                            | 0.02917100   | 1.41873400 | -0.56081900                |
| O                                            | -3.18520000  | 3.82770300 | -1.68645600                |
| Zero-point correction=                       |              |            | 0.623466(Hartree/Particle) |
| Thermal correction to Energy=                |              |            | 0.665729                   |
| Thermal correction to Enthalpy=              |              |            | 0.666673                   |
| Thermal correction to Gibbs Free Energy=     |              |            | 0.547226                   |
| Sum of electronic and zero-point Energies=   |              |            | -2177.215241               |
| Sum of electronic and thermal Energies=      |              |            | -2177.172979               |
| Sum of electronic and thermal Enthalpies=    |              |            | -2177.172035               |
| Sum of electronic and thermal Free Energies= |              |            | -2177.291482               |
| E(RM06L) =                                   | -2177.838708 | A.U.       |                            |

### B-5a-Co

1 1

Number of imaginary frequencies: 0

|   |             |             |             |
|---|-------------|-------------|-------------|
| C | -2.19764700 | -0.83392800 | -0.02621300 |
| C | -2.97518300 | -2.07577300 | -0.22439900 |
| C | -2.87835700 | -3.12122200 | 0.70335400  |
| C | -3.80784700 | -2.23813300 | -1.34020700 |
| C | -3.56899600 | -4.31171200 | 0.50729600  |
| H | -2.28502900 | -2.96987300 | 1.60343500  |
| C | -4.49100900 | -3.43093600 | -1.54022400 |
| H | -3.89836300 | -1.42909900 | -2.06197000 |
| C | -4.37035500 | -4.47138700 | -0.62005500 |
| H | -3.49377700 | -5.10954400 | 1.24019500  |
| H | -5.11896900 | -3.55190100 | -2.41766400 |
| H | -4.91034800 | -5.40005300 | -0.77653400 |

|   |             |             |             |
|---|-------------|-------------|-------------|
| C | -0.89647400 | -0.84500200 | 0.35531000  |
| P | 0.24944500  | -2.17452000 | 0.09447700  |
| C | 2.89318200  | -1.05730200 | -0.22139700 |
| C | 4.23947600  | -1.01667200 | -0.61318900 |
| C | 5.27299700  | -1.20430300 | 0.33128900  |
| C | 4.57031500  | -0.79263400 | -1.96850400 |
| C | 6.59714900  | -1.15619000 | -0.07162600 |
| H | 5.01527300  | -1.39103500 | 1.37045800  |
| C | 5.89903500  | -0.74777100 | -2.35824700 |
| H | 3.77026800  | -0.67800200 | -2.69443100 |
| C | 6.91044500  | -0.92630200 | -1.41277600 |
| H | 7.39003300  | -1.30211100 | 0.65452300  |
| H | 6.15267900  | -0.58158100 | -3.40008500 |
| H | 7.94998900  | -0.89289800 | -1.72408000 |
| C | 1.68839200  | -1.03206600 | 0.09828900  |
| C | 0.54992900  | -3.14431900 | 1.59846600  |
| H | 1.55122400  | -3.57859400 | 1.56107000  |
| H | 0.44962700  | -2.53394500 | 2.49844200  |
| H | -0.18174500 | -3.95491400 | 1.62439900  |
| O | 0.16804400  | -2.98195500 | -1.15870000 |
| C | -2.91737300 | 0.43260400  | -0.20109600 |
| C | -1.13553200 | 1.35384000  | -1.66387200 |
| C | -0.25826600 | 1.56435700  | -3.89040900 |
| C | 1.01803300  | 1.41696600  | -3.35649700 |
| C | 1.14524900  | 1.20291600  | -1.99674800 |
| N | 0.09166000  | 1.15136000  | -1.15450700 |
| H | -0.40635100 | 1.71023600  | -4.95509900 |

|   |             |             |             |
|---|-------------|-------------|-------------|
| H | 1.90444100  | 1.45623500  | -3.97947700 |
| H | 2.11525900  | 1.05320000  | -1.53433800 |
| N | -2.27070200 | 1.50264400  | -0.80680400 |
| C | -0.06470100 | 0.78788900  | 2.70557500  |
| C | 1.33727900  | 0.58161600  | 2.57062900  |
| C | 1.88227700  | 1.64600200  | 1.74478500  |
| C | 0.81672000  | 2.49564100  | 1.38418800  |
| C | -0.40394200 | 1.96214400  | 1.95343700  |
| C | -1.70254100 | 2.67831700  | 2.02972800  |
| H | -2.56265000 | 2.01378500  | 1.90779100  |
| H | -1.79853200 | 3.13722300  | 3.02179600  |
| H | -1.76830100 | 3.48375300  | 1.29682900  |
| C | -1.02752700 | -0.01145100 | 3.50858800  |
| H | -0.66437200 | -1.02333500 | 3.70631000  |
| H | -1.20727100 | 0.46522100  | 4.47891100  |
| H | -1.99267600 | -0.09786900 | 3.00040600  |
| C | 2.15881400  | -0.44539500 | 3.26443000  |
| H | 2.79864300  | -1.00348900 | 2.57361600  |
| H | 2.81642600  | 0.04354300  | 3.99209900  |
| H | 1.54681100  | -1.16208100 | 3.81553700  |
| C | 3.32296600  | 1.83376600  | 1.42147600  |
| H | 3.47530200  | 2.21578200  | 0.40699900  |
| H | 3.78432600  | 2.55596500  | 2.10484500  |
| H | 3.88347600  | 0.90003600  | 1.51222500  |
| C | 0.88935000  | 3.71155100  | 0.53355800  |
| H | 0.91920500  | 4.60894200  | 1.16205600  |
| H | 1.79049000  | 3.72184600  | -0.08513400 |

|                                              |              |             |                             |
|----------------------------------------------|--------------|-------------|-----------------------------|
| H                                            | 0.01746400   | 3.80729100  | -0.12341900                 |
| Co                                           | 0.41220700   | 0.53624300  | 0.70150200                  |
| C                                            | -4.20207600  | 0.60736100  | 0.25341500                  |
| H                                            | -4.69939600  | -0.23691900 | 0.71630900                  |
| C                                            | -2.83045300  | 2.83408400  | -0.86481900                 |
| C                                            | -4.17667400  | 2.93799500  | -0.38199800                 |
| H                                            | -4.63171000  | 3.91844300  | -0.45992700                 |
| C                                            | -4.83674800  | 1.86395300  | 0.14182200                  |
| H                                            | -5.85630700  | 1.97790100  | 0.49953400                  |
| O                                            | -2.13949400  | 3.74773100  | -1.30776900                 |
| C                                            | -1.34134600  | 1.54504700  | -3.02796900                 |
| H                                            | -2.35288500  | 1.70153700  | -3.38476200                 |
| Zero-point correction=                       |              |             | 0.625674 (Hartree/Particle) |
| Thermal correction to Energy=                |              |             | 0.666630                    |
| Thermal correction to Enthalpy=              |              |             | 0.667574                    |
| Thermal correction to Gibbs Free Energy=     |              |             | 0.553592                    |
| Sum of electronic and zero-point Energies=   |              |             | -2177.244796                |
| Sum of electronic and thermal Energies=      |              |             | -2177.203840                |
| Sum of electronic and thermal Enthalpies=    |              |             | -2177.202896                |
| Sum of electronic and thermal Free Energies= |              |             | -2177.316878                |
| E(RM06L) =                                   | -2177.870470 | A.U.        |                             |

### B-6-Co

1 1

Number of imaginary frequencies: 0

|   |            |             |             |
|---|------------|-------------|-------------|
| C | 3.82574500 | -0.11528700 | -1.44675500 |
| C | 5.10077300 | 0.32789500  | -1.02225700 |
| C | 5.97146900 | -0.54428600 | -0.34294200 |

|   |             |             |             |
|---|-------------|-------------|-------------|
| C | 5.51460200  | 1.65104000  | -1.26120200 |
| C | 7.21221500  | -0.09796000 | 0.08266000  |
| H | 5.66424000  | -1.57142100 | -0.16394600 |
| C | 6.75956000  | 2.08033700  | -0.82964300 |
| H | 4.85323000  | 2.32696500  | -1.79619000 |
| C | 7.63236500  | 1.21764300  | -0.15360400 |
| H | 7.87636200  | -0.78197800 | 0.60484800  |
| H | 7.06932800  | 3.10430500  | -1.02293600 |
| C | 2.69330800  | -0.47702500 | -1.73829900 |
| P | 1.21794200  | -1.07088600 | -2.47369100 |
| C | -1.32086000 | -0.86023200 | -1.40541700 |
| C | -2.68291500 | -0.70178700 | -1.69555100 |
| C | -3.18105700 | 0.58898200  | -1.98119700 |
| C | -3.57198000 | -1.79481000 | -1.69140600 |
| C | -4.52629000 | 0.77266700  | -2.23403000 |
| H | -2.49709400 | 1.43451400  | -1.98451700 |
| C | -4.91822500 | -1.58978300 | -1.93732800 |
| H | -3.19041600 | -2.79144000 | -1.49019500 |
| C | -5.42206300 | -0.30721400 | -2.19991900 |
| H | -4.90289800 | 1.77222500  | -2.43562400 |
| H | -5.60113300 | -2.43504000 | -1.92723400 |
| C | -0.07884200 | -0.92371600 | -1.22496100 |
| C | 0.78163700  | 0.24686600  | -3.63390000 |
| H | -0.17908300 | 0.01049900  | -4.09760800 |
| H | 0.70886000  | 1.20915900  | -3.11833800 |
| H | 1.54463600  | 0.31059500  | -4.41204800 |
| O | 1.30407000  | -2.45046600 | -3.03572300 |

|   |             |             |             |
|---|-------------|-------------|-------------|
| C | -4.04309300 | 0.85070800  | 1.23528800  |
| C | -3.18753700 | 1.93774800  | 0.94424700  |
| C | -3.65757000 | 3.22751300  | 0.72257400  |
| C | -5.03684500 | 3.41523200  | 0.78843000  |
| C | -5.90576800 | 2.35342900  | 1.07033800  |
| C | -5.42148300 | 1.07035700  | 1.30037700  |
| C | -3.22716900 | -0.32736700 | 1.36438700  |
| C | -1.91888300 | 0.00334600  | 1.15256700  |
| H | -2.98052900 | 4.04385800  | 0.50487100  |
| H | -5.44246200 | 4.40799000  | 0.62000000  |
| H | -6.97512100 | 2.53916800  | 1.11568400  |
| H | -6.10030700 | 0.24936400  | 1.51674300  |
| H | -3.60967600 | -1.32396500 | 1.53900800  |
| C | -0.69626900 | 1.99192500  | 0.64873900  |
| N | -0.61771200 | 3.29905300  | 0.39579300  |
| C | 0.60371500  | 3.78713600  | 0.18935700  |
| C | 1.75221800  | 3.00034000  | 0.22645400  |
| C | 1.57035500  | 1.64717800  | 0.46655900  |
| N | 0.35589500  | 1.12200000  | 0.67450500  |
| H | 0.65956800  | 4.85460300  | -0.01539100 |
| H | 2.74166400  | 3.41048500  | 0.06857300  |
| H | 2.40077700  | 0.95160200  | 0.47528100  |
| N | -1.89111200 | 1.39974300  | 0.89956900  |
| C | -0.61968600 | -2.07357800 | 2.48080500  |
| C | -0.24431000 | -2.81022800 | 1.31993900  |
| C | 1.14114400  | -2.49968000 | 1.02176200  |
| C | 1.56500800  | -1.49531100 | 1.91532300  |

|    |             |             |             |
|----|-------------|-------------|-------------|
| C  | 0.45200000  | -1.16632300 | 2.78123800  |
| C  | 0.46048500  | -0.17426900 | 3.88829300  |
| H  | -0.53921300 | 0.23105100  | 4.06569500  |
| H  | 0.80183800  | -0.63069400 | 4.82488400  |
| H  | 1.12767700  | 0.66513500  | 3.67502800  |
| C  | -1.82958700 | -2.27788300 | 3.31419500  |
| H  | -2.61525300 | -2.81725900 | 2.78271700  |
| H  | -1.54721400 | -2.89130500 | 4.17813000  |
| H  | -2.24726500 | -1.34369600 | 3.69212300  |
| C  | -1.06176700 | -3.82346800 | 0.60322400  |
| H  | -0.84411500 | -3.81826800 | -0.46938600 |
| H  | -0.85264500 | -4.83457100 | 0.97160500  |
| H  | -2.13204300 | -3.64077800 | 0.73535800  |
| C  | 1.97695900  | -3.22909700 | 0.03615800  |
| H  | 2.87516200  | -2.67226600 | -0.23968400 |
| H  | 2.30103400  | -4.17815100 | 0.48064600  |
| H  | 1.44418000  | -3.47025100 | -0.88653900 |
| C  | 2.94039100  | -0.94445600 | 2.03174300  |
| H  | 3.54062100  | -1.58560500 | 2.68821900  |
| H  | 3.45272700  | -0.90454100 | 1.06646600  |
| H  | 2.95350800  | 0.05444400  | 2.47518400  |
| Co | -0.17413000 | -0.79827000 | 0.88822800  |
| C  | -6.88114400 | -0.07990900 | -2.41763600 |
| H  | -7.06600800 | 0.48037200  | -3.33888300 |
| H  | -7.44021300 | -1.01581300 | -2.46956500 |
| H  | -7.30106900 | 0.51851700  | -1.60107900 |
| C  | 8.98792600  | 1.67872100  | 0.27594900  |

|                                              |              |            |                             |
|----------------------------------------------|--------------|------------|-----------------------------|
| H                                            | 9.72941000   | 1.48797800 | -0.50795800                 |
| H                                            | 9.00731600   | 2.75223300 | 0.47759600                  |
| H                                            | 9.33074000   | 1.15435800 | 1.17100800                  |
| Zero-point correction=                       |              |            | 0.703368 (Hartree/Particle) |
| Thermal correction to Energy=                |              |            | 0.750226                    |
| Thermal correction to Enthalpy=              |              |            | 0.751170                    |
| Thermal correction to Gibbs Free Energy=     |              |            | 0.620917                    |
| Sum of electronic and zero-point Energies=   |              |            | -2312.109778                |
| Sum of electronic and thermal Energies=      |              |            | -2312.062920                |
| Sum of electronic and thermal Enthalpies=    |              |            | -2312.061976                |
| Sum of electronic and thermal Free Energies= |              |            | -2312.192230                |
| E(RM06L) =                                   | -2312.813147 | A.U.       |                             |

**(S)B-7-Co**

1 1

Number of imaginary frequencies: 0

|   |             |             |             |
|---|-------------|-------------|-------------|
| C | -2.04919200 | -0.59811700 | -0.07339300 |
| C | -3.19269400 | -1.49853600 | -0.35008800 |
| C | -3.39976100 | -2.64082400 | 0.43160600  |
| C | -4.08493100 | -1.24280700 | -1.40208500 |
| C | -4.44547000 | -3.51475300 | 0.15612200  |
| H | -2.75340300 | -2.81617000 | 1.28926400  |
| C | -5.11859300 | -2.12336000 | -1.67851200 |
| H | -3.95028600 | -0.35332700 | -2.01234800 |
| C | -5.31699500 | -3.27942000 | -0.91018900 |
| H | -4.59919600 | -4.38748800 | 0.78686700  |
| H | -5.79011000 | -1.91636100 | -2.50851200 |
| C | -0.81236200 | -1.11020900 | 0.15261100  |

|   |             |             |             |
|---|-------------|-------------|-------------|
| P | -0.16645700 | -2.65947200 | -0.43321700 |
| C | 2.54119100  | -1.37450600 | -0.26262900 |
| C | 3.86866700  | -0.97132200 | -0.57974700 |
| C | 4.88498200  | -1.94353100 | -0.63846800 |
| C | 4.20125800  | 0.36943900  | -0.83611200 |
| C | 6.18409700  | -1.57367700 | -0.94624100 |
| H | 4.64060200  | -2.98247900 | -0.43847900 |
| C | 5.50583200  | 0.72291800  | -1.14499200 |
| H | 3.42608900  | 1.12979000  | -0.76908700 |
| C | 6.52265900  | -0.23858300 | -1.20757000 |
| H | 6.95818200  | -2.33584100 | -0.98468700 |
| H | 5.74748100  | 1.76550400  | -1.33714100 |
| C | 1.47892100  | -2.01080100 | -0.11332500 |
| C | -0.34187700 | -4.04304800 | 0.72370100  |
| H | 0.48558800  | -4.74119800 | 0.57603600  |
| H | -0.35707300 | -3.71628600 | 1.76570300  |
| H | -1.27659000 | -4.55806600 | 0.49227000  |
| O | -0.38665700 | -3.03478900 | -1.86197500 |
| C | -3.49629900 | 2.77783400  | 0.27138900  |
| C | -2.25176700 | 3.08147000  | -0.32092600 |
| C | -1.85779100 | 4.39388800  | -0.57200400 |
| C | -2.74862300 | 5.40405300  | -0.23226200 |
| C | -3.99648400 | 5.12072600  | 0.34529200  |
| C | -4.37803700 | 3.81548900  | 0.60527100  |
| C | -3.55274900 | 1.36356600  | 0.42566100  |
| C | -2.37050500 | 0.81615700  | -0.00485500 |
| H | -0.90327000 | 4.62404400  | -1.03057100 |

|   |             |             |             |
|---|-------------|-------------|-------------|
| H | -2.47117900 | 6.43612500  | -0.42232000 |
| H | -4.66614200 | 5.93818800  | 0.59274700  |
| H | -5.33788100 | 3.59353300  | 1.06168700  |
| H | -4.37562900 | 0.78039000  | 0.81760800  |
| C | -0.47431700 | 1.74293400  | -1.35368500 |
| N | -0.49875800 | 2.56571100  | -2.40088300 |
| C | 0.37582700  | 2.36885600  | -3.37880600 |
| C | 1.23956800  | 1.28028400  | -3.36757900 |
| C | 1.26964500  | 0.54154500  | -2.20151100 |
| N | 0.49193300  | 0.81257400  | -1.12831300 |
| H | 0.35137000  | 3.08178700  | -4.20039300 |
| H | 1.88693700  | 1.03215800  | -4.19915900 |
| H | 1.94839000  | -0.29377800 | -2.10250700 |
| N | -1.53424800 | 1.87725100  | -0.46375000 |
| C | 0.03692000  | -0.00811700 | 2.62593500  |
| C | 1.26413800  | -0.73183900 | 2.61750500  |
| C | 2.32306800  | 0.17581400  | 2.21445800  |
| C | 1.72804000  | 1.39916100  | 1.85199600  |
| C | 0.30849100  | 1.30174500  | 2.12241800  |
| C | -0.59129200 | 2.47569700  | 2.24550500  |
| H | -1.64786900 | 2.21575300  | 2.15473900  |
| H | -0.44973000 | 2.90793400  | 3.24464600  |
| H | -0.36729500 | 3.26470100  | 1.52560500  |
| C | -1.26995200 | -0.49309900 | 3.13748300  |
| H | -1.38041300 | -1.57329800 | 3.01040500  |
| H | -1.35509400 | -0.27460700 | 4.20826600  |
| H | -2.10929500 | -0.00942100 | 2.63077900  |

|                                            |             |             |                             |
|--------------------------------------------|-------------|-------------|-----------------------------|
| C                                          | 1.50180300  | -2.10023000 | 3.14824300                  |
| H                                          | 2.06895000  | -2.72271400 | 2.44824000                  |
| H                                          | 2.08328300  | -2.04934700 | 4.07602900                  |
| H                                          | 0.56786600  | -2.61404400 | 3.38405200                  |
| C                                          | 3.76839100  | -0.12687300 | 2.37410200                  |
| H                                          | 4.41376600  | 0.52552400  | 1.78374400                  |
| H                                          | 4.03312900  | 0.01503100  | 3.42926000                  |
| H                                          | 4.01076800  | -1.16276000 | 2.12404500                  |
| C                                          | 2.40832000  | 2.63927700  | 1.38867100                  |
| H                                          | 2.38886700  | 3.40798500  | 2.16948200                  |
| H                                          | 3.45484700  | 2.46008400  | 1.13114000                  |
| H                                          | 1.91142900  | 3.07111300  | 0.51201200                  |
| Co                                         | 0.81941900  | -0.15189000 | 0.67583800                  |
| C                                          | -6.42993300 | -4.22689000 | -1.22904600                 |
| H                                          | -7.37653900 | -3.70066300 | -1.38250200                 |
| H                                          | -6.22473200 | -4.77757400 | -2.15336500                 |
| H                                          | -6.57712200 | -4.96283000 | -0.43563600                 |
| C                                          | 7.92498800  | 0.13977800  | -1.55944800                 |
| H                                          | 8.65290800  | -0.38236700 | -0.93292600                 |
| H                                          | 8.15358000  | -0.13053900 | -2.59617100                 |
| H                                          | 8.09504100  | 1.21364100  | -1.45875000                 |
| Zero-point correction=                     |             |             | 0.705993 (Hartree/Particle) |
| Thermal correction to Energy=              |             |             | 0.751222                    |
| Thermal correction to Enthalpy=            |             |             | 0.752166                    |
| Thermal correction to Gibbs Free Energy=   |             |             | 0.628600                    |
| Sum of electronic and zero-point Energies= |             |             | -2312.127685                |
| Sum of electronic and thermal Energies=    |             |             | -2312.082457                |

Sum of electronic and thermal Enthalpies= -2312.081513

Sum of electronic and thermal Free Energies= -2312.205078

E(RM06L) = -2312.833679 A.U.

**(T)B-7-Co**

1 3

Number of imaginary frequencies: 0

|   |             |             |             |
|---|-------------|-------------|-------------|
| C | -2.31050000 | -0.12386000 | -0.28716400 |
| C | -3.62063600 | 0.43177000  | -0.36599100 |
| C | -3.66742700 | 1.80597300  | -0.97782600 |
| C | -4.79326300 | -0.10482100 | 0.18448700  |
| C | -4.85979400 | 2.62219900  | -0.63533500 |
| H | -3.65080000 | 1.67007900  | -2.07662000 |
| C | -5.93114900 | 0.66992300  | 0.32036300  |
| H | -4.78262500 | -1.11500900 | 0.58430400  |
| C | -5.93984000 | 2.04917000  | -0.05091600 |
| H | -4.86405900 | 3.67263400  | -0.91198600 |
| H | -6.81428100 | 0.24109800  | 0.78365900  |
| H | -6.82367300 | 2.64464800  | 0.15520100  |
| C | -1.28137900 | 0.82302700  | -0.45597300 |
| P | -1.98001100 | 2.49986100  | -0.64379000 |
| C | 1.23633600  | 1.33003600  | -0.13442300 |
| C | 2.07353500  | 2.39329200  | 0.31967400  |
| C | 1.52384100  | 3.68204600  | 0.50338000  |
| C | 3.43197500  | 2.18537400  | 0.62638400  |
| C | 2.32849400  | 4.71766500  | 0.95605700  |
| H | 0.46196100  | 3.84407700  | 0.33257800  |
| C | 4.22539200  | 3.22880100  | 1.07938100  |

|   |             |             |             |
|---|-------------|-------------|-------------|
| H | 3.84743200  | 1.18880500  | 0.50404200  |
| C | 3.67788400  | 4.50188600  | 1.23790200  |
| H | 1.89471600  | 5.70268600  | 1.09917900  |
| H | 5.27174200  | 3.05219300  | 1.31022600  |
| H | 4.29835900  | 5.32043700  | 1.58923000  |
| C | 0.10354500  | 0.76964300  | -0.36449000 |
| C | -1.31975000 | 3.13911100  | -2.20445600 |
| H | -0.24271100 | 3.29675000  | -2.09321900 |
| H | -1.49082300 | 2.45046500  | -3.03573800 |
| H | -1.77735700 | 4.10409400  | -2.43384100 |
| O | -1.81089600 | 3.43655700  | 0.51046900  |
| C | 1.50183800  | -2.29542200 | -1.58144300 |
| C | 1.54973500  | -1.08034200 | -2.29567400 |
| C | 2.77811600  | -0.38546000 | -1.92879400 |
| C | 3.48118700  | -1.20142400 | -0.99702900 |
| C | 2.65785400  | -2.33876600 | -0.71253200 |
| C | 2.98641900  | -3.43699200 | 0.23541700  |
| H | 2.09726000  | -3.80569900 | 0.75606200  |
| H | 3.43678900  | -4.28315600 | -0.29676400 |
| H | 3.70742600  | -3.11230200 | 0.99052300  |
| C | 0.51822200  | -3.39066200 | -1.77178400 |
| H | -0.50931400 | -3.02446400 | -1.85460500 |
| H | 0.73883600  | -3.92845200 | -2.70143000 |
| H | 0.56536100  | -4.11946000 | -0.96115800 |
| C | 0.56019100  | -0.59821200 | -3.29452300 |
| H | 0.47113700  | 0.49190400  | -3.27596900 |
| H | 0.86107700  | -0.88160100 | -4.30997600 |

|   |             |             |             |
|---|-------------|-------------|-------------|
| H | -0.43239300 | -1.02136700 | -3.11367200 |
| C | 3.24746000  | 0.87805100  | -2.55713800 |
| H | 4.01168700  | 1.38056000  | -1.96023500 |
| H | 3.67653600  | 0.67239500  | -3.54459300 |
| H | 2.42665900  | 1.58695100  | -2.70141800 |
| C | 4.83313200  | -0.95927900 | -0.41881400 |
| H | 5.54070600  | -1.70776100 | -0.79234700 |
| H | 5.22816900  | 0.02165700  | -0.69149500 |
| H | 4.84712100  | -1.03990800 | 0.67348700  |
| C | -2.14530600 | -1.56453300 | -0.06362900 |
| C | -0.50916000 | -1.27163300 | 1.77214400  |
| C | -0.47555500 | -0.29899100 | 3.95753400  |
| C | 0.88521400  | -0.06682200 | 3.78936400  |
| C | 1.47427300  | -0.42179400 | 2.58616000  |
| N | 0.79070400  | -0.99853500 | 1.58056000  |
| H | -0.97833200 | -0.01380000 | 4.87559000  |
| H | 1.48280600  | 0.39507900  | 4.56635000  |
| H | 2.52539200  | -0.21945100 | 2.39093700  |
| N | -1.17288400 | -2.06650700 | 0.78762600  |
| C | -2.94625000 | -2.45882000 | -0.73900200 |
| H | -3.67275200 | -2.06798900 | -1.44068600 |
| C | -0.94722200 | -3.48242200 | 1.00010600  |
| C | -1.87362000 | -4.34332700 | 0.32188000  |
| H | -1.75767100 | -5.40406300 | 0.51190000  |
| C | -2.82858800 | -3.84811000 | -0.51565800 |
| H | -3.50374700 | -4.52605600 | -1.03033500 |
| O | -0.02709400 | -3.83112600 | 1.73027600  |

|                                              |              |             |                             |
|----------------------------------------------|--------------|-------------|-----------------------------|
| C                                            | -1.17924400  | -0.92835900 | 2.93776400                  |
| H                                            | -2.23219800  | -1.17160400 | 3.03482500                  |
| Co                                           | 1.57574600   | -0.62770200 | -0.24558600                 |
| Zero-point correction=                       |              |             | 0.624244 (Hartree/Particle) |
| Thermal correction to Energy=                |              |             | 0.665000                    |
| Thermal correction to Enthalpy=              |              |             | 0.665944                    |
| Thermal correction to Gibbs Free Energy=     |              |             | 0.552354                    |
| Sum of electronic and zero-point Energies=   |              |             | -2177.234329                |
| Sum of electronic and thermal Energies=      |              |             | -2177.193573                |
| Sum of electronic and thermal Enthalpies=    |              |             | -2177.192629                |
| Sum of electronic and thermal Free Energies= |              |             | -2177.306219                |
| E(RM06L) =                                   | -2177.858573 | A.U.        |                             |

### B-8-Co

1 1

Number of imaginary frequencies: 0

|   |             |            |             |
|---|-------------|------------|-------------|
| C | -2.25530500 | 0.16781600 | -0.11978900 |
| C | -3.52716200 | 0.90901100 | -0.24463400 |
| C | -3.75978900 | 1.73287100 | -1.35468000 |
| C | -4.49866900 | 0.84126100 | 0.76535300  |
| C | -4.92509400 | 2.48544800 | -1.44747600 |
| H | -3.03029300 | 1.74425800 | -2.16277800 |
| C | -5.65612000 | 1.60273400 | 0.67635100  |
| H | -4.31924000 | 0.21269900 | 1.63415200  |
| C | -5.87193700 | 2.42690900 | -0.42778900 |
| H | -5.09990400 | 3.10868800 | -2.31956300 |
| H | -6.39095800 | 1.56074000 | 1.47433600  |
| H | -6.78018600 | 3.01767700 | -0.49533200 |

|   |             |             |             |
|---|-------------|-------------|-------------|
| C | -1.10773900 | 0.88212100  | -0.33021900 |
| P | -0.81193100 | 2.68612300  | -0.22042600 |
| C | 0.82319100  | 1.92816000  | -0.02231500 |
| C | 2.11041300  | 2.45784100  | 0.33272100  |
| C | 3.24273200  | 1.63433100  | 0.48374800  |
| C | 2.26325600  | 3.83468200  | 0.58586200  |
| C | 4.47322000  | 2.15105800  | 0.85818000  |
| H | 3.13574900  | 0.56109300  | 0.30994900  |
| C | 3.49556300  | 4.35545300  | 0.95886800  |
| H | 1.39476000  | 4.48592100  | 0.51696600  |
| C | 4.60439000  | 3.52113600  | 1.09359800  |
| H | 5.33189000  | 1.49349000  | 0.96937000  |
| H | 3.59184600  | 5.41901800  | 1.15336800  |
| H | 5.56565100  | 3.93264100  | 1.38456800  |
| C | 0.31890800  | 0.65004100  | -0.22384600 |
| C | -0.84455000 | 3.47391000  | -1.85927600 |
| H | -0.15054500 | 4.31821400  | -1.86023000 |
| H | -0.55977700 | 2.77994600  | -2.65433700 |
| H | -1.84751600 | 3.85941000  | -2.05179400 |
| O | -1.41519000 | 3.51937100  | 0.86251900  |
| C | 2.30948000  | -0.67053600 | -2.06058500 |
| C | 3.12999700  | -1.57111300 | -1.26304100 |
| C | 2.35931400  | -2.69743200 | -0.90590700 |
| C | 1.04361400  | -2.51272500 | -1.46567000 |
| C | 1.02282500  | -1.27636300 | -2.20991600 |
| C | -0.11345000 | -0.77930400 | -3.02649000 |
| H | -0.08953200 | 0.30767600  | -3.13379000 |

|   |             |             |             |
|---|-------------|-------------|-------------|
| H | -0.07134200 | -1.21443400 | -4.03163400 |
| H | -1.07848100 | -1.05056600 | -2.58853000 |
| C | 2.76098500  | 0.59270100  | -2.69783200 |
| H | 3.53449600  | 1.09890100  | -2.11587400 |
| H | 3.17905000  | 0.38473800  | -3.68982100 |
| H | 1.93385200  | 1.29478900  | -2.82810800 |
| C | 4.54545100  | -1.33386800 | -0.87734800 |
| H | 4.74550200  | -1.61989400 | 0.16021700  |
| H | 5.20597700  | -1.94621900 | -1.50219100 |
| H | 4.84390900  | -0.29233100 | -1.01260100 |
| C | 2.81307900  | -3.86080000 | -0.09728700 |
| H | 1.98195000  | -4.37393400 | 0.39525000  |
| H | 3.31199100  | -4.60191400 | -0.73133000 |
| H | 3.53153800  | -3.56807700 | 0.67419000  |
| C | -0.06200600 | -3.49397800 | -1.41004000 |
| H | 0.00549100  | -4.15018700 | -2.28751800 |
| H | -0.00741600 | -4.13290100 | -0.52625000 |
| H | -1.04638300 | -3.01800900 | -1.44798700 |
| C | -2.38974400 | -1.25879700 | 0.22092300  |
| C | -0.45704000 | -1.23609700 | 1.70737300  |
| C | 1.85628500  | -0.87396400 | 2.28265300  |
| C | 1.46468400  | 0.33048800  | 2.85405000  |
| C | 0.09807000  | 0.62567100  | 2.90117000  |
| N | -0.84596400 | -0.14273300 | 2.35080400  |
| H | 2.89075100  | -1.20599900 | 2.33731700  |
| H | 2.18761300  | 1.00495200  | 3.30004600  |
| H | -0.26011500 | 1.51219200  | 3.41993500  |

|                                              |              |             |                             |
|----------------------------------------------|--------------|-------------|-----------------------------|
| N                                            | -1.47617000  | -1.94836700 | 1.02024200                  |
| C                                            | -3.45507000  | -1.96397900 | -0.29717200                 |
| H                                            | -4.15438700  | -1.43714900 | -0.93411600                 |
| C                                            | -1.58042500  | -3.36244800 | 1.31330500                  |
| C                                            | -2.73847300  | -4.00569800 | 0.76593800                  |
| H                                            | -2.84832100  | -5.05587700 | 1.00921600                  |
| C                                            | -3.63413000  | -3.33330500 | -0.01117600                 |
| H                                            | -4.49492100  | -3.85262400 | -0.42274600                 |
| O                                            | -0.70964400  | -3.91702400 | 1.97779100                  |
| C                                            | 0.88529800   | -1.70496100 | 1.68226100                  |
| H                                            | 1.08667700   | -2.74446100 | 1.46239900                  |
| Co                                           | 1.39773700   | -0.90055800 | -0.26656900                 |
| Zero-point correction=                       |              |             | 0.625235 (Hartree/Particle) |
| Thermal correction to Energy=                |              |             | 0.665761                    |
| Thermal correction to Enthalpy=              |              |             | 0.666706                    |
| Thermal correction to Gibbs Free Energy=     |              |             | 0.553672                    |
| Sum of electronic and zero-point Energies=   |              |             | -2177.232632                |
| Sum of electronic and thermal Energies=      |              |             | -2177.192105                |
| Sum of electronic and thermal Enthalpies=    |              |             | -2177.191161                |
| Sum of electronic and thermal Free Energies= |              |             | -2177.304195                |
| E(RM06L) =                                   | -2177.857866 | A.U.        |                             |

**(T)B-8-Co**

1 3

Number of imaginary frequencies: 0

|   |            |            |            |
|---|------------|------------|------------|
| C | 2.24417200 | 0.10249100 | 0.15311800 |
| C | 3.55703300 | 0.76587000 | 0.27150500 |
| C | 3.83975900 | 1.57389500 | 1.38185600 |

|   |             |            |             |
|---|-------------|------------|-------------|
| C | 4.52050600  | 0.64345000 | -0.74090500 |
| C | 5.04592200  | 2.25928900 | 1.47181400  |
| H | 3.11589700  | 1.62270000 | 2.19331700  |
| C | 5.72030800  | 1.33700000 | -0.65332000 |
| H | 4.30355600  | 0.02731200 | -1.60989400 |
| C | 5.98565100  | 2.14716400 | 0.45030700  |
| H | 5.25833100  | 2.87027600 | 2.34418600  |
| H | 6.45016300  | 1.25239800 | -1.45256500 |
| H | 6.92708300  | 2.68362400 | 0.51638900  |
| C | 1.13701900  | 0.86294300 | 0.39762800  |
| P | 0.90645500  | 2.67702700 | 0.28633300  |
| C | -0.76993800 | 1.98735200 | 0.12747200  |
| C | -2.04496300 | 2.56896400 | -0.18647900 |
| C | -3.16950500 | 1.78139600 | -0.50455000 |
| C | -2.19020500 | 3.96972500 | -0.20933300 |
| C | -4.39376000 | 2.36371800 | -0.79375300 |
| H | -3.06374900 | 0.69711200 | -0.53048500 |
| C | -3.41518200 | 4.55249200 | -0.50310700 |
| H | -1.32618400 | 4.59771600 | -0.00519000 |
| C | -4.52159400 | 3.75424500 | -0.79070700 |
| H | -5.24897400 | 1.73905800 | -1.03855200 |
| H | -3.50831300 | 5.63377300 | -0.51485900 |
| H | -5.47679700 | 4.21228200 | -1.02741000 |
| C | -0.30250200 | 0.69741100 | 0.31062300  |
| C | 0.99831100  | 3.45968400 | 1.92414900  |
| H | 0.36863500  | 4.35249500 | 1.93413300  |
| H | 0.66855500  | 2.78153900 | 2.71528900  |

|   |             |             |             |
|---|-------------|-------------|-------------|
| H | 2.02851700  | 3.76881500  | 2.11106700  |
| O | 1.53356100  | 3.46465600  | -0.81623200 |
| C | -2.40016100 | -0.73228500 | 1.93509800  |
| C | -3.15781300 | -1.57553800 | 1.07849100  |
| C | -2.37031400 | -2.74906600 | 0.81353200  |
| C | -1.14132800 | -2.66309600 | 1.53353300  |
| C | -1.12203600 | -1.40435000 | 2.19871700  |
| C | -0.05994100 | -0.91711100 | 3.11687000  |
| H | -0.06446400 | 0.17261000  | 3.20072100  |
| H | -0.20638600 | -1.32713300 | 4.12314000  |
| H | 0.93643200  | -1.22341200 | 2.78277200  |
| C | -2.83782100 | 0.53027100  | 2.58459200  |
| H | -3.68251000 | 0.99052900  | 2.06775800  |
| H | -3.14897800 | 0.33171500  | 3.61687200  |
| H | -2.03235200 | 1.26962000  | 2.62434600  |
| C | -4.53790500 | -1.32985600 | 0.57117700  |
| H | -4.62960100 | -1.53353900 | -0.50165600 |
| H | -5.26244900 | -1.97807800 | 1.07592200  |
| H | -4.85219500 | -0.29729400 | 0.74125400  |
| C | -2.78438400 | -3.87886700 | -0.05994100 |
| H | -1.93192700 | -4.34067500 | -0.56685800 |
| H | -3.27330700 | -4.65950000 | 0.53451200  |
| H | -3.50695900 | -3.56353300 | -0.81835300 |
| C | -0.08903600 | -3.70972100 | 1.63203000  |
| H | -0.18930500 | -4.26274400 | 2.57305300  |
| H | -0.15629800 | -4.43500100 | 0.81852500  |
| H | 0.91907400  | -3.28119900 | 1.62572600  |

|    |             |             |             |
|----|-------------|-------------|-------------|
| C  | 2.27063100  | -1.31994000 | -0.22529500 |
| C  | 0.42778500  | -1.08835000 | -1.81068500 |
| C  | -1.72504600 | -0.42522000 | -2.67666000 |
| C  | -1.11978400 | 0.71900900  | -3.16597200 |
| C  | 0.26698700  | 0.83986900  | -3.01998100 |
| N  | 1.02749000  | -0.04499000 | -2.37185900 |
| H  | -2.78296700 | -0.61378300 | -2.84118000 |
| H  | -1.68527400 | 1.48124600  | -3.69018400 |
| H  | 0.79891900  | 1.68298300  | -3.45528700 |
| N  | 1.26139900  | -1.91111500 | -1.00003700 |
| C  | 3.28903800  | -2.12009800 | 0.23542400  |
| H  | 4.05105400  | -1.66673300 | 0.85726500  |
| C  | 1.18265100  | -3.34483000 | -1.21554300 |
| C  | 2.32903800  | -4.08528700 | -0.77524600 |
| H  | 2.31774400  | -5.14310500 | -1.00999000 |
| C  | 3.33834800  | -3.49685200 | -0.07532400 |
| H  | 4.17867400  | -4.09072300 | 0.27219800  |
| O  | 0.19227800  | -3.83835100 | -1.74706400 |
| C  | -0.95856600 | -1.36375100 | -1.95781900 |
| H  | -1.33821900 | -2.35996300 | -1.74077600 |
| Co | -1.28257200 | -0.93098600 | 0.18331700  |

Zero-point correction= 0.624056 (Hartree/Particle)

Thermal correction to Energy= 0.665178

Thermal correction to Enthalpy= 0.666122

Thermal correction to Gibbs Free Energy= 0.550715

Sum of electronic and zero-point Energies= -2177.238169

Sum of electronic and thermal Energies= -2177.197048

Sum of electronic and thermal Enthalpies= -2177.196104

Sum of electronic and thermal Free Energies= -2177.311510

E(RM06L) = -2177.862226 A.U.

### B-1-Rh

1 1

Number of imaginary frequencies: 0

|   |             |             |             |
|---|-------------|-------------|-------------|
| C | -0.53271500 | -1.83671600 | -1.01326400 |
| C | -1.75520400 | -1.99574000 | -0.24630400 |
| C | -2.70493600 | -1.03341500 | -0.70833500 |
| C | -2.07115800 | -0.26388500 | -1.77527400 |
| C | -0.74740900 | -0.78608000 | -1.97634000 |
| O | -0.83990500 | 0.12142800  | 2.27562100  |
| O | -2.04248000 | 1.58071600  | 1.17791900  |
| C | -1.58506800 | 1.15575100  | 2.29298000  |
| C | -4.10192000 | -0.82500700 | -0.21848800 |
| H | -4.81694500 | -1.20835700 | -0.95550800 |
| H | -4.27775200 | -1.34288700 | 0.72533100  |
| H | -4.30728600 | 0.23755300  | -0.06662100 |
| C | -1.93943800 | -2.99352000 | 0.84933300  |
| H | -2.72619200 | -2.69418400 | 1.54294900  |
| H | -2.21173000 | -3.96537000 | 0.42016600  |
| H | -1.01453000 | -3.12354600 | 1.41569500  |
| C | 0.65680400  | -2.73599900 | -0.91813600 |
| H | 1.01905900  | -2.81324300 | 0.10976000  |
| H | 0.38033200  | -3.74383000 | -1.24979000 |
| H | 1.47369300  | -2.38556600 | -1.54779200 |
| C | 0.24595800  | -0.31563600 | -2.98932800 |

|   |             |             |             |
|---|-------------|-------------|-------------|
| H | 1.27111800  | -0.35689200 | -2.61189000 |
| H | 0.18667100  | -0.95772900 | -3.87639000 |
| H | 0.03688000  | 0.70773100  | -3.30660900 |
| C | -2.73515300 | 0.82617400  | -2.55275100 |
| H | -2.00551800 | 1.50455900  | -2.99853100 |
| H | -3.33198200 | 0.39440500  | -3.36525300 |
| H | -3.40735100 | 1.40909500  | -1.91868600 |
| C | -1.88521100 | 1.87791300  | 3.57290600  |
| H | -1.17198400 | 2.70134300  | 3.69037400  |
| H | -2.88920600 | 2.30480700  | 3.53775000  |
| H | -1.78115000 | 1.20360400  | 4.42398300  |
| C | 2.10044800  | -0.41142500 | 1.73169500  |
| C | 2.63901400  | -1.54085000 | 2.26656800  |
| C | 3.54786400  | -2.31080800 | 1.48170400  |
| C | 3.83598400  | -1.95559300 | 0.19513100  |
| C | 3.22918100  | -0.80568600 | -0.43345200 |
| C | 1.95065900  | 1.23577300  | -0.04648700 |
| C | 0.22385000  | 2.73582000  | -0.43199000 |
| C | 1.10843000  | 3.72225600  | -0.83966200 |
| C | 2.47461700  | 3.43195200  | -0.86321200 |
| C | 2.90049600  | 2.17662200  | -0.44967800 |
| H | 1.41471300  | 0.22969300  | 2.26861500  |
| H | 2.39558200  | -1.81742800 | 3.28457800  |
| H | 4.01178800  | -3.19231700 | 1.91486000  |
| H | 4.51154600  | -2.52760400 | -0.42972000 |
| H | -0.84282600 | 2.91420700  | -0.37806700 |
| H | 0.72954700  | 4.69511500  | -1.13156200 |

|                                              |              |             |                            |
|----------------------------------------------|--------------|-------------|----------------------------|
| H                                            | 3.19673400   | 4.17664300  | -1.18127500                |
| H                                            | 3.94836600   | 1.90619000  | -0.43476800                |
| N                                            | 2.39454300   | -0.03197100 | 0.43564000                 |
| N                                            | 0.63163400   | 1.49635300  | -0.06627200                |
| O                                            | 3.35046000   | -0.47496700 | -1.61377000                |
| Rh                                           | -0.97444400  | 0.03476700  | 0.07219900                 |
| Zero-point correction=                       |              |             | 0.440166(Hartree/Particle) |
| Thermal correction to Energy=                |              |             | 0.469707                   |
| Thermal correction to Enthalpy=              |              |             | 0.470651                   |
| Thermal correction to Gibbs Free Energy=     |              |             | 0.380203                   |
| Sum of electronic and zero-point Energies=   |              |             | -1298.230269               |
| Sum of electronic and thermal Energies=      |              |             | -1298.200728               |
| Sum of electronic and thermal Enthalpies=    |              |             | -1298.199784               |
| Sum of electronic and thermal Free Energies= |              |             | -1298.290232               |
| E(RB3LYP) =                                  | -1298.670435 | A.U.        |                            |

### B-2a-Rh

1 1

Number of imaginary frequencies: 0

|   |             |             |             |
|---|-------------|-------------|-------------|
| C | -1.56190900 | 0.55923400  | -1.91183900 |
| C | -1.87043900 | -0.83976700 | -1.70111200 |
| C | -2.61263900 | -0.92940700 | -0.49175900 |
| C | -2.94326500 | 0.43745600  | -0.05199600 |
| C | -2.33390900 | 1.33909700  | -0.93473800 |
| C | -3.15048200 | -2.16848900 | 0.15429300  |
| H | -4.18932700 | -2.33977200 | -0.15251700 |
| H | -2.57114700 | -3.05222300 | -0.12089000 |
| H | -3.13876800 | -2.07715000 | 1.24328300  |

|   |             |             |             |
|---|-------------|-------------|-------------|
| C | -1.49584200 | -1.95483200 | -2.62441600 |
| H | -1.57761900 | -2.93040500 | -2.14285900 |
| H | -2.17938800 | -1.95156500 | -3.48170600 |
| H | -0.47856300 | -1.84451500 | -3.00382100 |
| C | -0.84667800 | 1.12780800  | -3.09800600 |
| H | -0.08703600 | 0.43753800  | -3.47034500 |
| H | -1.55498900 | 1.32276300  | -3.91245900 |
| H | -0.35521800 | 2.07145900  | -2.85094400 |
| C | -2.41248200 | 2.83340200  | -0.92317900 |
| H | -1.44517300 | 3.28821300  | -1.15186500 |
| H | -3.11890000 | 3.17469000  | -1.68893200 |
| H | -2.75557500 | 3.21875200  | 0.03922300  |
| C | -3.75592700 | 0.73625400  | 1.16796100  |
| H | -3.85105500 | 1.80922300  | 1.34186200  |
| H | -4.76350400 | 0.31756200  | 1.06965600  |
| H | -3.29273100 | 0.28704300  | 2.05275100  |
| N | 2.20997700  | -0.28246500 | -0.45718800 |
| C | 2.10530100  | 1.06112200  | -0.03512000 |
| N | 0.84604800  | 1.43147000  | 0.30046900  |
| C | 0.60555200  | 2.65594800  | 0.80668600  |
| C | 1.60927200  | 3.59460600  | 0.97627800  |
| C | 2.90662900  | 3.23590100  | 0.60270300  |
| H | -0.42378600 | 2.86138000  | 1.07445300  |
| H | 1.37849300  | 4.57126100  | 1.38533900  |
| H | 3.72446600  | 3.94112600  | 0.71022700  |
| C | 3.48343000  | -0.85425800 | -0.86893200 |
| C | 3.46458800  | -2.28901800 | -1.06547300 |

|                                              |              |             |                             |
|----------------------------------------------|--------------|-------------|-----------------------------|
| H                                            | 4.42107200   | -2.72332100 | -1.32973000                 |
| C                                            | 2.33149800   | -3.02497900 | -0.93290500                 |
| C                                            | 1.09050000   | -2.39062600 | -0.60934000                 |
| C                                            | 1.02520900   | -1.03869600 | -0.39680000                 |
| O                                            | 4.47878400   | -0.15981100 | -1.01786100                 |
| H                                            | 2.35559800   | -4.10039400 | -1.08560000                 |
| H                                            | 0.18086200   | -2.97721600 | -0.56631800                 |
| C                                            | 3.16883000   | 1.96798600  | 0.09615900                  |
| H                                            | 4.16028500   | 1.66323100  | -0.19768100                 |
| O                                            | 0.80748900   | -1.99136100 | 2.51086300                  |
| O                                            | -0.67480400  | -0.31990900 | 2.18700200                  |
| C                                            | -0.06844300  | -1.10239200 | 2.93231100                  |
| H                                            | 0.90251500   | -1.95496400 | 1.52976800                  |
| C                                            | -0.27418700  | -1.11234300 | 4.41736700                  |
| H                                            | -1.03716100  | -0.38751900 | 4.69630000                  |
| H                                            | -0.56233900  | -2.11671700 | 4.74038200                  |
| H                                            | 0.67192300   | -0.87259700 | 4.91223200                  |
| Rh                                           | -0.65521100  | 0.02279300  | -0.02292600                 |
| Zero-point correction=                       |              |             | 0.440282 (Hartree/Particle) |
| Thermal correction to Energy=                |              |             | 0.469746                    |
| Thermal correction to Enthalpy=              |              |             | 0.470691                    |
| Thermal correction to Gibbs Free Energy=     |              |             | 0.379925                    |
| Sum of electronic and zero-point Energies=   |              |             | -1298.225360                |
| Sum of electronic and thermal Energies=      |              |             | -1298.195895                |
| Sum of electronic and thermal Enthalpies=    |              |             | -1298.194951                |
| Sum of electronic and thermal Free Energies= |              |             | -1298.285717                |
| E(RB3LYP) =                                  | -1298.665642 | A.U.        |                             |

**B-3a-Rh**

1 1

Number of imaginary frequencies: 0

|   |            |             |             |
|---|------------|-------------|-------------|
| C | 1.96565300 | 0.00171500  | 1.39993900  |
| C | 2.13113800 | -1.28282200 | 0.73078100  |
| C | 2.55875600 | -1.00450500 | -0.58794400 |
| C | 2.81714900 | 0.44839700  | -0.69975900 |
| C | 2.49688300 | 1.04855700  | 0.52339800  |
| C | 2.85264400 | -1.98976600 | -1.67334200 |
| H | 3.93300600 | -2.17180200 | -1.73129300 |
| H | 2.35885500 | -2.94655600 | -1.49659000 |
| H | 2.53048600 | -1.61492800 | -2.64813600 |
| C | 1.94319500 | -2.61841700 | 1.38020000  |
| H | 1.92360900 | -3.42740600 | 0.64831400  |
| H | 2.78120300 | -2.81181900 | 2.05987200  |
| H | 1.02067100 | -2.66013300 | 1.96270600  |
| C | 1.57471600 | 0.18825000  | 2.82794700  |
| H | 0.89275600 | -0.59635300 | 3.16045700  |
| H | 2.47121200 | 0.14735100  | 3.46088800  |
| H | 1.09741000 | 1.15679400  | 2.99043200  |
| C | 2.64325100 | 2.48625900  | 0.91403000  |
| H | 1.78500300 | 2.83564500  | 1.49424400  |
| H | 3.53266900 | 2.61494200  | 1.54174600  |
| H | 2.75928900 | 3.13629000  | 0.04417900  |
| C | 3.34829600 | 1.10189400  | -1.93440100 |
| H | 3.27338000 | 2.18936500  | -1.88679100 |
| H | 4.40523200 | 0.84238500  | -2.07138800 |

|                                            |             |             |                             |
|--------------------------------------------|-------------|-------------|-----------------------------|
| H                                          | 2.81400300  | 0.75952500  | -2.82538700                 |
| N                                          | -2.27802800 | -0.48811700 | -0.04448700                 |
| C                                          | -2.19977400 | 0.91600900  | -0.08063300                 |
| N                                          | -0.93340900 | 1.39206900  | -0.22598100                 |
| C                                          | -0.71564300 | 2.72333400  | -0.31821700                 |
| C                                          | -1.74075800 | 3.64760100  | -0.26236100                 |
| C                                          | -3.04394900 | 3.16746300  | -0.09434700                 |
| H                                          | 0.31714300  | 3.02305600  | -0.44366500                 |
| H                                          | -1.52570700 | 4.70640900  | -0.34547300                 |
| H                                          | -3.87990000 | 3.85713400  | -0.03666500                 |
| C                                          | -3.54940300 | -1.18167900 | 0.02558000                  |
| C                                          | -3.46399200 | -2.62310800 | -0.12777000                 |
| H                                          | -4.41816700 | -3.13585100 | -0.10757400                 |
| C                                          | -2.28007200 | -3.27076400 | -0.27888100                 |
| C                                          | -1.05649400 | -2.53526400 | -0.26559000                 |
| C                                          | -1.05029000 | -1.17105000 | -0.15331300                 |
| O                                          | -4.60537000 | -0.58786400 | 0.19063200                  |
| H                                          | -2.25556600 | -4.35054300 | -0.39479000                 |
| H                                          | -0.11590800 | -3.06272200 | -0.34987800                 |
| C                                          | -3.28555300 | 1.80297200  | -0.00089100                 |
| H                                          | -4.27924400 | 1.40579500  | 0.12959000                  |
| Rh                                         | 0.58282300  | -0.01448400 | -0.23851400                 |
| Zero-point correction=                     |             |             | 0.376349 (Hartree/Particle) |
| Thermal correction to Energy=              |             |             | 0.400113                    |
| Thermal correction to Enthalpy=            |             |             | 0.401057                    |
| Thermal correction to Gibbs Free Energy=   |             |             | 0.323658                    |
| Sum of electronic and zero-point Energies= |             |             | -1069.155076                |

Sum of electronic and thermal Energies= -1069.131312  
Sum of electronic and thermal Enthalpies= -1069.130368  
Sum of electronic and thermal Free Energies= -1069.207767  
E(RB3LYP) = -1069.531425 A.U.

**B-4-Rh**

1 1

Number of imaginary frequencies: 0

|   |             |             |             |
|---|-------------|-------------|-------------|
| C | 3.41415800  | 0.75438600  | -1.37180000 |
| C | 4.36313800  | 1.36647400  | -0.50376400 |
| C | 5.41531400  | 0.61027600  | 0.05003900  |
| C | 4.22559300  | 2.72645200  | -0.15799600 |
| C | 6.30391900  | 1.20615500  | 0.94177000  |
| H | 5.53142000  | -0.43141100 | -0.23141100 |
| C | 5.12141000  | 3.31094700  | 0.73352100  |
| H | 3.42158800  | 3.30851500  | -0.59703100 |
| C | 6.15789100  | 2.55266700  | 1.28696700  |
| H | 7.11513200  | 0.62139100  | 1.36367600  |
| H | 5.01829800  | 4.36064900  | 0.99084500  |
| H | 6.85532500  | 3.01284000  | 1.97983300  |
| C | 2.56117100  | 0.22529200  | -2.06133500 |
| P | 1.27617700  | -0.56184900 | -2.97109600 |
| C | -1.15878900 | 0.45588500  | -1.92985600 |
| C | -2.28856400 | 1.29239800  | -1.87647700 |
| C | -2.15448100 | 2.60561500  | -1.36589600 |
| C | -3.55740700 | 0.81363500  | -2.26944800 |
| C | -3.27767200 | 3.40926900  | -1.22891600 |
| H | -1.17503900 | 2.96105600  | -1.06401700 |

|   |             |             |             |
|---|-------------|-------------|-------------|
| C | -4.67182900 | 1.63221600  | -2.13101800 |
| H | -3.64926700 | -0.19614900 | -2.65251000 |
| C | -4.53444200 | 2.92163700  | -1.60625800 |
| H | -3.18358100 | 4.40764900  | -0.81602200 |
| H | -5.65091500 | 1.26497600  | -2.41965300 |
| H | -5.41163600 | 3.54893900  | -1.48388300 |
| C | -0.13102300 | -0.24496200 | -1.89262900 |
| C | 1.00187000  | 0.50134000  | -4.42083200 |
| H | 0.12423700  | 0.13363700  | -4.95853400 |
| H | 0.84814900  | 1.54026200  | -4.11961800 |
| H | 1.87719900  | 0.42894000  | -5.07120400 |
| O | 1.49194900  | -2.00771000 | -3.29338900 |
| C | -0.49072500 | -3.16748100 | 1.15578800  |
| C | 0.32726000  | -3.28144300 | -0.00023100 |
| C | 1.60696800  | -2.60834900 | 0.27374200  |
| C | 1.50358900  | -1.97774300 | 1.51861100  |
| C | 0.16181000  | -2.23834500 | 2.05453900  |
| C | -0.30306000 | -1.87664200 | 3.43219900  |
| H | -1.39334700 | -1.86611100 | 3.49065100  |
| H | 0.06902700  | -2.60280700 | 4.16531100  |
| H | 0.06083100  | -0.88974000 | 3.72805000  |
| C | -1.73534300 | -3.93905700 | 1.45854500  |
| H | -2.21714500 | -4.31067500 | 0.55261300  |
| H | -1.46759300 | -4.81084700 | 2.06811600  |
| H | -2.46152700 | -3.34699300 | 2.01677200  |
| C | 0.06476000  | -4.12546200 | -1.20700000 |
| H | 0.44634500  | -3.64172900 | -2.10889700 |

|   |             |             |             |
|---|-------------|-------------|-------------|
| H | 0.57257500  | -5.09267200 | -1.10065900 |
| H | -1.00206700 | -4.32122800 | -1.33406900 |
| C | 2.85031400  | -2.77348200 | -0.54022300 |
| H | 3.54873500  | -1.95110100 | -0.38103200 |
| H | 3.34835400  | -3.70157700 | -0.23003200 |
| H | 2.63630100  | -2.84165200 | -1.60643200 |
| C | 2.57147100  | -1.20975300 | 2.23208500  |
| H | 3.10162700  | -1.86980100 | 2.92970400  |
| H | 3.30979000  | -0.79602500 | 1.54158500  |
| H | 2.15359500  | -0.38822300 | 2.81891000  |
| C | -2.23084000 | -0.62572700 | 0.60701300  |
| C | -3.29388800 | -1.40410500 | 0.24729700  |
| C | -4.62545400 | -0.99836800 | 0.54435700  |
| C | -4.86964600 | 0.19695500  | 1.14733000  |
| C | -3.81034800 | 1.11328800  | 1.48929900  |
| C | -1.33099100 | 1.40673200  | 1.47858900  |
| C | 0.98296400  | 1.54919900  | 1.10975600  |
| C | 1.06141400  | 2.79398700  | 1.71134800  |
| C | -0.11304000 | 3.33836700  | 2.23782000  |
| C | -1.31823300 | 2.65520700  | 2.12368000  |
| H | -3.11396100 | -2.33871300 | -0.26642300 |
| H | -5.45233000 | -1.65047900 | 0.27473000  |
| H | -5.86801700 | 0.54885600  | 1.37591300  |
| H | 1.84925900  | 1.06052500  | 0.68609000  |
| H | 2.01668600  | 3.30232000  | 1.77001600  |
| H | -0.09787400 | 4.30215300  | 2.73688600  |
| H | -2.24470400 | 3.05837400  | 2.49874400  |

|                                              |              |             |                            |
|----------------------------------------------|--------------|-------------|----------------------------|
| N                                            | -2.46750300  | 0.60974200  | 1.23604000                 |
| N                                            | -0.17626100  | 0.87174100  | 1.01299200                 |
| O                                            | -3.99731000  | 2.23659600  | 1.94608000                 |
| Rh                                           | -0.28676300  | -1.07537000 | 0.29846600                 |
| Zero-point correction=                       |              |             | 0.624592(Hartree/Particle) |
| Thermal correction to Energy=                |              |             | 0.666917                   |
| Thermal correction to Enthalpy=              |              |             | 0.667861                   |
| Thermal correction to Gibbs Free Energy=     |              |             | 0.549394                   |
| Sum of electronic and zero-point Energies=   |              |             | -2141.123774               |
| Sum of electronic and thermal Energies=      |              |             | -2141.081449               |
| Sum of electronic and thermal Enthalpies=    |              |             | -2141.080504               |
| Sum of electronic and thermal Free Energies= |              |             | -2141.198972               |
| E(RB3LYP) =                                  | -2141.748366 | A.U.        |                            |

### B-5a-Rh

1 1

Number of imaginary frequencies: 0

|   |             |             |             |
|---|-------------|-------------|-------------|
| C | -3.18451800 | -0.66745800 | 1.27507700  |
| C | -4.31381000 | -1.21917700 | 0.60705400  |
| C | -5.04395200 | -0.44306300 | -0.31390600 |
| C | -4.67204000 | -2.56561800 | 0.81890700  |
| C | -6.10240800 | -1.01209100 | -1.01774300 |
| H | -4.77338400 | 0.59704800  | -0.45912300 |
| C | -5.73180300 | -3.12433400 | 0.10893500  |
| H | -4.11651600 | -3.15557500 | 1.54093700  |
| C | -6.44527300 | -2.35205400 | -0.81302100 |
| H | -6.66518300 | -0.40967800 | -1.72434800 |
| H | -6.00680400 | -4.16084200 | 0.27832500  |

|   |             |             |             |
|---|-------------|-------------|-------------|
| H | -7.27199700 | -2.79082200 | -1.36311800 |
| C | -2.19055400 | -0.21345800 | 1.81288100  |
| P | -0.59545700 | 0.27111700  | 2.38512400  |
| C | -0.30592400 | 1.60486300  | -0.12086400 |
| C | -1.44329100 | 2.55614800  | 0.01642600  |
| C | -2.59039400 | 2.39008500  | -0.77685000 |
| C | -1.37395400 | 3.64934300  | 0.89008600  |
| C | -3.66013100 | 3.27529900  | -0.66633600 |
| H | -2.64337300 | 1.55269800  | -1.46713600 |
| C | -2.44492100 | 4.54008000  | 0.99736400  |
| H | -0.47196400 | 3.80422500  | 1.47404600  |
| C | -3.59181300 | 4.35048000  | 0.22571900  |
| H | -4.54609800 | 3.13308000  | -1.27842400 |
| H | -2.37815900 | 5.38472400  | 1.67627200  |
| H | -4.42416600 | 5.04230500  | 0.30828200  |
| C | 0.21080000  | 0.78769500  | 0.83061900  |
| C | -0.87133400 | 1.66439400  | 3.52584000  |
| H | 0.08151100  | 2.16440900  | 3.71989600  |
| H | -1.59082300 | 2.37803200  | 3.12409000  |
| H | -1.24733000 | 1.24352100  | 4.46232100  |
| O | 0.15619300  | -0.86258000 | 3.03431900  |
| C | 0.76561900  | 2.65595900  | -2.14668000 |
| C | 0.33695300  | 1.55786600  | -1.46114300 |
| H | 0.53293900  | 3.63748500  | -1.75219600 |
| C | -0.17894200 | -0.86045600 | -1.62485700 |
| C | -2.06038300 | -2.29246500 | -1.88026300 |
| C | -1.60743500 | -3.01751800 | -0.77861500 |

|   |             |             |             |
|---|-------------|-------------|-------------|
| C | -0.44320400 | -2.61177900 | -0.12949900 |
| N | 0.25380700  | -1.55522200 | -0.56811700 |
| H | -2.98218500 | -2.57263000 | -2.37856100 |
| H | -2.16690900 | -3.86534800 | -0.40248300 |
| H | -0.07032000 | -3.09397000 | 0.76643400  |
| N | 0.65798400  | 0.27300000  | -1.96000900 |
| C | 3.74023100  | 0.62780900  | 0.62373100  |
| C | 3.28920400  | 0.01919400  | 1.82830700  |
| C | 3.17083000  | -1.40926300 | 1.56849600  |
| C | 3.71021900  | -1.68160300 | 0.23926400  |
| C | 4.04165800  | -0.44529000 | -0.34261900 |
| C | 4.57726300  | -0.23222900 | -1.72128400 |
| H | 4.38320200  | 0.78256400  | -2.07377400 |
| H | 5.66336200  | -0.38482900 | -1.72349700 |
| H | 4.13238300  | -0.92990500 | -2.43496500 |
| C | 4.00578900  | 2.08258600  | 0.39106000  |
| H | 3.49147900  | 2.70032900  | 1.12918100  |
| H | 5.07966500  | 2.29368600  | 0.45820700  |
| H | 3.66700900  | 2.39268600  | -0.60153500 |
| C | 3.01597900  | 0.68022800  | 3.14022800  |
| H | 2.20308000  | 0.17314700  | 3.66154900  |
| H | 3.91692600  | 0.63734800  | 3.76446700  |
| H | 2.75058200  | 1.73174100  | 3.00999600  |
| C | 2.76740700  | -2.43508600 | 2.57240000  |
| H | 2.55533700  | -3.39519500 | 2.09748300  |
| H | 3.59154500  | -2.58919500 | 3.28118200  |
| H | 1.88352700  | -2.10266200 | 3.11915700  |

|                                              |              |             |                             |
|----------------------------------------------|--------------|-------------|-----------------------------|
| C                                            | 3.82315000   | -3.03135400 | -0.39912600                 |
| H                                            | 4.76018000   | -3.51934600 | -0.10654900                 |
| H                                            | 3.00184400   | -3.68383700 | -0.09305900                 |
| H                                            | 3.80255200   | -2.95703600 | -1.48817500                 |
| C                                            | -1.32991400  | -1.18566200 | -2.32277600                 |
| H                                            | -1.63778900  | -0.59293100 | -3.17615400                 |
| C                                            | 1.51803400   | 0.05870200  | -3.10790500                 |
| C                                            | 1.96031600   | 1.27230500  | -3.75733200                 |
| H                                            | 2.58419300   | 1.13770900  | -4.63295700                 |
| C                                            | 1.57140300   | 2.50322300  | -3.31481700                 |
| H                                            | 1.90219700   | 3.39299200  | -3.84307700                 |
| O                                            | 1.78919700   | -1.08811300 | -3.43719700                 |
| Rh                                           | 1.83294500   | -0.36265300 | 0.21355100                  |
| Zero-point correction=                       |              |             | 0.625010 (Hartree/Particle) |
| Thermal correction to Energy=                |              |             | 0.667166                    |
| Thermal correction to Enthalpy=              |              |             | 0.668111                    |
| Thermal correction to Gibbs Free Energy=     |              |             | 0.548903                    |
| Sum of electronic and zero-point Energies=   |              |             | -2141.140949                |
| Sum of electronic and thermal Energies=      |              |             | -2141.098793                |
| Sum of electronic and thermal Enthalpies=    |              |             | -2141.097849                |
| Sum of electronic and thermal Free Energies= |              |             | -2141.217056                |
| E(RB3LYP) =                                  | -2141.765960 | A.U.        |                             |

### B-6-Rh

1 1

Number of imaginary frequencies: 0

|   |             |            |             |
|---|-------------|------------|-------------|
| C | -2.70512100 | 0.12432100 | -0.49602700 |
| C | -4.17443500 | 0.25663100 | -0.41579100 |

|   |             |             |             |
|---|-------------|-------------|-------------|
| C | -4.82314400 | 1.48484200  | -0.64715200 |
| C | -4.96745600 | -0.85392100 | -0.05953700 |
| C | -6.20193900 | 1.60240900  | -0.50956600 |
| H | -4.24618800 | 2.34590200  | -0.95848500 |
| C | -6.34791800 | -0.73352900 | 0.08238400  |
| H | -4.50119900 | -1.81984800 | 0.10779000  |
| C | -6.97164800 | 0.49547200  | -0.13961200 |
| H | -6.67972400 | 2.55846500  | -0.69952400 |
| H | -6.93640400 | -1.60071400 | 0.36586400  |
| H | -8.04778600 | 0.58960900  | -0.03371500 |
| C | -1.86252900 | 1.17914200  | -0.33670500 |
| P | -1.65681700 | 2.94732600  | -0.10790300 |
| C | 0.83475900  | 1.33209700  | -0.19211600 |
| C | 1.76594200  | 2.47567900  | -0.11137800 |
| C | 1.92901400  | 3.33426300  | -1.21208100 |
| C | 2.48372800  | 2.74606700  | 1.06524200  |
| C | 2.81108100  | 4.41354300  | -1.14677200 |
| H | 1.36939900  | 3.13670300  | -2.12180900 |
| C | 3.35364600  | 3.83358000  | 1.13481100  |
| H | 2.33351300  | 2.11502600  | 1.93501500  |
| C | 3.52982700  | 4.66403700  | 0.02402100  |
| H | 2.93470600  | 5.06099500  | -2.00980500 |
| H | 3.88755800  | 4.03945300  | 2.05781500  |
| H | 4.21241200  | 5.50629100  | 0.07601400  |
| C | -0.48373600 | 1.61325200  | -0.34271400 |
| C | -1.98357600 | 3.87527400  | -1.64350300 |
| H | -1.26281400 | 4.69484700  | -1.70628900 |

|   |             |             |             |
|---|-------------|-------------|-------------|
| H | -1.88099300 | 3.22203700  | -2.51268000 |
| H | -2.98986100 | 4.30034200  | -1.60930100 |
| O | -1.86423500 | 3.69800400  | 1.17096300  |
| C | 2.63688300  | -2.50130100 | -0.89235900 |
| C | 2.86571100  | -1.27483100 | -1.68267800 |
| C | 3.55752100  | -0.33407900 | -0.87679600 |
| C | 3.54598500  | -0.87161900 | 0.47303900  |
| C | 3.04019500  | -2.25459500 | 0.41896200  |
| C | 2.96542500  | -3.18203000 | 1.58970300  |
| H | 2.17695800  | -3.92200500 | 1.45541100  |
| H | 3.92429300  | -3.69565300 | 1.72947200  |
| H | 2.74914800  | -2.63361400 | 2.51023000  |
| C | 2.09501000  | -3.76974700 | -1.45963700 |
| H | 1.28767600  | -3.57484900 | -2.17003000 |
| H | 2.88859100  | -4.29529900 | -2.00561900 |
| H | 1.71006700  | -4.42464500 | -0.67859500 |
| C | 2.57915400  | -1.15676400 | -3.14538100 |
| H | 2.59716100  | -0.11660700 | -3.47475100 |
| H | 3.33085900  | -1.71063700 | -3.72166900 |
| H | 1.60154000  | -1.58038800 | -3.39153900 |
| C | 4.26265300  | 0.89930200  | -1.33971400 |
| H | 4.35122300  | 1.64533100  | -0.55054000 |
| H | 5.27337600  | 0.62492300  | -1.66646600 |
| H | 3.75133700  | 1.36783100  | -2.18131200 |
| C | 4.23913600  | -0.27275500 | 1.65161700  |
| H | 5.26933100  | -0.65061400 | 1.69237900  |
| H | 4.28058000  | 0.81441400  | 1.58503200  |

|                                            |             |             |                             |
|--------------------------------------------|-------------|-------------|-----------------------------|
| H                                          | 3.75630900  | -0.55579700 | 2.59008000                  |
| Rh                                         | 1.48652900  | -0.57332500 | -0.08285300                 |
| C                                          | -2.17050700 | -1.22574000 | -0.80204900                 |
| C                                          | -1.06786100 | -1.26306100 | 1.39387100                  |
| C                                          | -1.75558500 | -0.74949600 | 3.62647500                  |
| C                                          | -0.48348100 | -0.22130000 | 3.84958700                  |
| C                                          | 0.43769000  | -0.23240000 | 2.81027200                  |
| N                                          | 0.14844700  | -0.73937400 | 1.59722400                  |
| H                                          | -2.50428600 | -0.74366300 | 4.41138400                  |
| H                                          | -0.20874200 | 0.20601300  | 4.80699800                  |
| H                                          | 1.43014700  | 0.18436600  | 2.92860000                  |
| N                                          | -1.30551900 | -1.83948300 | 0.10054700                  |
| C                                          | -2.52177800 | -1.89390700 | -1.94660300                 |
| H                                          | -3.19254900 | -1.41077000 | -2.64523900                 |
| C                                          | -0.82242000 | -3.18765600 | -0.05051800                 |
| C                                          | -1.24150200 | -3.83891400 | -1.26613700                 |
| H                                          | -0.90454200 | -4.86008800 | -1.39583800                 |
| C                                          | -2.04779800 | -3.21212300 | -2.17441900                 |
| H                                          | -2.35344100 | -3.73460200 | -3.07643300                 |
| O                                          | -0.11506500 | -3.67136900 | 0.83087000                  |
| C                                          | -2.05001500 | -1.29006800 | 2.37805100                  |
| H                                          | -3.02079300 | -1.71450500 | 2.15268100                  |
| Zero-point correction=                     |             |             | 0.626281 (Hartree/Particle) |
| Thermal correction to Energy=              |             |             | 0.667500                    |
| Thermal correction to Enthalpy=            |             |             | 0.668444                    |
| Thermal correction to Gibbs Free Energy=   |             |             | 0.552792                    |
| Sum of electronic and zero-point Energies= |             |             | -2141.124691                |

Sum of electronic and thermal Energies= -2141.083472  
 Sum of electronic and thermal Enthalpies= -2141.082528  
 Sum of electronic and thermal Free Energies= -2141.198179  
 E(RB3LYP) = -2141.750972 A.U.

**B-7-Rh**

1 1

Number of imaginary frequencies: 0

|   |             |             |             |
|---|-------------|-------------|-------------|
| C | -2.35728300 | 0.03973300  | -1.01939500 |
| C | -3.68049800 | 0.45238100  | -0.93566800 |
| C | -3.86722700 | 1.94073000  | -0.70720700 |
| C | -4.83135400 | -0.39670600 | -0.90623200 |
| C | -5.16797000 | 2.33225800  | -0.08679900 |
| H | -3.77725400 | 2.46280100  | -1.67623700 |
| C | -6.02373500 | 0.08007700  | -0.44124300 |
| H | -4.72535700 | -1.43927200 | -1.18735400 |
| C | -6.17858400 | 1.44476400  | 0.01946000  |
| H | -5.29655700 | 3.36548000  | 0.22180300  |
| H | -6.87800400 | -0.58744100 | -0.37896900 |
| H | -7.13352500 | 1.74834700  | 0.43651200  |
| C | -1.39084200 | 1.04788800  | -0.67996800 |
| P | -2.27750900 | 2.41581200  | 0.17760800  |
| C | 1.10835600  | 1.46323800  | -0.20002700 |
| C | 1.91920000  | 2.65784500  | -0.30325500 |
| C | 1.81332700  | 3.51449400  | -1.41707300 |
| C | 2.80469100  | 2.99091700  | 0.73732600  |
| C | 2.59309300  | 4.66568400  | -1.49068800 |
| H | 1.13003600  | 3.25620300  | -2.22045400 |

|   |             |             |             |
|---|-------------|-------------|-------------|
| C | 3.56057100  | 4.15880700  | 0.67224300  |
| H | 2.87218400  | 2.33207500  | 1.59677500  |
| C | 3.46428200  | 4.99231600  | -0.44583500 |
| H | 2.51958300  | 5.31285000  | -2.35927300 |
| H | 4.22842100  | 4.41766800  | 1.48802800  |
| H | 4.06397300  | 5.89535100  | -0.50269100 |
| C | -0.03776000 | 1.00837600  | -0.65642800 |
| C | -1.69306600 | 4.00470100  | -0.49402800 |
| H | -0.66288400 | 4.16266500  | -0.16618600 |
| H | -1.72877000 | 4.01244300  | -1.58645700 |
| H | -2.31384200 | 4.81239400  | -0.09719700 |
| O | -2.27896700 | 2.33273200  | 1.67489400  |
| C | 2.45752300  | -2.52004600 | -0.60225700 |
| C | 2.89664700  | -1.42189800 | -1.41520400 |
| C | 3.61582000  | -0.48389100 | -0.58277600 |
| C | 3.56145900  | -0.97458600 | 0.76656500  |
| C | 2.79543200  | -2.20593300 | 0.75119400  |
| C | 2.49214600  | -3.06137400 | 1.94184700  |
| H | 1.51214200  | -3.53292300 | 1.84148300  |
| H | 3.24964200  | -3.84854400 | 2.03988300  |
| H | 2.50196600  | -2.47690300 | 2.86469500  |
| C | 1.90458300  | -3.81085300 | -1.11458700 |
| H | 1.20734600  | -3.65491900 | -1.94026500 |
| H | 2.72738000  | -4.43194900 | -1.49221500 |
| H | 1.38931800  | -4.36728700 | -0.33237600 |
| C | 2.74552000  | -1.33233900 | -2.90041600 |
| H | 2.78026000  | -0.29760900 | -3.24673800 |

|    |             |             |             |
|----|-------------|-------------|-------------|
| H  | 3.55964800  | -1.87880100 | -3.39338400 |
| H  | 1.80202200  | -1.77530800 | -3.22799500 |
| C  | 4.43126000  | 0.66311300  | -1.09462600 |
| H  | 4.66290700  | 1.38381400  | -0.31074900 |
| H  | 5.37703600  | 0.28623700  | -1.50170500 |
| H  | 3.91450300  | 1.20210400  | -1.89161100 |
| C  | 4.25650600  | -0.39927500 | 1.96059300  |
| H  | 5.18985600  | -0.94295800 | 2.15402100  |
| H  | 4.50915100  | 0.65177700  | 1.81187100  |
| H  | 3.64265400  | -0.48140000 | 2.86144100  |
| Rh | 1.47682200  | -0.49037000 | 0.06959700  |
| C  | -1.98966900 | -1.37996100 | -1.19722200 |
| C  | -1.32186000 | -1.37385400 | 1.17191700  |
| C  | -2.30330000 | -0.72238900 | 3.25861700  |
| C  | -1.08458000 | -0.14281700 | 3.60066600  |
| C  | -0.03553300 | -0.20600800 | 2.69279100  |
| N  | -0.14780400 | -0.80086300 | 1.48844900  |
| H  | -3.15026400 | -0.67680000 | 3.93448000  |
| H  | -0.94668400 | 0.37118000  | 4.54454800  |
| H  | 0.92371100  | 0.24853800  | 2.90825300  |
| N  | -1.43773100 | -2.03327500 | -0.09922700 |
| C  | -2.22305800 | -2.08062600 | -2.34860100 |
| H  | -2.64247600 | -1.56260900 | -3.20164200 |
| C  | -1.11043800 | -3.42032300 | -0.08536700 |
| C  | -1.41103200 | -4.11960700 | -1.31489100 |
| H  | -1.19427400 | -5.18109100 | -1.31841200 |
| C  | -1.93565100 | -3.47455400 | -2.39646700 |

|                                              |              |             |                             |
|----------------------------------------------|--------------|-------------|-----------------------------|
| H                                            | -2.14649500  | -4.02732400 | -3.30753700                 |
| O                                            | -0.61855200  | -3.91697400 | 0.92761400                  |
| C                                            | -2.41764700  | -1.36050800 | 2.02704500                  |
| H                                            | -3.33881300  | -1.83507200 | 1.71104000                  |
| Zero-point correction=                       |              |             | 0.626018 (Hartree/Particle) |
| Thermal correction to Energy=                |              |             | 0.666925                    |
| Thermal correction to Enthalpy=              |              |             | 0.667869                    |
| Thermal correction to Gibbs Free Energy=     |              |             | 0.553511                    |
| Sum of electronic and zero-point Energies=   |              |             | -2141.138429                |
| Sum of electronic and thermal Energies=      |              |             | -2141.097522                |
| Sum of electronic and thermal Enthalpies=    |              |             | -2141.096578                |
| Sum of electronic and thermal Free Energies= |              |             | -2141.210937                |
| E(RB3LYP) =                                  | -2141.764447 | A.U.        |                             |

### B-8-Rh

1 1

Number of imaginary frequencies: 0

|   |             |            |             |
|---|-------------|------------|-------------|
| C | -2.34813300 | 0.01307900 | -0.15027600 |
| C | -3.70366900 | 0.60953300 | -0.32860900 |
| C | -4.06484900 | 1.21396500 | -1.54170800 |
| C | -4.62085000 | 0.60172500 | 0.73438400  |
| C | -5.31630100 | 1.81490600 | -1.68736300 |
| H | -3.36736400 | 1.19141400 | -2.37412100 |
| C | -5.86461800 | 1.21094700 | 0.58983300  |
| H | -4.33694000 | 0.14148700 | 1.67565400  |
| C | -6.21523600 | 1.81856700 | -0.61990100 |
| H | -5.59027700 | 2.27210100 | -2.63345900 |
| H | -6.56049000 | 1.21856000 | 1.42306900  |

|   |             |             |             |
|---|-------------|-------------|-------------|
| H | -7.18729100 | 2.28931100  | -0.72954800 |
| C | -1.28771000 | 0.84493700  | -0.32637600 |
| P | -1.20800900 | 2.69217300  | -0.26804800 |
| C | 0.52196900  | 2.13254500  | -0.03915800 |
| C | 1.75686800  | 2.82287400  | 0.27409300  |
| C | 2.91852900  | 2.13899300  | 0.69031100  |
| C | 1.81752900  | 4.22926600  | 0.18901200  |
| C | 4.09486700  | 2.82004600  | 0.98350100  |
| H | 2.88971500  | 1.05473000  | 0.79524700  |
| C | 2.99461100  | 4.91319500  | 0.48205300  |
| H | 0.93069200  | 4.78594400  | -0.09825800 |
| C | 4.13852700  | 4.21402600  | 0.87629600  |
| H | 4.97588500  | 2.27126000  | 1.30467700  |
| H | 3.01873600  | 5.99591800  | 0.40886600  |
| H | 5.05350200  | 4.74984200  | 1.10825800  |
| C | 0.16550400  | 0.80632800  | -0.16359500 |
| C | -1.37237700 | 3.40981400  | -1.94314600 |
| H | -0.88835800 | 4.38990600  | -1.95874300 |
| H | -0.91302500 | 2.76182300  | -2.69391000 |
| H | -2.43436400 | 3.53937500  | -2.16070500 |
| O | -1.91408500 | 3.46062500  | 0.80351600  |
| C | 2.86720300  | -0.65715800 | -1.75487000 |
| C | 3.33880300  | -1.83162000 | -0.98248800 |
| C | 2.31291500  | -2.77287500 | -0.94760900 |
| C | 1.15966200  | -2.19655000 | -1.66851300 |
| C | 1.56225800  | -0.94023800 | -2.26224300 |
| C | 0.76973400  | -0.13310800 | -3.24235900 |

|    |             |             |             |
|----|-------------|-------------|-------------|
| H  | 1.06552000  | 0.91703600  | -3.21978500 |
| H  | 0.93216800  | -0.51333600 | -4.25764000 |
| H  | -0.29880700 | -0.18789500 | -3.02325000 |
| C  | 3.71734000  | 0.51458200  | -2.12151400 |
| H  | 4.43247900  | 0.76049200  | -1.33581900 |
| H  | 4.28330700  | 0.27652100  | -3.03157200 |
| H  | 3.11507900  | 1.40332000  | -2.31597800 |
| C  | 4.69431300  | -1.91556000 | -0.35690400 |
| H  | 4.77165100  | -2.75596700 | 0.33427300  |
| H  | 5.46131800  | -2.04061500 | -1.13052100 |
| H  | 4.93580700  | -0.99838400 | 0.18897600  |
| C  | 2.29582900  | -4.11639400 | -0.29157600 |
| H  | 1.41259600  | -4.24659500 | 0.34256100  |
| H  | 2.27053900  | -4.90304700 | -1.05503300 |
| H  | 3.18282100  | -4.27712400 | 0.32339500  |
| C  | -0.10049800 | -2.92671800 | -1.98029100 |
| H  | 0.01980500  | -3.43826300 | -2.94484600 |
| H  | -0.33003400 | -3.68407100 | -1.23180900 |
| H  | -0.95103500 | -2.24871100 | -2.06670400 |
| Rh | 1.43052400  | -0.73357100 | -0.09763600 |
| C  | -2.34228200 | -1.42931000 | 0.20007400  |
| C  | -0.55684200 | -1.17740200 | 1.85710200  |
| C  | 1.56987600  | -0.48619400 | 2.77851900  |
| C  | 0.94527500  | 0.66883900  | 3.23176300  |
| C  | -0.44223900 | 0.77606500  | 3.05513200  |
| N  | -1.17232100 | -0.13294200 | 2.40477900  |
| H  | 2.61684000  | -0.67535000 | 2.99465500  |

|                                              |              |             |                             |
|----------------------------------------------|--------------|-------------|-----------------------------|
| H                                            | 1.49368500   | 1.44377500  | 3.75439000                  |
| H                                            | -0.99196900  | 1.62054800  | 3.46160300                  |
| N                                            | -1.38450500  | -2.01458600 | 1.04363600                  |
| C                                            | -3.29768000  | -2.24142700 | -0.36637000                 |
| H                                            | -4.03388100  | -1.79177100 | -1.01861500                 |
| C                                            | -1.28641600  | -3.43888100 | 1.23614500                  |
| C                                            | -2.34167600  | -4.21712600 | 0.63806600                  |
| H                                            | -2.30448300  | -5.28108500 | 0.83839100                  |
| C                                            | -3.31128100  | -3.63782500 | -0.12529600                 |
| H                                            | -4.09298700  | -4.24571800 | -0.57110800                 |
| O                                            | -0.35157500  | -3.92422800 | 1.87691900                  |
| C                                            | 0.82810000   | -1.45151300 | 2.05506100                  |
| H                                            | 1.20644900   | -2.45182300 | 1.90230100                  |
| Zero-point correction=                       |              |             | 0.625794 (Hartree/Particle) |
| Thermal correction to Energy=                |              |             | 0.666791                    |
| Thermal correction to Enthalpy=              |              |             | 0.667735                    |
| Thermal correction to Gibbs Free Energy=     |              |             | 0.552265                    |
| Sum of electronic and zero-point Energies=   |              |             | -2141.136682                |
| Sum of electronic and thermal Energies=      |              |             | -2141.095685                |
| Sum of electronic and thermal Enthalpies=    |              |             | -2141.094741                |
| Sum of electronic and thermal Free Energies= |              |             | -2141.210211                |
| E(RB3LYP) =                                  | -2141.762476 | A.U.        |                             |

### **B-TS<sub>a</sub>1-Co**

1 1

Number of imaginary frequencies: 1

|   |             |             |             |
|---|-------------|-------------|-------------|
| C | -0.46145300 | -1.48721700 | -1.53159200 |
| C | -1.42333200 | -2.02431000 | -0.59059800 |

|    |             |             |             |
|----|-------------|-------------|-------------|
| C  | -2.51240100 | -1.11963200 | -0.51433300 |
| C  | -2.25312400 | -0.01766100 | -1.41339500 |
| C  | -1.01493100 | -0.28737800 | -2.08006100 |
| O  | -0.07936700 | 0.88982100  | 2.76828700  |
| O  | -1.78420700 | 0.87768600  | 1.31689000  |
| C  | -1.24927200 | 1.22099900  | 2.42567000  |
| C  | -3.71104200 | -1.24004400 | 0.34995000  |
| H  | -4.57524000 | -1.55032600 | -0.24814700 |
| H  | -3.57461900 | -1.97978900 | 1.14098900  |
| H  | -3.95872700 | -0.28247900 | 0.81436700  |
| C  | -1.34427000 | -3.34475400 | 0.08716100  |
| H  | -1.71300000 | -3.30931800 | 1.11561200  |
| H  | -1.97143400 | -4.06585200 | -0.44958700 |
| H  | -0.32764300 | -3.74125100 | 0.10022500  |
| C  | 0.81069600  | -2.13318400 | -1.94850200 |
| H  | 1.27497000  | -2.68362000 | -1.12517600 |
| H  | 0.63345900  | -2.84943800 | -2.75852900 |
| H  | 1.53875500  | -1.40460800 | -2.31577700 |
| C  | -0.37122400 | 0.56170200  | -3.11354000 |
| H  | 0.71870600  | 0.56541800  | -3.02597900 |
| H  | -0.61307200 | 0.17467000  | -4.10949500 |
| H  | -0.71883800 | 1.59657000  | -3.07527100 |
| C  | -3.16503900 | 1.13698100  | -1.62001100 |
| H  | -2.69955300 | 1.93015400  | -2.20972500 |
| H  | -4.06920200 | 0.82684600  | -2.15543900 |
| H  | -3.48562200 | 1.56004400  | -0.66296100 |
| Co | -0.75974700 | -0.12525500 | -0.02061800 |

|                               |             |             |                             |
|-------------------------------|-------------|-------------|-----------------------------|
| C                             | -2.05444400 | 2.07094600  | 3.35669100                  |
| H                             | -3.08575500 | 2.16516200  | 3.02056200                  |
| H                             | -2.02024700 | 1.65168600  | 4.36342100                  |
| H                             | -1.60197500 | 3.06417100  | 3.41476100                  |
| C                             | 0.92105200  | -0.78136700 | 1.02867600                  |
| C                             | 1.12119800  | -2.01427200 | 1.60275100                  |
| C                             | 2.37339700  | -2.67089600 | 1.51965300                  |
| C                             | 3.39953800  | -2.10056200 | 0.82711200                  |
| C                             | 3.28418200  | -0.81638200 | 0.17194100                  |
| C                             | 1.76963300  | 1.11950200  | -0.10488200                 |
| C                             | 0.05683600  | 2.62819900  | -0.59112900                 |
| C                             | 0.96102800  | 3.64199500  | -0.84938700                 |
| C                             | 2.32131900  | 3.35572300  | -0.73794100                 |
| C                             | 2.74170800  | 2.09013100  | -0.35572100                 |
| H                             | 0.33398200  | 0.02866200  | 1.83151200                  |
| H                             | 0.30466700  | -2.45633200 | 2.16358100                  |
| H                             | 2.51357100  | -3.63195600 | 2.00714000                  |
| H                             | 4.36476700  | -2.58286300 | 0.72307400                  |
| H                             | -1.01865000 | 2.77352900  | -0.64819400                 |
| H                             | 0.60691800  | 4.62749400  | -1.12777100                 |
| H                             | 3.06110800  | 4.12555100  | -0.93203600                 |
| H                             | 3.78735300  | 1.84165800  | -0.24859000                 |
| N                             | 2.01625400  | -0.17409400 | 0.37900200                  |
| N                             | 0.45474200  | 1.39001200  | -0.25360500                 |
| O                             | 4.15247200  | -0.29931300 | -0.51452000                 |
| Zero-point correction=        |             |             | 0.435082 (Hartree/Particle) |
| Thermal correction to Energy= |             |             | 0.463460                    |

|                                              |              |
|----------------------------------------------|--------------|
| Thermal correction to Enthalpy=              | 0.464404     |
| Thermal correction to Gibbs Free Energy=     | 0.378310     |
| Sum of electronic and zero-point Energies=   | -1334.416827 |
| Sum of electronic and thermal Energies=      | -1334.388449 |
| Sum of electronic and thermal Enthalpies=    | -1334.387504 |
| Sum of electronic and thermal Free Energies= | -1334.473599 |

E(RM06L) = -1334.851908 A.U.

### B-TSa2-Co

1 1

Number of imaginary frequencies: 1

|   |             |             |             |
|---|-------------|-------------|-------------|
| C | -3.22816400 | -0.07605000 | 1.47170200  |
| C | -4.47934700 | 0.11239000  | 0.83610000  |
| C | -4.71717900 | 1.25562100  | 0.05224500  |
| C | -5.47374300 | -0.87740000 | 0.93840000  |
| C | -5.92414400 | 1.39782500  | -0.61810800 |
| H | -3.94599700 | 2.01660100  | -0.02537200 |
| C | -6.67778300 | -0.72232600 | 0.26485400  |
| H | -5.28645800 | -1.75707500 | 1.54705400  |
| C | -6.90428000 | 0.41108700  | -0.51492400 |
| H | -6.10349900 | 2.28192700  | -1.22189300 |
| H | -7.44380900 | -1.48675600 | 0.34973000  |
| H | -7.84733000 | 0.52786800  | -1.03993400 |
| C | -2.14247500 | -0.26893200 | 1.99937500  |
| P | -0.56416200 | -0.72403000 | 2.58944000  |
| C | 0.84938300  | 1.01459400  | 0.67631800  |
| C | 1.10983500  | 2.40693600  | 1.01896600  |
| C | 0.64024100  | 3.47626300  | 0.24154800  |

|   |             |             |             |
|---|-------------|-------------|-------------|
| C | 1.77600700  | 2.67816700  | 2.22550000  |
| C | 0.82432500  | 4.78303400  | 0.67050200  |
| H | 0.11646500  | 3.27563600  | -0.68910100 |
| C | 1.97353500  | 3.99077700  | 2.64060200  |
| H | 2.14015300  | 1.84679900  | 2.82548000  |
| C | 1.49627300  | 5.04397400  | 1.86545500  |
| H | 0.44213200  | 5.60372700  | 0.07167800  |
| H | 2.50132600  | 4.18915000  | 3.56825400  |
| H | 1.64716000  | 6.06877100  | 2.19002500  |
| C | 0.47866200  | -0.05795900 | 1.29905000  |
| C | -0.26524700 | 0.29773000  | 4.04681000  |
| H | 0.74189500  | 0.10437600  | 4.42450300  |
| H | -0.37136500 | 1.36049800  | 3.81469900  |
| H | -0.98459200 | 0.02607000  | 4.82255100  |
| O | -0.37174600 | -2.19522000 | 2.79249800  |
| C | 2.20504700  | 1.66843000  | -1.60032900 |
| C | 1.20920500  | 0.78612500  | -1.23825300 |
| H | 3.05041300  | 1.79230700  | -0.93439800 |
| C | -0.85698400 | -0.28992700 | -1.72337600 |
| C | -2.95999200 | -1.43297900 | -1.76303900 |
| C | -2.42796200 | -2.40217800 | -0.91860500 |
| C | -1.12576400 | -2.24497800 | -0.48130800 |
| N | -0.34587600 | -1.22940900 | -0.89597100 |
| H | -3.99307300 | -1.49342400 | -2.09298300 |
| H | -3.01575800 | -3.24185000 | -0.56583300 |
| H | -0.68560500 | -2.90831600 | 0.25497900  |
| N | 0.06146900  | 0.71953400  | -2.04706000 |

|    |             |             |             |
|----|-------------|-------------|-------------|
| C  | 3.49398000  | -0.91180700 | 0.17229600  |
| C  | 2.83192700  | -1.79902600 | 1.08628200  |
| C  | 2.12644400  | -2.77426100 | 0.32759300  |
| C  | 2.37346300  | -2.49616800 | -1.07426300 |
| C  | 3.24452900  | -1.38083100 | -1.16835600 |
| C  | 3.81281200  | -0.84771500 | -2.43425900 |
| H  | 4.30397300  | 0.11667900  | -2.29603300 |
| H  | 4.55942200  | -1.54561100 | -2.82859500 |
| H  | 3.04762200  | -0.71997000 | -3.20619900 |
| C  | 4.38687800  | 0.20504600  | 0.58980400  |
| H  | 3.85267900  | 0.96718800  | 1.17014500  |
| H  | 5.19316600  | -0.17023900 | 1.22889100  |
| H  | 4.85328900  | 0.70010000  | -0.26419100 |
| C  | 2.89497500  | -1.70498800 | 2.56721000  |
| H  | 2.03760900  | -2.19362100 | 3.03623500  |
| H  | 3.80909200  | -2.18329800 | 2.93766400  |
| H  | 2.92806300  | -0.66097600 | 2.89762800  |
| C  | 1.43789700  | -3.97362300 | 0.87466900  |
| H  | 0.84191600  | -4.48488600 | 0.11498600  |
| H  | 2.18841400  | -4.69403500 | 1.22057200  |
| H  | 0.79693300  | -3.72572200 | 1.72519900  |
| C  | 1.82473900  | -3.26747800 | -2.21902700 |
| H  | 2.49112300  | -4.09789500 | -2.47839200 |
| H  | 0.84705100  | -3.69866000 | -1.98783900 |
| H  | 1.71613700  | -2.64467800 | -3.11104100 |
| Co | 1.45581800  | -0.86031000 | -0.17389100 |
| C  | -2.18389300 | -0.35369900 | -2.15921400 |

|                                              |              |            |                             |
|----------------------------------------------|--------------|------------|-----------------------------|
| H                                            | -2.57491900  | 0.42342200 | -2.79630500                 |
| C                                            | -0.12288300  | 1.53249500 | -3.24700300                 |
| C                                            | 0.99383600   | 2.37814600 | -3.55887800                 |
| H                                            | 0.88744400   | 2.96467100 | -4.46341300                 |
| C                                            | 2.10847300   | 2.43858100 | -2.77354800                 |
| H                                            | 2.92828800   | 3.09869300 | -3.04514400                 |
| O                                            | -1.14561900  | 1.44910800 | -3.90945700                 |
| Zero-point correction=                       |              |            | 0.623427 (Hartree/Particle) |
| Thermal correction to Energy=                |              |            | 0.664412                    |
| Thermal correction to Enthalpy=              |              |            | 0.665356                    |
| Thermal correction to Gibbs Free Energy=     |              |            | 0.550786                    |
| Sum of electronic and zero-point Energies=   |              |            | -2177.211652                |
| Sum of electronic and thermal Energies=      |              |            | -2177.170667                |
| Sum of electronic and thermal Enthalpies=    |              |            | -2177.169723                |
| Sum of electronic and thermal Free Energies= |              |            | -2177.284293                |
| E(RM06L) =                                   | -2177.835079 | A.U.       |                             |

### B-TS3-Co

1 1

Number of imaginary frequencies: 1

|   |             |            |             |
|---|-------------|------------|-------------|
| C | -2.01961100 | 0.51353200 | 0.19204200  |
| C | -3.07621900 | 1.56294700 | 0.21493000  |
| C | -3.14709900 | 2.52367800 | -0.80209700 |
| C | -3.98399800 | 1.63583100 | 1.27865000  |
| C | -4.08782500 | 3.54703700 | -0.74859100 |
| H | -2.46565100 | 2.44607200 | -1.64940000 |
| C | -4.91228900 | 2.66739100 | 1.33964900  |
| H | -3.93626400 | 0.89552100 | 2.07323700  |

|   |             |             |             |
|---|-------------|-------------|-------------|
| C | -4.96603500 | 3.62543100  | 0.32888300  |
| H | -4.14111200 | 4.27715100  | -1.55084000 |
| H | -5.59404900 | 2.72778800  | 2.18228000  |
| H | -5.69600000 | 4.42727200  | 0.37797600  |
| C | -0.73203200 | 0.96666900  | -0.02184700 |
| P | -0.30449400 | 2.62001800  | 0.52960900  |
| C | 2.02759600  | 0.73927500  | 0.35526000  |
| C | 3.41187400  | 1.02114700  | 0.65974900  |
| C | 3.76521200  | 2.30552200  | 1.11866500  |
| C | 4.42172600  | 0.05462900  | 0.53272500  |
| C | 5.08407300  | 2.60620800  | 1.42576800  |
| H | 2.99151600  | 3.06086500  | 1.23052000  |
| C | 5.73980400  | 0.35453600  | 0.85123400  |
| H | 4.15736800  | -0.93976500 | 0.18264200  |
| C | 6.07447200  | 1.63261200  | 1.29449900  |
| H | 5.34182200  | 3.60142200  | 1.77430800  |
| H | 6.50736500  | -0.40693500 | 0.75358100  |
| H | 7.10481800  | 1.86971900  | 1.54038700  |
| C | 0.90066400  | 1.34842300  | 0.59357200  |
| C | 0.17658600  | 3.83315800  | -0.72160400 |
| H | 0.71478200  | 4.63555200  | -0.21231600 |
| H | 0.81155300  | 3.39996700  | -1.49439200 |
| H | -0.72158500 | 4.26351000  | -1.17135500 |
| O | -0.92583000 | 3.21601000  | 1.74534400  |
| C | -0.20696700 | -0.96529700 | -2.43071800 |
| C | 0.73869900  | 0.10671100  | -2.62934600 |
| C | 2.04823100  | -0.37442600 | -2.31410800 |

|   |             |             |             |
|---|-------------|-------------|-------------|
| C | 1.90298800  | -1.70003000 | -1.79686800 |
| C | 0.50612900  | -2.07036900 | -1.91969900 |
| C | -0.01069400 | -3.42608500 | -1.61350500 |
| H | -1.09167000 | -3.49508100 | -1.74732600 |
| H | 0.45121400  | -4.15316800 | -2.29122500 |
| H | 0.22033700  | -3.74846100 | -0.59416600 |
| C | -1.63165900 | -0.90649300 | -2.84307000 |
| H | -2.12335100 | 0.00678700  | -2.49138700 |
| H | -1.69842000 | -0.90524800 | -3.93741500 |
| H | -2.20394400 | -1.76135200 | -2.47839600 |
| C | 0.40141000  | 1.41054100  | -3.25489000 |
| H | 1.22123200  | 2.12844200  | -3.18337300 |
| H | 0.18669500  | 1.27282600  | -4.32128100 |
| H | -0.49300400 | 1.85459100  | -2.80480800 |
| C | 3.30607500  | 0.37901100  | -2.55828200 |
| H | 4.17090700  | -0.08416100 | -2.08199500 |
| H | 3.50104900  | 0.42007700  | -3.63576600 |
| H | 3.24863100  | 1.41168600  | -2.20085200 |
| C | 2.97268500  | -2.65945700 | -1.40691500 |
| H | 2.97163300  | -3.52449600 | -2.07964700 |
| H | 3.96702900  | -2.21223200 | -1.46269200 |
| H | 2.82775700  | -3.05580200 | -0.39576500 |
| C | -2.52981200 | -0.85657200 | 0.23574500  |
| C | -0.67288600 | -1.76043400 | 1.59685900  |
| C | 0.19829400  | -2.10691600 | 3.80364400  |
| C | 1.47128500  | -1.91915300 | 3.27531600  |
| C | 1.59114800  | -1.59594100 | 1.93616500  |

|                                              |              |             |                             |
|----------------------------------------------|--------------|-------------|-----------------------------|
| N                                            | 0.53924800   | -1.48668300 | 1.09600300                  |
| H                                            | 0.05416800   | -2.32644000 | 4.85625900                  |
| H                                            | 2.36151400   | -1.99838300 | 3.88825700                  |
| H                                            | 2.56158200   | -1.39280200 | 1.49971000                  |
| N                                            | -1.77781200  | -1.92111200 | 0.70797900                  |
| C                                            | -3.77641700  | -1.12913500 | -0.29162800                 |
| H                                            | -4.36285000  | -0.30705600 | -0.68008500                 |
| C                                            | -2.21148500  | -3.30537100 | 0.64625400                  |
| C                                            | -3.48768200  | -3.50523700 | 0.02262400                  |
| H                                            | -3.82484700  | -4.53300800 | -0.04379300                 |
| C                                            | -4.24600100  | -2.45336300 | -0.40172100                 |
| H                                            | -5.22311500  | -2.63153800 | -0.84199700                 |
| O                                            | -1.48891300  | -4.17553700 | 1.11488600                  |
| C                                            | -0.88476500  | -2.04211900 | 2.94346600                  |
| H                                            | -1.89466000  | -2.24276600 | 3.28254200                  |
| Co                                           | 0.80444500   | -0.41101400 | -0.63296800                 |
| Zero-point correction=                       |              |             | 0.624744 (Hartree/Particle) |
| Thermal correction to Energy=                |              |             | 0.664832                    |
| Thermal correction to Enthalpy=              |              |             | 0.665776                    |
| Thermal correction to Gibbs Free Energy=     |              |             | 0.554157                    |
| Sum of electronic and zero-point Energies=   |              |             | -2177.195677                |
| Sum of electronic and thermal Energies=      |              |             | -2177.155589                |
| Sum of electronic and thermal Enthalpies=    |              |             | -2177.154645                |
| Sum of electronic and thermal Free Energies= |              |             | -2177.266263                |
| E(RM06L) =                                   | -2177.820420 | A.U.        |                             |

### **B-TS4-Co**

1 1

Number of imaginary frequencies: 1

|   |             |            |             |
|---|-------------|------------|-------------|
| C | -2.34776400 | 0.40597600 | 0.04927700  |
| C | -3.59500900 | 1.17750100 | -0.11866800 |
| C | -3.73680800 | 2.11231500 | -1.15783500 |
| C | -4.65361800 | 1.01851300 | 0.78870200  |
| C | -4.88849100 | 2.88691300 | -1.26638100 |
| H | -2.97121800 | 2.17223800 | -1.92938300 |
| C | -5.79732600 | 1.79929600 | 0.68414200  |
| H | -4.55916200 | 0.29448800 | 1.59425200  |
| C | -5.91580100 | 2.73931500 | -0.33919500 |
| H | -4.99033200 | 3.59078600 | -2.08660100 |
| H | -6.59774300 | 1.67955400 | 1.40752600  |
| H | -6.81299500 | 3.34456900 | -0.42077400 |
| C | -1.16003200 | 1.11240700 | 0.02839000  |
| P | -0.88245500 | 2.82391400 | -0.17079600 |
| C | 1.54004100  | 0.98847000 | 0.19419500  |
| C | 2.62282200  | 1.87615300 | 0.52832100  |
| C | 2.47942600  | 3.26914500 | 0.69864600  |
| C | 3.89903600  | 1.31088200 | 0.72202300  |
| C | 3.58007000  | 4.05318000 | 1.01472400  |
| H | 1.50424100  | 3.73690400 | 0.62279700  |
| C | 4.99394100  | 2.09690700 | 1.04585200  |
| H | 3.99958900  | 0.23583300 | 0.61392200  |
| C | 4.83853200  | 3.47586800 | 1.18421400  |
| H | 3.45316200  | 5.12374000 | 1.14273200  |
| H | 5.96752500  | 1.63866600 | 1.19202500  |
| H | 5.69222200  | 4.09763700 | 1.43609400  |

|   |             |             |             |
|---|-------------|-------------|-------------|
| C | 0.22506400  | 0.95510600  | -0.03187700 |
| C | -0.33759600 | 3.34150700  | -1.81048600 |
| H | 0.72223000  | 3.61114400  | -1.77832900 |
| H | -0.49293000 | 2.53739900  | -2.53190900 |
| H | -0.90558700 | 4.22499000  | -2.11160700 |
| O | -0.69188000 | 3.79617400  | 0.94276700  |
| C | 0.79173100  | -2.23875200 | -1.85246100 |
| C | 1.04440500  | -0.98473400 | -2.47323900 |
| C | 2.38941900  | -0.56799800 | -2.14428400 |
| C | 2.97324500  | -1.58232400 | -1.31739700 |
| C | 1.96598200  | -2.58082200 | -1.10147100 |
| C | 2.13792600  | -3.80296300 | -0.27265800 |
| H | 1.22951700  | -4.05684800 | 0.28092700  |
| H | 2.39095600  | -4.65839000 | -0.91013400 |
| H | 2.95165200  | -3.68999700 | 0.44850300  |
| C | -0.40789400 | -3.09156100 | -2.06287600 |
| H | -1.34475800 | -2.52964900 | -1.98239300 |
| H | -0.38993000 | -3.53509700 | -3.06585700 |
| H | -0.44088100 | -3.91790900 | -1.34992200 |
| C | 0.07712600  | -0.24565500 | -3.33011400 |
| H | 0.41744300  | 0.77128600  | -3.54185400 |
| H | -0.04683900 | -0.74900300 | -4.29590600 |
| H | -0.91752000 | -0.19271200 | -2.86985000 |
| C | 3.06754300  | 0.65169600  | -2.66134300 |
| H | 3.89558300  | 0.96114300  | -2.01834400 |
| H | 3.47323900  | 0.47701600  | -3.66413900 |
| H | 2.37953000  | 1.50019900  | -2.73389800 |

|    |             |             |             |
|----|-------------|-------------|-------------|
| C  | 4.39800900  | -1.70107900 | -0.89728200 |
| H  | 4.90107000  | -2.48121600 | -1.48084400 |
| H  | 4.95296500  | -0.77367600 | -1.05643300 |
| H  | 4.50641800  | -1.98426300 | 0.15505000  |
| C  | -2.47427400 | -1.03887700 | 0.17322000  |
| C  | -0.58919900 | -1.34294700 | 1.77860000  |
| C  | -0.09459400 | -0.86201500 | 4.06870100  |
| C  | 1.25498000  | -0.88003900 | 3.73348200  |
| C  | 1.60640700  | -1.08194800 | 2.40761700  |
| N  | 0.70384200  | -1.28461000 | 1.43160400  |
| H  | -0.41237400 | -0.68001500 | 5.09013900  |
| H  | 2.02646600  | -0.71972100 | 4.47756400  |
| H  | 2.64317300  | -1.05235300 | 2.08437600  |
| N  | -1.52433400 | -1.82983600 | 0.80677700  |
| C  | -3.55027200 | -1.66659900 | -0.43042200 |
| H  | -4.26971100 | -1.05737500 | -0.96140200 |
| C  | -1.60139200 | -3.27433600 | 0.85461200  |
| C  | -2.76193500 | -3.84437700 | 0.22851800  |
| H  | -2.84728800 | -4.92308100 | 0.29123600  |
| C  | -3.69913600 | -3.06683600 | -0.38370200 |
| H  | -4.56715200 | -3.52284400 | -0.85086900 |
| O  | -0.71798400 | -3.89833900 | 1.42911400  |
| C  | -1.03172500 | -1.11782100 | 3.07582500  |
| H  | -2.09312100 | -1.17589700 | 3.29360000  |
| Co | 1.27239700  | -0.73461500 | -0.45245500 |

Zero-point correction= 0.624188 (Hartree/Particle)

Thermal correction to Energy= 0.664882

|                                              |              |
|----------------------------------------------|--------------|
| Thermal correction to Enthalpy=              | 0.665826     |
| Thermal correction to Gibbs Free Energy=     | 0.551977     |
| Sum of electronic and zero-point Energies=   | -2177.204239 |
| Sum of electronic and thermal Energies=      | -2177.163545 |
| Sum of electronic and thermal Enthalpies=    | -2177.162601 |
| Sum of electronic and thermal Free Energies= | -2177.276450 |

E(RM06L) = -2177.828427 A.U.

**(S)B-TS5-Co**

1 1

Number of imaginary frequencies: 1

|   |             |             |             |
|---|-------------|-------------|-------------|
| C | -2.26519100 | 0.42290900  | -0.59416600 |
| C | -3.55760900 | 1.11106400  | -0.62993400 |
| C | -3.65331500 | 2.43468000  | -1.09594900 |
| C | -4.73328300 | 0.48241300  | -0.18190300 |
| C | -4.86528600 | 3.10886200  | -1.09615500 |
| H | -2.76715900 | 2.91463900  | -1.50623600 |
| C | -5.94542900 | 1.15891200  | -0.17799400 |
| H | -4.68787000 | -0.54254200 | 0.17774800  |
| C | -6.01634400 | 2.47468900  | -0.63122600 |
| H | -4.91847800 | 4.12501600  | -1.47469700 |
| H | -6.83891000 | 0.65960500  | 0.18389400  |
| H | -6.96595100 | 3.00056300  | -0.63222100 |
| C | -1.09663700 | 1.12367400  | -0.35016400 |
| P | -1.04594000 | 2.53294300  | 0.79617400  |
| C | 1.43401100  | 1.15723600  | -0.09260500 |
| C | 2.40388500  | 2.21079800  | -0.11042900 |
| C | 3.32296800  | 2.35918700  | 0.94496300  |

|   |             |             |             |
|---|-------------|-------------|-------------|
| C | 2.47427400  | 3.10015900  | -1.20124500 |
| C | 4.26915600  | 3.37426700  | 0.91747400  |
| H | 3.26476400  | 1.67815900  | 1.79081700  |
| C | 3.44293200  | 4.09525000  | -1.23524500 |
| H | 1.77207500  | 2.98221100  | -2.02400000 |
| C | 4.33919300  | 4.23800900  | -0.17666900 |
| H | 4.96032500  | 3.49059800  | 1.74662800  |
| H | 3.49770300  | 4.76463500  | -2.08837500 |
| H | 5.09035300  | 5.02101000  | -0.20285800 |
| C | 0.25127300  | 0.70116700  | -0.46909900 |
| C | -0.52350500 | 4.10185500  | 0.02487700  |
| H | -1.04321900 | 4.90335900  | 0.55240500  |
| H | 0.55530600  | 4.25549300  | 0.10436000  |
| H | -0.79724200 | 4.11248900  | -1.03366200 |
| O | -2.16897700 | 2.65827300  | 1.78386000  |
| C | 3.25978800  | -0.84196100 | -1.11560700 |
| C | 3.36911100  | -1.53853800 | 0.13238000  |
| C | 2.40652400  | -2.59525300 | 0.11419100  |
| C | 1.71678700  | -2.57578400 | -1.15009500 |
| C | 2.22352600  | -1.47107800 | -1.89291700 |
| C | 1.78999500  | -1.06671100 | -3.25571600 |
| H | 1.90953100  | 0.00775200  | -3.41896900 |
| H | 2.38413100  | -1.58052900 | -4.02090300 |
| H | 0.74110200  | -1.32020400 | -3.43252100 |
| C | 4.18954400  | 0.19909800  | -1.62177800 |
| H | 4.63291800  | 0.79893100  | -0.82366800 |
| H | 5.01091000  | -0.29251800 | -2.15648000 |

|   |             |             |             |
|---|-------------|-------------|-------------|
| H | 3.71044900  | 0.88064900  | -2.32849200 |
| C | 4.35943800  | -1.25713300 | 1.20598100  |
| H | 3.98791100  | -1.54399500 | 2.19414200  |
| H | 5.28459200  | -1.82303500 | 1.04408100  |
| H | 4.63340100  | -0.19864600 | 1.23822000  |
| C | 2.16958800  | -3.57492800 | 1.20557200  |
| H | 1.11663600  | -3.86271900 | 1.27484900  |
| H | 2.75387400  | -4.48425100 | 1.02347100  |
| H | 2.48356800  | -3.18394500 | 2.17744400  |
| C | 0.78290900  | -3.60532100 | -1.67364200 |
| H | 1.30504300  | -4.24177800 | -2.39869600 |
| H | 0.40329500  | -4.25315600 | -0.88224400 |
| H | -0.06922500 | -3.16329200 | -2.19814000 |
| C | -2.28234600 | -1.03155200 | -0.77729700 |
| C | -1.11002700 | -1.32853300 | 1.37075600  |
| C | -1.43607900 | -0.74973600 | 3.67215400  |
| C | -0.06312100 | -0.54502000 | 3.77197900  |
| C | 0.71693300  | -0.72117700 | 2.64193000  |
| N | 0.20964200  | -1.09326000 | 1.44981600  |
| H | -2.08532200 | -0.60068900 | 4.52826500  |
| H | 0.39949000  | -0.24077200 | 4.70363200  |
| H | 1.78947500  | -0.54397000 | 2.65491200  |
| N | -1.63725900 | -1.84584600 | 0.14606000  |
| C | -2.98929400 | -1.62696800 | -1.79520300 |
| H | -3.48720100 | -0.98953300 | -2.51577800 |
| C | -1.71209600 | -3.28122700 | 0.13691900  |
| C | -2.47834100 | -3.83116400 | -0.94397300 |

|                                              |              |             |                             |
|----------------------------------------------|--------------|-------------|-----------------------------|
| H                                            | -2.55676800  | -4.91196300 | -0.96706800                 |
| C                                            | -3.08422700  | -3.03330700 | -1.87186700                 |
| H                                            | -3.65968800  | -3.48186200 | -2.67697000                 |
| O                                            | -1.14096300  | -3.90888600 | 1.02559200                  |
| C                                            | -1.96141800  | -1.16133700 | 2.45622200                  |
| H                                            | -3.01937600  | -1.36441700 | 2.33193900                  |
| Co                                           | 1.42525000   | -0.75895600 | -0.12078900                 |
| Zero-point correction=                       |              |             | 0.624163 (Hartree/Particle) |
| Thermal correction to Energy=                |              |             | 0.664709                    |
| Thermal correction to Enthalpy=              |              |             | 0.665654                    |
| Thermal correction to Gibbs Free Energy=     |              |             | 0.552505                    |
| Sum of electronic and zero-point Energies=   |              |             | -2177.202390                |
| Sum of electronic and thermal Energies=      |              |             | -2177.161844                |
| Sum of electronic and thermal Enthalpies=    |              |             | -2177.160900                |
| Sum of electronic and thermal Free Energies= |              |             | -2177.274049                |
| E(RM06L) =                                   | -2177.826554 | A.U.        |                             |

**(T)B-TS5-Co**

1 3

Number of imaginary frequencies: 1

|   |             |             |             |
|---|-------------|-------------|-------------|
| C | -2.25953100 | 0.38572500  | -0.47815900 |
| C | -3.55659900 | 1.03316800  | -0.67791500 |
| C | -3.62114600 | 2.33529300  | -1.20753200 |
| C | -4.76155100 | 0.39156400  | -0.33670600 |
| C | -4.83827700 | 2.97643800  | -1.37424600 |
| H | -2.69824200 | 2.82040000  | -1.51814800 |
| C | -5.97828300 | 1.03914100  | -0.49341200 |
| H | -4.73349100 | -0.61099200 | 0.08257900  |

|   |             |             |             |
|---|-------------|-------------|-------------|
| C | -6.02099200 | 2.33274800  | -1.01089500 |
| H | -4.87075300 | 3.97506600  | -1.79865700 |
| H | -6.89697000 | 0.53799100  | -0.20519700 |
| H | -6.97449800 | 2.83594700  | -1.13806400 |
| C | -1.15747300 | 1.15312500  | -0.07404100 |
| P | -1.41042400 | 2.45314100  | 1.15219900  |
| C | 1.43036200  | 1.23330400  | -0.14358200 |
| C | 2.42087300  | 2.27170900  | -0.18538300 |
| C | 3.38164600  | 2.38543300  | 0.83366200  |
| C | 2.43676300  | 3.19828800  | -1.24408300 |
| C | 4.32812700  | 3.40167500  | 0.79712400  |
| H | 3.36446200  | 1.67349300  | 1.65578300  |
| C | 3.39545900  | 4.20301800  | -1.28171700 |
| H | 1.69588600  | 3.10744100  | -2.03531900 |
| C | 4.34277900  | 4.30670700  | -0.26399600 |
| H | 5.05844200  | 3.48820700  | 1.59587600  |
| H | 3.40404500  | 4.90850100  | -2.10690300 |
| H | 5.08956900  | 5.09375800  | -0.29545500 |
| C | 0.21405400  | 0.82867000  | -0.28714800 |
| C | -0.61798900 | 3.99704200  | 0.61345300  |
| H | -0.53539100 | 4.67455400  | 1.46420800  |
| H | 0.37336500  | 3.81707300  | 0.19548600  |
| H | -1.25323900 | 4.47058100  | -0.14186500 |
| O | -2.78622500 | 2.60646500  | 1.73917400  |
| C | 3.23014500  | -0.74331700 | -1.22321400 |
| C | 3.44599700  | -1.44562200 | -0.00171200 |
| C | 2.50056100  | -2.51881000 | 0.03947100  |

|   |             |             |             |
|---|-------------|-------------|-------------|
| C | 1.74954900  | -2.52717300 | -1.19777400 |
| C | 2.16125400  | -1.40849700 | -1.94858300 |
| C | 1.63577600  | -1.00381000 | -3.28345800 |
| H | 2.37461000  | -0.43236300 | -3.85059100 |
| H | 1.36515500  | -1.88040500 | -3.87814800 |
| H | 0.73724400  | -0.38207300 | -3.20018600 |
| C | 4.10011300  | 0.31162100  | -1.80114700 |
| H | 4.62408300  | 0.89556600  | -1.04129100 |
| H | 4.86124500  | -0.16693500 | -2.42930700 |
| H | 3.54855500  | 1.00764700  | -2.43739800 |
| C | 4.49158100  | -1.14903000 | 1.01548300  |
| H | 4.15183400  | -1.36660800 | 2.03293200  |
| H | 5.38569900  | -1.76096000 | 0.84869400  |
| H | 4.80657500  | -0.10253800 | 0.98013900  |
| C | 2.36007500  | -3.51937900 | 1.12910300  |
| H | 1.32078900  | -3.83557600 | 1.26115600  |
| H | 2.95183100  | -4.41251000 | 0.89651500  |
| H | 2.72768000  | -3.13468100 | 2.08460500  |
| C | 0.84294100  | -3.60136500 | -1.67859800 |
| H | 1.36987300  | -4.22254100 | -2.41341100 |
| H | 0.51936300  | -4.25923700 | -0.87069800 |
| H | -0.04418800 | -3.20348400 | -2.17840700 |
| C | -2.21162200 | -1.05501300 | -0.70309100 |
| C | -1.03059400 | -1.37114200 | 1.43875600  |
| C | -1.34956400 | -0.82357700 | 3.74583500  |
| C | 0.02066800  | -0.59355800 | 3.83653000  |
| C | 0.79657000  | -0.74927100 | 2.69999400  |

|                                              |              |             |                             |
|----------------------------------------------|--------------|-------------|-----------------------------|
| N                                            | 0.28517400   | -1.12097900 | 1.51019600                  |
| H                                            | -1.99412300  | -0.69379400 | 4.60864300                  |
| H                                            | 0.48389800   | -0.28751200 | 4.76727000                  |
| H                                            | 1.86670400   | -0.55540000 | 2.70852600                  |
| N                                            | -1.54704300  | -1.87356900 | 0.20335000                  |
| C                                            | -2.90044600  | -1.65143400 | -1.73842300                 |
| H                                            | -3.40898800  | -1.01251300 | -2.44982300                 |
| C                                            | -1.59158400  | -3.30816300 | 0.16854300                  |
| C                                            | -2.34917100  | -3.85600400 | -0.92205300                 |
| H                                            | -2.40566400  | -4.93784100 | -0.96201400                 |
| C                                            | -2.96630500  | -3.05611100 | -1.84143300                 |
| H                                            | -3.52876500  | -3.50235200 | -2.65670600                 |
| O                                            | -1.00546700  | -3.94081300 | 1.04225200                  |
| C                                            | -1.87870700  | -1.23304000 | 2.53017400                  |
| H                                            | -2.93523700  | -1.44700600 | 2.41009800                  |
| Co                                           | 1.45736600   | -0.71413000 | -0.08196800                 |
| Zero-point correction=                       |              |             | 0.623656 (Hartree/Particle) |
| Thermal correction to Energy=                |              |             | 0.664534                    |
| Thermal correction to Enthalpy=              |              |             | 0.665479                    |
| Thermal correction to Gibbs Free Energy=     |              |             | 0.549471                    |
| Sum of electronic and zero-point Energies=   |              |             | -2177.216534                |
| Sum of electronic and thermal Energies=      |              |             | -2177.175656                |
| Sum of electronic and thermal Enthalpies=    |              |             | -2177.174712                |
| Sum of electronic and thermal Free Energies= |              |             | -2177.290719                |
| E(RM06L) =                                   | -2177.840191 | A.U.        |                             |

**(S)B-TS6-Co**

1 1

Number of imaginary frequencies: 1

|   |             |            |             |
|---|-------------|------------|-------------|
| C | -2.40242400 | 0.38711500 | 0.07155200  |
| C | -3.59682000 | 1.29342600 | 0.07989400  |
| C | -4.10066800 | 1.83941500 | -1.10572300 |
| C | -4.19778100 | 1.63462900 | 1.29459700  |
| C | -5.18205500 | 2.71625900 | -1.07688200 |
| H | -3.63918800 | 1.57010200 | -2.05521700 |
| C | -5.27351100 | 2.51593900 | 1.32360300  |
| H | -3.79797800 | 1.22789200 | 2.22054200  |
| C | -5.76755900 | 3.05721400 | 0.13945600  |
| H | -5.56507600 | 3.13307700 | -2.00386800 |
| H | -5.72136100 | 2.78701100 | 2.27458400  |
| H | -6.60621400 | 3.74600500 | 0.16471100  |
| C | -1.19750900 | 1.01794700 | 0.08008000  |
| P | -0.96496700 | 2.82933300 | 0.01401900  |
| C | 0.71173000  | 2.13539500 | -0.01668500 |
| C | 1.95780700  | 2.83903700 | 0.04919300  |
| C | 3.20257900  | 2.22718900 | -0.19034900 |
| C | 1.93543800  | 4.21767400 | 0.35995600  |
| C | 4.37993100  | 2.95382200 | -0.11583200 |
| H | 3.21956200  | 1.17469700 | -0.43851300 |
| C | 3.11691500  | 4.93951200 | 0.44138900  |
| H | 0.98350800  | 4.69671600 | 0.57974400  |
| C | 4.34054600  | 4.31318500 | 0.20251700  |
| H | 5.33188400  | 2.46528100 | -0.30858000 |
| H | 3.08758600  | 5.99440700 | 0.69484200  |
| H | 5.26249400  | 4.88375000 | 0.26144200  |

|   |             |             |             |
|---|-------------|-------------|-------------|
| C | 0.27869600  | 0.79790800  | 0.08525600  |
| C | -1.31187400 | 3.47732200  | -1.64923900 |
| H | -0.60532800 | 4.28427500  | -1.86278900 |
| H | -1.22216000 | 2.71081300  | -2.42395900 |
| H | -2.32299600 | 3.88817300  | -1.66558500 |
| O | -1.38145600 | 3.74578000  | 1.11818900  |
| C | 2.75939900  | -1.06703400 | -1.91856300 |
| C | 2.41972600  | -2.39394100 | -1.47152800 |
| C | 1.04319600  | -2.61479000 | -1.77263900 |
| C | 0.48343900  | -1.38460600 | -2.24285900 |
| C | 1.56854900  | -0.43332200 | -2.36402400 |
| C | 1.46195200  | 0.90988400  | -2.98822300 |
| H | 2.17786600  | 1.62408200  | -2.57337100 |
| H | 1.65878400  | 0.83386800  | -4.06414100 |
| H | 0.45984500  | 1.32739700  | -2.86841100 |
| C | 4.14091100  | -0.52523700 | -1.92228000 |
| H | 4.57182000  | -0.52930900 | -0.91479300 |
| H | 4.77693600  | -1.16479500 | -2.54398300 |
| H | 4.19267500  | 0.48827700  | -2.32447500 |
| C | 3.37206100  | -3.38609100 | -0.90951900 |
| H | 2.85269400  | -4.17085200 | -0.35362700 |
| H | 3.94518700  | -3.87731300 | -1.70485500 |
| H | 4.09064800  | -2.90654400 | -0.23899900 |
| C | 0.36465600  | -3.92250700 | -1.63060500 |
| H | 0.40281800  | -4.31529000 | -0.61164600 |
| H | -0.68438600 | -3.87893000 | -1.92698300 |
| H | 0.86653900  | -4.64824700 | -2.28023800 |

|   |             |             |             |
|---|-------------|-------------|-------------|
| C | -0.89250700 | -1.17713000 | -2.76403800 |
| H | -0.88844900 | -1.19245800 | -3.86041000 |
| H | -1.57773900 | -1.95849500 | -2.42662800 |
| H | -1.30550400 | -0.21175700 | -2.45389000 |
| C | -2.70367700 | -1.03325800 | -0.07772100 |
| C | -0.91750200 | -1.86780900 | 1.43997300  |
| C | -0.57382200 | -2.21246100 | 3.78407400  |
| C | 0.73219000  | -2.57834600 | 3.48600000  |
| C | 1.17898100  | -2.43765700 | 2.18189200  |
| N | 0.39439100  | -2.01701400 | 1.17163900  |
| H | -0.94753800 | -2.24728900 | 4.80213900  |
| H | 1.41258600  | -2.93493500 | 4.25079900  |
| H | 2.21601400  | -2.61978200 | 1.92264000  |
| N | -1.83633700 | -2.02464400 | 0.35618800  |
| C | -3.82649300 | -1.41133000 | -0.78682300 |
| H | -4.49962900 | -0.64132800 | -1.13769500 |
| C | -2.11850600 | -3.44859300 | 0.18994900  |
| C | -3.22009200 | -3.74448400 | -0.67590600 |
| H | -3.39986400 | -4.79599700 | -0.86788200 |
| C | -4.06188800 | -2.76128600 | -1.10960100 |
| H | -4.93316600 | -3.01714500 | -1.70622300 |
| O | -1.42913400 | -4.26477400 | 0.78803600  |
| C | -1.42027900 | -1.88359100 | 2.73313100  |
| H | -2.48283900 | -1.72231400 | 2.88450100  |
| C | 2.74051900  | -0.02575300 | 1.89664900  |
| O | 2.87461900  | -0.70530200 | 0.81993000  |
| O | 1.63521600  | 0.44045500  | 2.28246900  |

|                                              |              |             |                             |
|----------------------------------------------|--------------|-------------|-----------------------------|
| H                                            | 0.86892700   | 0.40377600  | 1.14059100                  |
| C                                            | 3.95511800   | 0.18641700  | 2.74419800                  |
| H                                            | 3.89351100   | -0.46126200 | 3.62421700                  |
| H                                            | 4.86836700   | -0.04870900 | 2.19772300                  |
| H                                            | 3.98024700   | 1.21585800  | 3.10484400                  |
| Co                                           | 1.32506800   | -1.03299100 | -0.37950100                 |
| Zero-point correction=                       |              |             | 0.686527 (Hartree/Particle) |
| Thermal correction to Energy=                |              |             | 0.731185                    |
| Thermal correction to Enthalpy=              |              |             | 0.732129                    |
| Thermal correction to Gibbs Free Energy=     |              |             | 0.611851                    |
| Sum of electronic and zero-point Energies=   |              |             | -2406.259174                |
| Sum of electronic and thermal Energies=      |              |             | -2406.214516                |
| Sum of electronic and thermal Enthalpies=    |              |             | -2406.213572                |
| Sum of electronic and thermal Free Energies= |              |             | -2406.333850                |
| E(RM06L) =                                   | -2406.945701 | A.U.        |                             |

**(T)B-TS6-Co**

1 3

Number of imaginary frequencies: 1

|   |             |            |             |
|---|-------------|------------|-------------|
| C | -2.39726900 | 0.39837300 | 0.06767500  |
| C | -3.58389900 | 1.31576400 | 0.04127100  |
| C | -4.06433000 | 1.84566200 | -1.16182000 |
| C | -4.19299800 | 1.69355900 | 1.24101500  |
| C | -5.13456200 | 2.73623200 | -1.16495800 |
| H | -3.59123900 | 1.55499600 | -2.09933000 |
| C | -5.25802400 | 2.58863800 | 1.23764700  |
| H | -3.80774600 | 1.30629500 | 2.18113900  |
| C | -5.73155700 | 3.10951200 | 0.03640800  |

|   |             |             |             |
|---|-------------|-------------|-------------|
| H | -5.49899600 | 3.13983200  | -2.10514500 |
| H | -5.71254500 | 2.88664400  | 2.17727700  |
| H | -6.56159100 | 3.80905900  | 0.03640600  |
| C | -1.19462600 | 1.02977400  | 0.13945700  |
| P | -0.93306700 | 2.84164600  | 0.06600500  |
| C | 0.73767100  | 2.12463100  | 0.06093700  |
| C | 2.00776100  | 2.77786600  | 0.11441900  |
| C | 3.22774600  | 2.10522500  | -0.09937100 |
| C | 2.03909800  | 4.16236500  | 0.39602000  |
| C | 4.43241200  | 2.78403500  | -0.01999600 |
| H | 3.20628100  | 1.04806500  | -0.33885600 |
| C | 3.24840100  | 4.83580400  | 0.47809200  |
| H | 1.10492800  | 4.68430900  | 0.59345000  |
| C | 4.44611900  | 4.15100700  | 0.27064800  |
| H | 5.36612800  | 2.25325400  | -0.18780100 |
| H | 3.26178800  | 5.89605800  | 0.70907600  |
| H | 5.39123200  | 4.68208000  | 0.33189700  |
| C | 0.27761900  | 0.79992600  | 0.17762200  |
| C | -1.23749000 | 3.47154300  | -1.61187400 |
| H | -0.54669500 | 4.29793500  | -1.80124800 |
| H | -1.09322200 | 2.70399500  | -2.37783600 |
| H | -2.25855200 | 3.85278400  | -1.67120000 |
| O | -1.35619300 | 3.77460000  | 1.15232700  |
| C | 2.89581700  | -1.09681500 | -1.95441000 |
| C | 2.36884300  | -2.38984900 | -1.55596900 |
| C | 0.99317800  | -2.47732800 | -1.94783800 |
| C | 0.61732900  | -1.18300900 | -2.39308300 |

|   |             |             |             |
|---|-------------|-------------|-------------|
| C | 1.82207600  | -0.33760400 | -2.42292200 |
| C | 1.85248700  | 1.02920100  | -3.00107400 |
| H | 2.75762300  | 1.57696100  | -2.73078100 |
| H | 1.81187000  | 0.97573700  | -4.09582800 |
| H | 0.99272400  | 1.62594600  | -2.68132700 |
| C | 4.32034000  | -0.70171800 | -1.81974600 |
| H | 4.64291000  | -0.74252400 | -0.77250600 |
| H | 4.96580100  | -1.38611400 | -2.38081100 |
| H | 4.50179700  | 0.30723700  | -2.19718800 |
| C | 3.17129300  | -3.48023300 | -0.95342800 |
| H | 2.53990100  | -4.21764100 | -0.45150200 |
| H | 3.74113600  | -4.01126200 | -1.72629400 |
| H | 3.89312600  | -3.08531100 | -0.23304200 |
| C | 0.18408400  | -3.72257200 | -1.93274100 |
| H | 0.19752200  | -4.22369000 | -0.96126500 |
| H | -0.86020200 | -3.53102000 | -2.18889100 |
| H | 0.57676300  | -4.42797200 | -2.67343100 |
| C | -0.70081200 | -0.76978200 | -2.93962600 |
| H | -0.65760500 | -0.70287600 | -4.03349400 |
| H | -1.49016800 | -1.48030100 | -2.68206400 |
| H | -1.00369200 | 0.21617400  | -2.56930900 |
| C | -2.70036800 | -1.02290400 | -0.11943600 |
| C | -1.04117000 | -1.90077400 | 1.51183000  |
| C | -0.85285500 | -2.03395500 | 3.88747800  |
| C | 0.46199900  | -2.44737700 | 3.70936400  |
| C | 0.98377800  | -2.46382900 | 2.42477800  |
| N | 0.26555300  | -2.14971200 | 1.33507700  |

|                                          |             |             |                             |
|------------------------------------------|-------------|-------------|-----------------------------|
| H                                        | -1.28483600 | -1.96070100 | 4.88027300                  |
| H                                        | 1.08569000  | -2.72813800 | 4.55052100                  |
| H                                        | 2.02513000  | -2.70992000 | 2.24108000                  |
| N                                        | -1.87269400 | -2.03522200 | 0.35262300                  |
| C                                        | -3.78277200 | -1.37458200 | -0.89927700                 |
| H                                        | -4.42368400 | -0.59145800 | -1.27958300                 |
| C                                        | -2.15163000 | -3.45456900 | 0.12769100                  |
| C                                        | -3.22732400 | -3.72008600 | -0.78257600                 |
| H                                        | -3.41151800 | -4.76572900 | -1.00034000                 |
| C                                        | -4.02711700 | -2.71891700 | -1.24689300                 |
| H                                        | -4.87265100 | -2.95187300 | -1.88822000                 |
| O                                        | -1.48903800 | -4.29321100 | 0.72019500                  |
| C                                        | -1.62948300 | -1.77994100 | 2.76290700                  |
| H                                        | -2.68894700 | -1.55627200 | 2.83693500                  |
| C                                        | 2.76708400  | -0.20548600 | 1.93610700                  |
| O                                        | 2.83602000  | -0.90078200 | 0.86575000                  |
| O                                        | 1.71401900  | 0.36567700  | 2.32914000                  |
| H                                        | 0.87905700  | 0.37550600  | 1.20690400                  |
| C                                        | 3.99737200  | -0.10398400 | 2.78625300                  |
| H                                        | 4.89532700  | -0.32874400 | 2.20994300                  |
| H                                        | 4.06628400  | 0.88731600  | 3.23520300                  |
| H                                        | 3.92354000  | -0.82722900 | 3.60473900                  |
| Co                                       | 1.18072300  | -1.04424600 | -0.34423400                 |
| Zero-point correction=                   |             |             | 0.683064 (Hartree/Particle) |
| Thermal correction to Energy=            |             |             | 0.729132                    |
| Thermal correction to Enthalpy=          |             |             | 0.730076                    |
| Thermal correction to Gibbs Free Energy= |             |             | 0.604734                    |

|                                              |              |
|----------------------------------------------|--------------|
| Sum of electronic and zero-point Energies=   | -2406.248854 |
| Sum of electronic and thermal Energies=      | -2406.202786 |
| Sum of electronic and thermal Enthalpies=    | -2406.201842 |
| Sum of electronic and thermal Free Energies= | -2406.327185 |

E(RM06L) = -2406.931918 A.U.

### B-TS<sub>a</sub>1-Rh

1 1

Number of imaginary frequencies: 1

|   |             |             |             |
|---|-------------|-------------|-------------|
| C | -0.96581700 | -1.79835300 | -1.20503000 |
| C | -1.94500000 | -1.84582400 | -0.12439200 |
| C | -2.80795900 | -0.71808000 | -0.26098300 |
| C | -2.38217500 | 0.04448500  | -1.41901000 |
| C | -1.27207600 | -0.65818000 | -2.02017100 |
| O | 0.42651700  | 1.40518100  | 2.64508500  |
| O | -1.36861800 | 1.58104300  | 1.30682700  |
| C | -0.67314600 | 1.93747300  | 2.31927000  |
| C | -3.94006400 | -0.32819900 | 0.63430200  |
| H | -4.88298400 | -0.34849600 | 0.07707800  |
| H | -4.03280800 | -1.00228500 | 1.48675000  |
| H | -3.78974800 | 0.68764300  | 1.01269700  |
| C | -2.08755400 | -2.94437400 | 0.88237200  |
| H | -2.37988500 | -2.55930400 | 1.86187200  |
| H | -2.86614400 | -3.64277500 | 0.55302800  |
| H | -1.16070500 | -3.50645300 | 0.99709100  |
| C | 0.07875100  | -2.83221100 | -1.48925200 |
| H | 0.48095000  | -3.25695700 | -0.56857700 |
| H | -0.34956700 | -3.64912700 | -2.08162900 |

|   |             |             |             |
|---|-------------|-------------|-------------|
| H | 0.91385700  | -2.41251000 | -2.05369400 |
| C | -0.55238400 | -0.24647100 | -3.26399000 |
| H | 0.48100300  | -0.59745300 | -3.26705900 |
| H | -1.05673000 | -0.67448300 | -4.13832500 |
| H | -0.54499000 | 0.83898300  | -3.38301100 |
| C | -3.06714300 | 1.26615000  | -1.94382100 |
| H | -2.40137500 | 1.86467400  | -2.56955900 |
| H | -3.93149500 | 0.98455200  | -2.55746900 |
| H | -3.42744000 | 1.89304800  | -1.12485600 |
| C | -1.21440300 | 3.05162100  | 3.18177200  |
| H | -2.07963900 | 3.52280400  | 2.71620700  |
| H | -1.49945100 | 2.63556900  | 4.15302000  |
| H | -0.42600800 | 3.78638300  | 3.36130300  |
| C | 1.04187500  | -0.68253000 | 1.18870000  |
| C | 1.02492400  | -1.85918900 | 1.89604700  |
| C | 2.08687700  | -2.80205800 | 1.77689900  |
| C | 3.12428000  | -2.55433900 | 0.92886700  |
| C | 3.21844800  | -1.33738000 | 0.13429000  |
| C | 2.10938500  | 0.82457700  | -0.32466200 |
| C | 0.68608200  | 2.50128400  | -1.12019700 |
| C | 1.75836300  | 3.28348300  | -1.52088800 |
| C | 3.05117700  | 2.79480300  | -1.30914500 |
| C | 3.23914000  | 1.55822000  | -0.70102100 |
| H | 0.64126400  | 0.34529400  | 1.86568300  |
| H | 0.19926900  | -2.03943800 | 2.57448500  |
| H | 2.06607000  | -3.71738600 | 2.36183300  |
| H | 3.94533000  | -3.24902400 | 0.79416400  |

|                                              |              |             |                             |
|----------------------------------------------|--------------|-------------|-----------------------------|
| H                                            | -0.34280600  | 2.82199300  | -1.23774700                 |
| H                                            | 1.58353800   | 4.24883400  | -1.98151700                 |
| H                                            | 3.91482000   | 3.38159900  | -1.60441700                 |
| H                                            | 4.22391100   | 1.15376000  | -0.52115100                 |
| N                                            | 2.14921100   | -0.41118300 | 0.35776000                  |
| N                                            | 0.86333500   | 1.29200400  | -0.55657900                 |
| O                                            | 4.11233300   | -1.10439400 | -0.66828700                 |
| Rh                                           | -0.72883100  | 0.02979400  | 0.02126200                  |
| Zero-point correction=                       |              |             | 0.434754 (Hartree/Particle) |
| Thermal correction to Energy=                |              |             | 0.463838                    |
| Thermal correction to Enthalpy=              |              |             | 0.464782                    |
| Thermal correction to Gibbs Free Energy=     |              |             | 0.375239                    |
| Sum of electronic and zero-point Energies=   |              |             | -1298.205954                |
| Sum of electronic and thermal Energies=      |              |             | -1298.176871                |
| Sum of electronic and thermal Enthalpies=    |              |             | -1298.175927                |
| Sum of electronic and thermal Free Energies= |              |             | -1298.265470                |
| E(RB3LYP) =                                  | -1298.640709 | A.U.        |                             |

### B-TSa2-Rh

1 1

Number of imaginary frequencies: 1

|   |             |             |             |
|---|-------------|-------------|-------------|
| C | -2.90374800 | -1.47661500 | 1.35667000  |
| C | -4.10496900 | -1.43763800 | 0.59746200  |
| C | -4.63326300 | -0.19671000 | 0.18904500  |
| C | -4.72569400 | -2.63180400 | 0.18254500  |
| C | -5.75659000 | -0.15748200 | -0.63165700 |
| H | -4.15263000 | 0.71900400  | 0.51795400  |
| C | -5.85051000 | -2.57976700 | -0.63705400 |

|   |             |             |             |
|---|-------------|-------------|-------------|
| H | -4.31703700 | -3.58428200 | 0.50373900  |
| C | -6.36414300 | -1.34613200 | -1.04893000 |
| H | -6.16136400 | 0.79920400  | -0.94690200 |
| H | -6.32958300 | -3.50119300 | -0.95305600 |
| H | -7.24025600 | -1.31078400 | -1.68901200 |
| C | -1.84905300 | -1.49242300 | 1.96708800  |
| P | -0.16416500 | -1.42891100 | 2.45269600  |
| C | -0.00985400 | 1.07392800  | 1.03965700  |
| C | -0.81653600 | 2.21607500  | 1.40543800  |
| C | -1.92487500 | 2.60380800  | 0.62684300  |
| C | -0.52276700 | 2.90920900  | 2.59489200  |
| C | -2.72638800 | 3.66263400  | 1.04252600  |
| H | -2.16023300 | 2.06538100  | -0.28352900 |
| C | -1.33208400 | 3.96783700  | 3.00157500  |
| H | 0.33737000  | 2.61039700  | 3.18564300  |
| C | -2.43131300 | 4.34691600  | 2.22654900  |
| H | -3.58288000 | 3.95606400  | 0.44369000  |
| H | -1.10481800 | 4.49775000  | 3.92118300  |
| H | -3.05823900 | 5.17413000  | 2.54421300  |
| C | 0.41697100  | -0.08989000 | 1.37886100  |
| C | -0.12836500 | -0.75560500 | 4.14047200  |
| H | 0.91266500  | -0.59030200 | 4.43057900  |
| H | -0.68159200 | 0.18641400  | 4.18507500  |
| H | -0.57926900 | -1.48123300 | 4.82238700  |
| O | 0.60445700  | -2.70049000 | 2.24265200  |
| C | 1.33818700  | 2.71013300  | -0.76365500 |
| C | 0.75442800  | 1.46405900  | -0.80556100 |

|   |             |             |             |
|---|-------------|-------------|-------------|
| H | 2.03293500  | 2.92693300  | 0.03791700  |
| C | -0.72624100 | -0.13716300 | -1.79596500 |
| C | -2.33104900 | -1.85501700 | -2.27773900 |
| C | -1.50488500 | -2.77990000 | -1.64112700 |
| C | -0.31920800 | -2.32564300 | -1.08232500 |
| N | 0.06792900  | -1.04016700 | -1.17578800 |
| H | -3.28788500 | -2.15976200 | -2.68778900 |
| H | -1.78152900 | -3.82313700 | -1.54487300 |
| H | 0.32836700  | -2.97360200 | -0.50522900 |
| N | -0.22810700 | 1.19102100  | -1.77038800 |
| C | 3.87920800  | 0.22307400  | 0.37101900  |
| C | 3.58308800  | -1.05861600 | 0.97024400  |
| C | 3.25987900  | -1.96461200 | -0.07576500 |
| C | 3.43612900  | -1.25617000 | -1.35149500 |
| C | 3.85554500  | 0.06794100  | -1.07352100 |
| C | 4.21658600  | 1.13284200  | -2.06178800 |
| H | 3.78557100  | 2.09767600  | -1.78179200 |
| H | 5.30487000  | 1.25401300  | -2.11006800 |
| H | 3.86124500  | 0.88937700  | -3.06461600 |
| C | 4.35934500  | 1.43373000  | 1.11191400  |
| H | 3.80657400  | 1.57926200  | 2.04348100  |
| H | 5.41929900  | 1.32297800  | 1.37141400  |
| H | 4.26343100  | 2.33854700  | 0.50856100  |
| C | 3.63569800  | -1.37812000 | 2.43179800  |
| H | 2.92771800  | -2.16844800 | 2.68451800  |
| H | 4.64590300  | -1.70883600 | 2.70221500  |
| H | 3.40643900  | -0.49816500 | 3.03876100  |

|                                              |              |             |                             |
|----------------------------------------------|--------------|-------------|-----------------------------|
| C                                            | 2.96158400   | -3.42341500 | 0.08428400                  |
| H                                            | 2.50591500   | -3.83920900 | -0.81748900                 |
| H                                            | 3.89070500   | -3.97904800 | 0.26092800                  |
| H                                            | 2.28902700   | -3.59111700 | 0.92825100                  |
| C                                            | 3.25116600   | -1.88608400 | -2.69635700                 |
| H                                            | 4.10644200   | -2.52978300 | -2.93348300                 |
| H                                            | 2.35401700   | -2.51057700 | -2.71881400                 |
| H                                            | 3.16120300   | -1.13782500 | -3.48562800                 |
| C                                            | -1.95279300  | -0.51780300 | -2.35380000                 |
| H                                            | -2.57494600  | 0.22134500  | -2.83115100                 |
| C                                            | -0.69195300  | 2.18986700  | -2.70445700                 |
| C                                            | 0.01715500   | 3.45366800  | -2.63494600                 |
| H                                            | -0.30128600  | 4.18987200  | -3.36326900                 |
| C                                            | 0.98934500   | 3.70477000  | -1.71223900                 |
| H                                            | 1.48285300   | 4.67228200  | -1.68652600                 |
| O                                            | -1.60672000  | 1.96638900  | -3.48695900                 |
| Rh                                           | 1.77788100   | -0.27435800 | -0.15917900                 |
| Zero-point correction=                       |              |             | 0.623149 (Hartree/Particle) |
| Thermal correction to Energy=                |              |             | 0.665008                    |
| Thermal correction to Enthalpy=              |              |             | 0.665952                    |
| Thermal correction to Gibbs Free Energy=     |              |             | 0.547697                    |
| Sum of electronic and zero-point Energies=   |              |             | -2141.106055                |
| Sum of electronic and thermal Energies=      |              |             | -2141.064196                |
| Sum of electronic and thermal Enthalpies=    |              |             | -2141.063252                |
| Sum of electronic and thermal Free Energies= |              |             | -2141.181507                |
| E(RB3LYP) =                                  | -2141.729204 | A.U.        |                             |

### **B-TS3-Rh**

Number of imaginary frequencies: 1

|   |             |             |             |
|---|-------------|-------------|-------------|
| C | -2.16848300 | 0.51036900  | 0.08718900  |
| C | -3.37814900 | 1.38216700  | -0.07449900 |
| C | -3.58247800 | 2.09746600  | -1.26415400 |
| C | -4.30963400 | 1.50390000  | 0.96715100  |
| C | -4.68964800 | 2.93561500  | -1.40374200 |
| H | -2.87941100 | 1.97737400  | -2.08371900 |
| C | -5.40621100 | 2.35213300  | 0.83133400  |
| H | -4.15985600 | 0.94816600  | 1.88783800  |
| C | -5.59847600 | 3.06951000  | -0.35298800 |
| H | -4.84498500 | 3.47673000  | -2.33218500 |
| H | -6.11068100 | 2.45659600  | 1.65053800  |
| H | -6.45689700 | 3.72563100  | -0.45699400 |
| C | -0.96918300 | 1.13677400  | -0.06612800 |
| P | -0.61682400 | 2.87771800  | 0.10143800  |
| C | 1.86237100  | 1.11134000  | 0.26366200  |
| C | 3.23150200  | 1.50214000  | 0.54723600  |
| C | 3.56201200  | 2.86385700  | 0.70810100  |
| C | 4.24391100  | 0.53711200  | 0.69330800  |
| C | 4.87023000  | 3.24058900  | 0.99343000  |
| H | 2.78583900  | 3.61670800  | 0.60897400  |
| C | 5.55106000  | 0.91621700  | 0.98831200  |
| H | 3.98970000  | -0.51067500 | 0.57527200  |
| C | 5.86757900  | 2.26917300  | 1.13458700  |
| H | 5.11445900  | 4.29160800  | 1.11158000  |
| H | 6.32185600  | 0.16045800  | 1.10369000  |

|   |             |             |             |
|---|-------------|-------------|-------------|
| H | 6.88645900  | 2.56726700  | 1.36120800  |
| C | 0.71965900  | 1.74286900  | 0.25748500  |
| C | -0.47925900 | 3.76426400  | -1.48510300 |
| H | 0.21296400  | 4.60050400  | -1.35706000 |
| H | -0.12412500 | 3.10193200  | -2.27583800 |
| H | -1.46635600 | 4.15927500  | -1.73629800 |
| O | -1.11155200 | 3.70406300  | 1.24153300  |
| C | 0.07602000  | -1.60262100 | -2.39236900 |
| C | 1.03460700  | -0.53239500 | -2.66857200 |
| C | 2.32041700  | -0.93207800 | -2.16999000 |
| C | 2.11702900  | -2.12494100 | -1.40148500 |
| C | 0.72952600  | -2.56694200 | -1.61037500 |
| C | 0.21081500  | -3.88381400 | -1.13218400 |
| H | -0.86157500 | -3.98340600 | -1.30120000 |
| H | 0.71588600  | -4.69050100 | -1.67725700 |
| H | 0.39729900  | -4.03441600 | -0.06681800 |
| C | -1.32599400 | -1.62292300 | -2.91227700 |
| H | -1.84210500 | -0.68383700 | -2.69429400 |
| H | -1.31965500 | -1.75404400 | -4.00091200 |
| H | -1.90867900 | -2.43207500 | -2.47282000 |
| C | 0.76436300  | 0.64650300  | -3.55009200 |
| H | 1.44471900  | 1.47249200  | -3.33122800 |
| H | 0.89908500  | 0.37261000  | -4.60371700 |
| H | -0.26299700 | 0.99847600  | -3.42989700 |
| C | 3.61149700  | -0.23443300 | -2.46538400 |
| H | 4.42106600  | -0.57625100 | -1.82170800 |
| H | 3.89728600  | -0.43657800 | -3.50442600 |

|    |             |             |             |
|----|-------------|-------------|-------------|
| H  | 3.52613900  | 0.84795000  | -2.34586500 |
| C  | 3.15662100  | -2.97049200 | -0.73374200 |
| H  | 3.40228800  | -3.83236800 | -1.36638200 |
| H  | 4.08075400  | -2.41827000 | -0.55548700 |
| H  | 2.79335400  | -3.35867300 | 0.22136200  |
| Rh | 0.90321900  | -0.53247400 | -0.48115300 |
| C  | -2.47457400 | -0.92177000 | 0.28686000  |
| C  | -0.74044800 | -1.24400400 | 2.03105700  |
| C  | -0.21241400 | -0.79958200 | 4.32686300  |
| C  | 1.11419900  | -0.62896500 | 3.93464200  |
| C  | 1.43302800  | -0.73221200 | 2.58701800  |
| N  | 0.51938100  | -1.01592500 | 1.63451600  |
| H  | -0.50545300 | -0.70145400 | 5.36679600  |
| H  | 1.89422100  | -0.40229500 | 4.65243300  |
| H  | 2.44469800  | -0.56753700 | 2.24604600  |
| N  | -1.67916400 | -1.74504700 | 1.07172400  |
| C  | -3.55962500 | -1.47470900 | -0.35263100 |
| H  | -4.18655600 | -0.83868300 | -0.96190500 |
| C  | -1.87762100 | -3.16421700 | 1.19889700  |
| C  | -3.01881700 | -3.68406500 | 0.47963600  |
| H  | -3.19592600 | -4.74802700 | 0.58285000  |
| C  | -3.82937400 | -2.86548900 | -0.25009800 |
| H  | -4.69157500 | -3.27412900 | -0.76914500 |
| O  | -1.10298200 | -3.81873100 | 1.88844200  |
| C  | -1.15266200 | -1.12513500 | 3.35557000  |
| H  | -2.18939000 | -1.31811300 | 3.60424400  |

Zero-point correction=

0.625149 (Hartree/Particle)

|                                              |              |
|----------------------------------------------|--------------|
| Thermal correction to Energy=                | 0.665789     |
| Thermal correction to Enthalpy=              | 0.666733     |
| Thermal correction to Gibbs Free Energy=     | 0.553338     |
| Sum of electronic and zero-point Energies=   | -2141.088258 |
| Sum of electronic and thermal Energies=      | -2141.047618 |
| Sum of electronic and thermal Enthalpies=    | -2141.046674 |
| Sum of electronic and thermal Free Energies= | -2141.160068 |

E(RB3LYP) = -2141.713407 A.U.

B-TS4-Rh

1 1

Number of imaginary frequencies: 1

|   |             |             |             |
|---|-------------|-------------|-------------|
| C | -2.69143200 | 0.00622000  | -0.55778300 |
| C | -4.12797100 | 0.27782200  | -0.59172600 |
| C | -4.63279600 | 1.51319100  | -1.05283500 |
| C | -5.04647100 | -0.67583900 | -0.09805300 |
| C | -5.99505000 | 1.80530500  | -0.96530500 |
| H | -3.97183400 | 2.20602400  | -1.56072400 |
| C | -6.40130900 | -0.38159200 | -0.01775000 |
| H | -4.68418000 | -1.64243500 | 0.23776100  |
| C | -6.88023800 | 0.86542100  | -0.44053900 |
| H | -6.36519000 | 2.75710600  | -1.33340300 |
| H | -7.09004300 | -1.12100600 | 0.37908000  |
| H | -7.94062000 | 1.08923100  | -0.38024300 |
| C | -1.77265100 | 0.99500600  | -0.28768700 |
| P | -1.96212300 | 2.68500400  | 0.32470400  |
| C | 0.85898600  | 1.36842800  | -0.19433300 |
| C | 1.68784200  | 2.58048800  | -0.23491300 |

|   |             |             |             |
|---|-------------|-------------|-------------|
| C | 1.78389200  | 3.35653000  | -1.40244200 |
| C | 2.40331700  | 2.97536700  | 0.90732200  |
| C | 2.58731100  | 4.49760700  | -1.42649300 |
| H | 1.23566700  | 3.04855000  | -2.28809400 |
| C | 3.19219500  | 4.12471700  | 0.88438000  |
| H | 2.31969100  | 2.38454900  | 1.81424500  |
| C | 3.29291400  | 4.88462300  | -0.28457700 |
| H | 2.66191700  | 5.08456800  | -2.33709000 |
| H | 3.72754000  | 4.42923500  | 1.77864400  |
| H | 3.91458000  | 5.77413000  | -0.30397900 |
| C | -0.44244600 | 1.27167800  | -0.38807000 |
| C | -1.68756500 | 3.98777100  | -0.93010300 |
| H | -0.67714400 | 4.38970700  | -0.82229200 |
| H | -1.81438200 | 3.56490000  | -1.92870200 |
| H | -2.41456700 | 4.78673400  | -0.76478100 |
| O | -1.68810900 | 3.02821600  | 1.75813400  |
| C | 2.67126600  | -2.42666200 | -0.97121700 |
| C | 2.93691600  | -1.15884700 | -1.66827100 |
| C | 3.62569300  | -0.27805200 | -0.78244300 |
| C | 3.57225900  | -0.89345400 | 0.52181200  |
| C | 3.04343900  | -2.26216800 | 0.36492000  |
| C | 2.95064600  | -3.25357300 | 1.47973800  |
| H | 2.26169700  | -4.06213500 | 1.24298200  |
| H | 3.94281000  | -3.67052500 | 1.69216000  |
| H | 2.59024900  | -2.77768800 | 2.39578800  |
| C | 2.10621000  | -3.64669100 | -1.62365000 |
| H | 1.28487900  | -3.39209500 | -2.29932500 |

|    |             |             |             |
|----|-------------|-------------|-------------|
| H  | 2.87750800  | -4.14704400 | -2.22223900 |
| H  | 1.72624300  | -4.35062800 | -0.88342900 |
| C  | 2.70149400  | -0.93508200 | -3.12861300 |
| H  | 2.68861700  | 0.12865300  | -3.37349700 |
| H  | 3.49831500  | -1.40871200 | -3.71572400 |
| H  | 1.75320800  | -1.37487300 | -3.44864000 |
| C  | 4.34458100  | 0.97965400  | -1.15115100 |
| H  | 4.41286600  | 1.67358300  | -0.31314200 |
| H  | 5.36375600  | 0.73013900  | -1.47107900 |
| H  | 3.85320900  | 1.50456800  | -1.97169500 |
| C  | 4.20973900  | -0.36204700 | 1.76522700  |
| H  | 5.25645900  | -0.68831800 | 1.82054500  |
| H  | 4.19760400  | 0.72973700  | 1.78202100  |
| H  | 3.70763700  | -0.73380800 | 2.66174800  |
| Rh | 1.52840900  | -0.52489600 | -0.06970700 |
| C  | -2.21396800 | -1.36955200 | -0.79551400 |
| C  | -1.05646700 | -1.34975600 | 1.38513000  |
| C  | -1.76955200 | -0.80956700 | 3.60793000  |
| C  | -0.51491800 | -0.24185900 | 3.82565300  |
| C  | 0.41400000  | -0.25906700 | 2.79273000  |
| N  | 0.14867500  | -0.79527200 | 1.58677200  |
| H  | -2.52336600 | -0.80800900 | 4.38800400  |
| H  | -0.25824600 | 0.21807900  | 4.77284300  |
| H  | 1.39613600  | 0.18297800  | 2.90955600  |
| N  | -1.31162300 | -1.94751800 | 0.10201400  |
| C  | -2.62958600 | -2.09348400 | -1.88364000 |
| H  | -3.32075000 | -1.63458400 | -2.57874000 |

|                                              |              |             |                             |
|----------------------------------------------|--------------|-------------|-----------------------------|
| C                                            | -0.80621800  | -3.28176200 | -0.04041200                 |
| C                                            | -1.27163400  | -3.98440400 | -1.21449000                 |
| H                                            | -0.90793100  | -4.99814700 | -1.33078600                 |
| C                                            | -2.15038300  | -3.41535800 | -2.08929800                 |
| H                                            | -2.49633700  | -3.97507200 | -2.95347500                 |
| O                                            | -0.05344100  | -3.73649700 | 0.81731500                  |
| C                                            | -2.03955300  | -1.38422500 | 2.36907800                  |
| H                                            | -2.99444400  | -1.84704000 | 2.15118200                  |
| Zero-point correction=                       |              |             | 0.623982 (Hartree/Particle) |
| Thermal correction to Energy=                |              |             | 0.665433                    |
| Thermal correction to Enthalpy=              |              |             | 0.666377                    |
| Thermal correction to Gibbs Free Energy=     |              |             | 0.549693                    |
| Sum of electronic and zero-point Energies=   |              |             | -2141.096504                |
| Sum of electronic and thermal Energies=      |              |             | -2141.055053                |
| Sum of electronic and thermal Enthalpies=    |              |             | -2141.054109                |
| Sum of electronic and thermal Free Energies= |              |             | -2141.170793                |
| E(RB3LYP) =                                  | -2141.720486 | A.U.        |                             |

### B-TS5-Rh

1 1

Number of imaginary frequencies: 1

|   |             |             |             |
|---|-------------|-------------|-------------|
| C | -2.42630300 | 0.27183300  | -0.70901900 |
| C | -3.82192600 | 0.73315300  | -0.73154400 |
| C | -4.15108700 | 2.02227900  | -1.19574700 |
| C | -4.86651100 | -0.10220900 | -0.28693600 |
| C | -5.46733300 | 2.47282100  | -1.18131900 |
| H | -3.37077100 | 2.64939100  | -1.61524100 |
| C | -6.18160500 | 0.35147700  | -0.26798000 |

|   |             |             |             |
|---|-------------|-------------|-------------|
| H | -4.64227400 | -1.10917200 | 0.05046200  |
| C | -6.48666300 | 1.64218300  | -0.70915600 |
| H | -5.70208200 | 3.46539600  | -1.55301900 |
| H | -6.97140300 | -0.30145700 | 0.09033700  |
| H | -7.51395800 | 1.99255500  | -0.69906200 |
| C | -1.37896800 | 1.12710400  | -0.44858900 |
| P | -1.47950900 | 2.53772900  | 0.73601300  |
| C | 1.11233500  | 1.48014200  | -0.13408700 |
| C | 2.03221900  | 2.58152300  | -0.20319600 |
| C | 2.89499200  | 2.85740600  | 0.87586200  |
| C | 2.10731000  | 3.37824700  | -1.36470300 |
| C | 3.79391500  | 3.91695400  | 0.80289100  |
| H | 2.83622600  | 2.23972200  | 1.76625200  |
| C | 3.02575300  | 4.42328200  | -1.43807700 |
| H | 1.45829900  | 3.15309600  | -2.20579400 |
| C | 3.86661900  | 4.69837100  | -0.35588900 |
| H | 4.44380600  | 4.13268400  | 1.64527200  |
| H | 3.08551800  | 5.02442300  | -2.34005100 |
| H | 4.57694200  | 5.51685400  | -0.41479600 |
| C | 0.01783400  | 0.87769800  | -0.53155600 |
| C | -1.22201600 | 4.15692400  | -0.09048100 |
| H | -1.06571100 | 4.91671800  | 0.67838500  |
| H | -0.35861300 | 4.11860200  | -0.75520400 |
| H | -2.12792400 | 4.40241900  | -0.65555700 |
| O | -2.60228000 | 2.51329000  | 1.73363400  |
| C | 3.48296000  | -0.58973600 | -0.89527200 |
| C | 3.58333000  | -1.15478900 | 0.42861100  |

|    |             |             |             |
|----|-------------|-------------|-------------|
| C  | 2.76688800  | -2.33496800 | 0.45160000  |
| C  | 2.24742500  | -2.56470700 | -0.87629000 |
| C  | 2.65772200  | -1.46392000 | -1.69482100 |
| C  | 2.37278600  | -1.30963100 | -3.15553000 |
| H  | 2.38573500  | -0.26093700 | -3.45910300 |
| H  | 3.13218300  | -1.83779700 | -3.74602700 |
| H  | 1.39827100  | -1.72969400 | -3.41460800 |
| C  | 4.27787100  | 0.56385800  | -1.42062900 |
| H  | 4.52537100  | 1.28210600  | -0.63817800 |
| H  | 5.21699200  | 0.19185300  | -1.84792600 |
| H  | 3.74363000  | 1.10012700  | -2.20702500 |
| C  | 4.42457500  | -0.62591700 | 1.54754200  |
| H  | 4.00894000  | -0.89034600 | 2.52298700  |
| H  | 5.43628300  | -1.04840400 | 1.49998100  |
| H  | 4.51967100  | 0.46123600  | 1.49711600  |
| C  | 2.54630300  | -3.24556100 | 1.62017200  |
| H  | 1.52201500  | -3.62607200 | 1.62506400  |
| H  | 3.23170900  | -4.09982500 | 1.56613800  |
| H  | 2.73021300  | -2.73308800 | 2.56719600  |
| C  | 1.57578400  | -3.80940500 | -1.35966300 |
| H  | 2.32641700  | -4.47278100 | -1.80961900 |
| H  | 1.09177400  | -4.34839400 | -0.54577000 |
| H  | 0.82607800  | -3.59515200 | -2.12404500 |
| Rh | 1.40486100  | -0.58501300 | -0.01626200 |
| C  | -2.19795700 | -1.17534200 | -0.93189700 |
| C  | -1.28816300 | -1.33988100 | 1.35190600  |
| C  | -1.96472700 | -0.75319900 | 3.57516500  |

|                                              |              |             |                             |
|----------------------------------------------|--------------|-------------|-----------------------------|
| C                                            | -0.65936800  | -0.32531200 | 3.81377200                  |
| C                                            | 0.27111200   | -0.41473000 | 2.78602300                  |
| N                                            | -0.03637200  | -0.90275400 | 1.56749800                  |
| H                                            | -2.72387700  | -0.68010100 | 4.34633100                  |
| H                                            | -0.36421700  | 0.08478600  | 4.77273200                  |
| H                                            | 1.29257800   | -0.07667600 | 2.91578400                  |
| N                                            | -1.58303800  | -1.91459700 | 0.07380800                  |
| C                                            | -2.62208800  | -1.81856700 | -2.06478200                 |
| H                                            | -3.11340000  | -1.24251700 | -2.83835900                 |
| C                                            | -1.32643900  | -3.31657400 | -0.00985900                 |
| C                                            | -1.80193400  | -3.94047200 | -1.22179200                 |
| H                                            | -1.64403200  | -5.00966100 | -1.29653000                 |
| C                                            | -2.42069100  | -3.21860000 | -2.20223800                 |
| H                                            | -2.76959900  | -3.71642000 | -3.10246600                 |
| O                                            | -0.74951400  | -3.88044100 | 0.92065900                  |
| C                                            | -2.27809900  | -1.28331800 | 2.32706300                  |
| H                                            | -3.27177700  | -1.64566400 | 2.09511000                  |
| Zero-point correction=                       |              |             | 0.623953 (Hartree/Particle) |
| Thermal correction to Energy=                |              |             | 0.665137                    |
| Thermal correction to Enthalpy=              |              |             | 0.666081                    |
| Thermal correction to Gibbs Free Energy=     |              |             | 0.550587                    |
| Sum of electronic and zero-point Energies=   |              |             | -2141.093579                |
| Sum of electronic and thermal Energies=      |              |             | -2141.052395                |
| Sum of electronic and thermal Enthalpies=    |              |             | -2141.051451                |
| Sum of electronic and thermal Free Energies= |              |             | -2141.166944                |
| E(RB3LYP) =                                  | -2141.717532 | A.U.        |                             |

### B-TS6-Rh

Number of imaginary frequencies: 1

|   |             |            |             |
|---|-------------|------------|-------------|
| C | -2.54418300 | 0.24542000 | 0.08194700  |
| C | -3.82299800 | 1.04827500 | 0.10373100  |
| C | -4.41717200 | 1.54035500 | -1.06902800 |
| C | -4.40609400 | 1.35516800 | 1.34003000  |
| C | -5.57697900 | 2.31377400 | -1.00628100 |
| H | -3.95916000 | 1.32948600 | -2.03177700 |
| C | -5.56410400 | 2.13138900 | 1.40287900  |
| H | -3.93487200 | 1.00366400 | 2.25251400  |
| C | -6.15345000 | 2.60884100 | 0.23145200  |
| H | -6.02487200 | 2.69003900 | -1.92115800 |
| H | -5.99816000 | 2.37103300 | 2.36839600  |
| H | -7.05283100 | 3.21457000 | 0.28175500  |
| C | -1.41868600 | 0.97531000 | 0.29351600  |
| P | -1.31985100 | 2.82245900 | 0.31430600  |
| C | 0.42110100  | 2.23536400 | 0.22872300  |
| C | 1.65541900  | 3.00058500 | 0.14377500  |
| C | 2.75427300  | 2.81115000 | 1.00092500  |
| C | 1.74243500  | 4.00857900 | -0.84156100 |
| C | 3.91223400  | 3.56863900 | 0.84913700  |
| H | 2.66352000  | 2.12300500 | 1.82461600  |
| C | 2.91466100  | 4.74126600 | -1.01250400 |
| H | 0.89609500  | 4.19775500 | -1.49353400 |
| C | 4.00735000  | 4.51958300 | -0.17032900 |
| H | 4.74101500  | 3.42301300 | 1.53537700  |
| H | 2.96911500  | 5.49662800 | -1.79019400 |

|   |             |             |             |
|---|-------------|-------------|-------------|
| H | 4.91602000  | 5.10068500  | -0.29204700 |
| C | 0.07710000  | 0.89587400  | 0.40792100  |
| C | -1.84961800 | 3.58604600  | -1.25951400 |
| H | -1.39446000 | 4.57872000  | -1.31474200 |
| H | -1.55363600 | 2.99054700  | -2.12671300 |
| H | -2.93416200 | 3.70258600  | -1.24342200 |
| O | -1.72749200 | 3.60406900  | 1.52232000  |
| C | 2.70671900  | -0.15048600 | -1.86058900 |
| C | 3.05881300  | -1.53020900 | -1.55572100 |
| C | 1.92773100  | -2.35252100 | -1.83182100 |
| C | 0.86223500  | -1.49218700 | -2.32775900 |
| C | 1.36854900  | -0.15192800 | -2.38515400 |
| C | 0.62477800  | 1.01003300  | -2.95736600 |
| H | 1.01853700  | 1.95952600  | -2.59568200 |
| H | 0.71892500  | 0.99420200  | -4.05015600 |
| H | -0.43772800 | 0.94956100  | -2.71193700 |
| C | 3.67283200  | 0.98801500  | -1.80097300 |
| H | 4.20469300  | 0.99399100  | -0.84741900 |
| H | 4.41423000  | 0.88094900  | -2.60212500 |
| H | 3.18141500  | 1.95310300  | -1.91576000 |
| C | 4.39014300  | -1.94687300 | -1.02338500 |
| H | 4.41583900  | -3.00895800 | -0.77705300 |
| H | 5.16660800  | -1.74856800 | -1.77100300 |
| H | 4.63166100  | -1.37494400 | -0.12273900 |
| C | 1.83638600  | -3.83637100 | -1.69514200 |
| H | 0.90635300  | -4.13442200 | -1.20443000 |
| H | 1.86136600  | -4.29465400 | -2.69151900 |

|    |             |             |             |
|----|-------------|-------------|-------------|
| H  | 2.67180400  | -4.23837900 | -1.11999900 |
| C  | -0.41959200 | -1.94962900 | -2.94631900 |
| H  | -0.34138100 | -1.87483600 | -4.03803500 |
| H  | -0.63083300 | -2.98854500 | -2.70064100 |
| H  | -1.26924300 | -1.33937400 | -2.63287300 |
| Rh | 1.39305900  | -0.84640500 | -0.25306100 |
| C  | -2.69721600 | -1.17968300 | -0.28011500 |
| C  | -1.01909400 | -2.11341000 | 1.30127300  |
| C  | -0.97949900 | -2.71206500 | 3.62277800  |
| C  | 0.39640800  | -2.88875100 | 3.49986500  |
| C  | 1.00549600  | -2.56395100 | 2.29391500  |
| N  | 0.32124900  | -2.11999300 | 1.22371400  |
| H  | -1.48732000 | -2.90777400 | 4.56140400  |
| H  | 0.99898700  | -3.24568300 | 4.32713800  |
| H  | 2.07947500  | -2.62218300 | 2.17433600  |
| N  | -1.75784900 | -2.14554900 | 0.07484200  |
| C  | -3.74044100 | -1.56339100 | -1.09773300 |
| H  | -4.48631800 | -0.83679400 | -1.37764300 |
| C  | -1.78905100 | -3.50473600 | -0.43485200 |
| C  | -2.89022000 | -3.81799200 | -1.30699900 |
| H  | -2.93229100 | -4.83970400 | -1.66473900 |
| C  | -3.83967000 | -2.88576400 | -1.59799600 |
| H  | -4.68413500 | -3.14451600 | -2.23015400 |
| O  | -0.92588900 | -4.30302900 | -0.07801700 |
| C  | -1.70352100 | -2.34566200 | 2.49080400  |
| H  | -2.78660900 | -2.29903900 | 2.49410600  |
| C  | 2.46541400  | -0.05710800 | 2.43968800  |

|                                              |            |             |                             |
|----------------------------------------------|------------|-------------|-----------------------------|
| O                                            | 2.82593700 | -0.54042000 | 1.30974000                  |
| O                                            | 1.28996700 | 0.32249100  | 2.68736700                  |
| H                                            | 0.65262500 | 0.41467000  | 1.42016800                  |
| C                                            | 3.51963700 | 0.02580400  | 3.51813100                  |
| H                                            | 3.20691500 | 0.71338500  | 4.30395000                  |
| H                                            | 3.65531500 | -0.97063400 | 3.95250200                  |
| H                                            | 4.47486800 | 0.33259500  | 3.08710900                  |
| Zero-point correction=                       |            |             | 0.686276 (Hartree/Particle) |
| Thermal correction to Energy=                |            |             | 0.731936                    |
| Thermal correction to Enthalpy=              |            |             | 0.732880                    |
| Thermal correction to Gibbs Free Energy=     |            |             | 0.607622                    |
| Sum of electronic and zero-point Energies=   |            |             | -2370.177836                |
| Sum of electronic and thermal Energies=      |            |             | -2370.132176                |
| Sum of electronic and thermal Enthalpies=    |            |             | -2370.131232                |
| Sum of electronic and thermal Free Energies= |            |             | -2370.256491                |
| E(RB3LYP) = -2370.864113 A.U.                |            |             |                             |

### C-1

0 1

Number of imaginary frequencies: 0

|   |             |             |             |
|---|-------------|-------------|-------------|
| C | -0.42020500 | -0.83158900 | -1.65436200 |
| C | -1.20041800 | -1.85556200 | -1.04948300 |
| C | -2.57256700 | -1.41117100 | -1.00268700 |
| C | -2.63881600 | -0.12706500 | -1.65243500 |
| C | -1.31335400 | 0.25619700  | -2.00781700 |
| O | -1.62938700 | -0.93884400 | 1.82799500  |
| O | -2.85817100 | 0.70617700  | 1.14305000  |
| C | -2.57158200 | -0.11808600 | 2.07814400  |

|   |             |             |             |
|---|-------------|-------------|-------------|
| C | -3.71421100 | -2.16674300 | -0.42555600 |
| H | -4.14903700 | -2.84445400 | -1.16855400 |
| H | -3.39891200 | -2.77560900 | 0.42569800  |
| H | -4.51120500 | -1.49794000 | -0.09056100 |
| C | -0.70272400 | -3.12207100 | -0.46084400 |
| H | -1.08630300 | -3.26102800 | 0.55480200  |
| H | -1.04847600 | -3.97399000 | -1.05677100 |
| H | 0.38710400  | -3.15184500 | -0.41917900 |
| C | 1.02367700  | -0.89512300 | -1.99273900 |
| H | 1.58695600  | -1.54002500 | -1.31405500 |
| H | 1.13802400  | -1.30033300 | -3.00503900 |
| H | 1.49708100  | 0.09003900  | -1.99323800 |
| C | -0.89819600 | 1.51845900  | -2.67250500 |
| H | 0.09689600  | 1.83778600  | -2.34957900 |
| H | -0.85277300 | 1.38206400  | -3.75870600 |
| H | -1.59515400 | 2.33696100  | -2.47708700 |
| C | -3.86276500 | 0.69895500  | -1.78196900 |
| H | -3.63302300 | 1.74458600  | -1.99614200 |
| H | -4.48242200 | 0.32225300  | -2.60312300 |
| H | -4.46635100 | 0.66278600  | -0.87173000 |
| C | 4.18082400  | 0.74805400  | -0.34393400 |
| C | 3.24175600  | -0.02210700 | 0.33815900  |
| C | 3.50605300  | -1.36019400 | 0.71309500  |
| C | 4.74712200  | -1.93160400 | 0.41620200  |
| C | 5.69034300  | -1.16641400 | -0.25365700 |
| C | 5.40517400  | 0.15180300  | -0.63043400 |
| H | 3.98218500  | 1.77469700  | -0.61874200 |

|                                            |             |             |                             |
|--------------------------------------------|-------------|-------------|-----------------------------|
| H                                          | 4.96208700  | -2.95584100 | 0.70584800                  |
| H                                          | 6.66097500  | -1.59112700 | -0.48908400                 |
| H                                          | 6.15957000  | 0.73283700  | -1.15149400                 |
| C                                          | 1.38767200  | -0.89391300 | 1.34800100                  |
| H                                          | 0.40593100  | -0.86465000 | 1.79126200                  |
| C                                          | 2.33014300  | -1.87077800 | 1.35812500                  |
| H                                          | 2.21325100  | -2.84492300 | 1.81293800                  |
| N                                          | 1.90879100  | 0.25109200  | 0.72765000                  |
| C                                          | 1.21675700  | 1.42308800  | 0.53558000                  |
| N                                          | -0.14822300 | 1.39580000  | 0.53583800                  |
| C                                          | -0.76034000 | 2.60124300  | 0.52655100                  |
| C                                          | -0.07001700 | 3.79328000  | 0.43540200                  |
| C                                          | 1.31126100  | 3.68878700  | 0.28528000                  |
| N                                          | 1.94643000  | 2.52650900  | 0.35069000                  |
| H                                          | -1.84491400 | 2.57069700  | 0.56921300                  |
| H                                          | -0.58721000 | 4.74419300  | 0.43284400                  |
| H                                          | 1.93337700  | 4.56491100  | 0.11244700                  |
| Co                                         | -1.43706300 | -0.10325500 | 0.00299700                  |
| C                                          | -3.32213800 | -0.14424800 | 3.35795600                  |
| H                                          | -3.75893500 | 0.83027600  | 3.57457100                  |
| H                                          | -4.13882100 | -0.86818800 | 3.27457700                  |
| H                                          | -2.67842600 | -0.46790800 | 4.17592200                  |
| Zero-point correction=                     |             |             | 0.465277 (Hartree/Particle) |
| Thermal correction to Energy=              |             |             | 0.495196                    |
| Thermal correction to Enthalpy=            |             |             | 0.496140                    |
| Thermal correction to Gibbs Free Energy=   |             |             | 0.404774                    |
| Sum of electronic and zero-point Energies= |             |             | -1390.756594                |

Sum of electronic and thermal Energies= -1390.726674  
 Sum of electronic and thermal Enthalpies= -1390.725730  
 Sum of electronic and thermal Free Energies= -1390.817097  
 E(RM06L) = -1391.221871 A.U.

**C-2a**

0 1

Number of imaginary frequencies: 0

|   |             |             |             |
|---|-------------|-------------|-------------|
| C | -1.20142300 | -0.29263200 | -2.13655600 |
| C | -1.59055100 | -1.52786400 | -1.49355800 |
| C | -2.66594400 | -1.22816600 | -0.61476800 |
| C | -3.00052500 | 0.17383400  | -0.74045700 |
| C | -2.12880700 | 0.72792400  | -1.71342200 |
| O | -0.13626000 | -1.91822500 | 2.44101200  |
| O | -1.52036100 | -0.25280900 | 1.82199300  |
| C | -1.13258300 | -1.09372000 | 2.65151600  |
| C | -3.34773500 | -2.18769000 | 0.29140100  |
| H | -4.19825400 | -2.65107900 | -0.22148800 |
| H | -2.68459100 | -2.99854500 | 0.60597900  |
| H | -3.74023700 | -1.69191400 | 1.18294900  |
| C | -1.03795400 | -2.88008500 | -1.76268000 |
| H | -0.95521000 | -3.48185500 | -0.85261100 |
| H | -1.70304200 | -3.42238200 | -2.44414400 |
| H | -0.05422600 | -2.83220900 | -2.23147200 |
| C | -0.13057000 | -0.13001800 | -3.15471600 |
| H | 0.68870700  | -0.83336200 | -2.98688200 |
| H | -0.52019500 | -0.30058800 | -4.16470500 |
| H | 0.29327400  | 0.87788900  | -3.13696100 |

|   |             |             |             |
|---|-------------|-------------|-------------|
| C | -2.10923600 | 2.13063000  | -2.20003300 |
| H | -1.09114500 | 2.51008400  | -2.32222500 |
| H | -2.58716300 | 2.18309800  | -3.18449300 |
| H | -2.65365000 | 2.81227100  | -1.54284400 |
| C | -4.07861700 | 0.86102500  | 0.02048000  |
| H | -4.07042300 | 1.94149400  | -0.14316100 |
| H | -5.06829800 | 0.49962100  | -0.27850900 |
| H | -3.98068500 | 0.68292400  | 1.09673900  |
| C | 4.25039800  | 0.70661300  | 0.04917700  |
| C | 3.05963500  | -0.00689400 | -0.02992200 |
| C | 3.01866100  | -1.40709800 | -0.20966700 |
| C | 4.21744600  | -2.11771600 | -0.31437000 |
| C | 5.41422700  | -1.41610800 | -0.24128200 |
| C | 5.42848600  | -0.02700800 | -0.06242900 |
| H | 4.25699500  | 1.77971500  | 0.19155500  |
| H | 4.21146300  | -3.19508500 | -0.45105200 |
| H | 6.35497200  | -1.95140400 | -0.32274000 |
| H | 6.37929500  | 0.49373100  | -0.00862800 |
| C | 0.83509600  | -0.69351900 | -0.08828100 |
| H | 0.29912900  | -1.69238100 | 1.57749300  |
| C | 1.63239500  | -1.80026600 | -0.24941300 |
| H | 1.28347000  | -2.81713600 | -0.37741900 |
| N | 1.72232000  | 0.41139400  | 0.04485400  |
| C | 1.19078400  | 1.63802700  | 0.28778400  |
| N | -0.17166000 | 1.63466500  | 0.29908300  |
| C | -0.78409700 | 2.77247100  | 0.65012400  |
| C | -0.06685300 | 3.92439100  | 0.92515500  |

|                                              |              |             |                             |
|----------------------------------------------|--------------|-------------|-----------------------------|
| C                                            | 1.32084400   | 3.83409300  | 0.80986500                  |
| N                                            | 1.95804400   | 2.70523600  | 0.50550100                  |
| H                                            | -1.86992200  | 2.73176500  | 0.70227500                  |
| H                                            | -0.56319200  | 4.84426600  | 1.20554200                  |
| H                                            | 1.95242300   | 4.70410200  | 0.97714100                  |
| Co                                           | -1.00924500  | -0.08897700 | -0.13822200                 |
| C                                            | -1.79241000  | -1.25224900 | 3.97310900                  |
| H                                            | -2.61406500  | -0.54759400 | 4.08152100                  |
| H                                            | -2.16323000  | -2.27563900 | 4.07356800                  |
| H                                            | -1.06453300  | -1.10605100 | 4.77411800                  |
| Zero-point correction=                       |              |             | 0.465701 (Hartree/Particle) |
| Thermal correction to Energy=                |              |             | 0.495361                    |
| Thermal correction to Enthalpy=              |              |             | 0.496306                    |
| Thermal correction to Gibbs Free Energy=     |              |             | 0.406161                    |
| Sum of electronic and zero-point Energies=   |              |             | -1390.745963                |
| Sum of electronic and thermal Energies=      |              |             | -1390.716302                |
| Sum of electronic and thermal Enthalpies=    |              |             | -1390.715358                |
| Sum of electronic and thermal Free Energies= |              |             | -1390.805503                |
| E(RM06L) =                                   | -1391.211664 | A.U.        |                             |

### C-3a

1 1

Number of imaginary frequencies: 0

|   |             |             |             |
|---|-------------|-------------|-------------|
| C | -2.95519000 | -1.44152600 | -0.00007400 |
| C | -2.98639900 | -0.02086800 | -0.00001100 |
| C | -4.17320300 | 0.69674400  | -0.00009800 |
| C | -5.35337800 | -0.04692300 | -0.00024300 |
| C | -5.35163400 | -1.45116000 | -0.00030400 |

|   |             |             |             |
|---|-------------|-------------|-------------|
| C | -4.16168700 | -2.15951300 | -0.00023100 |
| C | -1.59003200 | -1.83999700 | 0.00007500  |
| C | -0.76869400 | -0.71820600 | 0.00015500  |
| H | -4.18036000 | 1.77902100  | -0.00005900 |
| H | -6.30244500 | 0.48017300  | -0.00030900 |
| H | -6.29717100 | -1.98315400 | -0.00041000 |
| H | -4.15613900 | -3.24517300 | -0.00027200 |
| H | -1.24428200 | -2.86537300 | 0.00009700  |
| C | -1.10346900 | 1.63736800  | -0.00009100 |
| N | -1.86119300 | 2.72892300  | -0.00008800 |
| C | -1.21225300 | 3.89255400  | -0.00017800 |
| C | 0.18020900  | 3.98841900  | -0.00018900 |
| C | 0.88552500  | 2.79960800  | -0.00026600 |
| N | 0.26469600  | 1.60678000  | -0.00027500 |
| H | -1.83492900 | 4.78442100  | -0.00013700 |
| H | 0.68938700  | 4.94341600  | -0.00017000 |
| H | 1.97163900  | 2.77093400  | -0.00033800 |
| N | -1.65093600 | 0.39161700  | 0.00009100  |
| C | 1.95635800  | -1.98690700 | -0.00027400 |
| C | 2.31819300  | -1.21521900 | -1.15332000 |
| C | 2.95892500  | 0.00241700  | -0.70814500 |
| C | 2.95797300  | 0.00212300  | 0.70970000  |
| C | 2.31669700  | -1.21575600 | 1.15358300  |
| C | 2.08633600  | -1.59247500 | 2.56955400  |
| H | 1.22824400  | -2.25866200 | 2.68033300  |
| H | 2.96306700  | -2.11749500 | 2.96877800  |
| H | 1.92238400  | -0.71710700 | 3.20274700  |

|                                              |              |             |                             |
|----------------------------------------------|--------------|-------------|-----------------------------|
| C                                            | 1.39093600   | -3.36022100 | -0.00100000                 |
| H                                            | 0.78045300   | -3.55095400 | -0.88690900                 |
| H                                            | 2.19951800   | -4.09943800 | -0.00144500                 |
| H                                            | 0.78058700   | -3.55192300 | 0.88478700                  |
| C                                            | 2.08942700   | -1.59112500 | -2.56975700                 |
| H                                            | 1.92426400   | -0.71549100 | -3.20228900                 |
| H                                            | 2.96741500   | -2.11409700 | -2.96891000                 |
| H                                            | 1.23266900   | -2.25882200 | -2.68169100                 |
| C                                            | 3.47569600   | 1.05922700  | -1.61867000                 |
| H                                            | 3.82462600   | 1.94029600  | -1.07530800                 |
| H                                            | 4.32534000   | 0.68406300  | -2.19902200                 |
| H                                            | 2.71971800   | 1.38538500  | -2.34068400                 |
| C                                            | 3.47338700   | 1.05866000  | 1.62129800                  |
| H                                            | 4.32205100   | 0.68326400  | 2.20292900                  |
| H                                            | 3.82323200   | 1.93982500  | 1.07868400                  |
| H                                            | 2.71627900   | 1.38472200  | 2.34217100                  |
| Co                                           | 1.02793100   | -0.19897800 | -0.00036100                 |
| Zero-point correction=                       |              |             | 0.400896 (Hartree/Particle) |
| Thermal correction to Energy=                |              |             | 0.425428                    |
| Thermal correction to Enthalpy=              |              |             | 0.426372                    |
| Thermal correction to Gibbs Free Energy=     |              |             | 0.347648                    |
| Sum of electronic and zero-point Energies=   |              |             | -1161.701802                |
| Sum of electronic and thermal Energies=      |              |             | -1161.677269                |
| Sum of electronic and thermal Enthalpies=    |              |             | -1161.676325                |
| Sum of electronic and thermal Free Energies= |              |             | -1161.755049                |
| E(RM06L) =                                   | -1162.102697 | A.U.        |                             |

**C-4**

Number of imaginary frequencies: 0

|   |             |             |             |
|---|-------------|-------------|-------------|
| C | 3.82574500  | -0.11528700 | -1.44675500 |
| C | 5.10077300  | 0.32789500  | -1.02225700 |
| C | 5.97146900  | -0.54428600 | -0.34294200 |
| C | 5.51460200  | 1.65104000  | -1.26120200 |
| C | 7.21221500  | -0.09796000 | 0.08266000  |
| H | 5.66424000  | -1.57142100 | -0.16394600 |
| C | 6.75956000  | 2.08033700  | -0.82964300 |
| H | 4.85323000  | 2.32696500  | -1.79619000 |
| C | 7.63236500  | 1.21764300  | -0.15360400 |
| H | 7.87636200  | -0.78197800 | 0.60484800  |
| H | 7.06932800  | 3.10430500  | -1.02293600 |
| C | 2.69330800  | -0.47702500 | -1.73829900 |
| P | 1.21794200  | -1.07088600 | -2.47369100 |
| C | -1.32086000 | -0.86023200 | -1.40541700 |
| C | -2.68291500 | -0.70178700 | -1.69555100 |
| C | -3.18105700 | 0.58898200  | -1.98119700 |
| C | -3.57198000 | -1.79481000 | -1.69140600 |
| C | -4.52629000 | 0.77266700  | -2.23403000 |
| H | -2.49709400 | 1.43451400  | -1.98451700 |
| C | -4.91822500 | -1.58978300 | -1.93732800 |
| H | -3.19041600 | -2.79144000 | -1.49019500 |
| C | -5.42206300 | -0.30721400 | -2.19991900 |
| H | -4.90289800 | 1.77222500  | -2.43562400 |
| H | -5.60113300 | -2.43504000 | -1.92723400 |
| C | -0.07884200 | -0.92371600 | -1.22496100 |

|   |             |             |             |
|---|-------------|-------------|-------------|
| C | 0.78163700  | 0.24686600  | -3.63390000 |
| H | -0.17908300 | 0.01049900  | -4.09760800 |
| H | 0.70886000  | 1.20915900  | -3.11833800 |
| H | 1.54463600  | 0.31059500  | -4.41204800 |
| O | 1.30407000  | -2.45046600 | -3.03572300 |
| C | -4.04309300 | 0.85070800  | 1.23528800  |
| C | -3.18753700 | 1.93774800  | 0.94424700  |
| C | -3.65757000 | 3.22751300  | 0.72257400  |
| C | -5.03684500 | 3.41523200  | 0.78843000  |
| C | -5.90576800 | 2.35342900  | 1.07033800  |
| C | -5.42148300 | 1.07035700  | 1.30037700  |
| C | -3.22716900 | -0.32736700 | 1.36438700  |
| C | -1.91888300 | 0.00334600  | 1.15256700  |
| H | -2.98052900 | 4.04385800  | 0.50487100  |
| H | -5.44246200 | 4.40799000  | 0.62000000  |
| H | -6.97512100 | 2.53916800  | 1.11568400  |
| H | -6.10030700 | 0.24936400  | 1.51674300  |
| H | -3.60967600 | -1.32396500 | 1.53900800  |
| C | -0.69626900 | 1.99192500  | 0.64873900  |
| N | -0.61771200 | 3.29905300  | 0.39579300  |
| C | 0.60371500  | 3.78713600  | 0.18935700  |
| C | 1.75221800  | 3.00034000  | 0.22645400  |
| C | 1.57035500  | 1.64717800  | 0.46655900  |
| N | 0.35589500  | 1.12200000  | 0.67450500  |
| H | 0.65956800  | 4.85460300  | -0.01539100 |
| H | 2.74166400  | 3.41048500  | 0.06857300  |
| H | 2.40077700  | 0.95160200  | 0.47528100  |

|    |             |             |             |
|----|-------------|-------------|-------------|
| N  | -1.89111200 | 1.39974300  | 0.89956900  |
| C  | -0.61968600 | -2.07357800 | 2.48080500  |
| C  | -0.24431000 | -2.81022800 | 1.31993900  |
| C  | 1.14114400  | -2.49968000 | 1.02176200  |
| C  | 1.56500800  | -1.49531100 | 1.91532300  |
| C  | 0.45200000  | -1.16632300 | 2.78123800  |
| C  | 0.46048500  | -0.17426900 | 3.88829300  |
| H  | -0.53921300 | 0.23105100  | 4.06569500  |
| H  | 0.80183800  | -0.63069400 | 4.82488400  |
| H  | 1.12767700  | 0.66513500  | 3.67502800  |
| C  | -1.82958700 | -2.27788300 | 3.31419500  |
| H  | -2.61525300 | -2.81725900 | 2.78271700  |
| H  | -1.54721400 | -2.89130500 | 4.17813000  |
| H  | -2.24726500 | -1.34369600 | 3.69212300  |
| C  | -1.06176700 | -3.82346800 | 0.60322400  |
| H  | -0.84411500 | -3.81826800 | -0.46938600 |
| H  | -0.85264500 | -4.83457100 | 0.97160500  |
| H  | -2.13204300 | -3.64077800 | 0.73535800  |
| C  | 1.97695900  | -3.22909700 | 0.03615800  |
| H  | 2.87516200  | -2.67226600 | -0.23968400 |
| H  | 2.30103400  | -4.17815100 | 0.48064600  |
| H  | 1.44418000  | -3.47025100 | -0.88653900 |
| C  | 2.94039100  | -0.94445600 | 2.03174300  |
| H  | 3.54062100  | -1.58560500 | 2.68821900  |
| H  | 3.45272700  | -0.90454100 | 1.06646600  |
| H  | 2.95350800  | 0.05444400  | 2.47518400  |
| Co | -0.17413000 | -0.79827000 | 0.88822800  |

|                                              |              |             |                             |
|----------------------------------------------|--------------|-------------|-----------------------------|
| C                                            | -6.88114400  | -0.07990900 | -2.41763600                 |
| H                                            | -7.06600800  | 0.48037200  | -3.33888300                 |
| H                                            | -7.44021300  | -1.01581300 | -2.46956500                 |
| H                                            | -7.30106900  | 0.51851700  | -1.60107900                 |
| C                                            | 8.98792600   | 1.67872100  | 0.27594900                  |
| H                                            | 9.72941000   | 1.48797800  | -0.50795800                 |
| H                                            | 9.00731600   | 2.75223300  | 0.47759600                  |
| H                                            | 9.33074000   | 1.15435800  | 1.17100800                  |
| Zero-point correction=                       |              |             | 0.703368 (Hartree/Particle) |
| Thermal correction to Energy=                |              |             | 0.750226                    |
| Thermal correction to Enthalpy=              |              |             | 0.751170                    |
| Thermal correction to Gibbs Free Energy=     |              |             | 0.620917                    |
| Sum of electronic and zero-point Energies=   |              |             | -2312.109778                |
| Sum of electronic and thermal Energies=      |              |             | -2312.062920                |
| Sum of electronic and thermal Enthalpies=    |              |             | -2312.061976                |
| Sum of electronic and thermal Free Energies= |              |             | -2312.192230                |
| E(RM06L) =                                   | -2312.813147 | A.U.        |                             |

**(S)C-5a**

1 1

Number of imaginary frequencies: 0

|   |             |             |             |
|---|-------------|-------------|-------------|
| C | -2.04919200 | -0.59811700 | -0.07339300 |
| C | -3.19269400 | -1.49853600 | -0.35008800 |
| C | -3.39976100 | -2.64082400 | 0.43160600  |
| C | -4.08493100 | -1.24280700 | -1.40208500 |
| C | -4.44547000 | -3.51475300 | 0.15612200  |
| H | -2.75340300 | -2.81617000 | 1.28926400  |
| C | -5.11859300 | -2.12336000 | -1.67851200 |

|   |             |             |             |
|---|-------------|-------------|-------------|
| H | -3.95028600 | -0.35332700 | -2.01234800 |
| C | -5.31699500 | -3.27942000 | -0.91018900 |
| H | -4.59919600 | -4.38748800 | 0.78686700  |
| H | -5.79011000 | -1.91636100 | -2.50851200 |
| C | -0.81236200 | -1.11020900 | 0.15261100  |
| P | -0.16645700 | -2.65947200 | -0.43321700 |
| C | 2.54119100  | -1.37450600 | -0.26262900 |
| C | 3.86866700  | -0.97132200 | -0.57974700 |
| C | 4.88498200  | -1.94353100 | -0.63846800 |
| C | 4.20125800  | 0.36943900  | -0.83611200 |
| C | 6.18409700  | -1.57367700 | -0.94624100 |
| H | 4.64060200  | -2.98247900 | -0.43847900 |
| C | 5.50583200  | 0.72291800  | -1.14499200 |
| H | 3.42608900  | 1.12979000  | -0.76908700 |
| C | 6.52265900  | -0.23858300 | -1.20757000 |
| H | 6.95818200  | -2.33584100 | -0.98468700 |
| H | 5.74748100  | 1.76550400  | -1.33714100 |
| C | 1.47892100  | -2.01080100 | -0.11332500 |
| C | -0.34187700 | -4.04304800 | 0.72370100  |
| H | 0.48558800  | -4.74119800 | 0.57603600  |
| H | -0.35707300 | -3.71628600 | 1.76570300  |
| H | -1.27659000 | -4.55806600 | 0.49227000  |
| O | -0.38665700 | -3.03478900 | -1.86197500 |
| C | -3.49629900 | 2.77783400  | 0.27138900  |
| C | -2.25176700 | 3.08147000  | -0.32092600 |
| C | -1.85779100 | 4.39388800  | -0.57200400 |
| C | -2.74862300 | 5.40405300  | -0.23226200 |

|   |             |             |             |
|---|-------------|-------------|-------------|
| C | -3.99648400 | 5.12072600  | 0.34529200  |
| C | -4.37803700 | 3.81548900  | 0.60527100  |
| C | -3.55274900 | 1.36356600  | 0.42566100  |
| C | -2.37050500 | 0.81615700  | -0.00485500 |
| H | -0.90327000 | 4.62404400  | -1.03057100 |
| H | -2.47117900 | 6.43612500  | -0.42232000 |
| H | -4.66614200 | 5.93818800  | 0.59274700  |
| H | -5.33788100 | 3.59353300  | 1.06168700  |
| H | -4.37562900 | 0.78039000  | 0.81760800  |
| C | -0.47431700 | 1.74293400  | -1.35368500 |
| N | -0.49875800 | 2.56571100  | -2.40088300 |
| C | 0.37582700  | 2.36885600  | -3.37880600 |
| C | 1.23956800  | 1.28028400  | -3.36757900 |
| C | 1.26964500  | 0.54154500  | -2.20151100 |
| N | 0.49193300  | 0.81257400  | -1.12831300 |
| H | 0.35137000  | 3.08178700  | -4.20039300 |
| H | 1.88693700  | 1.03215800  | -4.19915900 |
| H | 1.94839000  | -0.29377800 | -2.10250700 |
| N | -1.53424800 | 1.87725100  | -0.46375000 |
| C | 0.03692000  | -0.00811700 | 2.62593500  |
| C | 1.26413800  | -0.73183900 | 2.61750500  |
| C | 2.32306800  | 0.17581400  | 2.21445800  |
| C | 1.72804000  | 1.39916100  | 1.85199600  |
| C | 0.30849100  | 1.30174500  | 2.12241800  |
| C | -0.59129200 | 2.47569700  | 2.24550500  |
| H | -1.64786900 | 2.21575300  | 2.15473900  |
| H | -0.44973000 | 2.90793400  | 3.24464600  |

|                        |             |             |                             |
|------------------------|-------------|-------------|-----------------------------|
| H                      | -0.36729500 | 3.26470100  | 1.52560500                  |
| C                      | -1.26995200 | -0.49309900 | 3.13748300                  |
| H                      | -1.38041300 | -1.57329800 | 3.01040500                  |
| H                      | -1.35509400 | -0.27460700 | 4.20826600                  |
| H                      | -2.10929500 | -0.00942100 | 2.63077900                  |
| C                      | 1.50180300  | -2.10023000 | 3.14824300                  |
| H                      | 2.06895000  | -2.72271400 | 2.44824000                  |
| H                      | 2.08328300  | -2.04934700 | 4.07602900                  |
| H                      | 0.56786600  | -2.61404400 | 3.38405200                  |
| C                      | 3.76839100  | -0.12687300 | 2.37410200                  |
| H                      | 4.41376600  | 0.52552400  | 1.78374400                  |
| H                      | 4.03312900  | 0.01503100  | 3.42926000                  |
| H                      | 4.01076800  | -1.16276000 | 2.12404500                  |
| C                      | 2.40832000  | 2.63927700  | 1.38867100                  |
| H                      | 2.38886700  | 3.40798500  | 2.16948200                  |
| H                      | 3.45484700  | 2.46008400  | 1.13114000                  |
| H                      | 1.91142900  | 3.07111300  | 0.51201200                  |
| Co                     | 0.81941900  | -0.15189000 | 0.67583800                  |
| C                      | -6.42993300 | -4.22689000 | -1.22904600                 |
| H                      | -7.37653900 | -3.70066300 | -1.38250200                 |
| H                      | -6.22473200 | -4.77757400 | -2.15336500                 |
| H                      | -6.57712200 | -4.96283000 | -0.43563600                 |
| C                      | 7.92498800  | 0.13977800  | -1.55944800                 |
| H                      | 8.65290800  | -0.38236700 | -0.93292600                 |
| H                      | 8.15358000  | -0.13053900 | -2.59617100                 |
| H                      | 8.09504100  | 1.21364100  | -1.45875000                 |
| Zero-point correction= |             |             | 0.705993 (Hartree/Particle) |

|                                              |              |
|----------------------------------------------|--------------|
| Thermal correction to Energy=                | 0.751222     |
| Thermal correction to Enthalpy=              | 0.752166     |
| Thermal correction to Gibbs Free Energy=     | 0.628600     |
| Sum of electronic and zero-point Energies=   | -2312.127685 |
| Sum of electronic and thermal Energies=      | -2312.082457 |
| Sum of electronic and thermal Enthalpies=    | -2312.081513 |
| Sum of electronic and thermal Free Energies= | -2312.205078 |

E(RM06L) = -2312.833679 A.U.

**(T)C-5a**

1 3

Number of imaginary frequencies: 0

|   |             |             |             |
|---|-------------|-------------|-------------|
| C | -1.97459600 | -0.93900800 | -0.04987600 |
| C | -2.86486600 | -2.07815100 | -0.33909700 |
| C | -2.90651700 | -3.17374800 | 0.53391200  |
| C | -3.68857100 | -2.10066300 | -1.47440600 |
| C | -3.72281100 | -4.26294900 | 0.27187800  |
| H | -2.32038400 | -3.13586700 | 1.45010300  |
| C | -4.49234000 | -3.19892300 | -1.73872400 |
| H | -3.67860500 | -1.25714900 | -2.15997000 |
| C | -4.52107400 | -4.30342600 | -0.87737100 |
| H | -3.75440900 | -5.09481000 | 0.97136800  |
| H | -5.11212800 | -3.20677600 | -2.63208900 |
| C | -0.70117900 | -1.10444500 | 0.42109000  |
| P | 0.32640900  | -2.55356600 | 0.15680200  |
| C | 3.07954100  | -1.48063400 | -0.22770500 |
| C | 4.41190300  | -1.12550500 | -0.54630700 |
| C | 5.41064200  | -1.08028000 | 0.44510800  |

|   |             |             |             |
|---|-------------|-------------|-------------|
| C | 4.76352000  | -0.81300900 | -1.87336900 |
| C | 6.70825700  | -0.72643600 | 0.11432100  |
| H | 5.15480500  | -1.33128500 | 1.47133800  |
| C | 6.06738900  | -0.46186200 | -2.18757800 |
| H | 4.00632400  | -0.87531200 | -2.65116500 |
| C | 7.06396700  | -0.41209400 | -1.20473000 |
| H | 7.46870000  | -0.69694600 | 0.89060300  |
| H | 6.32631600  | -0.23013700 | -3.21769700 |
| C | 1.90552500  | -1.73019800 | 0.03591000  |
| C | 0.50863500  | -3.49207100 | 1.69758200  |
| H | 1.37907300  | -4.14616300 | 1.61095100  |
| H | 0.63984700  | -2.83658200 | 2.56118100  |
| H | -0.37701600 | -4.11431000 | 1.84132400  |
| O | 0.01171500  | -3.38587500 | -1.04262400 |
| C | -3.99833000 | 2.14323400  | -0.30093200 |
| C | -2.75481500 | 2.59716500  | -0.79156400 |
| C | -2.54108200 | 3.92304800  | -1.16270500 |
| C | -3.60720300 | 4.80130500  | -1.02224500 |
| C | -4.85034700 | 4.37222800  | -0.52641600 |
| C | -5.05733800 | 3.05224800  | -0.16337500 |
| C | -3.85114700 | 0.75878600  | -0.00740800 |
| C | -2.55478700 | 0.38098600  | -0.24599000 |
| H | -1.58832200 | 4.25905700  | -1.55892300 |
| H | -3.47589500 | 5.84142100  | -1.30308300 |
| H | -5.65824700 | 5.09027000  | -0.42925600 |
| H | -6.01715200 | 2.72325700  | 0.22275900  |
| H | -4.60622300 | 0.08866100  | 0.38179400  |

|   |             |             |             |
|---|-------------|-------------|-------------|
| C | -0.70607700 | 1.52737500  | -1.55494400 |
| N | -0.82358200 | 2.03765600  | -2.77510700 |
| C | 0.27471100  | 2.06807100  | -3.52991300 |
| C | 1.50440100  | 1.58588200  | -3.08768200 |
| C | 1.54607300  | 1.08375200  | -1.80046700 |
| N | 0.44900300  | 1.06726800  | -1.02262700 |
| H | 0.15679000  | 2.48851500  | -4.52623800 |
| H | 2.39169800  | 1.60975600  | -3.70846000 |
| H | 2.45630000  | 0.70033500  | -1.34767600 |
| N | -1.84210200 | 1.53303500  | -0.73147500 |
| C | -0.09836600 | 0.53947300  | 2.90985700  |
| C | 1.33093800  | 0.38144800  | 2.73679300  |
| C | 1.79159900  | 1.50002300  | 1.99808400  |
| C | 0.66660300  | 2.38420600  | 1.77452200  |
| C | -0.48260900 | 1.81612800  | 2.37479600  |
| C | -1.84093500 | 2.41360000  | 2.46838800  |
| H | -2.62791600 | 1.67568200  | 2.28769100  |
| H | -2.00957400 | 2.82153400  | 3.47193200  |
| H | -1.98567000 | 3.23249500  | 1.75906800  |
| C | -1.00701100 | -0.37406900 | 3.65131800  |
| H | -0.63656800 | -1.40212900 | 3.66695200  |
| H | -1.11544200 | -0.04744900 | 4.69225400  |
| H | -2.00733100 | -0.38964200 | 3.20864400  |
| C | 2.18507200  | -0.69544500 | 3.31288900  |
| H | 2.72416300  | -1.26081700 | 2.54536900  |
| H | 2.93371200  | -0.26349600 | 3.98586800  |
| H | 1.59975100  | -1.40403800 | 3.90317300  |

|                                              |              |             |                             |
|----------------------------------------------|--------------|-------------|-----------------------------|
| C                                            | 3.19736900   | 1.75868500  | 1.58175800                  |
| H                                            | 3.25692000   | 2.24502800  | 0.60186500                  |
| H                                            | 3.70520500   | 2.42358100  | 2.29054800                  |
| H                                            | 3.77805300   | 0.83370400  | 1.52761700                  |
| C                                            | 0.72466900   | 3.67490700  | 1.03578800                  |
| H                                            | 1.07920000   | 4.48340700  | 1.68485300                  |
| H                                            | 1.41497100   | 3.62917800  | 0.18665000                  |
| H                                            | -0.25925000  | 3.97117400  | 0.65886100                  |
| Co                                           | 0.34551100   | 0.44580300  | 0.83921900                  |
| C                                            | -5.36942100  | -5.49548400 | -1.18521600                 |
| H                                            | -6.28336500  | -5.21800800 | -1.71625600                 |
| H                                            | -4.82989100  | -6.20019700 | -1.82802100                 |
| H                                            | -5.65035900  | -6.03958800 | -0.28040300                 |
| C                                            | 8.47553600   | -0.06717000 | -1.55512100                 |
| H                                            | 8.96400400   | 0.49994200  | -0.75882900                 |
| H                                            | 9.07078600   | -0.97435200 | -1.70761100                 |
| H                                            | 8.53569200   | 0.51426400  | -2.47770700                 |
| Zero-point correction=                       |              |             | 0.703210 (Hartree/Particle) |
| Thermal correction to Energy=                |              |             | 0.750076                    |
| Thermal correction to Enthalpy=              |              |             | 0.751020                    |
| Thermal correction to Gibbs Free Energy=     |              |             | 0.619961                    |
| Sum of electronic and zero-point Energies=   |              |             | -2312.123945                |
| Sum of electronic and thermal Energies=      |              |             | -2312.077080                |
| Sum of electronic and thermal Enthalpies=    |              |             | -2312.076135                |
| Sum of electronic and thermal Free Energies= |              |             | -2312.207195                |
| E(RM06L) =                                   | -2312.827155 | A.U.        |                             |

(S) C-6

Number of imaginary frequencies: 0

|   |             |             |             |
|---|-------------|-------------|-------------|
| C | 1.84413400  | 1.06175600  | -0.18627800 |
| C | 2.86755900  | 2.13241300  | -0.11022600 |
| C | 2.79632500  | 3.12286700  | 0.87878200  |
| C | 3.91961400  | 2.20070100  | -1.03640600 |
| C | 3.73069900  | 4.14848100  | 0.93257600  |
| H | 2.02417200  | 3.05568700  | 1.64194100  |
| C | 4.84077200  | 3.23677500  | -0.98680900 |
| H | 3.99604600  | 1.44285200  | -1.81156400 |
| C | 4.76415000  | 4.23387600  | -0.00646700 |
| H | 3.66786200  | 4.89206200  | 1.72375400  |
| H | 5.63623800  | 3.27921100  | -1.72697600 |
| C | 0.53551700  | 1.49850200  | -0.12545300 |
| P | -0.37325900 | 2.98237000  | -0.10691700 |
| C | -2.02530800 | 0.50544100  | -0.08846200 |
| C | -3.35876800 | 0.92370000  | -0.42534300 |
| C | -3.64706600 | 2.21038700  | -0.93525800 |
| C | -4.42262700 | 0.00733700  | -0.32266100 |
| C | -4.94353100 | 2.55590600  | -1.27130100 |
| H | -2.84487100 | 2.92705200  | -1.09646800 |
| C | -5.71632300 | 0.36077200  | -0.67137100 |
| H | -4.20251300 | -0.99670800 | 0.03140900  |
| C | -6.00671000 | 1.64722600  | -1.14117600 |
| H | -5.14341400 | 3.55172900  | -1.65982800 |
| H | -6.51915000 | -0.36757300 | -0.58404300 |
| C | -0.87487000 | 1.23544900  | -0.06570900 |

|   |             |             |             |
|---|-------------|-------------|-------------|
| C | -0.60033500 | 3.75034100  | 1.51290500  |
| H | -1.64778400 | 4.04356800  | 1.61926400  |
| H | -0.32709900 | 3.06862500  | 2.31976500  |
| H | 0.01152800  | 4.65358000  | 1.56821900  |
| O | -0.66246700 | 3.88038200  | -1.26781900 |
| C | 3.87271500  | -1.99327900 | -0.09716600 |
| C | 2.70057500  | -2.48602900 | -0.71412200 |
| C | 2.58675600  | -3.80858700 | -1.13831600 |
| C | 3.67078200  | -4.64502400 | -0.90824800 |
| C | 4.83639100  | -4.18190900 | -0.27089600 |
| C | 4.94929700  | -2.86572900 | 0.13760700  |
| C | 3.65344600  | -0.61944100 | 0.15184400  |
| C | 2.37688000  | -0.27348900 | -0.26574800 |
| H | 1.69565700  | -4.17384000 | -1.63979000 |
| H | 3.61643400  | -5.68011400 | -1.23040900 |
| H | 5.65849600  | -4.87065500 | -0.10585900 |
| H | 5.85137900  | -2.50569000 | 0.62264700  |
| H | 4.34070900  | 0.07182600  | 0.61833500  |
| C | 0.68611500  | -1.55080200 | -1.66432600 |
| N | 1.01003700  | -1.84369200 | -2.92016600 |
| C | 0.01127400  | -2.03190400 | -3.78200000 |
| C | -1.32262300 | -1.92662800 | -3.40157200 |
| C | -1.56602900 | -1.59873000 | -2.08134900 |
| N | -0.56713200 | -1.42050100 | -1.18836200 |
| H | 0.29697800  | -2.26349100 | -4.80571100 |
| H | -2.13733500 | -2.07596400 | -4.09942000 |
| H | -2.57267100 | -1.46744200 | -1.69453300 |

|    |             |             |             |
|----|-------------|-------------|-------------|
| N  | 1.75698400  | -1.45380700 | -0.75589500 |
| C  | -0.00446400 | -1.80767200 | 2.24481500  |
| C  | -0.90407400 | -0.78252500 | 2.70100300  |
| C  | -2.25252600 | -1.14300800 | 2.36012700  |
| C  | -2.18493100 | -2.35549900 | 1.60357700  |
| C  | -0.79013300 | -2.75495600 | 1.54537000  |
| C  | -0.30869200 | -3.98846400 | 0.87184000  |
| H  | 0.77105100  | -3.97185400 | 0.70743100  |
| H  | -0.53525200 | -4.86794700 | 1.48563600  |
| H  | -0.80085800 | -4.14545000 | -0.09412500 |
| C  | 1.45191100  | -1.86840200 | 2.53564400  |
| H  | 1.92151800  | -0.88169300 | 2.48638500  |
| H  | 1.62368800  | -2.25667100 | 3.54660500  |
| H  | 1.98467700  | -2.52374800 | 1.84178000  |
| C  | -0.48933300 | 0.44173300  | 3.43441000  |
| H  | -1.27282500 | 1.20351100  | 3.42767700  |
| H  | -0.26657900 | 0.20776100  | 4.48209100  |
| H  | 0.42258100  | 0.87354300  | 3.00504400  |
| C  | -3.46461300 | -0.39585800 | 2.79421500  |
| H  | -4.37556800 | -0.78134800 | 2.33328400  |
| H  | -3.58521100 | -0.47129300 | 3.88047200  |
| H  | -3.40281700 | 0.66842500  | 2.54591000  |
| C  | -3.31093100 | -3.19169500 | 1.10395200  |
| H  | -3.34411200 | -4.14912000 | 1.63717400  |
| H  | -4.27944300 | -2.70877400 | 1.25098400  |
| H  | -3.21363500 | -3.43285900 | 0.03949100  |
| Co | -1.10191900 | -0.89107000 | 0.68383200  |

|                                              |              |            |                             |
|----------------------------------------------|--------------|------------|-----------------------------|
| C                                            | 5.74790200   | 5.36000900 | 0.02375000                  |
| H                                            | 6.75376500   | 5.02664500 | -0.24460300                 |
| H                                            | 5.47203400   | 6.13996500 | -0.69462700                 |
| H                                            | 5.79614000   | 5.83143900 | 1.00794700                  |
| C                                            | -7.39974600  | 2.04693600 | -1.50364900                 |
| H                                            | -7.78690600  | 2.79895300 | -0.80762800                 |
| H                                            | -7.44077200  | 2.49831200 | -2.49945000                 |
| H                                            | -8.08601900  | 1.19791800 | -1.48704700                 |
| Zero-point correction=                       |              |            | 0.705065 (Hartree/Particle) |
| Thermal correction to Energy=                |              |            | 0.750694                    |
| Thermal correction to Enthalpy=              |              |            | 0.751639                    |
| Thermal correction to Gibbs Free Energy=     |              |            | 0.625449                    |
| Sum of electronic and zero-point Energies=   |              |            | -2312.109443                |
| Sum of electronic and thermal Energies=      |              |            | -2312.063813                |
| Sum of electronic and thermal Enthalpies=    |              |            | -2312.062869                |
| Sum of electronic and thermal Free Energies= |              |            | -2312.189059                |
| E(RM06L) =                                   | -2312.814508 | A.U.       |                             |

(T) C-6

1 3

Number of imaginary frequencies: 0

|   |            |            |             |
|---|------------|------------|-------------|
| C | 2.44851400 | 0.51830400 | 0.20245100  |
| C | 3.80673000 | 1.04538000 | 0.32536000  |
| C | 4.06914300 | 2.16402500 | 1.13774700  |
| C | 4.88294100 | 0.47865000 | -0.38061100 |
| C | 5.34589000 | 2.68756200 | 1.23905400  |
| H | 3.25935700 | 2.58837000 | 1.72586200  |
| C | 6.15754900 | 1.01611800 | -0.28172500 |

|   |             |             |             |
|---|-------------|-------------|-------------|
| H | 4.70238600  | -0.36580400 | -1.03948600 |
| C | 6.41728600  | 2.12900500  | 0.52592100  |
| H | 5.52827000  | 3.53859200  | 1.89100300  |
| H | 6.97095500  | 0.57224600  | -0.85035600 |
| C | 1.38050500  | 1.39588800  | 0.25303000  |
| P | 0.91106300  | 3.03721800  | -0.17159700 |
| C | -1.29219800 | 1.03378500  | 0.20635500  |
| C | -2.46626400 | 1.87236700  | 0.00382800  |
| C | -2.54600500 | 3.18318600  | 0.51300500  |
| C | -3.58822500 | 1.38635600  | -0.69132500 |
| C | -3.67962400 | 3.95703900  | 0.32620300  |
| H | -1.71353700 | 3.57310600  | 1.09306900  |
| C | -4.71898600 | 2.16743100  | -0.88533200 |
| H | -3.56796800 | 0.36684100  | -1.07452000 |
| C | -4.78813800 | 3.47174500  | -0.38274800 |
| H | -3.71674500 | 4.96068900  | 0.74366800  |
| H | -5.56700800 | 1.76226600  | -1.43359300 |
| C | -0.03391400 | 1.55356300  | 0.18807300  |
| C | 0.96724700  | 4.20105000  | 1.21197200  |
| H | 0.22035400  | 4.98380900  | 1.06341500  |
| H | 0.78624700  | 3.69080400  | 2.16080500  |
| H | 1.94932100  | 4.67982300  | 1.23649300  |
| O | 1.06503100  | 3.64503400  | -1.53004500 |
| C | 2.49759800  | -3.16381400 | 0.03126700  |
| C | 1.33498300  | -2.84382700 | -0.70900900 |
| C | 0.56395500  | -3.80970900 | -1.34441800 |
| C | 0.94581900  | -5.13713400 | -1.17518800 |

|   |             |             |             |
|---|-------------|-------------|-------------|
| C | 2.06476600  | -5.48461700 | -0.40012700 |
| C | 2.84786100  | -4.51190400 | 0.20058300  |
| C | 3.07607100  | -1.93551700 | 0.45542600  |
| C | 2.29394600  | -0.89893900 | -0.00709400 |
| H | -0.30884700 | -3.54841900 | -1.93451500 |
| H | 0.36385400  | -5.91948600 | -1.65327500 |
| H | 2.32599200  | -6.53167200 | -0.28602400 |
| H | 3.72520500  | -4.78253300 | 0.78005900  |
| H | 3.95142300  | -1.80685400 | 1.07743400  |
| C | 0.46827300  | -0.80019200 | -1.70507800 |
| N | 1.08276152  | 0.09285238  | -2.45847691 |
| C | 0.36091504  | 0.63011434  | -3.44727960 |
| C | -0.92673341 | 0.19174456  | -3.75173890 |
| C | -1.49460732 | -0.72748412 | -2.88744352 |
| N | -0.82507076 | -1.18671969 | -1.81148760 |
| H | 0.84334271  | 1.41880462  | -4.01873868 |
| H | -1.47881407 | 0.58130855  | -4.59780547 |
| H | -2.51555641 | -1.08151223 | -3.00507874 |
| N | 1.18725000  | -1.44705700 | -0.68791800 |
| C | -1.36287125 | -2.56248533 | 1.88622080  |
| C | -1.62308725 | -1.29724333 | 2.47872580  |
| C | -2.94358725 | -0.85819333 | 2.03430080  |
| C | -3.44934025 | -1.83837733 | 1.13461380  |
| C | -2.46653625 | -2.87069333 | 1.02698280  |
| C | -2.62422925 | -4.08893433 | 0.18756180  |
| H | -1.70808325 | -4.68096533 | 0.14525580  |
| H | -3.41867425 | -4.72871733 | 0.58880680  |

|                        |             |             |                             |
|------------------------|-------------|-------------|-----------------------------|
| H                      | -2.91615825 | -3.84256233 | -0.84021020                 |
| C                      | -0.20548125 | -3.43661933 | 2.22163880                  |
| H                      | 0.72178875  | -2.86666633 | 2.33018680                  |
| H                      | -0.38395125 | -3.93591733 | 3.18142580                  |
| H                      | -0.03059425 | -4.21571133 | 1.47639780                  |
| C                      | -0.76874925 | -0.59809333 | 3.47644880                  |
| H                      | -0.91678625 | 0.48487167  | 3.44585580                  |
| H                      | -0.99700325 | -0.93388233 | 4.49510380                  |
| H                      | 0.29381975  | -0.79226333 | 3.30207680                  |
| C                      | -3.68262725 | 0.29630867  | 2.60424080                  |
| H                      | -4.45994925 | 0.67102367  | 1.93393280                  |
| H                      | -4.16944825 | -0.01261933 | 3.53714880                  |
| H                      | -3.02095525 | 1.13214367  | 2.84446480                  |
| C                      | -4.78005025 | -1.83575133 | 0.46378280                  |
| H                      | -5.48389925 | -2.50149833 | 0.97687680                  |
| H                      | -5.22757025 | -0.83827533 | 0.45265080                  |
| H                      | -4.71840525 | -2.18699733 | -0.57236920                 |
| Co                     | -1.57389000 | -0.88291700 | 0.24078800                  |
| C                      | 7.78692700  | 2.72024400  | 0.61424600                  |
| H                      | 8.55525500  | 2.01899600  | 0.28180500                  |
| H                      | 7.86827800  | 3.61295300  | -0.01610100                 |
| H                      | 8.02695800  | 3.03394000  | 1.63373100                  |
| C                      | -5.99391600 | 4.32760800  | -0.60301400                 |
| H                      | -6.25669200 | 4.89427300  | 0.29441000                  |
| H                      | -5.81419200 | 5.06256100  | -1.39550800                 |
| H                      | -6.86368900 | 3.73745800  | -0.89993000                 |
| Zero-point correction= |             |             | 0.704316 (Hartree/Particle) |

|                                              |              |
|----------------------------------------------|--------------|
| Thermal correction to Energy=                | 0.749205     |
| Thermal correction to Enthalpy=              | 0.750149     |
| Thermal correction to Gibbs Free Energy=     | 0.625958     |
| Sum of electronic and zero-point Energies=   | -2312.116987 |
| Sum of electronic and thermal Energies=      | -2312.072099 |
| Sum of electronic and thermal Enthalpies=    | -2312.071154 |
| Sum of electronic and thermal Free Energies= | -2312.195345 |

E(RM06L) = -2312.821303 A.U.

**(S)C-7**

1 1

Number of imaginary frequencies: 0

|   |             |            |             |
|---|-------------|------------|-------------|
| C | -2.05070500 | 0.67117700 | 0.36708100  |
| C | -3.25636500 | 1.52961100 | 0.30710700  |
| C | -4.24169400 | 1.37230600 | -0.67907500 |
| C | -3.37059500 | 2.62693900 | 1.18552300  |
| C | -5.28993200 | 2.27656200 | -0.78378300 |
| H | -4.15209500 | 0.56251600 | -1.39978500 |
| C | -4.43182000 | 3.52641900 | 1.07356800  |
| H | -2.67509600 | 2.71487900 | 2.01633500  |
| C | -5.40764800 | 3.37081200 | 0.08909500  |
| H | -6.02843200 | 2.14588500 | -1.57139200 |
| H | -4.50541700 | 4.35339500 | 1.77498200  |
| C | -0.82464100 | 1.31897000 | 0.17688000  |
| P | -0.94185900 | 3.08096000 | -0.17708500 |
| C | 1.78075500  | 0.85350700 | 0.06185700  |
| C | 3.01368200  | 1.47664200 | 0.44708700  |
| C | 3.06189400  | 2.79754000 | 0.94179400  |

|   |             |             |             |
|---|-------------|-------------|-------------|
| C | 4.21990700  | 0.75757000  | 0.36570500  |
| C | 4.26927200  | 3.35394300  | 1.32925400  |
| H | 2.14357800  | 3.37204600  | 1.00898500  |
| C | 5.42269800  | 1.32608000  | 0.75662000  |
| H | 4.18564700  | -0.25955300 | -0.02118500 |
| C | 5.47233700  | 2.63693800  | 1.24485800  |
| H | 4.28705600  | 4.37379100  | 1.70734300  |
| H | 6.34297200  | 0.75072400  | 0.68395200  |
| C | 0.48451400  | 0.83387900  | 0.05654900  |
| C | -1.70509700 | 3.49260800  | -1.77038500 |
| H | -0.91755100 | 3.62520500  | -2.51628000 |
| H | -2.40947300 | 2.72283700  | -2.08642800 |
| H | -2.23462400 | 4.44217700  | -1.66243200 |
| O | 0.16824800  | 4.00117200  | 0.21044900  |
| C | -3.17756100 | -2.81695000 | 0.60844100  |
| C | -1.79893300 | -2.93481400 | 0.90098500  |
| C | -1.20874900 | -4.15231600 | 1.22836000  |
| C | -2.02218400 | -5.27852800 | 1.19664100  |
| C | -3.38602200 | -5.19215500 | 0.86257000  |
| C | -3.97433500 | -3.97423000 | 0.57237300  |
| C | -3.43647200 | -1.43914100 | 0.42622200  |
| C | -2.24543400 | -0.73542900 | 0.56172000  |
| H | -0.15590200 | -4.22491500 | 1.48777800  |
| H | -1.59409400 | -6.24720300 | 1.43481200  |
| H | -3.98404300 | -6.09738700 | 0.84473000  |
| H | -5.03131900 | -3.90746800 | 0.33323900  |
| H | -4.39375900 | -0.99831500 | 0.19093600  |

|   |             |             |             |
|---|-------------|-------------|-------------|
| C | -0.08968000 | -1.46341000 | 1.67126600  |
| N | -0.31970000 | -1.25199800 | 2.95759500  |
| C | 0.75190000  | -1.24914200 | 3.75857500  |
| C | 2.03350800  | -1.51759500 | 3.28923600  |
| C | 2.17455000  | -1.67163200 | 1.91822800  |
| N | 1.11611700  | -1.61354200 | 1.09429800  |
| H | 0.56592300  | -1.03556800 | 4.80864600  |
| H | 2.89089300  | -1.55553100 | 3.94994600  |
| H | 3.14336000  | -1.79779400 | 1.44180600  |
| N | -1.21651300 | -1.66602300 | 0.82728700  |
| C | 0.26625300  | -1.72611300 | -2.34745200 |
| C | 0.85335100  | -0.46057700 | -2.69424500 |
| C | 2.28070200  | -0.54292300 | -2.51281300 |
| C | 2.57777500  | -1.83504900 | -1.98745000 |
| C | 1.32623600  | -2.55069900 | -1.87416900 |
| C | 1.20743800  | -3.94648200 | -1.37235400 |
| H | 0.18775600  | -4.18828200 | -1.06259000 |
| H | 1.49409900  | -4.66072100 | -2.15290400 |
| H | 1.86934900  | -4.12744500 | -0.51893400 |
| C | -1.17214200 | -2.08623300 | -2.46499600 |
| H | -1.82522700 | -1.25456700 | -2.17773000 |
| H | -1.43018000 | -2.35728800 | -3.49586500 |
| H | -1.43267000 | -2.93807100 | -1.83024700 |
| C | 0.12020200  | 0.73122900  | -3.19805300 |
| H | 0.61184700  | 1.65779200  | -2.88365500 |
| H | 0.07576400  | 0.74151900  | -4.29349000 |
| H | -0.91082900 | 0.74932200  | -2.82782200 |

|                                              |              |             |                             |
|----------------------------------------------|--------------|-------------|-----------------------------|
| C                                            | 3.24847700   | 0.53067600  | -2.86555200                 |
| H                                            | 4.21833700   | 0.38617700  | -2.38441400                 |
| H                                            | 3.41549800   | 0.55334900  | -3.94862800                 |
| H                                            | 2.88653600   | 1.52044800  | -2.57154400                 |
| C                                            | 3.92068900   | -2.41669800 | -1.71360200                 |
| H                                            | 4.21937000   | -3.11159000 | -2.50815000                 |
| H                                            | 4.69636000   | -1.64869700 | -1.65354300                 |
| H                                            | 3.94031000   | -2.98909400 | -0.77963200                 |
| Co                                           | 1.25578700   | -0.82382400 | -0.74945500                 |
| C                                            | -6.55886100  | 4.31811300  | -0.02622600                 |
| H                                            | -7.48432800  | 3.85508500  | 0.33210200                  |
| H                                            | -6.39920800  | 5.22499300  | 0.56009200                  |
| H                                            | -6.73780100  | 4.61036500  | -1.06473500                 |
| C                                            | 6.76550300   | 3.26408300  | 1.65747100                  |
| H                                            | 7.03069300   | 4.09646300  | 0.99686700                  |
| H                                            | 6.70566700   | 3.67883500  | 2.66844600                  |
| H                                            | 7.59074100   | 2.54916600  | 1.63465200                  |
| Zero-point correction=                       |              |             | 0.703418 (Hartree/Particle) |
| Thermal correction to Energy=                |              |             | 0.749770                    |
| Thermal correction to Enthalpy=              |              |             | 0.750714                    |
| Thermal correction to Gibbs Free Energy=     |              |             | 0.621765                    |
| Sum of electronic and zero-point Energies=   |              |             | -2312.102810                |
| Sum of electronic and thermal Energies=      |              |             | -2312.056458                |
| Sum of electronic and thermal Enthalpies=    |              |             | -2312.055514                |
| Sum of electronic and thermal Free Energies= |              |             | -2312.184463                |
| E(RM06L) =                                   | -2312.806228 | A.U.        |                             |

**(T)C-7**

Number of imaginary frequencies: 0

|   |             |             |             |
|---|-------------|-------------|-------------|
| C | -2.11007900 | -0.62252400 | -0.36918600 |
| C | -3.44270300 | -1.27881700 | -0.35459800 |
| C | -4.38099400 | -1.00372500 | 0.64792600  |
| C | -3.75259900 | -2.25455600 | -1.30927900 |
| C | -5.58710300 | -1.69127100 | 0.69691800  |
| H | -4.14173300 | -0.27383600 | 1.41960600  |
| C | -4.96331200 | -2.93667800 | -1.25589300 |
| H | -3.03658800 | -2.47519300 | -2.09741100 |
| C | -5.90295600 | -2.66938400 | -0.25416500 |
| H | -6.29475500 | -1.47690500 | 1.49440600  |
| H | -5.18543400 | -3.69159600 | -2.00631000 |
| C | -0.99691800 | -1.38537800 | -0.06711000 |
| P | -1.09486100 | -3.17936000 | 0.33662900  |
| C | 1.60644800  | -1.06706100 | -0.09361600 |
| C | 2.87333500  | -1.63053600 | -0.43347000 |
| C | 2.96791200  | -3.00618000 | -0.72934400 |
| C | 4.04279200  | -0.85490100 | -0.47148000 |
| C | 4.19371900  | -3.55797900 | -1.06167300 |
| H | 2.07587700  | -3.61985700 | -0.65549800 |
| C | 5.26348500  | -1.42316800 | -0.80713600 |
| H | 3.97834100  | 0.19748800  | -0.20972800 |
| C | 5.36360000  | -2.78488900 | -1.11192100 |
| H | 4.25270900  | -4.62182600 | -1.27998200 |
| H | 6.15911300  | -0.80600500 | -0.82568600 |
| C | 0.34675200  | -0.94482700 | -0.04797100 |

|   |             |             |             |
|---|-------------|-------------|-------------|
| C | -2.39663900 | -3.47818700 | 1.58934600  |
| H | -2.40933200 | -2.68274600 | 2.33988000  |
| H | -3.38944500 | -3.56737200 | 1.14552900  |
| H | -2.12829000 | -4.41895800 | 2.07382300  |
| O | 0.25458900  | -3.68248700 | 0.81442900  |
| C | -2.69314100 | 2.99978600  | -0.60241700 |
| C | -1.30402400 | 2.92884900  | -0.83233800 |
| C | -0.52718800 | 4.05595200  | -1.06200700 |
| C | -1.16470300 | 5.29218300  | -0.98605800 |
| C | -2.53656200 | 5.39026600  | -0.70909100 |
| C | -3.31154800 | 4.25561900  | -0.52263100 |
| C | -3.16471700 | 1.66340600  | -0.48922700 |
| C | -2.09949800 | 0.79509300  | -0.61911900 |
| H | 0.53601000  | 3.98473200  | -1.27151600 |
| H | -0.58576300 | 6.19671600  | -1.14428100 |
| H | -2.99726800 | 6.37121900  | -0.65391600 |
| H | -4.37707800 | 4.33328800  | -0.32951500 |
| H | -4.17999900 | 1.36143200  | -0.27562400 |
| C | 0.08621200  | 1.25874000  | -1.78210900 |
| N | -0.26600800 | 0.92272900  | -3.00616800 |
| C | 0.73791700  | 0.80091800  | -3.88616900 |
| C | 2.05935200  | 1.07861000  | -3.55479100 |
| C | 2.32631200  | 1.37651300  | -2.22536000 |
| N | 1.34134700  | 1.43299100  | -1.31762900 |
| H | 0.45990500  | 0.48769400  | -4.88959100 |
| H | 2.85570200  | 1.02397400  | -4.28667300 |
| H | 3.33579700  | 1.53924200  | -1.85980900 |

|    |             |             |             |
|----|-------------|-------------|-------------|
| N  | -0.91401300 | 1.56389600  | -0.81535100 |
| C  | 0.37435100  | 1.78645900  | 2.34425400  |
| C  | 0.70080900  | 0.43035300  | 2.61518300  |
| C  | 2.14123800  | 0.26016300  | 2.44046600  |
| C  | 2.67141200  | 1.48949600  | 1.99321200  |
| C  | 1.56913700  | 2.42421800  | 1.88017300  |
| C  | 1.73296800  | 3.85282500  | 1.49872400  |
| H  | 0.78057000  | 4.33328000  | 1.26573500  |
| H  | 2.19517600  | 4.41444700  | 2.31923200  |
| H  | 2.39026500  | 3.96733400  | 0.63007200  |
| C  | -0.98037500 | 2.39353000  | 2.44798900  |
| H  | -1.75684400 | 1.72818200  | 2.05316800  |
| H  | -1.23383400 | 2.59551000  | 3.49471500  |
| H  | -1.04984300 | 3.34030700  | 1.90612800  |
| C  | -0.22325100 | -0.62713400 | 3.10501200  |
| H  | 0.07204300  | -1.61758500 | 2.74206000  |
| H  | -0.22430800 | -0.66717700 | 4.20073300  |
| H  | -1.25243400 | -0.43796500 | 2.78225600  |
| C  | 2.87305300  | -0.99200800 | 2.76361200  |
| H  | 3.87260300  | -1.01272500 | 2.32366400  |
| H  | 2.98212500  | -1.09026700 | 3.85002900  |
| H  | 2.33668600  | -1.87935100 | 2.41097200  |
| C  | 4.10095200  | 1.84308000  | 1.77129800  |
| H  | 4.46084300  | 2.50923400  | 2.56419200  |
| H  | 4.74579000  | 0.96128700  | 1.77035600  |
| H  | 4.25555300  | 2.37643600  | 0.82621800  |
| Co | 1.17327700  | 0.79876200  | 0.63355900  |

|                                              |              |             |                             |
|----------------------------------------------|--------------|-------------|-----------------------------|
| C                                            | -7.21498300  | -3.38796000 | -0.21507500                 |
| H                                            | -7.96866400  | -2.85949000 | -0.80923800                 |
| H                                            | -7.13690500  | -4.39716000 | -0.62640300                 |
| H                                            | -7.60665100  | -3.46312900 | 0.80214200                  |
| C                                            | 6.67496500   | -3.40710600 | -1.47124200                 |
| H                                            | 6.92334700   | -4.23171700 | -0.79575400                 |
| H                                            | 6.65152700   | -3.83045400 | -2.48068400                 |
| H                                            | 7.49305400   | -2.68482400 | -1.43202600                 |
| Zero-point correction=                       |              |             | 0.704228 (Hartree/Particle) |
| Thermal correction to Energy=                |              |             | 0.750014                    |
| Thermal correction to Enthalpy=              |              |             | 0.750958                    |
| Thermal correction to Gibbs Free Energy=     |              |             | 0.624933                    |
| Sum of electronic and zero-point Energies=   |              |             | -2312.114813                |
| Sum of electronic and thermal Energies=      |              |             | -2312.069028                |
| Sum of electronic and thermal Enthalpies=    |              |             | -2312.068083                |
| Sum of electronic and thermal Free Energies= |              |             | -2312.194108                |
| E(RM06L) =                                   | -2312.819041 | A.U.        |                             |

**(S)C-8**

1 1

Number of imaginary frequencies: 0

|   |            |             |             |
|---|------------|-------------|-------------|
| C | 1.67469400 | -0.14106500 | -0.89199700 |
| C | 3.07895000 | -0.47063200 | -1.11586400 |
| C | 3.49889800 | -1.76162700 | -1.48426500 |
| C | 4.06974900 | 0.51173400  | -0.94023900 |
| C | 4.84280200 | -2.04556600 | -1.65997100 |
| H | 2.77723700 | -2.56575100 | -1.58570400 |
| C | 5.41421900 | 0.21676900  | -1.11820700 |

|   |             |             |             |
|---|-------------|-------------|-------------|
| H | 3.78478600  | 1.52395100  | -0.65957700 |
| C | 5.83039200  | -1.06605200 | -1.48504900 |
| H | 5.13968600  | -3.05638100 | -1.93013900 |
| H | 6.15672700  | 0.99806400  | -0.97449400 |
| C | 0.57808100  | -0.93118100 | -1.07443200 |
| P | 0.20177100  | -2.71566000 | -0.99906300 |
| C | -1.21315400 | -1.87849600 | -0.22477100 |
| C | -2.30636300 | -2.35646000 | 0.57268200  |
| C | -2.96596900 | -1.50849700 | 1.47950300  |
| C | -2.74692100 | -3.69035500 | 0.47710100  |
| C | -4.04509800 | -1.96095200 | 2.22286900  |
| H | -2.59538700 | -0.49156700 | 1.60267400  |
| C | -3.82652800 | -4.13496700 | 1.22180000  |
| H | -2.23855300 | -4.37406100 | -0.19936600 |
| C | -4.49934700 | -3.28179400 | 2.10883300  |
| H | -4.53866100 | -1.28938700 | 2.92304200  |
| H | -4.15783700 | -5.16593100 | 1.12427700  |
| C | -0.75297400 | -0.61604200 | -0.56226200 |
| C | -0.30331500 | -3.27869800 | -2.65235800 |
| H | -0.84988800 | -4.22095500 | -2.57047600 |
| H | -0.92825400 | -2.54321600 | -3.16496700 |
| H | 0.59178200  | -3.46349400 | -3.25126000 |
| O | 1.08020400  | -3.69954200 | -0.29330500 |
| C | 0.47894000  | 3.03791300  | 0.66785000  |
| C | 1.27688300  | 2.44798500  | 1.66691300  |
| C | 1.50344200  | 3.03406300  | 2.90490600  |
| C | 0.92184000  | 4.27884200  | 3.12746000  |

|   |             |             |             |
|---|-------------|-------------|-------------|
| C | 0.15894200  | 4.90968100  | 2.13887100  |
| C | -0.06673800 | 4.29913700  | 0.90970300  |
| C | 0.44792500  | 2.11457600  | -0.46962500 |
| C | 1.33297700  | 1.05807200  | -0.12293800 |
| H | 2.13630500  | 2.55890600  | 3.64491700  |
| H | 1.08392400  | 4.77662300  | 4.07794700  |
| H | -0.25500700 | 5.89452300  | 2.33137600  |
| H | -0.65020100 | 4.80538900  | 0.14713100  |
| H | 0.46344800  | 2.46373900  | -1.49946400 |
| C | 2.47795500  | 0.23826500  | 1.89725700  |
| N | 3.50073700  | 0.68387400  | 2.61528300  |
| C | 4.20495400  | -0.27666400 | 3.22861600  |
| C | 3.90129000  | -1.62649900 | 3.09580900  |
| C | 2.77267900  | -1.94540700 | 2.34598100  |
| N | 2.03147500  | -1.00343400 | 1.75560800  |
| H | 5.04443900  | 0.05937800  | 3.83341000  |
| H | 4.50350500  | -2.39204700 | 3.57061600  |
| H | 2.43574400  | -2.97000000 | 2.20218400  |
| N | 1.75983100  | 1.22660000  | 1.15420900  |
| C | -3.10463700 | 0.53863300  | -1.76194300 |
| C | -3.53294200 | 1.39703500  | -0.71917600 |
| C | -2.93094300 | 2.70693800  | -0.90932700 |
| C | -2.11397600 | 2.64948400  | -2.04763500 |
| C | -2.13017800 | 1.27852400  | -2.53459900 |
| C | -1.38892600 | 0.77513900  | -3.71754400 |
| H | -1.28326700 | -0.31195800 | -3.68924700 |
| H | -1.91342300 | 1.03386200  | -4.64561400 |

|    |             |             |             |
|----|-------------|-------------|-------------|
| H  | -0.38413000 | 1.20264600  | -3.78355000 |
| C  | -3.62368600 | -0.81805200 | -2.06886500 |
| H  | -4.01708900 | -1.31913100 | -1.18194200 |
| H  | -4.43883400 | -0.73834500 | -2.79736400 |
| H  | -2.85784000 | -1.46531200 | -2.50265800 |
| C  | -4.54941200 | 1.11788000  | 0.32669300  |
| H  | -4.21728300 | 1.43757300  | 1.32010400  |
| H  | -5.46194200 | 1.68577400  | 0.10665800  |
| H  | -4.81413200 | 0.06167300  | 0.38106100  |
| C  | -3.24129900 | 3.88310400  | -0.05377500 |
| H  | -2.79547100 | 4.80080500  | -0.44122100 |
| H  | -4.32457100 | 4.03974800  | -0.00705400 |
| H  | -2.89474200 | 3.75303400  | 0.97730400  |
| C  | -1.36035800 | 3.76632900  | -2.67480400 |
| H  | -1.98789500 | 4.25859600  | -3.42636700 |
| H  | -1.05878600 | 4.52989300  | -1.95387700 |
| H  | -0.46397900 | 3.42285200  | -3.19807400 |
| Co | -1.45575500 | 1.16313300  | -0.68005500 |
| C  | 7.27538300  | -1.38322000 | -1.70399300 |
| H  | 7.54486900  | -2.35457600 | -1.27974900 |
| H  | 7.51092100  | -1.43323200 | -2.77298000 |
| H  | 7.92881500  | -0.62630600 | -1.26426700 |
| C  | -5.63525900 | -3.78343300 | 2.94138900  |
| H  | -6.27138900 | -4.47519400 | 2.38282700  |
| H  | -5.26855600 | -4.33191700 | 3.81634000  |
| H  | -6.26002800 | -2.96758100 | 3.31214900  |

Zero-point correction=

0.704952 (Hartree/Particle)

|                                              |              |
|----------------------------------------------|--------------|
| Thermal correction to Energy=                | 0.750794     |
| Thermal correction to Enthalpy=              | 0.751738     |
| Thermal correction to Gibbs Free Energy=     | 0.624781     |
| Sum of electronic and zero-point Energies=   | -2312.123908 |
| Sum of electronic and thermal Energies=      | -2312.078066 |
| Sum of electronic and thermal Enthalpies=    | -2312.077122 |
| Sum of electronic and thermal Free Energies= | -2312.204080 |

E(RM06L) = -2312.828860 A.U.

**(T)C-8**

1 3

Number of imaginary frequencies: 0

|   |             |             |             |
|---|-------------|-------------|-------------|
| C | 1.69738900  | -0.15891100 | -0.90871900 |
| C | 3.10397800  | -0.47976300 | -1.12884000 |
| C | 3.53236000  | -1.76947800 | -1.49309800 |
| C | 4.08937700  | 0.50932900  | -0.95658500 |
| C | 4.87780100  | -2.04711300 | -1.66442900 |
| H | 2.81599100  | -2.57734300 | -1.59848500 |
| C | 5.43543300  | 0.22080000  | -1.12996700 |
| H | 3.79933800  | 1.52209700  | -0.68433400 |
| C | 5.85963600  | -1.06165000 | -1.48995500 |
| H | 5.18055000  | -3.05676700 | -1.93202300 |
| H | 6.17311300  | 1.00715700  | -0.98960500 |
| C | 0.61171500  | -0.96631000 | -1.09320200 |
| P | 0.25876000  | -2.75745900 | -0.98263900 |
| C | -1.17047200 | -1.93064400 | -0.21525700 |
| C | -2.26675100 | -2.39360000 | 0.58566900  |
| C | -2.92839700 | -1.52559800 | 1.47319200  |

|   |             |             |             |
|---|-------------|-------------|-------------|
| C | -2.71277000 | -3.72589300 | 0.50818100  |
| C | -4.01461700 | -1.96107800 | 2.21634800  |
| H | -2.55813200 | -0.50617100 | 1.58243300  |
| C | -3.80051600 | -4.15244900 | 1.25169400  |
| H | -2.20449100 | -4.42234600 | -0.15508000 |
| C | -4.47500300 | -3.28133200 | 2.11971700  |
| H | -4.50964100 | -1.27530100 | 2.90129800  |
| H | -4.13740900 | -5.18272000 | 1.16775400  |
| C | -0.71519200 | -0.67813200 | -0.57652700 |
| C | -0.25776200 | -3.36305300 | -2.61598100 |
| H | -0.76490700 | -4.32413500 | -2.50528100 |
| H | -0.92223900 | -2.65938100 | -3.12244800 |
| H | 0.63052200  | -3.52322800 | -3.23168900 |
| O | 1.15774700  | -3.70711200 | -0.25769000 |
| C | 0.51918400  | 3.06902800  | 0.56443700  |
| C | 1.31459900  | 2.50215000  | 1.58154200  |
| C | 1.53636400  | 3.12375200  | 2.80407400  |
| C | 0.95900900  | 4.37623600  | 2.98661700  |
| C | 0.20250200  | 4.98382900  | 1.97700100  |
| C | -0.02207700 | 4.34115000  | 0.76541900  |
| C | 0.48554400  | 2.11455300  | -0.54003400 |
| C | 1.35128600  | 1.05669300  | -0.16534400 |
| H | 2.16375200  | 2.66810300  | 3.56078300  |
| H | 1.12020000  | 4.90104500  | 3.92263500  |
| H | -0.20559500 | 5.97628300  | 2.14024800  |
| H | -0.59930300 | 4.82768900  | -0.01476700 |
| H | 0.43653600  | 2.40916900  | -1.58492600 |

|   |             |             |             |
|---|-------------|-------------|-------------|
| C | 2.50776300  | 0.29880700  | 1.87426200  |
| N | 3.52046200  | 0.76492600  | 2.59379200  |
| C | 4.22530300  | -0.17855400 | 3.23212600  |
| C | 3.93317100  | -1.53299700 | 3.12170300  |
| C | 2.81479900  | -1.87428000 | 2.36657900  |
| N | 2.07244000  | -0.94908000 | 1.75151600  |
| H | 5.05624500  | 0.17511000  | 3.83862800  |
| H | 4.53621300  | -2.28494100 | 3.61670000  |
| H | 2.48731300  | -2.90403300 | 2.23847200  |
| N | 1.79166400  | 1.26730300  | 1.10541500  |
| C | -3.19907400 | 0.51614500  | -1.61070300 |
| C | -3.61308000 | 1.46157700  | -0.60495900 |
| C | -2.99517800 | 2.69837800  | -0.90391000 |
| C | -2.21168200 | 2.54526600  | -2.10644700 |
| C | -2.33030900 | 1.20617000  | -2.54443800 |
| C | -1.70402300 | 0.59332700  | -3.74666500 |
| H | -1.46575100 | -0.46057900 | -3.57522000 |
| H | -2.36997300 | 0.63885500  | -4.61599000 |
| H | -0.77292700 | 1.09574300  | -4.02413100 |
| C | -3.78077100 | -0.83146500 | -1.83757300 |
| H | -4.20753000 | -1.26295900 | -0.93010400 |
| H | -4.58593500 | -0.75273100 | -2.57821500 |
| H | -3.04638800 | -1.53897500 | -2.23233900 |
| C | -4.61992400 | 1.24412800  | 0.47115700  |
| H | -4.29560400 | 1.65642500  | 1.43211900  |
| H | -5.56259300 | 1.74256400  | 0.21547500  |
| H | -4.83859200 | 0.18520300  | 0.61927100  |

|                                              |              |             |                             |
|----------------------------------------------|--------------|-------------|-----------------------------|
| C                                            | -3.21894400  | 3.95909700  | -0.14288400                 |
| H                                            | -2.77808500  | 4.82307200  | -0.64454400                 |
| H                                            | -4.29226800  | 4.15199500  | -0.04072600                 |
| H                                            | -2.80833200  | 3.92029300  | 0.87243500                  |
| C                                            | -1.46650200  | 3.63372200  | -2.79527500                 |
| H                                            | -2.14631600  | 4.23837100  | -3.40583200                 |
| H                                            | -0.97800800  | 4.31813900  | -2.09511300                 |
| H                                            | -0.70016400  | 3.24291500  | -3.47013200                 |
| Co                                           | -1.45340200  | 1.12175000  | -0.57391700                 |
| C                                            | 7.30644800   | -1.37113700 | -1.70551400                 |
| H                                            | 7.57702500   | -2.34690200 | -1.29252000                 |
| H                                            | 7.54646300   | -1.40668500 | -2.77410200                 |
| H                                            | 7.95526500   | -0.61728800 | -1.25396200                 |
| C                                            | -5.62048800  | -3.76277800 | 2.95086800                  |
| H                                            | -6.25050300  | -4.46726500 | 2.40158200                  |
| H                                            | -5.26339700  | -4.29034600 | 3.84246700                  |
| H                                            | -6.24869000  | -2.93817800 | 3.29538500                  |
| Zero-point correction=                       |              |             | 0.704413 (Hartree/Particle) |
| Thermal correction to Energy=                |              |             | 0.750602                    |
| Thermal correction to Enthalpy=              |              |             | 0.751547                    |
| Thermal correction to Gibbs Free Energy=     |              |             | 0.622546                    |
| Sum of electronic and zero-point Energies=   |              |             | -2312.127848                |
| Sum of electronic and thermal Energies=      |              |             | -2312.081658                |
| Sum of electronic and thermal Enthalpies=    |              |             | -2312.080714                |
| Sum of electronic and thermal Free Energies= |              |             | -2312.209715                |
| E(RM06L) =                                   | -2312.832261 | A.U.        |                             |

**C-TS<sub>a1</sub>**

Number of imaginary frequencies: 1

|   |             |             |             |
|---|-------------|-------------|-------------|
| C | -0.62007300 | -1.16478400 | -1.81770800 |
| C | -1.23377300 | -2.11782800 | -0.91625100 |
| C | -2.51358800 | -1.61765000 | -0.55882200 |
| C | -2.72186800 | -0.36102600 | -1.24168300 |
| C | -1.57400900 | -0.12302000 | -2.05813100 |
| O | -0.36411900 | 0.15495800  | 2.94786500  |
| O | -2.12080600 | 0.18553000  | 1.55350900  |
| C | -1.59378300 | 0.31642700  | 2.70927800  |
| C | -3.47843800 | -2.24132500 | 0.37907500  |
| H | -4.28840000 | -2.72320600 | -0.18011200 |
| H | -3.00858100 | -3.00513900 | 1.00188500  |
| H | -3.93015500 | -1.49317100 | 1.03513300  |
| C | -0.66983900 | -3.42920300 | -0.50221200 |
| H | -0.83042400 | -3.63154400 | 0.56023500  |
| H | -1.16123100 | -4.23497700 | -1.05901600 |
| H | 0.40044900  | -3.49398200 | -0.70417200 |
| C | 0.70703600  | -1.30408400 | -2.47358700 |
| H | 1.41855600  | -1.83491300 | -1.83553600 |
| H | 0.62216700  | -1.86400500 | -3.41159800 |
| H | 1.14459100  | -0.33180800 | -2.71755800 |
| C | -1.35878000 | 1.04093000  | -2.95495400 |
| H | -0.31470400 | 1.36703800  | -2.96606600 |
| H | -1.61915500 | 0.76759900  | -3.98333000 |
| H | -1.98134600 | 1.89690200  | -2.68331000 |
| C | -3.94218500 | 0.47776600  | -1.11447000 |

|   |             |             |             |
|---|-------------|-------------|-------------|
| H | -3.81946300 | 1.45772000  | -1.58236100 |
| H | -4.80118200 | -0.00262300 | -1.59547200 |
| H | -4.20213300 | 0.62953900  | -0.06212400 |
| C | 4.10549800  | 0.75070300  | -0.20653700 |
| C | 2.96027300  | 0.06119000  | 0.18602700  |
| C | 2.99700000  | -1.29595000 | 0.60466700  |
| C | 4.22555500  | -1.97555700 | 0.63744100  |
| C | 5.36508600  | -1.29726000 | 0.24364400  |
| C | 5.30169800  | 0.04471800  | -0.17243400 |
| H | 4.06241400  | 1.78902100  | -0.50957400 |
| H | 4.27401800  | -3.00987600 | 0.96383200  |
| H | 6.32535800  | -1.80227700 | 0.25865000  |
| H | 6.21595400  | 0.54878300  | -0.46983700 |
| C | 0.80216800  | -0.61078100 | 0.73890400  |
| H | 0.19102200  | -0.27751500 | 1.81640800  |
| C | 1.66669500  | -1.68076800 | 0.92857700  |
| H | 1.37470800  | -2.63595500 | 1.34659000  |
| N | 1.63187400  | 0.45998200  | 0.26157400  |
| C | 1.03982600  | 1.65264300  | -0.03605300 |
| N | -0.31764400 | 1.57820000  | -0.05764600 |
| C | -0.99287800 | 2.72671600  | -0.19072700 |
| C | -0.33220600 | 3.92954300  | -0.38084500 |
| C | 1.05958700  | 3.87185800  | -0.45349000 |
| N | 1.75513000  | 2.74894200  | -0.27063100 |
| H | -2.07718800 | 2.64622300  | -0.15732500 |
| H | -0.87493300 | 4.85929400  | -0.49249000 |
| H | 1.64605600  | 4.76445300  | -0.65972700 |

|                                              |              |             |                             |
|----------------------------------------------|--------------|-------------|-----------------------------|
| Co                                           | -1.05337900  | -0.25122600 | -0.04085900                 |
| C                                            | -2.49879700  | 0.66818700  | 3.84915500                  |
| H                                            | -2.56106300  | -0.18365900 | 4.53092000                  |
| H                                            | -2.07259200  | 1.49501400  | 4.41969000                  |
| H                                            | -3.49886400  | 0.92374800  | 3.50219500                  |
| Zero-point correction=                       |              |             | 0.459749 (Hartree/Particle) |
| Thermal correction to Energy=                |              |             | 0.489245                    |
| Thermal correction to Enthalpy=              |              |             | 0.490189                    |
| Thermal correction to Gibbs Free Energy=     |              |             | 0.400155                    |
| Sum of electronic and zero-point Energies=   |              |             | -1390.738562                |
| Sum of electronic and thermal Energies=      |              |             | -1390.709065                |
| Sum of electronic and thermal Enthalpies=    |              |             | -1390.708121                |
| Sum of electronic and thermal Free Energies= |              |             | -1390.798155                |
| E(RM06L) =                                   | -1391.198310 | A.U.        |                             |

### C-TSb1

1 1

Number of imaginary frequencies: 1

|   |            |             |             |
|---|------------|-------------|-------------|
| C | 2.04282400 | 1.17575600  | -1.40256100 |
| C | 2.98506600 | 0.10787200  | -1.14660900 |
| C | 2.39352700 | -1.12372200 | -1.57396700 |
| C | 1.06176300 | -0.83728500 | -2.00405400 |
| C | 0.84894700 | 0.59563100  | -1.92471100 |
| O | 2.00711100 | 0.22228500  | 2.83740700  |
| O | 1.99689600 | -1.38468500 | 1.26513400  |
| C | 2.35769700 | -0.92053700 | 2.39642500  |
| C | 3.01192600 | -2.46558600 | -1.43896300 |
| H | 3.80155400 | -2.59777700 | -2.18613500 |

|   |             |             |             |
|---|-------------|-------------|-------------|
| H | 3.46378300  | -2.59577900 | -0.45182100 |
| H | 2.28431400  | -3.26629600 | -1.58106500 |
| C | 4.32677400  | 0.26409400  | -0.53009800 |
| H | 4.66462600  | -0.66676600 | -0.06830400 |
| H | 5.07142500  | 0.54432600  | -1.28398000 |
| H | 4.33404200  | 1.04694400  | 0.23402200  |
| C | 2.28862700  | 2.61201300  | -1.12815200 |
| H | 2.82404700  | 2.75980600  | -0.18574900 |
| H | 2.91261200  | 3.04099100  | -1.92084100 |
| H | 1.36003000  | 3.18432000  | -1.08748100 |
| C | -0.38000900 | 1.31038000  | -2.35195200 |
| H | -0.46664800 | 2.29605000  | -1.88861400 |
| H | -0.37325300 | 1.45235200  | -3.43859400 |
| H | -1.28612900 | 0.74808200  | -2.10797100 |
| C | 0.04265100  | -1.82980400 | -2.42628900 |
| H | -0.97177500 | -1.47015200 | -2.23802300 |
| H | 0.12554300  | -2.02623900 | -3.50190800 |
| H | 0.16155700  | -2.78424200 | -1.90811000 |
| C | -3.07768100 | 2.24009600  | 0.19862200  |
| C | -2.02914600 | 1.38281000  | 0.53620500  |
| C | -0.74089800 | 1.87737100  | 0.87407700  |
| C | -0.51034800 | 3.25869100  | 0.88935200  |
| C | -1.55035200 | 4.11389400  | 0.56225500  |
| C | -2.81264600 | 3.60390600  | 0.21846400  |
| H | -4.05586300 | 1.85587500  | -0.05346000 |
| H | 0.46352700  | 3.64530900  | 1.17657000  |
| H | -1.39562500 | 5.18797300  | 0.58116000  |

|                                            |             |             |                             |
|--------------------------------------------|-------------|-------------|-----------------------------|
| H                                          | -3.61285800 | 4.29409300  | -0.03016000                 |
| H                                          | 1.20103000  | 0.62494800  | 2.03181300                  |
| C                                          | 0.12273900  | 0.75629000  | 1.13223100                  |
| N                                          | -1.95612500 | -0.01916400 | 0.57126900                  |
| C                                          | -2.97157200 | -0.96173100 | 0.32697800                  |
| N                                          | -2.58430700 | -2.23938300 | 0.39474000                  |
| C                                          | -3.54698100 | -3.13742600 | 0.17902200                  |
| C                                          | -4.85945100 | -2.77694300 | -0.10854000                 |
| C                                          | -5.12198000 | -1.41437800 | -0.16976800                 |
| N                                          | -4.18361700 | -0.48745000 | 0.04739000                  |
| H                                          | -3.24750100 | -4.18198300 | 0.23829700                  |
| H                                          | -5.63139200 | -3.51704800 | -0.27944700                 |
| H                                          | -6.11712600 | -1.03895700 | -0.39919700                 |
| Co                                         | 1.28241400  | -0.18526600 | -0.11117000                 |
| C                                          | -0.67513400 | -0.38334200 | 0.96278200                  |
| H                                          | -0.49450400 | -1.42269100 | 1.20364900                  |
| C                                          | 3.26891800  | -1.74572400 | 3.24168800                  |
| H                                          | 3.27167500  | -2.78385500 | 2.91277800                  |
| H                                          | 4.28454200  | -1.34804800 | 3.15309000                  |
| H                                          | 2.98789600  | -1.67183100 | 4.29233000                  |
| Zero-point correction=                     |             |             | 0.459502 (Hartree/Particle) |
| Thermal correction to Energy=              |             |             | 0.489243                    |
| Thermal correction to Enthalpy=            |             |             | 0.490188                    |
| Thermal correction to Gibbs Free Energy=   |             |             | 0.399140                    |
| Sum of electronic and zero-point Energies= |             |             | -1390.699147                |
| Sum of electronic and thermal Energies=    |             |             | -1390.669406                |
| Sum of electronic and thermal Enthalpies=  |             |             | -1390.668462                |

Sum of electronic and thermal Free Energies= -1390.759509

E(RM06L) = -1391.158649 A.U.

### C-TSc1

1 1

Number of imaginary frequencies: 1

|   |             |             |             |
|---|-------------|-------------|-------------|
| C | -1.07755800 | -2.12163900 | -1.05334300 |
| C | -2.27678500 | -1.34404300 | -1.06256600 |
| C | -2.00284000 | -0.09153200 | -1.69255000 |
| C | -0.63368400 | -0.12937800 | -2.15054400 |
| C | -0.06459300 | -1.37498000 | -1.76515600 |
| O | -1.99285300 | -0.16486800 | 1.41083400  |
| O | -0.36751500 | 0.15601800  | 2.91483400  |
| C | -1.58877500 | 0.08782000  | 2.59586100  |
| C | -2.98530000 | 0.99976800  | -1.92861900 |
| H | -3.56999100 | 0.80772700  | -2.83549800 |
| H | -3.69839500 | 1.08814300  | -1.10354400 |
| H | -2.49940700 | 1.96999200  | -2.06412200 |
| C | -3.56598300 | -1.74074800 | -0.44899600 |
| H | -3.42647700 | -2.46238700 | 0.35796700  |
| H | -4.10584000 | -0.88277600 | -0.04446400 |
| H | -4.20441000 | -2.21023800 | -1.20633300 |
| C | -0.95740000 | -3.51798600 | -0.55610700 |
| H | -1.45053800 | -3.65264900 | 0.41086900  |
| H | -1.43380800 | -4.21208300 | -1.25805500 |
| H | 0.08542300  | -3.82169000 | -0.44710800 |
| C | 1.29643200  | -1.86225100 | -2.10365400 |
| H | 1.72686400  | -2.46923200 | -1.30246600 |

|   |             |             |             |
|---|-------------|-------------|-------------|
| H | 1.24985200  | -2.48939800 | -3.00127200 |
| H | 1.98770700  | -1.04263500 | -2.31482000 |
| C | 0.05480800  | 0.95462200  | -2.89891300 |
| H | 1.13561500  | 0.94903400  | -2.73321300 |
| H | -0.10669400 | 0.82956400  | -3.97538300 |
| H | -0.32795000 | 1.94483500  | -2.63425700 |
| C | 0.97787600  | -0.88713100 | 0.94652000  |
| C | 2.08344700  | -0.17306600 | 0.45797400  |
| C | 3.39704200  | -0.68231900 | 0.37612900  |
| C | 3.62945300  | -1.99246800 | 0.80736000  |
| C | 2.56545400  | -2.73622200 | 1.31591000  |
| C | 1.27846700  | -2.19627300 | 1.37884800  |
| H | 0.27271000  | -0.29947700 | 1.87830000  |
| H | 4.62705200  | -2.41920700 | 0.75929200  |
| H | 2.74239700  | -3.74443400 | 1.67807300  |
| H | 0.47854600  | -2.79247500 | 1.81374900  |
| C | 3.44553600  | 1.44003100  | -0.39142400 |
| H | 3.67056500  | 2.42681200  | -0.76339100 |
| C | 4.22886000  | 0.35367600  | -0.17157600 |
| H | 5.28918300  | 0.29624300  | -0.37090800 |
| N | 2.12394300  | 1.13578300  | -0.02734900 |
| C | 1.09224200  | 2.04804800  | -0.00585600 |
| N | 1.41908900  | 3.32906400  | -0.17569200 |
| C | 0.43827500  | 4.22063800  | -0.07944400 |
| C | -0.87449700 | 3.86259700  | 0.22568500  |
| C | -1.13048400 | 2.50816100  | 0.32873800  |
| N | -0.16676900 | 1.58144400  | 0.17235600  |

|                                              |              |             |                             |
|----------------------------------------------|--------------|-------------|-----------------------------|
| H                                            | 0.71883900   | 5.25880700  | -0.24364900                 |
| H                                            | -1.66091400  | 4.59613500  | 0.34945400                  |
| H                                            | -2.12425900  | 2.11334400  | 0.52344700                  |
| Co                                           | -0.73309200  | -0.33600300 | -0.08455800                 |
| C                                            | -2.62023000  | 0.33902500  | 3.64934200                  |
| H                                            | -2.58344000  | 1.39177800  | 3.94249600                  |
| H                                            | -3.62115100  | 0.10095200  | 3.29264400                  |
| H                                            | -2.38745700  | -0.24196400 | 4.54299500                  |
| Zero-point correction=                       |              |             | 0.460441 (Hartree/Particle) |
| Thermal correction to Energy=                |              |             | 0.489427                    |
| Thermal correction to Enthalpy=              |              |             | 0.490371                    |
| Thermal correction to Gibbs Free Energy=     |              |             | 0.403224                    |
| Sum of electronic and zero-point Energies=   |              |             | -1390.732797                |
| Sum of electronic and thermal Energies=      |              |             | -1390.703811                |
| Sum of electronic and thermal Enthalpies=    |              |             | -1390.702867                |
| Sum of electronic and thermal Free Energies= |              |             | -1390.790014                |
| E(RM06L) =                                   | -1391.193238 | A.U.        |                             |

### C-TS<sub>a</sub>2

1 1

Number of imaginary frequencies: 1

|   |             |             |             |
|---|-------------|-------------|-------------|
| C | -3.82186600 | -1.02229400 | -1.07281200 |
| C | -5.10855200 | -0.61778400 | -0.65045900 |
| C | -5.64724000 | 0.60639400  | -1.08623000 |
| C | -5.85924500 | -1.41798600 | 0.23011000  |
| C | -6.90101400 | 1.00771700  | -0.65290800 |
| H | -5.07059500 | 1.23012400  | -1.76340700 |
| C | -7.11132000 | -1.00106800 | 0.65171200  |

|   |             |             |             |
|---|-------------|-------------|-------------|
| H | -5.44788100 | -2.36374400 | 0.57096300  |
| C | -7.65848700 | 0.21362000  | 0.21751100  |
| H | -7.30873400 | 1.95480500  | -0.99774800 |
| H | -7.68296500 | -1.62863900 | 1.33089100  |
| C | -2.70124800 | -1.35848300 | -1.42993500 |
| P | -1.03497300 | -1.73675000 | -1.76928700 |
| C | 0.11364300  | 0.52136500  | -0.28750800 |
| C | -0.55341000 | 1.80509800  | -0.19499200 |
| C | 0.03463200  | 3.01732900  | -0.58967600 |
| C | -1.90392600 | 1.80575300  | 0.19267600  |
| C | -0.70841300 | 4.18604700  | -0.58725500 |
| H | 1.06980800  | 3.03335700  | -0.91605000 |
| C | -2.63307100 | 2.98780500  | 0.20719900  |
| H | -2.37473900 | 0.86529600  | 0.47151800  |
| C | -2.05074000 | 4.19900600  | -0.17835400 |
| H | -0.24312700 | 5.11366900  | -0.91162200 |
| H | -3.67434400 | 2.96922500  | 0.52097200  |
| C | -0.13993700 | -0.69065300 | -0.64025400 |
| C | -0.69706600 | -0.99045400 | -3.38002600 |
| H | -0.97974000 | 0.06518000  | -3.38530900 |
| H | 0.37070600  | -1.07671100 | -3.59913200 |
| H | -1.25969900 | -1.51977600 | -4.15167400 |
| O | -0.65733600 | -3.18195200 | -1.63904500 |
| C | 3.32671900  | 2.59536600  | 0.65809400  |
| C | 3.85796800  | 1.83664300  | -0.41451800 |
| C | 4.97313800  | 2.24233500  | -1.14050000 |
| C | 5.55952200  | 3.44822300  | -0.76847600 |

|   |             |             |             |
|---|-------------|-------------|-------------|
| C | 5.04876900  | 4.22182500  | 0.28439700  |
| C | 3.93561700  | 3.80967000  | 1.00183800  |
| C | 2.19231200  | 1.89173100  | 1.16968200  |
| C | 2.02190100  | 0.72681900  | 0.45800000  |
| H | 5.35851500  | 1.64691900  | -1.95818600 |
| H | 6.43131300  | 3.79852400  | -1.31201900 |
| H | 5.53444700  | 5.15865800  | 0.53898200  |
| H | 3.54305400  | 4.41082500  | 1.81669400  |
| H | 1.52315900  | 2.25194100  | 1.94052900  |
| C | 3.22465700  | -0.43257200 | -1.27022400 |
| N | 4.11191200  | -0.47032700 | -2.26193000 |
| C | 4.16393600  | -1.60743200 | -2.95548300 |
| C | 3.32423600  | -2.69052600 | -2.70537600 |
| C | 2.43521500  | -2.56352600 | -1.64902500 |
| N | 2.40607200  | -1.45111300 | -0.89840400 |
| H | 4.90161900  | -1.64141500 | -3.75460600 |
| H | 3.35374500  | -3.59237800 | -3.30337300 |
| H | 1.70575500  | -3.32885100 | -1.39934000 |
| N | 3.05372100  | 0.69568000  | -0.52381600 |
| C | 1.89466100  | -1.14190100 | 2.68126500  |
| C | 0.46252800  | -1.00388200 | 2.57217300  |
| C | -0.04507600 | -2.16463900 | 1.89104700  |
| C | 1.06191800  | -2.96744300 | 1.50001800  |
| C | 2.26620000  | -2.31847200 | 1.98341100  |
| C | 3.65628200  | -2.80967500 | 1.79528900  |
| H | 4.37067100  | -1.98305100 | 1.74079200  |
| H | 3.95971800  | -3.44663400 | 2.63371900  |

|                        |             |             |                             |
|------------------------|-------------|-------------|-----------------------------|
| H                      | 3.75930700  | -3.40619200 | 0.88491000                  |
| C                      | 2.82720500  | -0.24581900 | 3.41144400                  |
| H                      | 3.12284400  | -0.71406800 | 4.35696800                  |
| H                      | 3.74001800  | -0.04992800 | 2.84192600                  |
| H                      | 2.37441500  | 0.71805600  | 3.64813700                  |
| C                      | -0.36735100 | 0.07781700  | 3.16430100                  |
| H                      | -1.21883500 | 0.33096100  | 2.52619600                  |
| H                      | -0.77081300 | -0.23089400 | 4.13554500                  |
| H                      | 0.20817500  | 0.99202500  | 3.32775700                  |
| C                      | -1.47817000 | -2.46170300 | 1.63546100                  |
| H                      | -1.60369400 | -3.13274000 | 0.78171500                  |
| H                      | -1.92343800 | -2.94322700 | 2.51387300                  |
| H                      | -2.05343100 | -1.55089800 | 1.44037700                  |
| C                      | 0.98646500  | -4.30778400 | 0.86014800                  |
| H                      | 0.69546900  | -5.05643800 | 1.60618400                  |
| H                      | 0.24921300  | -4.33165600 | 0.05283000                  |
| H                      | 1.95407700  | -4.62385000 | 0.46210700                  |
| Co                     | 1.24702700  | -1.05635900 | 0.68440000                  |
| C                      | -2.82722600 | 5.47671800  | -0.15611600                 |
| H                      | -2.43045000 | 6.16815900  | 0.59461800                  |
| H                      | -2.76992400 | 5.99630700  | -1.11731400                 |
| H                      | -3.88100900 | 5.30842700  | 0.07492800                  |
| C                      | -9.02579200 | 0.63572700  | 0.65109200                  |
| H                      | -9.24434700 | 0.31539500  | 1.67286700                  |
| H                      | -9.15358800 | 1.71923300  | 0.59642700                  |
| H                      | -9.79329400 | 0.18943800  | 0.00881500                  |
| Zero-point correction= |             |             | 0.703239 (Hartree/Particle) |

|                                              |              |
|----------------------------------------------|--------------|
| Thermal correction to Energy=                | 0.749212     |
| Thermal correction to Enthalpy=              | 0.750156     |
| Thermal correction to Gibbs Free Energy=     | 0.621141     |
| Sum of electronic and zero-point Energies=   | -2312.107506 |
| Sum of electronic and thermal Energies=      | -2312.061534 |
| Sum of electronic and thermal Enthalpies=    | -2312.060590 |
| Sum of electronic and thermal Free Energies= | -2312.189605 |

E(RM06L) = -2312.810746 A.U.

### C-TS<sub>a</sub>3

1 1

Number of imaginary frequencies: 1

|   |             |            |             |
|---|-------------|------------|-------------|
| C | -1.77720800 | 0.82909900 | 0.43839000  |
| C | -1.85491700 | 2.11171100 | 1.22315000  |
| C | -1.81004200 | 2.12856800 | 2.61764600  |
| C | -1.98237100 | 3.33672300 | 0.55085200  |
| C | -1.86228400 | 3.33288500 | 3.31337600  |
| H | -1.72461000 | 1.19591100 | 3.16318800  |
| C | -2.02779500 | 4.53353300 | 1.24745800  |
| H | -2.02057000 | 3.34810200 | -0.53647000 |
| C | -1.96134700 | 4.55506400 | 2.64640000  |
| H | -1.81701200 | 3.31983600 | 4.39974500  |
| H | -2.09385400 | 5.47143300 | 0.69873200  |
| C | -0.55266100 | 0.17630700 | 0.28293400  |
| P | 0.89665500  | 0.90651600 | 1.18438500  |
| C | 1.11818800  | 3.74928200 | 0.33555200  |
| C | 1.12057100  | 5.12622800 | 0.00773900  |
| C | 1.11447900  | 6.09994300 | 1.02275800  |

|   |             |             |             |
|---|-------------|-------------|-------------|
| C | 1.06570200  | 5.54526400  | -1.33185500 |
| C | 1.05531200  | 7.44566300  | 0.69766400  |
| H | 1.14272200  | 5.78045900  | 2.06074500  |
| C | 1.00670800  | 6.89676000  | -1.64048700 |
| H | 1.06483900  | 4.79984100  | -2.12363200 |
| C | 1.00238600  | 7.87151800  | -0.63650600 |
| H | 1.04761800  | 8.18759200  | 1.49322600  |
| H | 0.96104100  | 7.20734200  | -2.68163300 |
| C | 1.04656900  | 2.55784800  | 0.59771200  |
| C | 2.45286600  | 0.12467800  | 0.67613600  |
| H | 3.23390300  | 0.88870100  | 0.69926000  |
| H | 2.68208800  | -0.62756900 | 1.43266400  |
| H | 2.44189800  | -0.36120300 | -0.29641900 |
| O | 0.81062800  | 0.86423800  | 2.68688800  |
| C | -5.14659600 | 0.94960800  | -1.02314900 |
| C | -4.71975500 | -0.28997500 | -1.53349000 |
| C | -5.47916600 | -0.99254700 | -2.46738900 |
| C | -6.68321700 | -0.42878100 | -2.86711300 |
| C | -7.13225600 | 0.80040000  | -2.35267000 |
| C | -6.37200600 | 1.49965300  | -1.43444300 |
| C | -4.12650300 | 1.40868200  | -0.16262700 |
| C | -3.05236700 | 0.52705500  | -0.17666900 |
| H | -5.15601400 | -1.94438700 | -2.87321000 |
| H | -7.29094900 | -0.95274100 | -3.59826100 |
| H | -8.08189800 | 1.20301700  | -2.68988300 |
| H | -6.70166400 | 2.45710400  | -1.04292400 |
| H | -4.14795800 | 2.33238700  | 0.39242100  |

|   |             |             |             |
|---|-------------|-------------|-------------|
| C | -3.06953200 | -1.92362100 | -0.94340200 |
| N | -4.07195500 | -2.78609900 | -0.75707700 |
| C | -3.81663100 | -4.08130700 | -0.91112600 |
| C | -2.54912900 | -4.54867700 | -1.23760100 |
| C | -1.54432800 | -3.59893000 | -1.29695700 |
| N | -1.78946600 | -2.27924500 | -1.15328500 |
| H | -4.65646400 | -4.75634000 | -0.75422500 |
| H | -2.32896000 | -5.59804900 | -1.39223800 |
| H | -0.50294900 | -3.88385400 | -1.44787500 |
| N | -3.44215700 | -0.57517600 | -1.01174200 |
| C | -0.27065800 | 0.47958500  | -2.77438900 |
| C | 1.11082900  | 0.19802200  | -2.47457300 |
| C | 1.36930000  | -1.16861200 | -2.81721900 |
| C | 0.16516400  | -1.74214600 | -3.29393500 |
| C | -0.84376800 | -0.69910400 | -3.30450700 |
| C | -2.19943700 | -0.84716800 | -3.89365000 |
| H | -2.87830200 | -0.04576800 | -3.59617600 |
| H | -2.12187400 | -0.82518600 | -4.98719300 |
| H | -2.66674400 | -1.80527300 | -3.63929300 |
| C | -0.90916700 | 1.81453700  | -2.63873000 |
| H | -0.49283000 | 2.35971200  | -1.78477200 |
| H | -0.73335100 | 2.42181100  | -3.53537600 |
| H | -1.99258300 | 1.74181800  | -2.49906700 |
| C | 2.15580700  | 1.23932400  | -2.27283000 |
| H | 3.12366000  | 0.81270700  | -2.00335400 |
| H | 2.29602800  | 1.77662200  | -3.21990800 |
| H | 1.89070100  | 1.98515900  | -1.52116400 |

|    |             |             |             |
|----|-------------|-------------|-------------|
| C  | 2.69745700  | -1.83329100 | -2.80585200 |
| H  | 2.61726000  | -2.90279800 | -2.59428400 |
| H  | 3.16457300  | -1.72175700 | -3.79254700 |
| H  | 3.37727800  | -1.39038900 | -2.07400100 |
| C  | 0.02744100  | -3.09723900 | -3.89332800 |
| H  | 0.35209700  | -3.07969200 | -4.94117800 |
| H  | 0.64158000  | -3.83514300 | -3.36864600 |
| H  | -1.00960000 | -3.44619900 | -3.89440200 |
| Co | -0.17572500 | -1.05968600 | -1.31630700 |
| C  | -2.01444100 | 5.84974500  | 3.39600300  |
| H  | -1.52144100 | 5.77538700  | 4.36862900  |
| H  | -1.53983300 | 6.65888800  | 2.83262300  |
| H  | -3.04870600 | 6.15966400  | 3.58407200  |
| C  | 0.96509700  | 9.32862000  | -0.97401300 |
| H  | 0.60104300  | 9.50142400  | -1.98938100 |
| H  | 0.32734800  | 9.88771800  | -0.28386700 |
| H  | 1.96433300  | 9.77354900  | -0.90861800 |
| C  | -0.15270200 | -1.77882900 | 1.06041900  |
| C  | -1.02069100 | -2.07565200 | 2.15619800  |
| C  | -1.84367500 | -3.21637100 | 2.05411200  |
| C  | -1.06541200 | -1.33135500 | 3.35763600  |
| C  | -2.68528000 | -3.60409400 | 3.08332700  |
| H  | -1.80230500 | -3.82052100 | 1.15390000  |
| C  | -1.89381200 | -1.71688300 | 4.38775500  |
| H  | -0.41398800 | -0.46593400 | 3.45485400  |
| C  | -2.72125700 | -2.84661500 | 4.26261200  |
| H  | -3.30147500 | -4.48887300 | 2.96702800  |

|   |             |             |             |
|---|-------------|-------------|-------------|
| H | -1.92395500 | -1.16017800 | 5.31884000  |
| C | 0.63893500  | -2.19410400 | 0.12093100  |
| P | 1.70267900  | -3.64402700 | 0.08844500  |
| C | 4.46761100  | -2.59692100 | 0.22062100  |
| C | 5.76553400  | -2.04352700 | 0.20483600  |
| C | 6.27465500  | -1.35945900 | 1.32136800  |
| C | 6.57255700  | -2.15392200 | -0.94807600 |
| C | 7.54442300  | -0.80272100 | 1.29866800  |
| H | 5.66204900  | -1.26764100 | 2.21354700  |
| C | 7.83584300  | -1.60243700 | -0.97567600 |
| H | 6.19057800  | -2.68576700 | -1.81475000 |
| C | 8.33415700  | -0.92286700 | 0.14741400  |
| H | 7.91424600  | -0.28148800 | 2.17409300  |
| H | 8.46880200  | -1.68361500 | -1.85280400 |
| C | 3.33265200  | -3.05244900 | 0.20234100  |
| C | 1.43686200  | -4.51447100 | 1.65087200  |
| H | 2.14488500  | -5.34295900 | 1.71632200  |
| H | 1.58528900  | -3.84686400 | 2.50360500  |
| H | 0.42095900  | -4.91485700 | 1.68562700  |
| O | 1.42449400  | -4.46908500 | -1.14139800 |
| C | -4.35415900 | -4.25466900 | 5.24268400  |
| H | -4.89037200 | -4.29084600 | 6.18901000  |
| H | -5.07098800 | -4.15465600 | 4.41986600  |
| H | -3.77846000 | -5.17820500 | 5.11388200  |
| C | 10.13170900 | 0.26007500  | 1.13487900  |
| H | 9.53754000  | 1.14301500  | 1.39825600  |
| H | 10.20750000 | -0.39774200 | 2.00842700  |

|                                              |              |             |                             |
|----------------------------------------------|--------------|-------------|-----------------------------|
| H                                            | 11.12881500  | 0.57295400  | 0.83007300                  |
| O                                            | 9.57882300   | -0.42223700 | 0.02029200                  |
| O                                            | -3.49979900  | -3.12212100 | 5.32151600                  |
| Zero-point correction=                       |              |             | 1.018794 (Hartree/Particle) |
| Thermal correction to Energy=                |              |             | 1.086784                    |
| Thermal correction to Enthalpy=              |              |             | 1.087728                    |
| Thermal correction to Gibbs Free Energy=     |              |             | 0.913499                    |
| Sum of electronic and zero-point Energies=   |              |             | -3612.873568                |
| Sum of electronic and thermal Energies=      |              |             | -3612.805578                |
| Sum of electronic and thermal Enthalpies=    |              |             | -3612.804634                |
| Sum of electronic and thermal Free Energies= |              |             | -3612.978864                |
| E(RM06L) =                                   | -3613.892362 | A.U.        |                             |

### C-TSb3

1 1

Number of imaginary frequencies: 1

|   |            |            |             |
|---|------------|------------|-------------|
| C | 1.69841300 | 0.89693000 | -0.24813100 |
| C | 2.58864700 | 2.09246700 | -0.29460500 |
| C | 2.56210200 | 3.03852900 | 0.73572300  |
| C | 3.42820600 | 2.32684200 | -1.39125700 |
| C | 3.33330100 | 4.19307600 | 0.66482700  |
| H | 1.94216800 | 2.84982700 | 1.61194100  |
| C | 4.18329900 | 3.48762500 | -1.46325400 |
| H | 3.46293900 | 1.60335000 | -2.20134800 |
| C | 4.14790200 | 4.44605900 | -0.44202100 |
| H | 3.31052800 | 4.90822800 | 1.48408300  |
| H | 4.81123400 | 3.66212400 | -2.33372300 |
| C | 0.36904800 | 1.17739000 | 0.00627800  |

|   |             |             |             |
|---|-------------|-------------|-------------|
| P | -0.32585600 | 2.74361800  | -0.49180100 |
| C | -2.30633600 | 0.47472100  | -0.31785000 |
| C | -3.73162400 | 0.51012600  | -0.54972900 |
| C | -4.36921100 | 1.75014600  | -0.75614100 |
| C | -4.52330800 | -0.64736900 | -0.57952300 |
| C | -5.73505500 | 1.81694600  | -0.96855300 |
| H | -3.77493000 | 2.66049900  | -0.73842900 |
| C | -5.89153200 | -0.57303800 | -0.80568200 |
| H | -4.05410300 | -1.61567100 | -0.43094500 |
| C | -6.52602000 | 0.65811000  | -0.99943400 |
| H | -6.20576700 | 2.78579000  | -1.11757700 |
| H | -6.48280100 | -1.48516500 | -0.83118900 |
| C | -1.32446600 | 1.30520700  | -0.52345300 |
| C | -0.90363800 | 3.83820600  | 0.82800100  |
| H | -1.60001400 | 4.55669500  | 0.39039100  |
| H | -1.39943800 | 3.28758900  | 1.62831600  |
| H | -0.05265600 | 4.39388800  | 1.22986100  |
| O | 0.12132900  | 3.45966400  | -1.71977800 |
| C | 4.13181300  | -1.83827300 | -0.05990200 |
| C | 2.99222300  | -2.56269900 | -0.46696900 |
| C | 3.01421900  | -3.94948700 | -0.60003100 |
| C | 4.20797100  | -4.59942100 | -0.31367600 |
| C | 5.35268700  | -3.89424500 | 0.09354000  |
| C | 5.32623400  | -2.51749000 | 0.22654900  |
| C | 3.75770900  | -0.47218900 | -0.01152200 |
| C | 2.41952500  | -0.34960600 | -0.32601000 |
| H | 2.14408200  | -4.50661100 | -0.92731900 |

|   |             |             |             |
|---|-------------|-------------|-------------|
| H | 4.25431200  | -5.67957000 | -0.41019000 |
| H | 6.26592300  | -4.44055400 | 0.30615200  |
| H | 6.20640300  | -1.96767100 | 0.54531600  |
| H | 4.38396900  | 0.35687500  | 0.28540800  |
| C | 0.82705300  | -1.96326200 | -1.41336100 |
| N | 1.07656000  | -2.77838700 | -2.43757200 |
| C | 0.06657800  | -3.10494400 | -3.23608600 |
| C | -1.21258400 | -2.59562200 | -3.04720600 |
| C | -1.38753600 | -1.77456100 | -1.95039400 |
| N | -0.39009100 | -1.46555200 | -1.09413700 |
| H | 0.30119300  | -3.78044200 | -4.05630400 |
| H | -2.03869600 | -2.82891500 | -3.70721800 |
| H | -2.35811000 | -1.35345500 | -1.71868800 |
| N | 1.92263300  | -1.65525300 | -0.60610500 |
| C | 0.26743000  | -0.97182000 | 2.34517000  |
| C | -0.74832000 | 0.00739500  | 2.63473800  |
| C | -2.03001700 | -0.55785500 | 2.34595200  |
| C | -1.81124200 | -1.86367800 | 1.79802200  |
| C | -0.39088400 | -2.11766700 | 1.83795100  |
| C | 0.21803500  | -3.41799200 | 1.45963500  |
| H | 1.30747700  | -3.37838200 | 1.42255900  |
| H | -0.06134900 | -4.17902300 | 2.19745900  |
| H | -0.14933900 | -3.77980700 | 0.49221000  |
| C | 1.70552600  | -0.82197100 | 2.68396800  |
| H | 2.08547600  | 0.16924400  | 2.41731100  |
| H | 1.84762200  | -0.94205100 | 3.76466200  |
| H | 2.32988900  | -1.56764700 | 2.18542700  |

|                                            |             |             |                             |
|--------------------------------------------|-------------|-------------|-----------------------------|
| C                                          | -0.48458300 | 1.32081500  | 3.27630500                  |
| H                                          | -1.37943100 | 1.94445300  | 3.32578700                  |
| H                                          | -0.13803600 | 1.17114200  | 4.30540600                  |
| H                                          | 0.29987000  | 1.87675000  | 2.75200300                  |
| C                                          | -3.33573200 | 0.09495500  | 2.62831500                  |
| H                                          | -4.16158400 | -0.38331300 | 2.09834900                  |
| H                                          | -3.55117700 | 0.04635900  | 3.70149500                  |
| H                                          | -3.33563300 | 1.15188900  | 2.34406500                  |
| C                                          | -2.82756300 | -2.90153300 | 1.46933500                  |
| H                                          | -2.76961600 | -3.73077400 | 2.18406300                  |
| H                                          | -3.84419300 | -2.50710800 | 1.51378800                  |
| H                                          | -2.67379200 | -3.33659000 | 0.47522900                  |
| Co                                         | -0.87592400 | -0.45571900 | 0.61687500                  |
| C                                          | 4.95181200  | 5.70358100  | -0.54443600                 |
| H                                          | 4.52304400  | 6.38331100  | -1.28858300                 |
| H                                          | 4.98926100  | 6.24076400  | 0.40578300                  |
| H                                          | 5.97934000  | 5.50175900  | -0.86022500                 |
| C                                          | -7.99885100 | 0.74601800  | -1.23900000                 |
| H                                          | -8.48421400 | 1.39764900  | -0.50588600                 |
| H                                          | -8.21490200 | 1.17234100  | -2.22391400                 |
| H                                          | -8.47890100 | -0.23313500 | -1.18776200                 |
| Zero-point correction=                     |             |             | 0.704917 (Hartree/Particle) |
| Thermal correction to Energy=              |             |             | 0.749386                    |
| Thermal correction to Enthalpy=            |             |             | 0.750330                    |
| Thermal correction to Gibbs Free Energy=   |             |             | 0.628952                    |
| Sum of electronic and zero-point Energies= |             |             | -2312.093820                |
| Sum of electronic and thermal Energies=    |             |             | -2312.049351                |

Sum of electronic and thermal Enthalpies= -2312.048406

Sum of electronic and thermal Free Energies= -2312.169784

E(RM06L) = -2312.798736 A.U.

**(S)C-TS4**

1 1

Number of imaginary frequencies: 1

|   |             |             |             |
|---|-------------|-------------|-------------|
| C | 2.01586000  | 0.99797300  | -0.18659800 |
| C | 3.06401600  | 2.01797400  | -0.02994100 |
| C | 4.17059000  | 2.05544400  | -0.89428500 |
| C | 2.97097000  | 3.00495200  | 0.96510800  |
| C | 5.12192900  | 3.05732400  | -0.78219300 |
| H | 4.25825000  | 1.30621800  | -1.67618400 |
| C | 3.93466600  | 3.99983300  | 1.07636800  |
| H | 2.17506600  | 2.94556800  | 1.70548600  |
| C | 5.02223100  | 4.05303000  | 0.19931600  |
| H | 5.95910900  | 3.07732800  | -1.47569700 |
| H | 3.85462100  | 4.73868300  | 1.86992100  |
| C | 0.69445800  | 1.41287900  | -0.13313300 |
| P | -0.03716300 | 2.97984200  | -0.06445900 |
| C | -1.89528500 | 0.58403200  | -0.12112300 |
| C | -3.18458000 | 1.12976600  | -0.44696100 |
| C | -3.37898100 | 2.43981400  | -0.93720800 |
| C | -4.31849700 | 0.30453300  | -0.32289900 |
| C | -4.65096200 | 2.89295600  | -1.24479100 |
| H | -2.52922100 | 3.09239900  | -1.11279500 |
| C | -5.58594900 | 0.76618000  | -0.63834400 |
| H | -4.17087100 | -0.71398600 | 0.02575900  |

|   |             |             |             |
|---|-------------|-------------|-------------|
| C | -5.78115500 | 2.07496900  | -1.09645600 |
| H | -4.77562800 | 3.90454000  | -1.62412800 |
| H | -6.44356300 | 0.10551600  | -0.53352600 |
| C | -0.60642400 | 0.90105500  | -0.03488900 |
| C | -0.75312400 | 3.47253300  | 1.51405700  |
| H | -1.84449400 | 3.46801900  | 1.43277800  |
| H | -0.43601600 | 2.79317400  | 2.30632800  |
| H | -0.43272600 | 4.49107300  | 1.74503500  |
| O | -0.41861600 | 3.81000500  | -1.24255400 |
| C | 3.67042000  | -2.27161700 | -0.24678900 |
| C | 2.41075600  | -2.57836100 | -0.81630700 |
| C | 2.07722200  | -3.86027400 | -1.24958300 |
| C | 3.02392200  | -4.85733300 | -1.05754700 |
| C | 4.26795900  | -4.58524000 | -0.45669100 |
| C | 4.60302800  | -3.30578200 | -0.05313000 |
| C | 3.66811200  | -0.88299900 | 0.01804200  |
| C | 2.43786700  | -0.35931500 | -0.35882700 |
| H | 1.11965300  | -4.07397400 | -1.71817400 |
| H | 2.80008400  | -5.86952800 | -1.37956800 |
| H | 4.97605800  | -5.39591800 | -0.31952500 |
| H | 5.56816000  | -3.09789400 | 0.39861700  |
| H | 4.45330400  | -0.30728500 | 0.48803500  |
| C | 0.55189400  | -1.36906000 | -1.73686300 |
| N | 0.85331800  | -1.25201600 | -3.02238600 |
| C | -0.15727600 | -1.36963900 | -3.88841800 |
| C | -1.45660100 | -1.65017800 | -3.47797400 |
| C | -1.67739800 | -1.70990800 | -2.11193000 |

|   |             |             |             |
|---|-------------|-------------|-------------|
| N | -0.67756000 | -1.55024700 | -1.22528500 |
| H | 0.09213800  | -1.23999400 | -4.93901800 |
| H | -2.26826500 | -1.77772200 | -4.18381900 |
| H | -2.66754200 | -1.85285000 | -1.68645900 |
| N | 1.63856200  | -1.42107900 | -0.82763600 |
| C | -0.11573300 | -2.02867900 | 2.14486000  |
| C | -0.75119000 | -0.86104900 | 2.66095900  |
| C | -2.17265400 | -0.95348700 | 2.41982900  |
| C | -2.41923800 | -2.18282600 | 1.73190600  |
| C | -1.14122700 | -2.81703900 | 1.53623700  |
| C | -0.94967900 | -4.12309200 | 0.85020700  |
| H | 0.07972900  | -4.25817200 | 0.50789000  |
| H | -1.17969100 | -4.94995900 | 1.53220200  |
| H | -1.61363900 | -4.23223800 | -0.01342000 |
| C | 1.31836000  | -2.38499100 | 2.31651000  |
| H | 1.98120600  | -1.53404700 | 2.12917700  |
| H | 1.51093600  | -2.72251200 | 3.34225100  |
| H | 1.62495400  | -3.19520300 | 1.65021700  |
| C | -0.04937600 | 0.24033200  | 3.37498800  |
| H | -0.71579400 | 1.08258100  | 3.57728900  |
| H | 0.32890800  | -0.10808300 | 4.34290300  |
| H | 0.81813500  | 0.60487800  | 2.81043700  |
| C | -3.18409700 | 0.03094500  | 2.89327000  |
| H | -4.14016700 | -0.08163900 | 2.37711500  |
| H | -3.36980800 | -0.08843400 | 3.96674000  |
| H | -2.85321800 | 1.06257700  | 2.73418400  |
| C | -3.73386200 | -2.80855000 | 1.41310200  |

|                                              |              |             |                             |
|----------------------------------------------|--------------|-------------|-----------------------------|
| H                                            | -3.91710000  | -3.67463000 | 2.06046300                  |
| H                                            | -4.56606400  | -2.11699500 | 1.56528400                  |
| H                                            | -3.78793500  | -3.17629100 | 0.38224800                  |
| Co                                           | -1.14377300  | -0.94647200 | 0.65598500                  |
| C                                            | 6.04650600   | 5.13798800  | 0.29653000                  |
| H                                            | 5.97379700   | 5.68299300  | 1.23996500                  |
| H                                            | 7.06230800   | 4.74276000  | 0.20911300                  |
| H                                            | 5.92317400   | 5.86650500  | -0.51217300                 |
| C                                            | -7.14589500  | 2.58988800  | -1.42078000                 |
| H                                            | -7.48441200  | 3.30848900  | -0.66622300                 |
| H                                            | -7.15965200  | 3.11716600  | -2.37894700                 |
| H                                            | -7.88527800  | 1.78746800  | -1.46271800                 |
| Zero-point correction=                       |              |             | 0.703361 (Hartree/Particle) |
| Thermal correction to Energy=                |              |             | 0.749112                    |
| Thermal correction to Enthalpy=              |              |             | 0.750056                    |
| Thermal correction to Gibbs Free Energy=     |              |             | 0.623658                    |
| Sum of electronic and zero-point Energies=   |              |             | -2312.102456                |
| Sum of electronic and thermal Energies=      |              |             | -2312.056706                |
| Sum of electronic and thermal Enthalpies=    |              |             | -2312.055761                |
| Sum of electronic and thermal Free Energies= |              |             | -2312.182159                |
| E(RM06L) =                                   | -2312.805817 | A.U.        |                             |

**(T)C-TS4**

1 3

Number of imaginary frequencies: 1

|   |            |            |             |
|---|------------|------------|-------------|
| C | 2.26249400 | 0.66665400 | -0.05400700 |
| C | 3.55841400 | 1.33452400 | 0.09713600  |
| C | 4.57003200 | 1.17472200 | -0.86239700 |

|   |             |            |             |
|---|-------------|------------|-------------|
| C | 3.82101500  | 2.15584000 | 1.20738300  |
| C | 5.78406200  | 1.83258100 | -0.72589100 |
| H | 4.38232500  | 0.55083700 | -1.73222000 |
| C | 5.04015100  | 2.80311300 | 1.33900400  |
| H | 3.07847800  | 2.23452500 | 1.99983000  |
| C | 6.04261000  | 2.66376600 | 0.37031900  |
| H | 6.54851300  | 1.70670000 | -1.48862800 |
| H | 5.23117800  | 3.41437600 | 2.21765500  |
| C | 1.09537100  | 1.34392300 | 0.27288400  |
| P | 0.77641100  | 3.06943400 | 0.39153100  |
| C | -1.55078200 | 0.92934100 | 0.21589900  |
| C | -2.72587500 | 1.66323200 | -0.17946300 |
| C | -2.63404200 | 2.97946400 | -0.68171300 |
| C | -3.99516900 | 1.06292900 | -0.13785600 |
| C | -3.77221800 | 3.66023700 | -1.07943300 |
| H | -1.66072600 | 3.45306300 | -0.79430800 |
| C | -5.12822500 | 1.75170600 | -0.54434700 |
| H | -4.06671300 | 0.03841900 | 0.21556300  |
| C | -5.04333100 | 3.06824300 | -1.01204200 |
| H | -3.67836500 | 4.67260000 | -1.46546800 |
| H | -6.09958600 | 1.26421200 | -0.50111900 |
| C | -0.26758200 | 1.13523900 | 0.25730700  |
| C | -0.09888000 | 3.57397200 | 1.88950800  |
| H | -1.15985200 | 3.73453600 | 1.67326400  |
| H | 0.00928900  | 2.81259600 | 2.66403600  |
| H | 0.32658300  | 4.51626100 | 2.24107000  |
| O | 0.76123300  | 4.02187300 | -0.76203100 |

|   |             |             |             |
|---|-------------|-------------|-------------|
| C | 2.75737300  | -2.91551900 | -0.67378200 |
| C | 1.42352300  | -2.73055300 | -1.10568400 |
| C | 0.64844800  | -3.76989300 | -1.60552400 |
| C | 1.22195800  | -5.03738200 | -1.61638600 |
| C | 2.53002700  | -5.25495200 | -1.15157400 |
| C | 3.30616600  | -4.20751500 | -0.68368000 |
| C | 3.24937500  | -1.64206700 | -0.28511800 |
| C | 2.24941600  | -0.70515700 | -0.47007500 |
| H | -0.36789300 | -3.60865400 | -1.95209000 |
| H | 0.64274100  | -5.87614100 | -1.99017500 |
| H | 2.93845300  | -6.26009100 | -1.17141700 |
| H | 4.32184600  | -4.37586500 | -0.33919700 |
| H | 4.21144700  | -1.42348900 | 0.15816000  |
| C | 0.14508500  | -0.82135800 | -1.84072100 |
| N | 0.56834300  | -0.13744200 | -2.88675400 |
| C | -0.38347300 | 0.28019000  | -3.73245000 |
| C | -1.72633800 | -0.04489500 | -3.56676500 |
| C | -2.06793700 | -0.73468500 | -2.41289600 |
| N | -1.13538800 | -1.09742600 | -1.51762500 |
| H | -0.04599100 | 0.88175400  | -4.57285800 |
| H | -2.48112600 | 0.26529500  | -4.27882100 |
| H | -3.09866400 | -0.96286300 | -2.15311900 |
| N | 1.09333800  | -1.37076700 | -0.94272100 |
| C | -0.60437200 | -2.44105800 | 2.02112600  |
| C | -0.88844000 | -1.19964800 | 2.63607100  |
| C | -2.29031700 | -0.90480700 | 2.40989400  |
| C | -2.85944600 | -1.98734900 | 1.66602500  |

|    |             |             |             |
|----|-------------|-------------|-------------|
| C  | -1.80963900 | -2.91261300 | 1.38676000  |
| C  | -1.99155700 | -4.20176200 | 0.66330700  |
| H  | -1.04021900 | -4.63379600 | 0.34429000  |
| H  | -2.48946400 | -4.94229000 | 1.30089700  |
| H  | -2.61905900 | -4.08167900 | -0.22724400 |
| C  | 0.70781300  | -3.14337100 | 2.05606000  |
| H  | 1.54766200  | -2.45671500 | 1.90386500  |
| H  | 0.85902000  | -3.61915300 | 3.03190700  |
| H  | 0.77927400  | -3.92810600 | 1.29896500  |
| C  | 0.05944300  | -0.34684700 | 3.40411500  |
| H  | -0.17258000 | 0.71591600  | 3.27549200  |
| H  | 0.01469900  | -0.55475200 | 4.48002300  |
| H  | 1.09535100  | -0.50077100 | 3.08493100  |
| C  | -3.00585700 | 0.25518000  | 3.00700900  |
| H  | -3.99635200 | 0.40375300  | 2.57125900  |
| H  | -3.13645700 | 0.10971500  | 4.08573100  |
| H  | -2.44803500 | 1.18906000  | 2.87464900  |
| C  | -4.29447500 | -2.20386800 | 1.32147700  |
| H  | -4.69172200 | -3.07900500 | 1.84864800  |
| H  | -4.92005000 | -1.35353300 | 1.60464200  |
| H  | -4.44864700 | -2.39095100 | 0.25195100  |
| Co | -1.28022400 | -0.99575400 | 0.55495700  |
| C  | 7.34209700  | 3.39202500  | 0.49754600  |
| H  | 8.15676400  | 2.85862400  | 0.00228400  |
| H  | 7.28074800  | 4.38298200  | 0.03375900  |
| H  | 7.61973800  | 3.54737500  | 1.54289200  |
| C  | -6.26277700 | 3.82641300  | -1.42659200 |

|                                              |              |            |                             |
|----------------------------------------------|--------------|------------|-----------------------------|
| H                                            | -6.09915700  | 4.37700500 | -2.35719200                 |
| H                                            | -7.12380100  | 3.16925400 | -1.56535600                 |
| H                                            | -6.53856300  | 4.56934100 | -0.67000600                 |
| Zero-point correction=                       |              |            | 0.701893 (Hartree/Particle) |
| Thermal correction to Energy=                |              |            | 0.748326                    |
| Thermal correction to Enthalpy=              |              |            | 0.749270                    |
| Thermal correction to Gibbs Free Energy=     |              |            | 0.620233                    |
| Sum of electronic and zero-point Energies=   |              |            | -2312.091181                |
| Sum of electronic and thermal Energies=      |              |            | -2312.044749                |
| Sum of electronic and thermal Enthalpies=    |              |            | -2312.043804                |
| Sum of electronic and thermal Free Energies= |              |            | -2312.172842                |
| E(RM06L) =                                   | -2312.793074 | A.U.       |                             |

### (S)C-TS5

1 1

Number of imaginary frequencies: 1

|   |             |            |             |
|---|-------------|------------|-------------|
| C | -2.09711000 | 0.73606800 | 0.17069500  |
| C | -3.42642200 | 1.35624800 | 0.06745100  |
| C | -3.70735100 | 2.25630500 | -0.96975600 |
| C | -4.44251100 | 1.07403400 | 0.99244700  |
| C | -4.95493900 | 2.84895600 | -1.08029200 |
| H | -2.93453400 | 2.46847300 | -1.70657700 |
| C | -5.68453800 | 1.68237200 | 0.88615400  |
| H | -4.23907700 | 0.39242600 | 1.81494800  |
| C | -5.96526400 | 2.58160700 | -0.14945200 |
| H | -5.15361200 | 3.53595900 | -1.89924100 |
| H | -6.45335800 | 1.46512100 | 1.62391600  |
| C | -0.95084300 | 1.49307400 | -0.02426500 |

|   |             |             |             |
|---|-------------|-------------|-------------|
| P | -0.79246800 | 3.29865600  | 0.19109800  |
| C | 1.58877600  | 1.31008900  | 0.11189600  |
| C | 2.91171200  | 1.75486200  | 0.30697400  |
| C | 3.17702800  | 3.14079500  | 0.22560700  |
| C | 3.98573200  | 0.88949900  | 0.57775300  |
| C | 4.46014900  | 3.61949600  | 0.42495700  |
| H | 2.35464400  | 3.82187400  | 0.02314600  |
| C | 5.26996800  | 1.38376000  | 0.75039700  |
| H | 3.79694300  | -0.17732300 | 0.61434400  |
| C | 5.53504500  | 2.75672700  | 0.68519200  |
| H | 4.63988200  | 4.69021300  | 0.36788000  |
| H | 6.08821900  | 0.69285700  | 0.94157400  |
| C | 0.38398100  | 0.99430000  | -0.06280200 |
| C | -0.17729300 | 3.84186700  | -1.45907300 |
| H | 0.17541800  | 4.87262900  | -1.39293500 |
| H | 0.64620800  | 3.20506100  | -1.79464500 |
| H | -0.99416800 | 3.80798800  | -2.18773700 |
| O | -2.02827300 | 4.05539700  | 0.61821700  |
| C | -2.57274200 | -2.90927500 | 0.42469300  |
| C | -1.21297800 | -2.79185600 | 0.76187700  |
| C | -0.42547100 | -3.87270100 | 1.11716600  |
| C | -1.02070900 | -5.13385300 | 1.08195500  |
| C | -2.36235900 | -5.28475700 | 0.70619300  |
| C | -3.14742700 | -4.18696700 | 0.37951300  |
| C | -3.07047200 | -1.59827800 | 0.17284100  |
| C | -2.06795900 | -0.67930300 | 0.37225900  |
| H | 0.61671500  | -3.75256800 | 1.39730300  |

|   |             |             |             |
|---|-------------|-------------|-------------|
| H | -0.43459000 | -6.00660800 | 1.35171000  |
| H | -2.79715600 | -6.27904900 | 0.68276600  |
| H | -4.19026000 | -4.31065400 | 0.10464400  |
| H | -4.06588900 | -1.34087000 | -0.16104100 |
| C | -0.02849900 | -1.02822000 | 1.80825300  |
| N | -0.54807000 | -0.59289100 | 2.93023600  |
| C | 0.33968500  | -0.38796000 | 3.91687800  |
| C | 1.69409000  | -0.67236900 | 3.77461800  |
| C | 2.13390200  | -1.09582500 | 2.52602300  |
| N | 1.26854400  | -1.24260100 | 1.51335700  |
| H | -0.06205700 | 0.00038700  | 4.84909800  |
| H | 2.38950100  | -0.54276300 | 4.59466300  |
| H | 3.18013700  | -1.29852600 | 2.31925700  |
| N | -0.83857700 | -1.39527000 | 0.68295100  |
| C | 0.40706800  | -2.26001800 | -2.15110100 |
| C | 0.56868100  | -0.86740700 | -2.49015500 |
| C | 1.96286200  | -0.52597500 | -2.32622600 |
| C | 2.59077100  | -1.62829500 | -1.69371500 |
| C | 1.62194000  | -2.70704700 | -1.58227100 |
| C | 1.96160100  | -4.07656200 | -1.11276000 |
| H | 1.07529700  | -4.69806200 | -0.97439300 |
| H | 2.60935800  | -4.57709900 | -1.84253600 |
| H | 2.51279800  | -4.05872300 | -0.16626100 |
| C | -0.83370000 | -3.04670400 | -2.34971500 |
| H | -1.73177600 | -2.45316700 | -2.15768800 |
| H | -0.88906200 | -3.37534300 | -3.39469800 |
| H | -0.87257900 | -3.93988900 | -1.72153600 |

|                                            |             |             |                             |
|--------------------------------------------|-------------|-------------|-----------------------------|
| C                                          | -0.48008500 | 0.00136300  | -3.08987700                 |
| H                                          | -0.27394800 | 1.06094800  | -2.91326100                 |
| H                                          | -0.54202800 | -0.14987000 | -4.17412900                 |
| H                                          | -1.46884400 | -0.21355800 | -2.67190600                 |
| C                                          | 2.60361900  | 0.73241200  | -2.78285200                 |
| H                                          | 3.53996500  | 0.94015700  | -2.25973100                 |
| H                                          | 2.82994300  | 0.66115200  | -3.85360100                 |
| H                                          | 1.94648000  | 1.59634000  | -2.65051200                 |
| C                                          | 4.03659800  | -1.79615000 | -1.38771500                 |
| H                                          | 4.48887600  | -2.48187400 | -2.11446300                 |
| H                                          | 4.58756100  | -0.85535900 | -1.43503900                 |
| H                                          | 4.20136600  | -2.24268500 | -0.40077400                 |
| Co                                         | 0.96748400  | -1.00769400 | -0.50609800                 |
| C                                          | -7.29515200 | 3.25982600  | -0.24209500                 |
| H                                          | -7.57628800 | 3.46348600  | -1.27850400                 |
| H                                          | -8.08851600 | 2.66485300  | 0.21694900                  |
| H                                          | -7.27705000 | 4.22456600  | 0.27737800                  |
| C                                          | 6.91425000  | 3.29410400  | 0.89254300                  |
| H                                          | 7.66060900  | 2.49799600  | 0.92910200                  |
| H                                          | 7.19848600  | 3.98836900  | 0.09639600                  |
| H                                          | 6.98242400  | 3.85374300  | 1.83150400                  |
| Zero-point correction=                     |             |             | 0.702771 (Hartree/Particle) |
| Thermal correction to Energy=              |             |             | 0.748224                    |
| Thermal correction to Enthalpy=            |             |             | 0.749169                    |
| Thermal correction to Gibbs Free Energy=   |             |             | 0.624565                    |
| Sum of electronic and zero-point Energies= |             |             | -2312.071049                |
| Sum of electronic and thermal Energies=    |             |             | -2312.025595                |

Sum of electronic and thermal Enthalpies= -2312.024651

Sum of electronic and thermal Free Energies= -2312.149255

E(RM06L) = -2312.773820 A.U.

**(S)C-TS6**

1 1

Number of imaginary frequencies: 1

|   |             |             |             |
|---|-------------|-------------|-------------|
| C | 1.67542600  | -0.58448500 | -0.72874100 |
| C | 3.01159200  | -1.10758300 | -1.02246300 |
| C | 3.31638700  | -2.47820100 | -0.96132400 |
| C | 4.04644300  | -0.21791600 | -1.35602500 |
| C | 4.59889700  | -2.92649000 | -1.23703400 |
| H | 2.56859900  | -3.19245700 | -0.62551000 |
| C | 5.32731000  | -0.67787400 | -1.62920800 |
| H | 3.84414500  | 0.85058900  | -1.40647100 |
| C | 5.62969600  | -2.04205200 | -1.58255300 |
| H | 4.81492400  | -3.99024900 | -1.16612200 |
| H | 6.10828200  | 0.03347500  | -1.88721500 |
| C | 0.49919900  | -1.27376900 | -0.72163000 |
| P | -0.04340100 | -3.00945800 | -0.55036900 |
| C | -1.43923800 | -2.00654700 | 0.05642400  |
| C | -2.63289500 | -2.32623200 | 0.76904200  |
| C | -3.46208900 | -1.31130500 | 1.29217000  |
| C | -3.01238100 | -3.66760700 | 0.97178700  |
| C | -4.62224800 | -1.62973400 | 1.97277900  |
| H | -3.17641200 | -0.27091300 | 1.14538200  |
| C | -4.17726300 | -3.97581500 | 1.65512300  |
| H | -2.37214800 | -4.46478800 | 0.60030700  |

|   |             |             |             |
|---|-------------|-------------|-------------|
| C | -5.00450100 | -2.96812200 | 2.16896000  |
| H | -5.25318200 | -0.83518100 | 2.36641300  |
| H | -4.45615800 | -5.01603600 | 1.80197300  |
| C | -0.79341100 | -0.79736600 | -0.21893900 |
| C | -0.41391200 | -3.74287800 | -2.16882800 |
| H | -0.99165000 | -4.65815000 | -2.01977400 |
| H | -0.96190500 | -3.07817600 | -2.83957900 |
| H | 0.53352000  | -4.01649600 | -2.64064400 |
| O | 0.66453900  | -3.96467300 | 0.35735100  |
| C | 0.91444300  | 2.97057200  | 0.06297300  |
| C | 1.84956300  | 2.61435200  | 1.05236400  |
| C | 2.26184400  | 3.48959800  | 2.05149500  |
| C | 1.71566000  | 4.76974100  | 2.03386100  |
| C | 0.78765500  | 5.15223300  | 1.05766300  |
| C | 0.37834900  | 4.25823600  | 0.07511100  |
| C | 0.67114100  | 1.79087000  | -0.76110700 |
| C | 1.53431100  | 0.78465400  | -0.24680500 |
| H | 2.99542000  | 3.19366500  | 2.79069100  |
| H | 2.02270100  | 5.48493300  | 2.79034600  |
| H | 0.38211400  | 6.15905300  | 1.07109900  |
| H | -0.36454100 | 4.55245600  | -0.66082800 |
| H | 0.62391400  | 1.84915600  | -1.84332200 |
| C | 3.00114900  | 0.47385600  | 1.71238500  |
| N | 4.06436900  | 1.07932900  | 2.23068200  |
| C | 4.82492000  | 0.30157600  | 3.01026600  |
| C | 4.53478900  | -1.03746400 | 3.24231100  |
| C | 3.37397000  | -1.53301700 | 2.65644200  |

|   |             |             |             |
|---|-------------|-------------|-------------|
| N | 2.58489100  | -0.77373700 | 1.89434600  |
| H | 5.69889500  | 0.77701500  | 3.45053200  |
| H | 5.17307100  | -1.65898000 | 3.85897000  |
| H | 3.05026100  | -2.56300300 | 2.79490500  |
| N | 2.20719500  | 1.26537200  | 0.83251500  |
| C | -2.83092800 | 0.22342700  | -2.15719400 |
| C | -3.40508700 | 1.31078600  | -1.44291300 |
| C | -2.66240100 | 2.50750600  | -1.77592800 |
| C | -1.64008800 | 2.14564900  | -2.68485900 |
| C | -1.67088900 | 0.71498100  | -2.85456200 |
| C | -0.78379600 | -0.06976700 | -3.75449300 |
| H | 0.23939600  | 0.31831500  | -3.76127300 |
| H | -0.72416300 | -1.11479100 | -3.44257400 |
| H | -1.14596500 | -0.05349800 | -4.78921900 |
| C | -3.40438400 | -1.14074100 | -2.26570200 |
| H | -3.96030200 | -1.43478400 | -1.37292400 |
| H | -4.10391500 | -1.16318100 | -3.10982500 |
| H | -2.64319200 | -1.89957600 | -2.45490400 |
| C | -4.61286700 | 1.30157600  | -0.57882300 |
| H | -4.40942600 | 1.78942900  | 0.38050600  |
| H | -5.42571700 | 1.85928100  | -1.05817200 |
| H | -4.97481400 | 0.29062200  | -0.38221100 |
| C | -2.99122800 | 3.86424200  | -1.26922800 |
| H | -2.35818800 | 4.63375400  | -1.71655600 |
| H | -4.03061700 | 4.11813700  | -1.50341100 |
| H | -2.88089400 | 3.91139700  | -0.18066200 |
| C | -0.71748100 | 3.08110000  | -3.38212600 |

|                                            |             |             |                             |
|--------------------------------------------|-------------|-------------|-----------------------------|
| H                                          | -1.22977700 | 3.51241400  | -4.24949000                 |
| H                                          | -0.39752300 | 3.91375900  | -2.75075800                 |
| H                                          | 0.17666100  | 2.58177700  | -3.76366500                 |
| Co                                         | -1.42681400 | 1.09466100  | -0.84117900                 |
| O                                          | -0.53407300 | 0.58628300  | 2.00104700                  |
| O                                          | -1.85262400 | 1.98102600  | 0.85952900                  |
| C                                          | -1.24273100 | 1.62956700  | 1.92450500                  |
| C                                          | -1.35374000 | 2.52836300  | 3.11443600                  |
| H                                          | -2.31655800 | 3.03957300  | 3.12810000                  |
| H                                          | -1.19472300 | 1.97521700  | 4.03923400                  |
| H                                          | -0.57319200 | 3.29323600  | 3.03252300                  |
| H                                          | -0.73924300 | -0.02296200 | 0.79479400                  |
| C                                          | 7.00119000  | -2.54500600 | -1.90358200                 |
| H                                          | 7.05699100  | -2.90412600 | -2.93743600                 |
| H                                          | 7.75693100  | -1.76373400 | -1.79406400                 |
| H                                          | 7.28386600  | -3.38589300 | -1.26452300                 |
| C                                          | -6.24362900 | -3.30404600 | 2.93244500                  |
| H                                          | -7.03418500 | -2.56720300 | 2.76873700                  |
| H                                          | -6.63081400 | -4.29011100 | 2.66680900                  |
| H                                          | -6.04391600 | -3.31797200 | 4.01010900                  |
| Zero-point correction=                     |             |             | 0.764527 (Hartree/Particle) |
| Thermal correction to Energy=              |             |             | 0.814955                    |
| Thermal correction to Enthalpy=            |             |             | 0.815899                    |
| Thermal correction to Gibbs Free Energy=   |             |             | 0.680975                    |
| Sum of electronic and zero-point Energies= |             |             | -2541.169303                |
| Sum of electronic and thermal Energies=    |             |             | -2541.118875                |
| Sum of electronic and thermal Enthalpies=  |             |             | -2541.117930                |

Sum of electronic and thermal Free Energies= -2541.252854

E(RM06L) = -2541.933830 A.U.

**(T)C-TS6**

1 3

Number of imaginary frequencies: 1

|   |             |             |             |
|---|-------------|-------------|-------------|
| C | 1.73765500  | -0.69457000 | -0.65776100 |
| C | 2.98499400  | -1.35870100 | -1.04055200 |
| C | 3.19423400  | -2.74068900 | -0.88101900 |
| C | 4.02633200  | -0.59332600 | -1.59229500 |
| C | 4.38706400  | -3.32114200 | -1.27926300 |
| H | 2.44981700  | -3.35403200 | -0.37930200 |
| C | 5.21437300  | -1.18716200 | -1.99470100 |
| H | 3.89224900  | 0.47832300  | -1.72154700 |
| C | 5.41845800  | -2.56286900 | -1.85274700 |
| H | 4.53457900  | -4.38822600 | -1.12836200 |
| H | 6.00087800  | -0.57365900 | -2.42749100 |
| C | 0.51141800  | -1.28638500 | -0.55768700 |
| P | -0.13353300 | -2.97894100 | -0.32614500 |
| C | -1.45392800 | -1.87740400 | 0.29547500  |
| C | -2.67273300 | -2.08175100 | 0.99715100  |
| C | -3.41446700 | -0.99824500 | 1.52088400  |
| C | -3.18712600 | -3.38544700 | 1.16669900  |
| C | -4.62252900 | -1.21392500 | 2.15678100  |
| H | -3.02497900 | 0.01601300  | 1.42781200  |
| C | -4.39704800 | -3.58978000 | 1.80439300  |
| H | -2.61604900 | -4.23290900 | 0.79426500  |
| C | -5.13970600 | -2.51206300 | 2.31176000  |

|   |             |             |             |
|---|-------------|-------------|-------------|
| H | -5.18164100 | -0.37035300 | 2.55573000  |
| H | -4.78088100 | -4.59960400 | 1.92270700  |
| C | -0.74082500 | -0.71561300 | -0.03743600 |
| C | -0.62643700 | -3.69296200 | -1.91921300 |
| H | -1.28723000 | -4.54594900 | -1.74762600 |
| H | -1.12050300 | -2.97000600 | -2.57074000 |
| H | 0.27497700  | -4.05854800 | -2.41822700 |
| O | 0.50990800  | -3.96926500 | 0.59121500  |
| C | 1.51328600  | 2.98843100  | -0.30255700 |
| C | 2.39207800  | 2.63855400  | 0.75296700  |
| C | 2.90705200  | 3.59818300  | 1.62484100  |
| C | 2.53153000  | 4.92043600  | 1.41677700  |
| C | 1.67039900  | 5.28846700  | 0.37164500  |
| C | 1.15907900  | 4.33083900  | -0.49046300 |
| C | 1.14881500  | 1.77352100  | -0.96216400 |
| C | 1.78896000  | 0.73469000  | -0.32779800 |
| H | 3.58901700  | 3.32179900  | 2.41716300  |
| H | 2.92752900  | 5.68722800  | 2.07545600  |
| H | 1.40979200  | 6.33340900  | 0.23490000  |
| H | 0.49461000  | 4.61865300  | -1.30144700 |
| H | 0.60715400  | 1.66155600  | -1.88990100 |
| C | 3.15875700  | 0.46256700  | 1.72811500  |
| N | 4.11840300  | 1.04688700  | 2.44563600  |
| C | 4.67299100  | 0.27648400  | 3.38593700  |
| C | 4.30272400  | -1.04654600 | 3.59401800  |
| C | 3.28723400  | -1.53412400 | 2.77858800  |
| N | 2.69624600  | -0.78104400 | 1.85194400  |

|   |             |             |             |
|---|-------------|-------------|-------------|
| H | 5.45214700  | 0.74510900  | 3.98445600  |
| H | 4.77539500  | -1.66017000 | 4.35136300  |
| H | 2.91754600  | -2.55515700 | 2.86426300  |
| N | 2.56002800  | 1.24557400  | 0.71944500  |
| C | -3.20775700 | 0.09035000  | -1.94403000 |
| C | -3.76285900 | 1.25316300  | -1.36756900 |
| C | -2.93654100 | 2.36545000  | -1.76790300 |
| C | -1.92699000 | 1.90227000  | -2.67020500 |
| C | -2.03947900 | 0.49425100  | -2.73896600 |
| C | -1.20445800 | -0.41363900 | -3.57201100 |
| H | -0.83101800 | 0.09831000  | -4.46230100 |
| H | -0.32865200 | -0.79031100 | -3.02553600 |
| H | -1.77874800 | -1.28105600 | -3.91017000 |
| C | -3.79768600 | -1.27342000 | -1.94220200 |
| H | -4.44907900 | -1.44260300 | -1.08097600 |
| H | -4.40397600 | -1.41467700 | -2.84518900 |
| H | -3.03594700 | -2.05774600 | -1.93904400 |
| C | -4.96352800 | 1.35571100  | -0.49379800 |
| H | -4.75365900 | 1.92942800  | 0.41589300  |
| H | -5.78286000 | 1.86727400  | -1.01069900 |
| H | -5.32595600 | 0.37154000  | -0.18901300 |
| C | -3.12575500 | 3.77667900  | -1.35415700 |
| H | -2.16839000 | 4.27140600  | -1.16742200 |
| H | -3.63596900 | 4.33776200  | -2.14638000 |
| H | -3.72570200 | 3.85897900  | -0.44656300 |
| C | -0.98976100 | 2.77543200  | -3.42793900 |
| H | -1.51255800 | 3.26190500  | -4.25940400 |

|                                              |             |             |                             |
|----------------------------------------------|-------------|-------------|-----------------------------|
| H                                            | -0.57687000 | 3.57511200  | -2.80628800                 |
| H                                            | -0.15119700 | 2.21980000  | -3.85390200                 |
| Co                                           | -1.72811700 | 0.96766900  | -0.67383100                 |
| O                                            | -0.24260800 | 0.95089100  | 1.95207400                  |
| O                                            | -1.58745400 | 2.28167000  | 0.74310500                  |
| C                                            | -0.80829900 | 2.05792400  | 1.73975900                  |
| C                                            | -0.57487700 | 3.19463700  | 2.68101400                  |
| H                                            | -1.52641400 | 3.64284700  | 2.97248200                  |
| H                                            | -0.02119000 | 2.86843800  | 3.55966400                  |
| H                                            | 0.00001600  | 3.96591400  | 2.15686300                  |
| H                                            | -0.57041200 | 0.15174900  | 0.89698700                  |
| C                                            | 6.68925400  | -3.21110000 | -2.30030300                 |
| H                                            | 6.53991600  | -3.77139400 | -3.23006300                 |
| H                                            | 7.47676500  | -2.47744800 | -2.48571100                 |
| H                                            | 7.05826200  | -3.92786200 | -1.56113500                 |
| C                                            | -6.42482000 | -2.74127400 | 3.03522600                  |
| H                                            | -7.09444500 | -1.88134100 | 2.96090300                  |
| H                                            | -6.94924200 | -3.62411000 | 2.66247200                  |
| H                                            | -6.24090300 | -2.91004400 | 4.10260000                  |
| Zero-point correction=                       |             |             | 0.762905 (Hartree/Particle) |
| Thermal correction to Energy=                |             |             | 0.813945                    |
| Thermal correction to Enthalpy=              |             |             | 0.814889                    |
| Thermal correction to Gibbs Free Energy=     |             |             | 0.676738                    |
| Sum of electronic and zero-point Energies=   |             |             | -2541.162216                |
| Sum of electronic and thermal Energies=      |             |             | -2541.111175                |
| Sum of electronic and thermal Enthalpies=    |             |             | -2541.110231                |
| Sum of electronic and thermal Free Energies= |             |             | -2541.248383                |

$$E(\text{RM06L}) = -2541.925120 \quad \text{A.U.}$$
